# Supplementary material for: Characterization of circulating breast cancer cells with tumorigenic and metastatic capacity
Source: PubMed Central journal article supplement (PMC7507517; doi:10.15252/emmm.201911908), 2020-07-15
Supplement: EMMM-12-e11908-s007.pdf [file EMMM-12-e11908-s007.pdf]

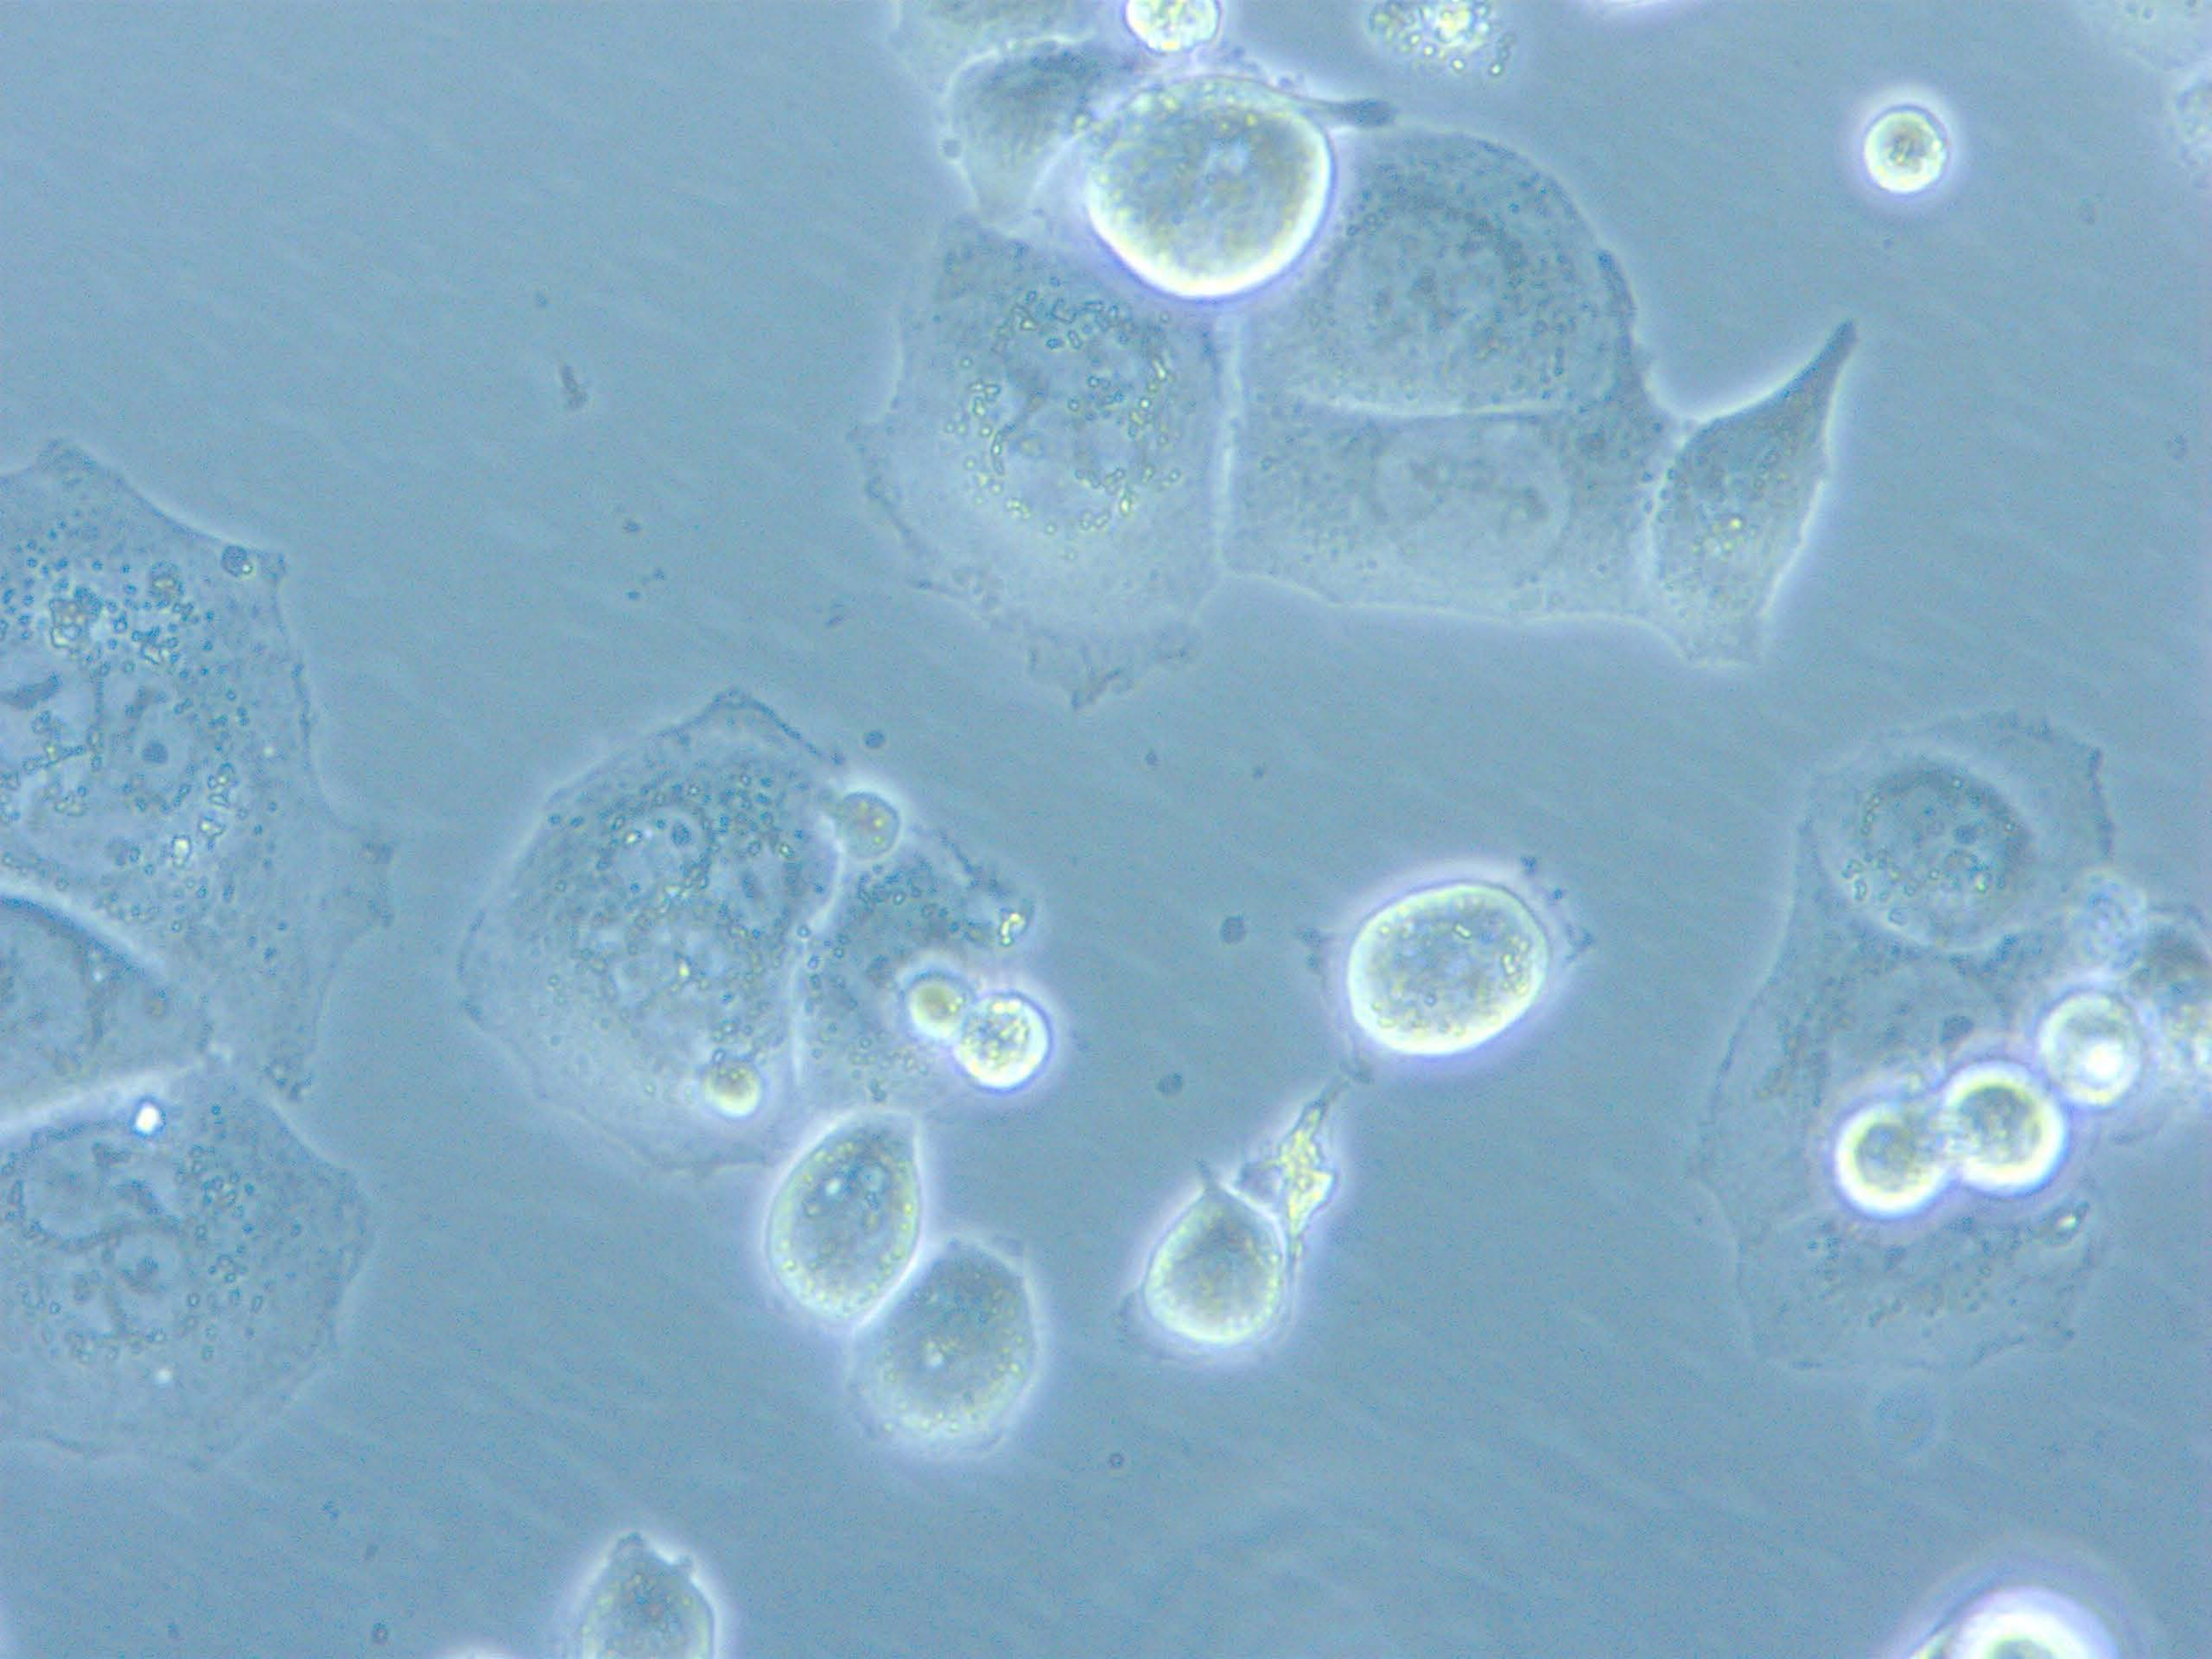



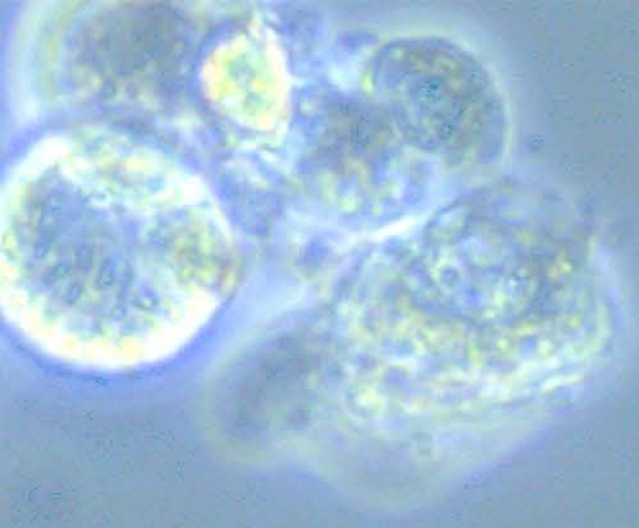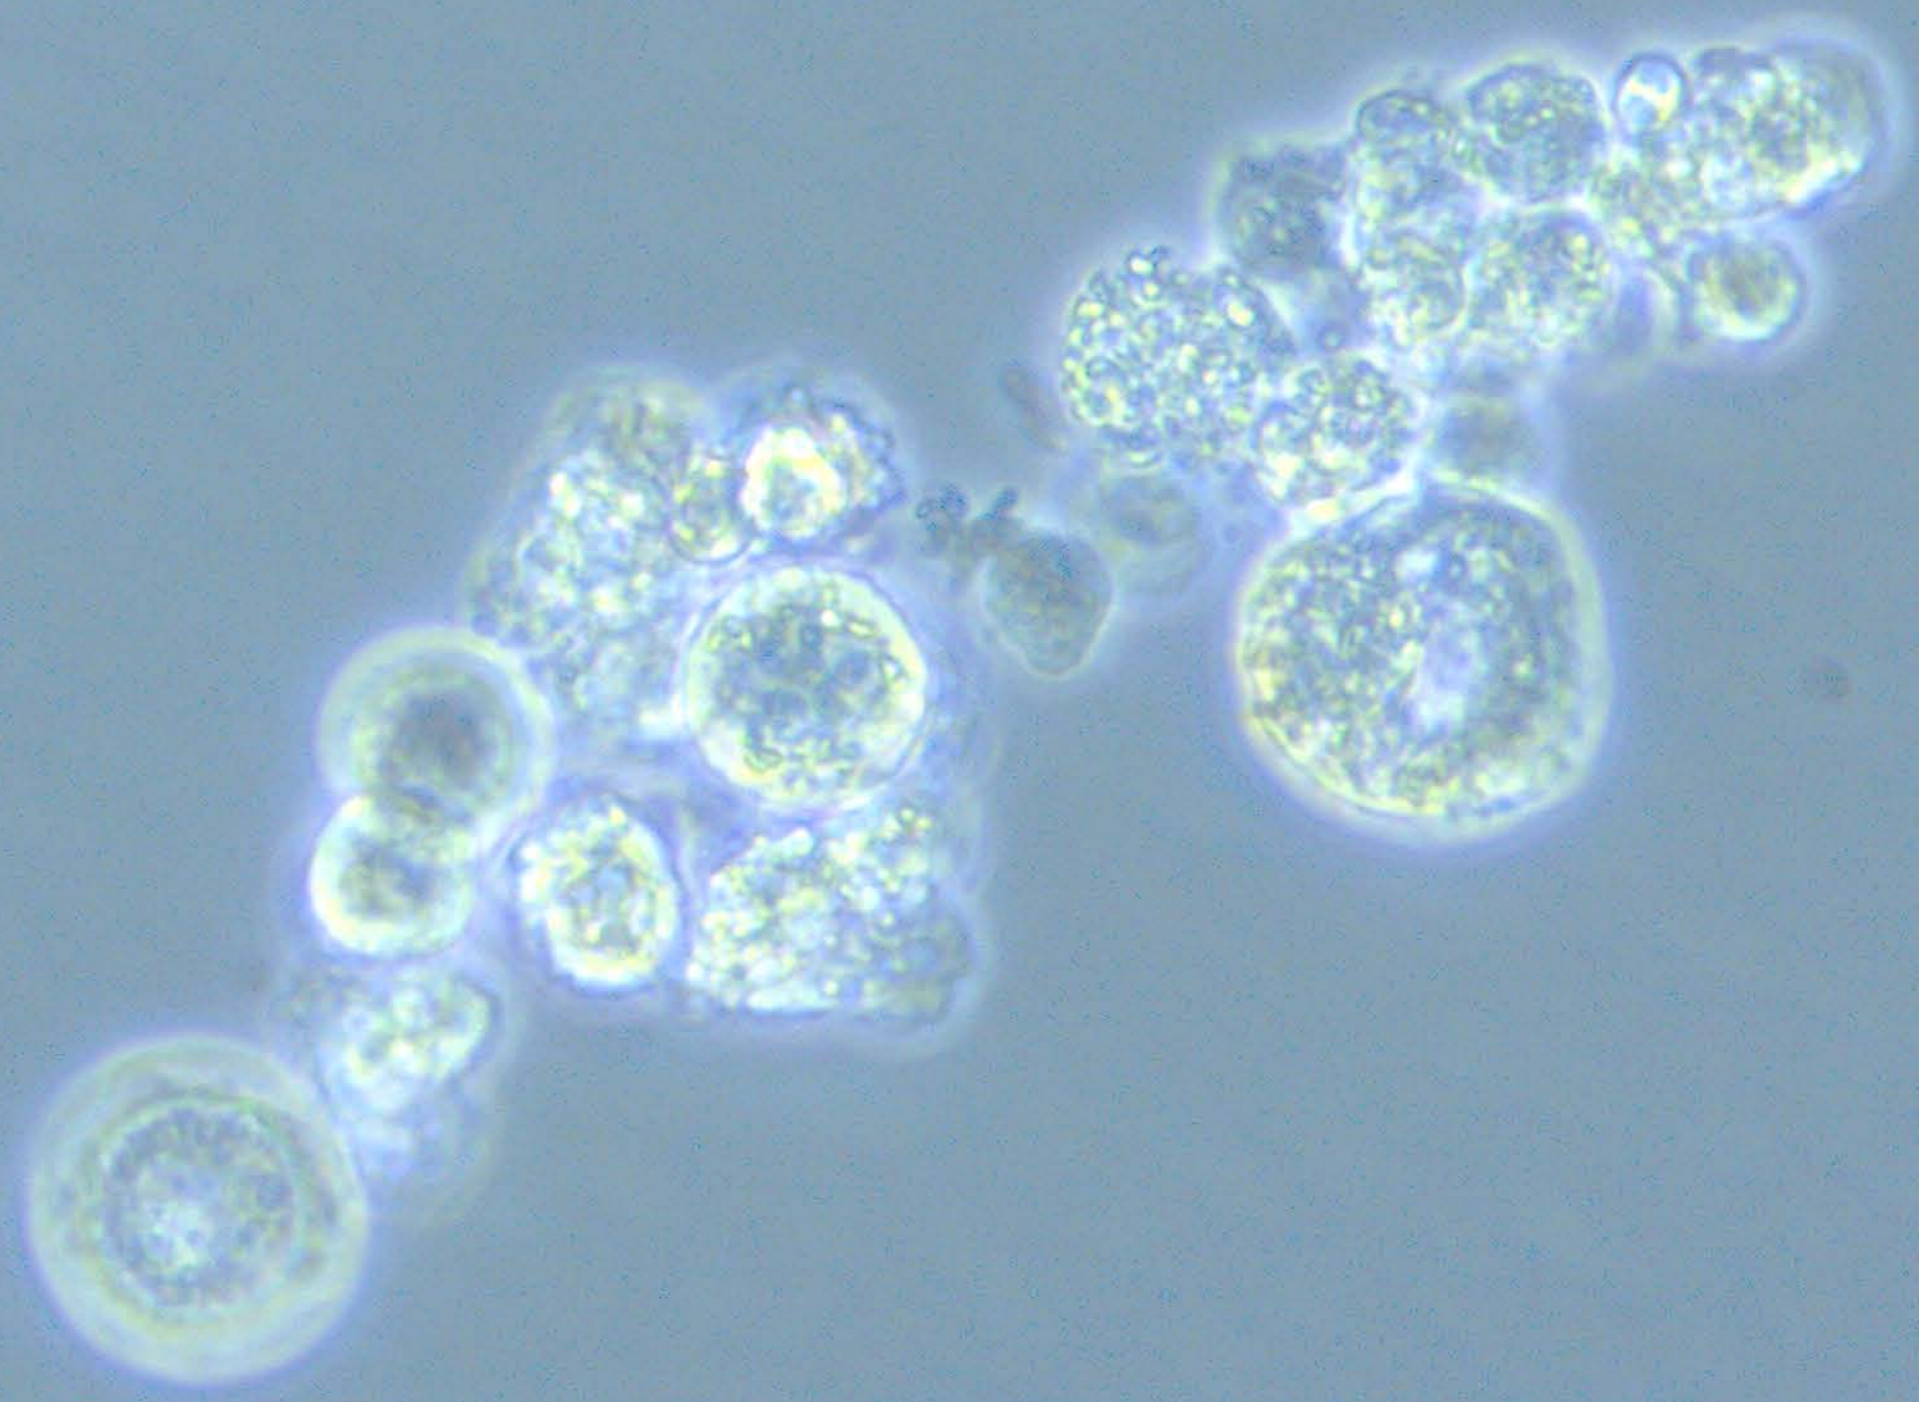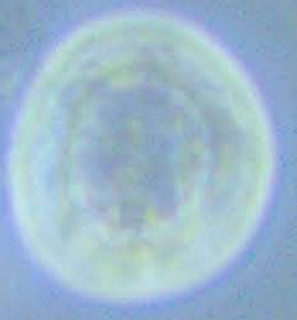



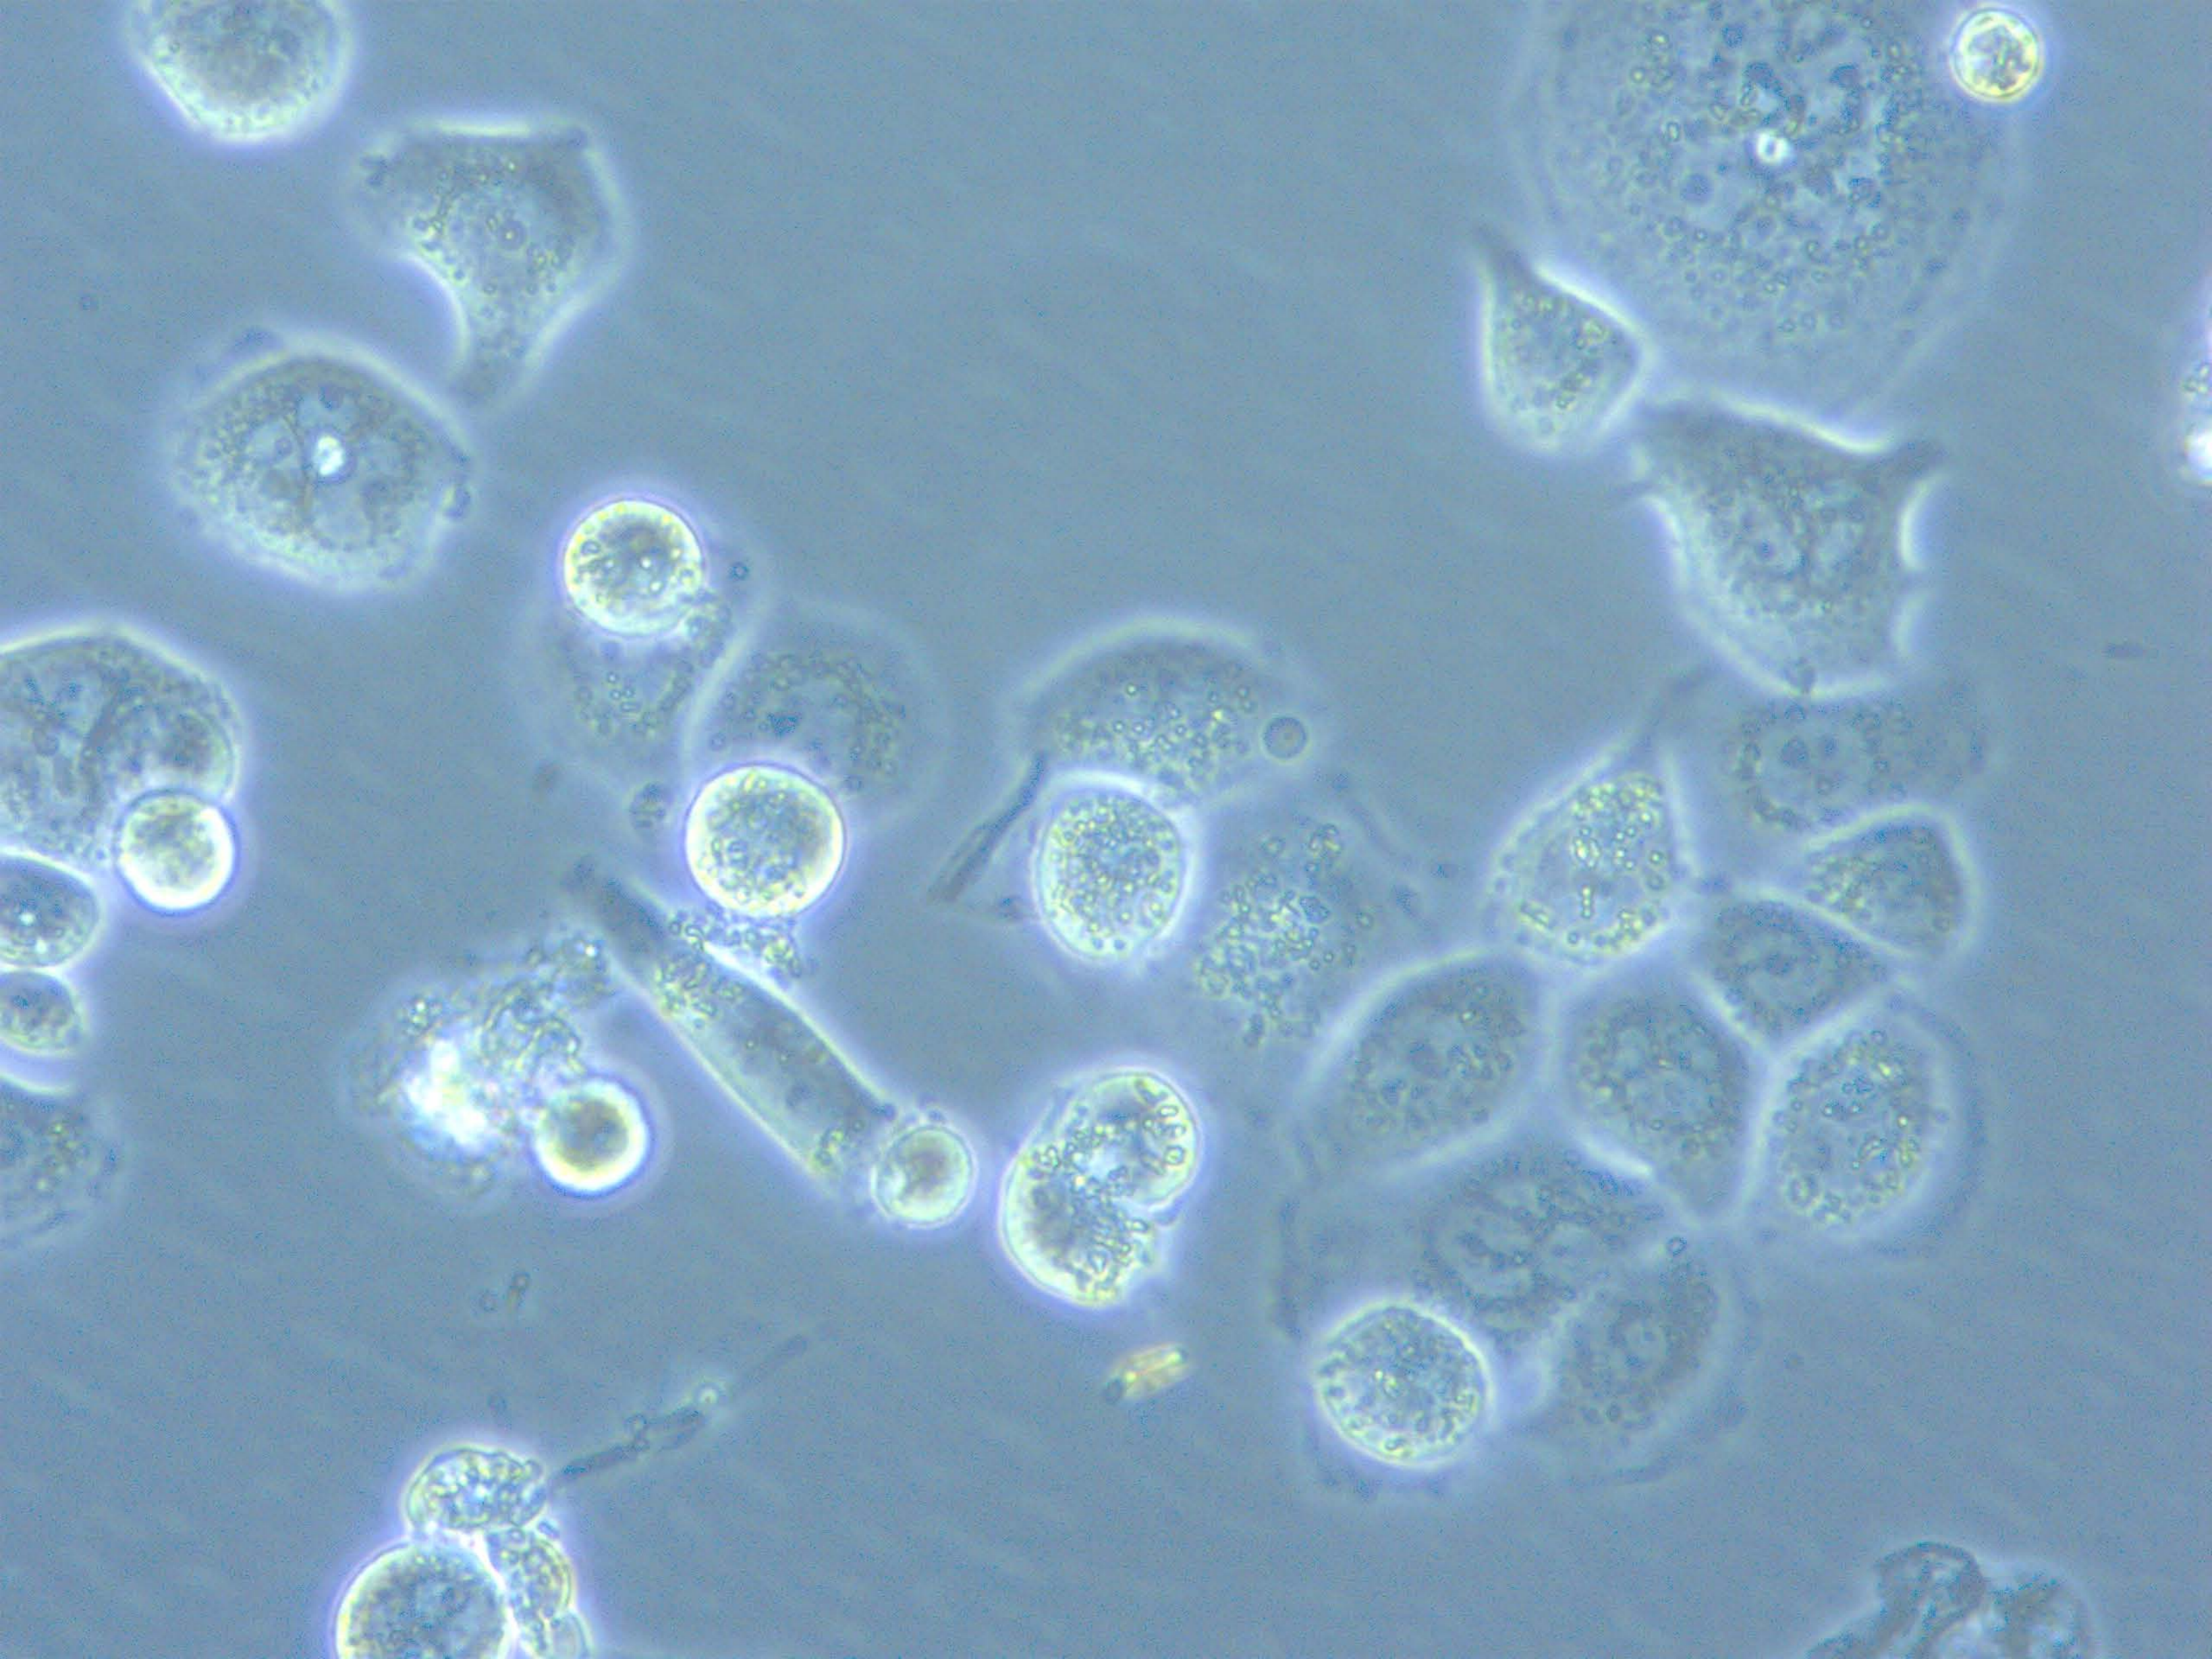



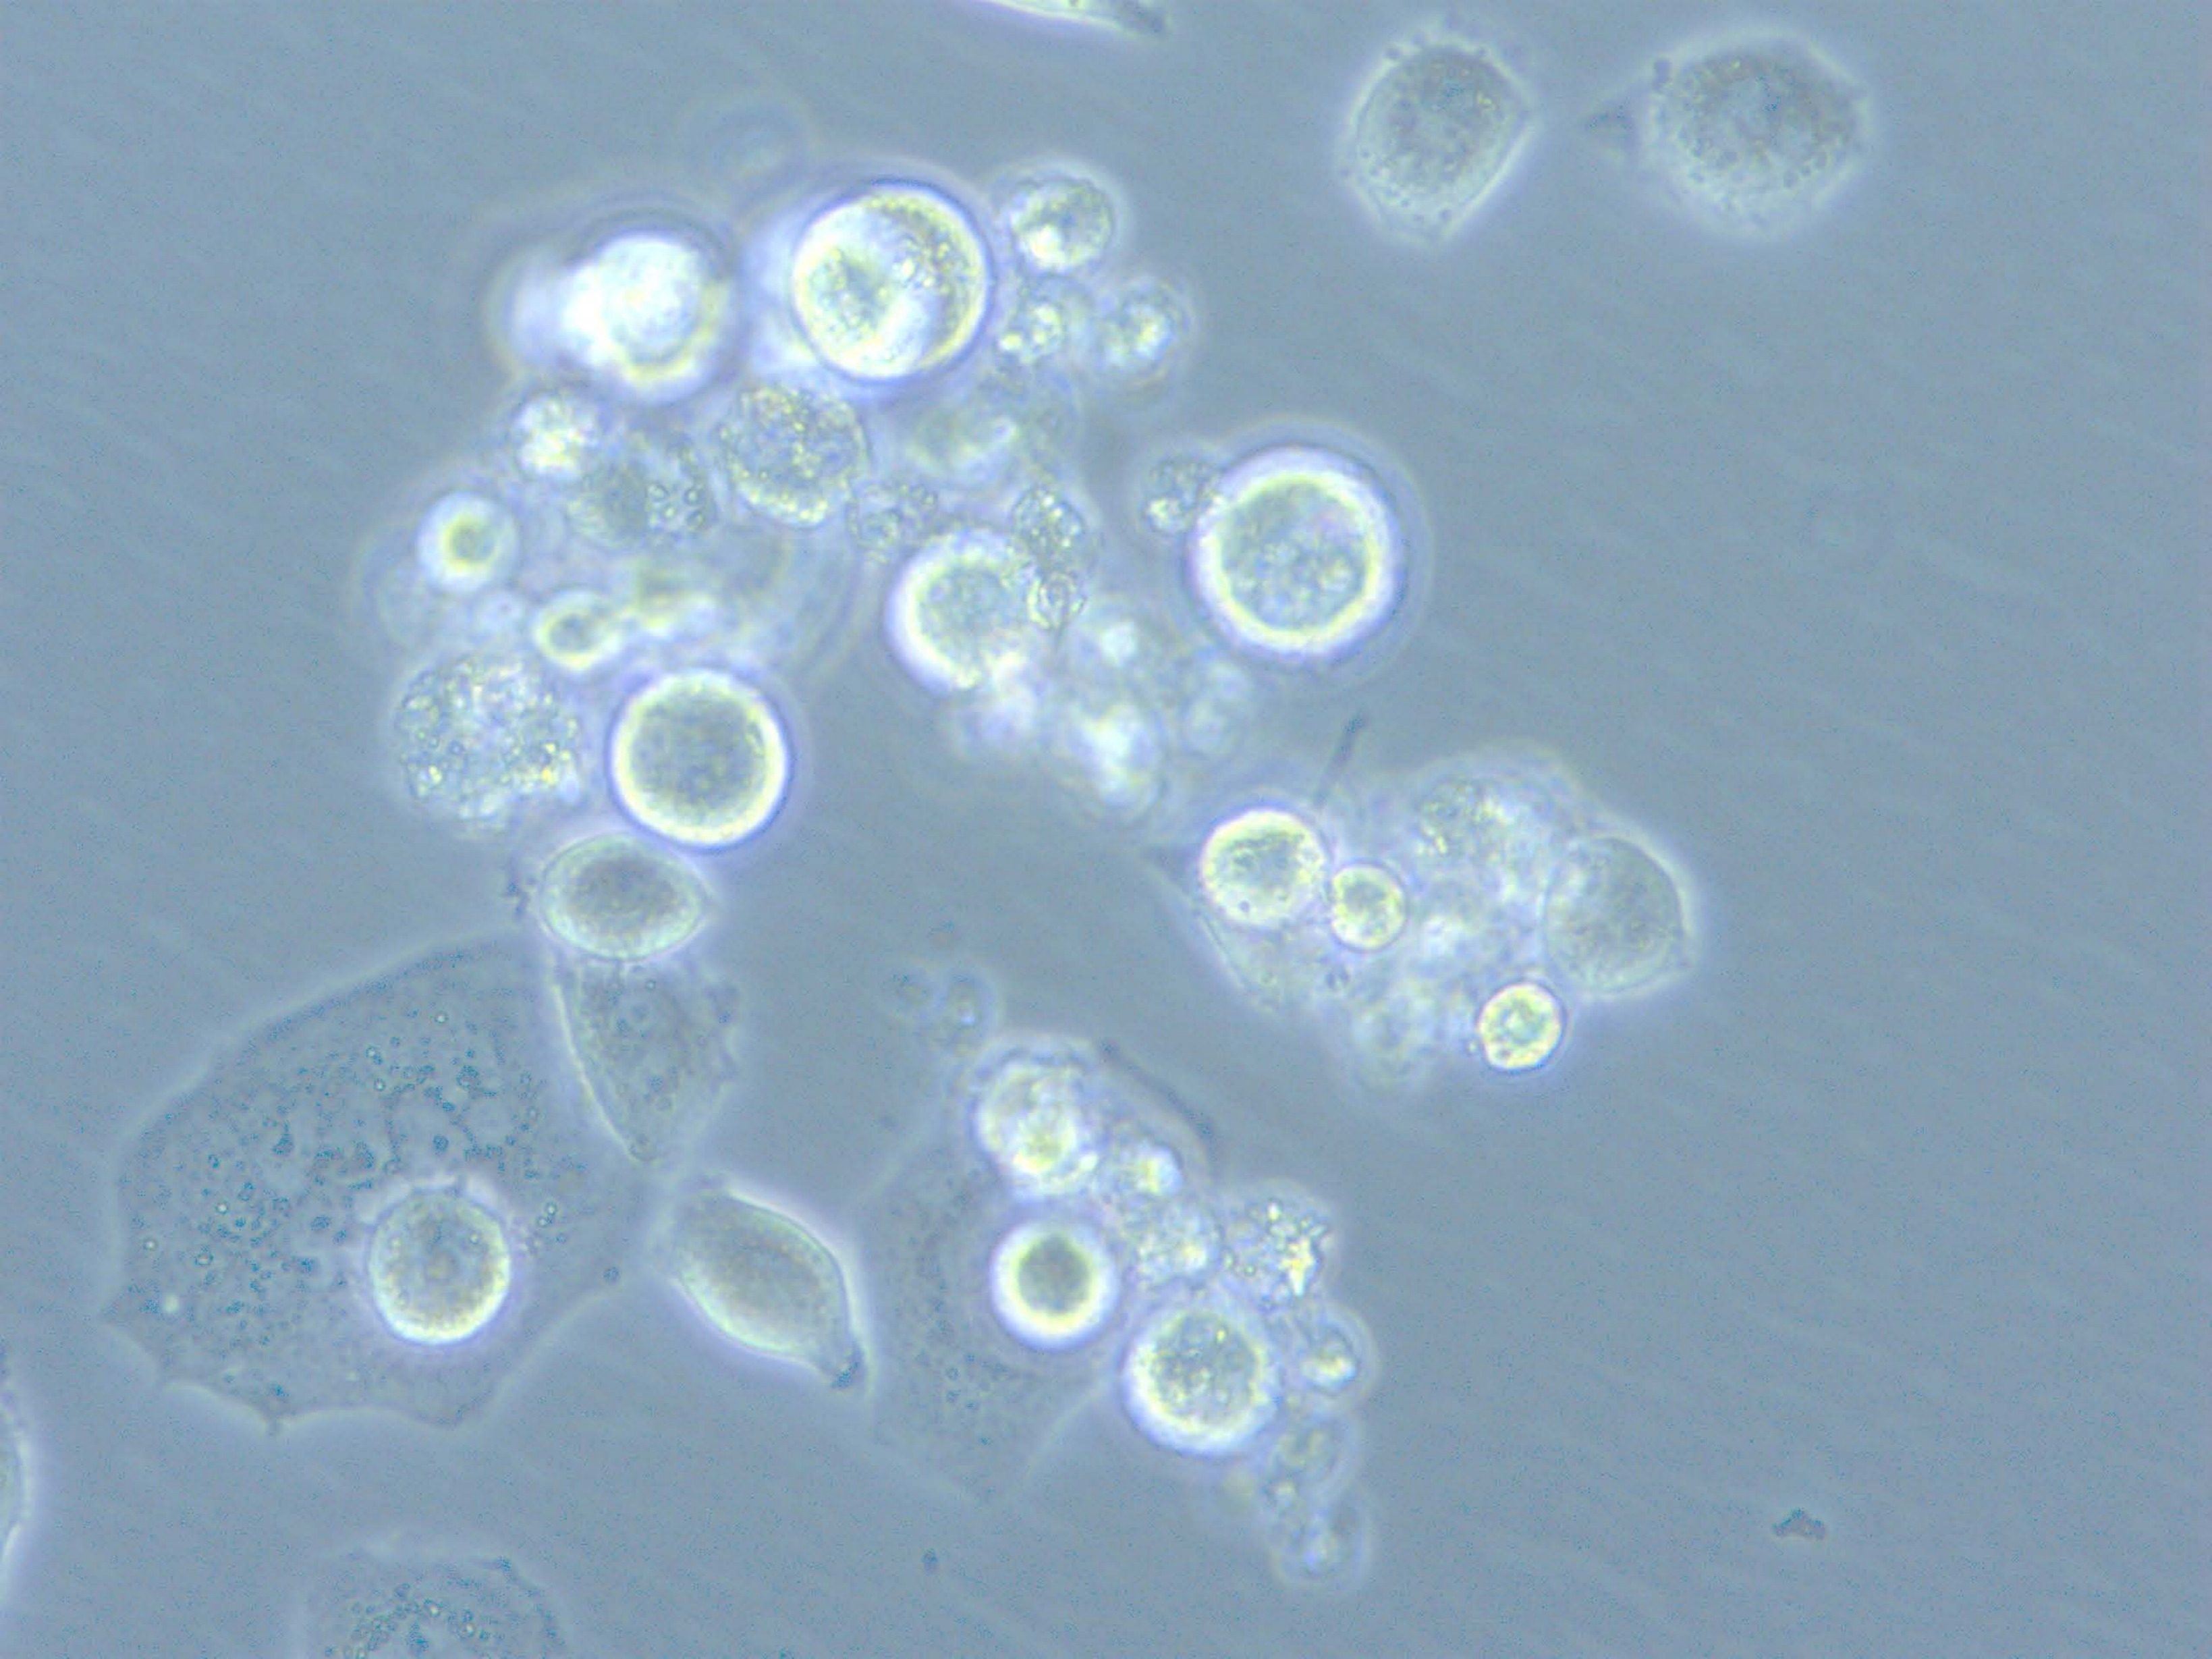



Proben-ID: Gyn14.208

Kassetten-ID: 01327106

Patienten-ID:

| Ereignis | Aufnahme | DAPI/CK-PE                                                                          | CK-PE                                                                               | DAPI                                                                                 | CD45-APC                                                                              | HER-2/neu                                                                             |
|----------|----------|-------------------------------------------------------------------------------------|-------------------------------------------------------------------------------------|--------------------------------------------------------------------------------------|---------------------------------------------------------------------------------------|---------------------------------------------------------------------------------------|
| 4001     | 32       | 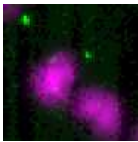   |    |    |    |    |
| 4002     | 32       |    |    |    |    |    |
| 4003     | 32       |    |    |    |    |    |
| 4004     | 32       |    |    |    |    |    |
| 4005     | 32       |    |    |    |    |    |
| 4006     | 32       |   |   |   |   |   |
| 4007     | 32       |  |  |  |  |  |
| 4008     | 32       |  |  |  |  |  |
| 4009     | 32       |  |  |  |  |  |
| 4010     | 32       |  |  |  |  |  |
| 4011     | 32       |  |  |  |  |  |
| 4012     | 32       |  |  |  |  |  |



| Ereignis | Aufnahme | DAPI/CK-PE | CK-PE | DAPI | CD45-APC | HER-2/neu |
|----------|----------|------------|-------|------|----------|-----------|
| 4013     | 32       |            |       |      |          |           |
| 4014     | 32       |            |       |      |          |           |
| 4015     | 32       |            |       |      |          |           |
| 4016     | 31       |            |       |      |          |           |
| 4017     | 32       |            |       |      |          |           |
| 4018     | 33       |            |       |      |          |           |
| 4019     | 33       |            |       |      |          |           |
| 4020     | 33       |            |       |      |          |           |
| 4021     | 33       |            |       |      |          |           |
| 4022     | 33       |            |       |      |          |           |
| 4023     | 33       |            |       |      |          |           |
| 4024     | 33       |            |       |      |          |           |



| Ereignis | Aufnahme | DAPI/CK-PE | CK-PE | DAPI | CD45-APC | HER-2/neu |
|----------|----------|------------|-------|------|----------|-----------|
| 4025     | 33       |            |       |      |          |           |
| 4026     | 33       |            |       |      |          |           |
| 4027     | 33       |            |       |      |          |           |
| 4028     | 33       |            |       |      |          |           |
| 4029     | 33       |            |       |      |          |           |
| 4030     | 33       |            |       |      |          |           |
| 4031     | 33       |            |       |      |          |           |
| 4032     | 33       |            |       |      |          |           |
| 4033     | 33       |            |       |      |          |           |
| 4034     | 33       |            |       |      |          |           |
| 4035     | 33       |            |       |      |          |           |
| 4036     | 33       |            |       |      |          |           |
| 4037     | 33       |            |       |      |          |           |



| Ereignis | Aufnahme | DAPI/CK-PE | CK-PE | DAPI | CD45-APC | HER-2/neu |
|----------|----------|------------|-------|------|----------|-----------|
| 4038     | 33       |            |       |      |          |           |
| 4039     | 33       |            |       |      |          |           |
| 4040     | 33       |            |       |      |          |           |
| 4041     | 33       |            |       |      |          |           |
| 4042     | 33       |            |       |      |          |           |
| 4043     | 33       |            |       |      |          |           |
| 4044     | 33       |            |       |      |          |           |
| 4045     | 33       |            |       |      |          |           |
| 4046     | 33       |            |       |      |          |           |
| 4047     | 33       |            |       |      |          |           |
| 4048     | 33       |            |       |      |          |           |

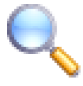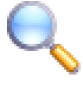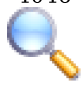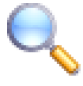



| Ereignis | Aufnahme | DAPI/CK-PE | CK-PE | DAPI | CD45-APC | HER-2/neu |
|----------|----------|------------|-------|------|----------|-----------|
| 4049     | 33       |            |       |      |          |           |
| 4050     | 33       |            |       |      |          |           |
| 4051     | 33       |            |       |      |          |           |
| 4052     | 33       |            |       |      |          |           |
| 4053     | 33       |            |       |      |          |           |
| 4054     | 33       |            |       |      |          |           |
| 4055     | 33       |            |       |      |          |           |
| 4056     | 33       |            |       |      |          |           |
| 4057     | 33       |            |       |      |          |           |
| 4058     | 33       |            |       |      |          |           |
| 4059     | 33       |            |       |      |          |           |
| 4060     | 33       |            |       |      |          |           |
| 4061     | 33       |            |       |      |          |           |

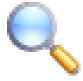



| Ereignis | Aufnahme | DAPI/CK-PE | CK-PE | DAPI | CD45-APC | HER-2/neu |
|----------|----------|------------|-------|------|----------|-----------|
| 4062     | 33       |            |       |      |          |           |
| 4063     | 33       |            |       |      |          |           |
| 4064     | 33       |            |       |      |          |           |
| 4065     | 33       |            |       |      |          |           |
| 4066     | 33       |            |       |      |          |           |
| 4067     | 33       |            |       |      |          |           |
| 4068     | 33       |            |       |      |          |           |
| 4069     | 33       |            |       |      |          |           |
| 4070     | 33       |            |       |      |          |           |
| 4071     | 33       |            |       |      |          |           |
| 4072     | 33       |            |       |      |          |           |

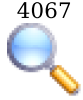



| Ereignis | Aufnahme | DAPI/CK-PE | CK-PE | DAPI | CD45-APC | HER-2/neu |
|----------|----------|------------|-------|------|----------|-----------|
| 4073     | 33       |            |       |      |          |           |
| 4074     | 33       |            |       |      |          |           |
| 4075     | 33       |            |       |      |          |           |
| 4076     | 33       |            |       |      |          |           |
| 4077     | 33       |            |       |      |          |           |
| 4078     | 33       |            |       |      |          |           |
| 4079     | 33       |            |       |      |          |           |
| 4080     | 33       |            |       |      |          |           |
| 4081     | 33       |            |       |      |          |           |
| 4082     | 33       |            |       |      |          |           |
| 4083     | 33       |            |       |      |          |           |
| 4084     | 33       |            |       |      |          |           |



| Ereignis | Aufnahme | DAPI/CK-PE | CK-PE | DAPI | CD45-APC | HER-2/neu |
|----------|----------|------------|-------|------|----------|-----------|
| 4085     | 33       |            |       |      |          |           |
| 4086     | 33       |            |       |      |          |           |
| 4087     | 33       |            |       |      |          |           |
| 4088     | 33       |            |       |      |          |           |
| 4089     | 33       |            |       |      |          |           |
| 4090     | 33       |            |       |      |          |           |
| 4091     | 33       |            |       |      |          |           |
| 4092     | 33       |            |       |      |          |           |
| 4093     | 33       |            |       |      |          |           |
| 4094     | 33       |            |       |      |          |           |
| 4095     | 33       |            |       |      |          |           |
| 4096     | 33       |            |       |      |          |           |

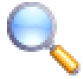



| Ereignis                                                                                 | Aufnahme | DAPI/CK-PE                                                                          | CK-PE                                                                               | DAPI                                                                                 | CD45-APC                                                                              | HER-2/neu                                                                             |
|------------------------------------------------------------------------------------------|----------|-------------------------------------------------------------------------------------|-------------------------------------------------------------------------------------|--------------------------------------------------------------------------------------|---------------------------------------------------------------------------------------|---------------------------------------------------------------------------------------|
| 4097    | 33       |    |    |    |    |    |
| 4098                                                                                     | 33       |    |    |    |    |    |
| 4099    | 33       |    |    |    |    |    |
| 4100                                                                                     | 33       |    |    |    |    |    |
| 4101                                                                                     | 33       |    |    |    |    |    |
| 4102                                                                                     | 33       |   |   |   |   |   |
| 4103  | 33       |  |  |  |  |  |
| 4104                                                                                     | 33       |  |  |  |  |  |
| 4105                                                                                     | 33       |  |  |  |  |  |
| 4106                                                                                     | 33       |  |  |  |  |  |



| Ereignis | Aufnahme | DAPI/CK-PE                                                                          | CK-PE                                                                               | DAPI                                                                                 | CD45-APC                                                                              | HER-2/neu                                                                             |
|----------|----------|-------------------------------------------------------------------------------------|-------------------------------------------------------------------------------------|--------------------------------------------------------------------------------------|---------------------------------------------------------------------------------------|---------------------------------------------------------------------------------------|
| 4107     | 33       | 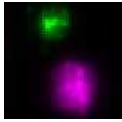   |    |    |    |    |
| 4108     | 33       |    |    |    |    |    |
| 4109     | 33       |    |    |    |    |    |
| 4110     | 33       |    |    |    |    |    |
| 4111     | 33       |    |    |    |    |    |
| 4112     | 33       |    |    |    |    |    |
| 4113     | 33       |   |   |   |   |   |
| 4114     | 33       |  |  |  |  |  |
| 4115     | 33       |  |  |  |  |  |
| 4116     | 33       |  |  |  |  |  |
| 4117     | 33       |  |  |  |  |  |
| 4118     | 33       |  |  |  |  |  |
| 4119     | 33       |  |  |  |  |  |



| Ereignis | Aufnahme | DAPI/CK-PE | CK-PE | DAPI | CD45-APC | HER-2/neu |
|----------|----------|------------|-------|------|----------|-----------|
| 4120     | 33       |            |       |      |          |           |
| 4121     | 33       |            |       |      |          |           |
| 4122     | 33       |            |       |      |          |           |
| 4123     | 33       |            |       |      |          |           |
| 4124     | 33       |            |       |      |          |           |
| 4125     | 33       |            |       |      |          |           |
| 4126     | 33       |            |       |      |          |           |
| 4127     | 33       |            |       |      |          |           |
| 4128     | 33       |            |       |      |          |           |
| 4129     | 33       |            |       |      |          |           |
| 4130     | 32       |            |       |      |          |           |

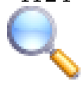



| Ereignis | Aufnahme | DAPI/CK-PE | CK-PE | DAPI | CD45-APC | HER-2/neu |
|----------|----------|------------|-------|------|----------|-----------|
| 4131     | 32       |            |       |      |          |           |
| 4132     | 32       |            |       |      |          |           |
| 4133     | 33       |            |       |      |          |           |
| 4134     | 34       |            |       |      |          |           |
| 4135     | 34       |            |       |      |          |           |
| 4136     | 34       |            |       |      |          |           |
| 4137     | 34       |            |       |      |          |           |
| 4138     | 34       |            |       |      |          |           |
| 4139     | 34       |            |       |      |          |           |
| 4140     | 34       |            |       |      |          |           |
| 4141     | 34       |            |       |      |          |           |
| 4142     | 34       |            |       |      |          |           |
| 4143     | 34       |            |       |      |          |           |



| Ereignis | Aufnahme | DAPI/CK-PE                                                                          | CK-PE                                                                               | DAPI                                                                                 | CD45-APC                                                                              | HER-2/neu                                                                             |
|----------|----------|-------------------------------------------------------------------------------------|-------------------------------------------------------------------------------------|--------------------------------------------------------------------------------------|---------------------------------------------------------------------------------------|---------------------------------------------------------------------------------------|
| 4144     | 34       |    |    |    |    |    |
| 4145     | 34       |    |    |    |    |    |
| 4146     | 34       |    |    |    |    |    |
| 4147     | 34       |    |    |    |    |    |
| 4148     | 34       |    |    |    |    |    |
| 4149     | 34       |   |   |   |   |   |
| 4150     | 34       |  |  |  |  |  |
| 4151     | 34       |  |  |  |  |  |
| 4152     | 34       |  |  |  |  |  |
| 4153     | 34       |  |  |  |  |  |
| 4154     | 34       |  |  |  |  |  |
| 4155     | 34       |  |  |  |  |  |
| 4156     | 34       |  |  |  |  |  |



| Ereignis | Aufnahme | DAPI/CK-PE | CK-PE | DAPI | CD45-APC | HER-2/neu |
|----------|----------|------------|-------|------|----------|-----------|
| 4157     | 34       |            |       |      |          |           |
| 4158     | 34       |            |       |      |          |           |
| 4159     | 34       |            |       |      |          |           |
| 4160     | 34       |            |       |      |          |           |
| 4161     | 34       |            |       |      |          |           |
| 4162     | 34       |            |       |      |          |           |
| 4163     | 34       |            |       |      |          |           |
| 4164     | 34       |            |       |      |          |           |
| 4165     | 34       |            |       |      |          |           |
| 4166     | 34       |            |       |      |          |           |
| 4167     | 34       |            |       |      |          |           |
| 4168     | 34       |            |       |      |          |           |

| Ereignis | Aufnahme | DAPI/CK-PE | CK-PE | DAPI | CD45-APC | HER-2/neu |
|----------|----------|------------|-------|------|----------|-----------|
| 4169     | 34       |            |       |      |          |           |
| 4170     | 34       |            |       |      |          |           |
| 4171     | 34       |            |       |      |          |           |
| 4172     | 34       |            |       |      |          |           |
| 4173     | 34       |            |       |      |          |           |
| 4174     | 34       |            |       |      |          |           |
| 4175     | 34       |            |       |      |          |           |
| 4176     | 34       |            |       |      |          |           |
| 4177     | 34       |            |       |      |          |           |
| 4178     | 34       |            |       |      |          |           |
| 4179     | 34       |            |       |      |          |           |
| 4180     | 34       |            |       |      |          |           |
| 4181     | 34       |            |       |      |          |           |



| Ereignis | Aufnahme | DAPI/CK-PE | CK-PE | DAPI | CD45-APC | HER-2/neu |
|----------|----------|------------|-------|------|----------|-----------|
| 4182     | 34       |            |       |      |          |           |
| 4183     | 34       |            |       |      |          |           |
| 4184     | 34       |            |       |      |          |           |
| 4185     | 34       |            |       |      |          |           |
| 4186     | 34       |            |       |      |          |           |
| 4187     | 34       |            |       |      |          |           |
| 4188     | 34       |            |       |      |          |           |
| 4189     | 34       |            |       |      |          |           |
| 4190     | 34       |            |       |      |          |           |
| 4191     | 34       |            |       |      |          |           |
| 4192     | 34       |            |       |      |          |           |
| 4193     | 34       |            |       |      |          |           |
| 4194     | 34       |            |       |      |          |           |

| Ereignis                                                                                 | Aufnahme | DAPI/CK-PE | CK-PE | DAPI | CD45-APC | HER-2/neu |
|------------------------------------------------------------------------------------------|----------|------------|-------|------|----------|-----------|
| 4195                                                                                     | 34       |            |       |      |          |           |
| 4196                                                                                     | 34       |            |       |      |          |           |
| 4197                                                                                     | 34       |            |       |      |          |           |
| 4198                                                                                     | 34       |            |       |      |          |           |
| 4199                                                                                     | 34       |            |       |      |          |           |
| 4200                                                                                     | 34       |            |       |      |          |           |
| 4201                                                                                     | 34       |            |       |      |          |           |
| 4202                                                                                     | 34       |            |       |      |          |           |
| 4203                                                                                     | 34       |            |       |      |          |           |
| 4204                                                                                     | 34       |            |       |      |          |           |
|  4205 | 34       |            |       |      |          |           |
| 4206                                                                                     | 34       |            |       |      |          |           |



| Ereignis | Aufnahme | DAPI/CK-PE | CK-PE | DAPI | CD45-APC | HER-2/neu |
|----------|----------|------------|-------|------|----------|-----------|
| 4207     | 34       |            |       |      |          |           |
| 4208     | 34       |            |       |      |          |           |
| 4209     | 34       |            |       |      |          |           |
| 4210     | 34       |            |       |      |          |           |
| 4211     | 34       |            |       |      |          |           |
| 4212     | 34       |            |       |      |          |           |
| 4213     | 34       |            |       |      |          |           |
| 4214     | 34       |            |       |      |          |           |
| 4215     | 34       |            |       |      |          |           |
| 4216     | 34       |            |       |      |          |           |
| 4217     | 34       |            |       |      |          |           |
| 4218     | 34       |            |       |      |          |           |
| 4219     | 34       |            |       |      |          |           |

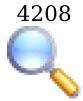

| Ereignis                                                                                 | Aufnahme | DAPI/CK-PE | CK-PE | DAPI | CD45-APC | HER-2/neu |
|------------------------------------------------------------------------------------------|----------|------------|-------|------|----------|-----------|
| 4220                                                                                     | 34       |            |       |      |          |           |
|  4221   | 34       |            |       |      |          |           |
| 4222                                                                                     | 34       |            |       |      |          |           |
| 4223                                                                                     | 34       |            |       |      |          |           |
|  4224  | 34       |            |       |      |          |           |
| 4225                                                                                     | 34       |            |       |      |          |           |
| 4226                                                                                     | 34       |            |       |      |          |           |
| 4227                                                                                     | 34       |            |       |      |          |           |
|  4228 | 34       |            |       |      |          |           |
| 4229                                                                                     | 34       |            |       |      |          |           |
| 4230                                                                                     | 34       |            |       |      |          |           |



| Ereignis | Aufnahme | DAPI/CK-PE | CK-PE | DAPI | CD45-APC | HER-2/neu |
|----------|----------|------------|-------|------|----------|-----------|
| 4231     | 34       |            |       |      |          |           |
| 4232     | 34       |            |       |      |          |           |
| 4233     | 34       |            |       |      |          |           |
| 4234     | 34       |            |       |      |          |           |
| 4235     | 34       |            |       |      |          |           |
| 4236     | 34       |            |       |      |          |           |
| 4237     | 34       |            |       |      |          |           |
| 4238     | 34       |            |       |      |          |           |
| 4239     | 34       |            |       |      |          |           |
| 4240     | 34       |            |       |      |          |           |
| 4241     | 34       |            |       |      |          |           |
| 4242     | 34       |            |       |      |          |           |

| Ereignis | Aufnahme | DAPI/CK-PE | CK-PE | DAPI | CD45-APC | HER-2/neu |
|----------|----------|------------|-------|------|----------|-----------|
| 4243     | 33       |            |       |      |          |           |
| 4244     | 33       |            |       |      |          |           |
| 4245     | 33       |            |       |      |          |           |
| 4246     | 35       |            |       |      |          |           |
| 4247     | 35       |            |       |      |          |           |
| 4248     | 35       |            |       |      |          |           |
| 4249     | 35       |            |       |      |          |           |
| 4250     | 35       |            |       |      |          |           |
| 4251     | 35       |            |       |      |          |           |
| 4252     | 35       |            |       |      |          |           |
| 4253     | 35       |            |       |      |          |           |



| Ereignis | Aufnahme | DAPI/CK-PE | CK-PE | DAPI | CD45-APC | HER-2/neu |
|----------|----------|------------|-------|------|----------|-----------|
| 4254     | 35       |            |       |      |          |           |
| 4255     | 35       |            |       |      |          |           |
| 4256     | 35       |            |       |      |          |           |
| 4257     | 35       |            |       |      |          |           |
| 4258     | 35       |            |       |      |          |           |
| 4259     | 35       |            |       |      |          |           |
| 4260     | 35       |            |       |      |          |           |
| 4261     | 35       |            |       |      |          |           |
| 4262     | 35       |            |       |      |          |           |
| 4263     | 34       |            |       |      |          |           |
| 4264     | 34       |            |       |      |          |           |
| 4265     | 34       |            |       |      |          |           |

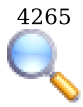

| Ereignis | Aufnahme | DAPI/CK-PE | CK-PE | DAPI | CD45-APC | HER-2/neu |
|----------|----------|------------|-------|------|----------|-----------|
| 4266     | 36       |            |       |      |          |           |
| 4267     | 36       |            |       |      |          |           |
| 4268     | 36       |            |       |      |          |           |
| 4269     | 36       |            |       |      |          |           |
| 4270     | 36       |            |       |      |          |           |
| 4271     | 36       |            |       |      |          |           |
| 4272     | 36       |            |       |      |          |           |
| 4273     | 36       |            |       |      |          |           |
| 4274     | 36       |            |       |      |          |           |
| 4275     | 36       |            |       |      |          |           |
| 4276     | 36       |            |       |      |          |           |
| 4277     | 36       |            |       |      |          |           |
| 4278     | 36       |            |       |      |          |           |



| Ereignis | Aufnahme | DAPI/CK-PE | CK-PE | DAPI | CD45-APC | HER-2/neu |
|----------|----------|------------|-------|------|----------|-----------|
| 4279     | 36       |            |       |      |          |           |
| 4280     | 36       |            |       |      |          |           |
| 4281     | 36       |            |       |      |          |           |
| 4282     | 36       |            |       |      |          |           |
| 4283     | 36       |            |       |      |          |           |
| 4284     | 36       |            |       |      |          |           |
| 4285     | 36       |            |       |      |          |           |
| 4286     | 36       |            |       |      |          |           |
| 4287     | 36       |            |       |      |          |           |
| 4288     | 36       |            |       |      |          |           |
| 4289     | 36       |            |       |      |          |           |
| 4290     | 36       |            |       |      |          |           |

| Ereignis | Aufnahme | DAPI/CK-PE | CK-PE | DAPI | CD45-APC | HER-2/neu |
|----------|----------|------------|-------|------|----------|-----------|
| 4291     | 36       |            |       |      |          |           |
| 4292     | 36       |            |       |      |          |           |
| 4293     | 36       |            |       |      |          |           |
| 4294     | 36       |            |       |      |          |           |
| 4295     | 36       |            |       |      |          |           |
| 4296     | 36       |            |       |      |          |           |
| 4297     | 36       |            |       |      |          |           |
| 4298     | 36       |            |       |      |          |           |
| 4299     | 36       |            |       |      |          |           |
| 4300     | 36       |            |       |      |          |           |
| 4301     | 36       |            |       |      |          |           |
| 4302     | 36       |            |       |      |          |           |



| Ereignis | Aufnahme | DAPI/CK-PE | CK-PE | DAPI | CD45-APC | HER-2/neu |
|----------|----------|------------|-------|------|----------|-----------|
| 4303     | 36       |            |       |      |          |           |
| 4304     | 36       |            |       |      |          |           |
| 4305     | 36       |            |       |      |          |           |
| 4306     | 36       |            |       |      |          |           |
| 4307     | 36       |            |       |      |          |           |
| 4308     | 36       |            |       |      |          |           |
| 4309     | 36       |            |       |      |          |           |
| 4310     | 36       |            |       |      |          |           |
| 4311     | 36       |            |       |      |          |           |
| 4312     | 36       |            |       |      |          |           |
| 4313     | 36       |            |       |      |          |           |

| Ereignis | Aufnahme | DAPI/CK-PE | CK-PE | DAPI | CD45-APC | HER-2/neu |
|----------|----------|------------|-------|------|----------|-----------|
| 4314     | 36       |            |       |      |          |           |
| 4315     | 36       |            |       |      |          |           |
| 4316     | 36       |            |       |      |          |           |
| 4317     | 36       |            |       |      |          |           |
| 4318     | 36       |            |       |      |          |           |
| 4319     | 36       |            |       |      |          |           |
| 4320     | 35       |            |       |      |          |           |
| 4321     | 37       |            |       |      |          |           |
| 4322     | 37       |            |       |      |          |           |
| 4323     | 37       |            |       |      |          |           |
| 4324     | 37       |            |       |      |          |           |



| Ereignis | Aufnahme | DAPI/CK-PE | CK-PE | DAPI | CD45-APC | HER-2/neu |
|----------|----------|------------|-------|------|----------|-----------|
| 4325     | 37       |            |       |      |          |           |
| 4326     | 37       |            |       |      |          |           |
| 4327     | 37       |            |       |      |          |           |
| 4328     | 37       |            |       |      |          |           |
| 4329     | 37       |            |       |      |          |           |
| 4330     | 37       |            |       |      |          |           |
| 4331     | 37       |            |       |      |          |           |
| 4332     | 37       |            |       |      |          |           |
| 4333     | 37       |            |       |      |          |           |
| 4334     | 37       |            |       |      |          |           |
| 4335     | 37       |            |       |      |          |           |
| 4336     | 37       |            |       |      |          |           |

| Ereignis | Aufnahme | DAPI/CK-PE | CK-PE | DAPI | CD45-APC | HER-2/neu |
|----------|----------|------------|-------|------|----------|-----------|
| 4337     | 37       |            |       |      |          |           |
| 4338     | 37       |            |       |      |          |           |
| 4339     | 37       |            |       |      |          |           |
| 4340     | 37       |            |       |      |          |           |
| 4341     | 37       |            |       |      |          |           |
| 4342     | 37       |            |       |      |          |           |
| 4343     | 37       |            |       |      |          |           |
| 4344     | 37       |            |       |      |          |           |
| 4345     | 37       |            |       |      |          |           |
| 4346     | 37       |            |       |      |          |           |
| 4347     | 37       |            |       |      |          |           |
| 4348     | 37       |            |       |      |          |           |



| Ereignis                                                                                 | Aufnahme | DAPI/CK-PE                                                                          | CK-PE                                                                               | DAPI                                                                                 | CD45-APC                                                                              | HER-2/neu                                                                             |
|------------------------------------------------------------------------------------------|----------|-------------------------------------------------------------------------------------|-------------------------------------------------------------------------------------|--------------------------------------------------------------------------------------|---------------------------------------------------------------------------------------|---------------------------------------------------------------------------------------|
| 4349    | 37       |    |    |    |    |    |
| 4350                                                                                     | 37       |    |    |    |    |    |
| 4351                                                                                     | 37       |    |    |    |    |    |
| 4352                                                                                     | 37       |    |    |    |    |    |
| 4353                                                                                     | 37       |    |    |    |    |    |
| 4354  | 37       |   |   |   |   |   |
| 4355                                                                                     | 37       |  |  |  |  |  |
| 4356                                                                                     | 37       |  |  |  |  |  |
| 4357                                                                                     | 37       |  |  |  |  |  |
| 4358                                                                                     | 37       |  |  |  |  |  |
| 4359                                                                                     | 37       |  |  |  |  |  |
| 4360                                                                                     | 37       |  |  |  |  |  |

| Ereignis                                                                                 | Aufnahme | DAPI/CK-PE | CK-PE | DAPI | CD45-APC | HER-2/neu |
|------------------------------------------------------------------------------------------|----------|------------|-------|------|----------|-----------|
| 4361                                                                                     | 37       |            |       |      |          |           |
| 4362                                                                                     | 37       |            |       |      |          |           |
| 4363                                                                                     | 37       |            |       |      |          |           |
|  4364   | 37       |            |       |      |          |           |
| 4365                                                                                     | 37       |            |       |      |          |           |
| 4366                                                                                     | 37       |            |       |      |          |           |
|  4367 | 37       |            |       |      |          |           |
| 4368                                                                                     | 37       |            |       |      |          |           |
| 4369                                                                                     | 37       |            |       |      |          |           |
| 4370                                                                                     | 37       |            |       |      |          |           |



| Ereignis | Aufnahme | DAPI/CK-PE | CK-PE | DAPI | CD45-APC | HER-2/neu |
|----------|----------|------------|-------|------|----------|-----------|
| 4371     | 37       |            |       |      |          |           |
| 4372     | 37       |            |       |      |          |           |
| 4373     | 37       |            |       |      |          |           |
| 4374     | 37       |            |       |      |          |           |
| 4375     | 37       |            |       |      |          |           |
| 4376     | 37       |            |       |      |          |           |
| 4377     | 37       |            |       |      |          |           |
| 4378     | 37       |            |       |      |          |           |
| 4379     | 37       |            |       |      |          |           |
| 4380     | 37       |            |       |      |          |           |
| 4381     | 37       |            |       |      |          |           |
| 4382     | 37       |            |       |      |          |           |

| Ereignis                                                                                 | Aufnahme | DAPI/CK-PE | CK-PE | DAPI | CD45-APC | HER-2/neu |
|------------------------------------------------------------------------------------------|----------|------------|-------|------|----------|-----------|
| 4383                                                                                     | 37       |            |       |      |          |           |
| 4384                                                                                     | 37       |            |       |      |          |           |
| 4385                                                                                     | 37       |            |       |      |          |           |
| 4386                                                                                     | 37       |            |       |      |          |           |
| 4387                                                                                     | 37       |            |       |      |          |           |
| 4388                                                                                     | 37       |            |       |      |          |           |
| 4389                                                                                     | 37       |            |       |      |          |           |
| 4390                                                                                     | 37       |            |       |      |          |           |
| 4391                                                                                     | 37       |            |       |      |          |           |
| 4392                                                                                     | 37       |            |       |      |          |           |
|  4393 | 37       |            |       |      |          |           |
|  4394 | 37       |            |       |      |          |           |



| Ereignis | Aufnahme | DAPI/CK-PE | CK-PE | DAPI | CD45-APC | HER-2/neu |
|----------|----------|------------|-------|------|----------|-----------|
| 4395     | 37       |            |       |      |          |           |
| 4396     | 37       |            |       |      |          |           |
| 4397     | 37       |            |       |      |          |           |
| 4398     | 37       |            |       |      |          |           |
| 4399     | 37       |            |       |      |          |           |
| 4400     | 37       |            |       |      |          |           |
| 4401     | 37       |            |       |      |          |           |
| 4402     | 37       |            |       |      |          |           |
| 4403     | 37       |            |       |      |          |           |
| 4404     | 37       |            |       |      |          |           |
| 4405     | 37       |            |       |      |          |           |
| 4406     | 37       |            |       |      |          |           |

| Ereignis                                                                                 | Aufnahme | DAPI/CK-PE | CK-PE | DAPI | CD45-APC | HER-2/neu |
|------------------------------------------------------------------------------------------|----------|------------|-------|------|----------|-----------|
| 4407                                                                                     | 37       |            |       |      |          |           |
| 4408                                                                                     | 37       |            |       |      |          |           |
| 4409                                                                                     | 37       |            |       |      |          |           |
| 4410                                                                                     | 37       |            |       |      |          |           |
| 4411                                                                                     | 37       |            |       |      |          |           |
| 4412                                                                                     | 37       |            |       |      |          |           |
| 4413                                                                                     | 37       |            |       |      |          |           |
| 4414                                                                                     | 37       |            |       |      |          |           |
| 4415                                                                                     | 37       |            |       |      |          |           |
|  4416 | 37       |            |       |      |          |           |
| 4417                                                                                     | 37       |            |       |      |          |           |
| 4418                                                                                     | 37       |            |       |      |          |           |
| 4419                                                                                     | 37       |            |       |      |          |           |



| Ereignis | Aufnahme | DAPI/CK-PE | CK-PE | DAPI | CD45-APC | HER-2/neu |
|----------|----------|------------|-------|------|----------|-----------|
| 4420     | 37       |            |       |      |          |           |
| 4421     | 37       |            |       |      |          |           |
| 4422     | 37       |            |       |      |          |           |
| 4423     | 37       |            |       |      |          |           |
| 4424     | 37       |            |       |      |          |           |
| 4425     | 37       |            |       |      |          |           |
| 4426     | 37       |            |       |      |          |           |
| 4427     | 37       |            |       |      |          |           |
| 4428     | 37       |            |       |      |          |           |
| 4429     | 37       |            |       |      |          |           |
| 4430     | 37       |            |       |      |          |           |

| Ereignis | Aufnahme | DAPI/CK-PE | CK-PE | DAPI | CD45-APC | HER-2/neu |
|----------|----------|------------|-------|------|----------|-----------|
| 4431     | 37       |            |       |      |          |           |
| 4432     | 37       |            |       |      |          |           |
| 4433     | 37       |            |       |      |          |           |
| 4434     | 37       |            |       |      |          |           |
| 4435     | 37       |            |       |      |          |           |
| 4436     | 37       |            |       |      |          |           |
| 4437     | 37       |            |       |      |          |           |
| 4438     | 37       |            |       |      |          |           |
| 4439     | 37       |            |       |      |          |           |
| 4440     | 37       |            |       |      |          |           |
| 4441     | 37       |            |       |      |          |           |
| 4442     | 37       |            |       |      |          |           |

| Ereignis                                                                               | Aufnahme | DAPI/CK-PE | CK-PE | DAPI | CD45-APC | HER-2/neu |
|----------------------------------------------------------------------------------------|----------|------------|-------|------|----------|-----------|
| 4443                                                                                   | 37       |            |       |      |          |           |
| 4444                                                                                   | 37       |            |       |      |          |           |
| 4445                                                                                   | 37       |            |       |      |          |           |
|  4446 | 37       |            |       |      |          |           |
| 4447                                                                                   | 37       |            |       |      |          |           |
| 4448                                                                                   | 37       |            |       |      |          |           |
| 4449                                                                                   | 37       |            |       |      |          |           |
| 4450                                                                                   | 37       |            |       |      |          |           |
| 4451                                                                                   | 37       |            |       |      |          |           |
| 4452                                                                                   | 37       |            |       |      |          |           |
| 4453                                                                                   | 37       |            |       |      |          |           |
| 4454                                                                                   | 37       |            |       |      |          |           |



| Ereignis | Aufnahme | DAPI/CK-PE | CK-PE | DAPI | CD45-APC | HER-2/neu |
|----------|----------|------------|-------|------|----------|-----------|
| 4455     | 37       |            |       |      |          |           |
| 4456     | 37       |            |       |      |          |           |
| 4457     | 37       |            |       |      |          |           |
| 4458     | 37       |            |       |      |          |           |
| 4459     | 37       |            |       |      |          |           |
| 4460     | 37       |            |       |      |          |           |
| 4461     | 37       |            |       |      |          |           |
| 4462     | 37       |            |       |      |          |           |
| 4463     | 37       |            |       |      |          |           |
| 4464     | 37       |            |       |      |          |           |
| 4465     | 37       |            |       |      |          |           |
| 4466     | 37       |            |       |      |          |           |

| Ereignis                                                                                 | Aufnahme | DAPI/CK-PE | CK-PE | DAPI | CD45-APC | HER-2/neu |
|------------------------------------------------------------------------------------------|----------|------------|-------|------|----------|-----------|
| 4467                                                                                     | 37       |            |       |      |          |           |
| 4468                                                                                     | 37       |            |       |      |          |           |
| 4469                                                                                     | 37       |            |       |      |          |           |
| 4470                                                                                     | 37       |            |       |      |          |           |
| 4471                                                                                     | 37       |            |       |      |          |           |
| 4472                                                                                     | 37       |            |       |      |          |           |
| 4473                                                                                     | 37       |            |       |      |          |           |
| 4474                                                                                     | 37       |            |       |      |          |           |
| 4475                                                                                     | 37       |            |       |      |          |           |
|  4476 | 37       |            |       |      |          |           |
| 4477                                                                                     | 37       |            |       |      |          |           |
| 4478                                                                                     | 37       |            |       |      |          |           |

| Ereignis | Aufnahme | DAPI/CK-PE | CK-PE | DAPI | CD45-APC | HER-2/neu |
|----------|----------|------------|-------|------|----------|-----------|
| 4479     | 37       |            |       |      |          |           |
| 4480     | 37       |            |       |      |          |           |
| 4481     | 37       |            |       |      |          |           |
| 4482     | 37       |            |       |      |          |           |
| 4483     | 37       |            |       |      |          |           |
| 4484     | 37       |            |       |      |          |           |
| 4485     | 37       |            |       |      |          |           |
| 4486     | 37       |            |       |      |          |           |
| 4487     | 37       |            |       |      |          |           |
| 4488     | 37       |            |       |      |          |           |
| 4489     | 37       |            |       |      |          |           |
| 4490     | 37       |            |       |      |          |           |
| 4491     | 37       |            |       |      |          |           |



| Ereignis | Aufnahme | DAPI/CK-PE | CK-PE | DAPI | CD45-APC | HER-2/neu |
|----------|----------|------------|-------|------|----------|-----------|
| 4492     | 37       |            |       |      |          |           |
| 4493     | 37       |            |       |      |          |           |
| 4494     | 37       |            |       |      |          |           |
| 4495     | 37       |            |       |      |          |           |
| 4496     | 37       |            |       |      |          |           |
| 4497     | 37       |            |       |      |          |           |
| 4498     | 37       |            |       |      |          |           |
| 4499     | 37       |            |       |      |          |           |
| 4500     | 37       |            |       |      |          |           |
| 4501     | 37       |            |       |      |          |           |
| 4502     | 37       |            |       |      |          |           |
| 4503     | 37       |            |       |      |          |           |

| Ereignis                                                                                 | Aufnahme | DAPI/CK-PE | CK-PE | DAPI | CD45-APC | HER-2/neu |
|------------------------------------------------------------------------------------------|----------|------------|-------|------|----------|-----------|
| 4504                                                                                     | 37       |            |       |      |          |           |
| 4505                                                                                     | 37       |            |       |      |          |           |
| 4506                                                                                     | 37       |            |       |      |          |           |
|  4507   | 37       |            |       |      |          |           |
| 4508                                                                                     | 37       |            |       |      |          |           |
| 4509                                                                                     | 37       |            |       |      |          |           |
| 4510                                                                                     | 37       |            |       |      |          |           |
| 4511                                                                                     | 37       |            |       |      |          |           |
| 4512                                                                                     | 37       |            |       |      |          |           |
| 4513                                                                                     | 37       |            |       |      |          |           |
|  4514 | 36       |            |       |      |          |           |
| 4515                                                                                     | 37       |            |       |      |          |           |

| Ereignis | Aufnahme | DAPI/CK-PE | CK-PE | DAPI | CD45-APC | HER-2/neu |
|----------|----------|------------|-------|------|----------|-----------|
| 4516     | 37       |            |       |      |          |           |
| 4517     | 36       |            |       |      |          |           |
| 4518     | 34       |            |       |      |          |           |
| 4519     | 37       |            |       |      |          |           |
| 4520     | 38       |            |       |      |          |           |
| 4521     | 38       |            |       |      |          |           |
| 4522     | 38       |            |       |      |          |           |
| 4523     | 38       |            |       |      |          |           |
| 4524     | 38       |            |       |      |          |           |
| 4525     | 38       |            |       |      |          |           |
| 4526     | 38       |            |       |      |          |           |



| Ereignis | Aufnahme | DAPI/CK-PE | CK-PE | DAPI | CD45-APC | HER-2/neu |
|----------|----------|------------|-------|------|----------|-----------|
| 4527     | 38       |            |       |      |          |           |
| 4528     | 38       |            |       |      |          |           |
| 4529     | 38       |            |       |      |          |           |
| 4530     | 38       |            |       |      |          |           |
| 4531     | 38       |            |       |      |          |           |
| 4532     | 38       |            |       |      |          |           |
| 4533     | 38       |            |       |      |          |           |
| 4534     | 38       |            |       |      |          |           |
| 4535     | 38       |            |       |      |          |           |
| 4536     | 38       |            |       |      |          |           |
| 4537     | 38       |            |       |      |          |           |

| Ereignis | Aufnahme | DAPI/CK-PE | CK-PE | DAPI | CD45-APC | HER-2/neu |
|----------|----------|------------|-------|------|----------|-----------|
| 4538     | 38       |            |       |      |          |           |
| 4539     | 38       |            |       |      |          |           |
| 4540     | 38       |            |       |      |          |           |
| 4541     | 38       |            |       |      |          |           |
| 4542     | 38       |            |       |      |          |           |
| 4543     | 38       |            |       |      |          |           |
| 4544     | 38       |            |       |      |          |           |
| 4545     | 38       |            |       |      |          |           |
| 4546     | 38       |            |       |      |          |           |
| 4547     | 38       |            |       |      |          |           |
| 4548     | 38       |            |       |      |          |           |
| 4549     | 38       |            |       |      |          |           |
| 4550     | 38       |            |       |      |          |           |



| Ereignis | Aufnahme | DAPI/CK-PE | CK-PE | DAPI | CD45-APC | HER-2/neu |
|----------|----------|------------|-------|------|----------|-----------|
| 4551     | 38       |            |       |      |          |           |
| 4552     | 38       |            |       |      |          |           |
| 4553     | 38       |            |       |      |          |           |
| 4554     | 38       |            |       |      |          |           |
| 4555     | 38       |            |       |      |          |           |
| 4556     | 38       |            |       |      |          |           |
| 4557     | 38       |            |       |      |          |           |
| 4558     | 38       |            |       |      |          |           |
| 4559     | 38       |            |       |      |          |           |
| 4560     | 38       |            |       |      |          |           |



| Ereignis | Aufnahme | DAPI/CK-PE | CK-PE | DAPI | CD45-APC | HER-2/neu |
|----------|----------|------------|-------|------|----------|-----------|
| 4561     | 38       |            |       |      |          |           |
| 4562     | 38       |            |       |      |          |           |
| 4563     | 38       |            |       |      |          |           |
| 4564     | 38       |            |       |      |          |           |
| 4565     | 38       |            |       |      |          |           |
| 4566     | 38       |            |       |      |          |           |
| 4567     | 38       |            |       |      |          |           |
| 4568     | 38       |            |       |      |          |           |
| 4569     | 38       |            |       |      |          |           |
| 4570     | 38       |            |       |      |          |           |
| 4571     | 38       |            |       |      |          |           |
| 4572     | 38       |            |       |      |          |           |

| Ereignis | Aufnahme | DAPI/CK-PE | CK-PE | DAPI | CD45-APC | HER-2/neu |
|----------|----------|------------|-------|------|----------|-----------|
| 4573     | 38       |            |       |      |          |           |
| 4574     | 38       |            |       |      |          |           |
| 4575     | 38       |            |       |      |          |           |
| 4576     | 38       |            |       |      |          |           |
| 4577     | 38       |            |       |      |          |           |
| 4578     | 38       |            |       |      |          |           |
| 4579     | 38       |            |       |      |          |           |
| 4580     | 38       |            |       |      |          |           |
| 4581     | 38       |            |       |      |          |           |
| 4582     | 38       |            |       |      |          |           |
| 4583     | 38       |            |       |      |          |           |

| Ereignis | Aufnahme | DAPI/CK-PE | CK-PE | DAPI | CD45-APC | HER-2/neu |
|----------|----------|------------|-------|------|----------|-----------|
| 4584     | 38       |            |       |      |          |           |
| 4585     | 38       |            |       |      |          |           |
| 4586     | 38       |            |       |      |          |           |
| 4587     | 38       |            |       |      |          |           |
| 4588     | 38       |            |       |      |          |           |
| 4589     | 38       |            |       |      |          |           |
| 4590     | 38       |            |       |      |          |           |
| 4591     | 38       |            |       |      |          |           |
| 4592     | 38       |            |       |      |          |           |
| 4593     | 38       |            |       |      |          |           |
| 4594     | 38       |            |       |      |          |           |
| 4595     | 38       |            |       |      |          |           |



| Ereignis | Aufnahme | DAPI/CK-PE | CK-PE | DAPI | CD45-APC | HER-2/neu |
|----------|----------|------------|-------|------|----------|-----------|
| 4596     | 38       |            |       |      |          |           |
| 4597     | 38       |            |       |      |          |           |
| 4598     | 38       |            |       |      |          |           |
| 4599     | 38       |            |       |      |          |           |
| 4600     | 38       |            |       |      |          |           |
| 4601     | 38       |            |       |      |          |           |
| 4602     | 38       |            |       |      |          |           |
| 4603     | 38       |            |       |      |          |           |
| 4604     | 38       |            |       |      |          |           |
| 4605     | 38       |            |       |      |          |           |
| 4606     | 38       |            |       |      |          |           |
| 4607     | 38       |            |       |      |          |           |

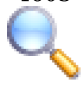

| Ereignis | Aufnahme | DAPI/CK-PE                                                                          | CK-PE                                                                               | DAPI                                                                                 | CD45-APC                                                                              | HER-2/neu                                                                             |
|----------|----------|-------------------------------------------------------------------------------------|-------------------------------------------------------------------------------------|--------------------------------------------------------------------------------------|---------------------------------------------------------------------------------------|---------------------------------------------------------------------------------------|
| 4608     | 38       |    |    |    |    |    |
| 4609     | 38       |    |    |    |    |    |
| 4610     | 38       |    |    |    |    |    |
| 4611     | 38       |    |    |    |    |    |
| 4612     | 38       |    |    |    |    |    |
| 4613     | 38       |   |   |   |   |   |
| 4614     | 38       |  |  |  |  |  |
| 4615     | 38       |  |  |  |  |  |
| 4616     | 38       |  |  |  |  |  |
| 4617     | 38       |  |  |  |  |  |
| 4618     | 38       |  |  |  |  |  |
| 4619     | 38       |  |  |  |  |  |

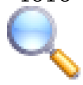

| Ereignis | Aufnahme | DAPI/CK-PE | CK-PE | DAPI | CD45-APC | HER-2/neu |
|----------|----------|------------|-------|------|----------|-----------|
| 4620     | 38       |            |       |      |          |           |
| 4621     | 38       |            |       |      |          |           |
| 4622     | 38       |            |       |      |          |           |
| 4623     | 38       |            |       |      |          |           |
| 4624     | 38       |            |       |      |          |           |
| 4625     | 38       |            |       |      |          |           |
| 4626     | 38       |            |       |      |          |           |
| 4627     | 38       |            |       |      |          |           |
| 4628     | 38       |            |       |      |          |           |
| 4629     | 38       |            |       |      |          |           |
| 4630     | 38       |            |       |      |          |           |
| 4631     | 38       |            |       |      |          |           |

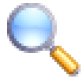



| Ereignis | Aufnahme | DAPI/CK-PE | CK-PE | DAPI | CD45-APC | HER-2/neu |
|----------|----------|------------|-------|------|----------|-----------|
| 4632     | 38       |            |       |      |          |           |
| 4633     | 38       |            |       |      |          |           |
| 4634     | 38       |            |       |      |          |           |
| 4635     | 38       |            |       |      |          |           |
| 4636     | 38       |            |       |      |          |           |
| 4637     | 38       |            |       |      |          |           |
| 4638     | 38       |            |       |      |          |           |
| 4639     | 38       |            |       |      |          |           |
| 4640     | 38       |            |       |      |          |           |
| 4641     | 38       |            |       |      |          |           |
| 4642     | 38       |            |       |      |          |           |
| 4643     | 38       |            |       |      |          |           |

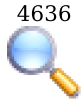

| Ereignis | Aufnahme | DAPI/CK-PE | CK-PE | DAPI | CD45-APC | HER-2/neu |
|----------|----------|------------|-------|------|----------|-----------|
| 4644     | 38       |            |       |      |          |           |
| 4645     | 38       |            |       |      |          |           |
| 4646     | 38       |            |       |      |          |           |
| 4647     | 38       |            |       |      |          |           |
| 4648     | 38       |            |       |      |          |           |
| 4649     | 38       |            |       |      |          |           |
| 4650     | 38       |            |       |      |          |           |
| 4651     | 38       |            |       |      |          |           |
| 4652     | 38       |            |       |      |          |           |
| 4653     | 38       |            |       |      |          |           |

| Ereignis | Aufnahme | DAPI/CK-PE | CK-PE | DAPI | CD45-APC | HER-2/neu |
|----------|----------|------------|-------|------|----------|-----------|
| 4654     | 38       |            |       |      |          |           |
| 4655     | 38       |            |       |      |          |           |
| 4656     | 38       |            |       |      |          |           |
| 4657     | 38       |            |       |      |          |           |
| 4658     | 38       |            |       |      |          |           |
| 4659     | 38       |            |       |      |          |           |
| 4660     | 38       |            |       |      |          |           |
| 4661     | 38       |            |       |      |          |           |
| 4662     | 38       |            |       |      |          |           |
| 4663     | 38       |            |       |      |          |           |
| 4664     | 38       |            |       |      |          |           |
| 4665     | 38       |            |       |      |          |           |
| 4666     | 38       |            |       |      |          |           |
| 4667     | 38       |            |       |      |          |           |



| Ereignis | Aufnahme | DAPI/CK-PE | CK-PE | DAPI | CD45-APC | HER-2/neu |
|----------|----------|------------|-------|------|----------|-----------|
| 4668     | 38       |            |       |      |          |           |
| 4669     | 38       |            |       |      |          |           |
| 4670     | 38       |            |       |      |          |           |
| 4671     | 38       |            |       |      |          |           |
| 4672     | 38       |            |       |      |          |           |
| 4673     | 38       |            |       |      |          |           |
| 4674     | 38       |            |       |      |          |           |
| 4675     | 38       |            |       |      |          |           |
| 4676     | 38       |            |       |      |          |           |
| 4677     | 38       |            |       |      |          |           |
| 4678     | 38       |            |       |      |          |           |

| Ereignis | Aufnahme | DAPI/CK-PE | CK-PE | DAPI | CD45-APC | HER-2/neu |
|----------|----------|------------|-------|------|----------|-----------|
| 4679     | 38       |            |       |      |          |           |
| 4680     | 38       |            |       |      |          |           |
| 4681     | 38       |            |       |      |          |           |
| 4682     | 38       |            |       |      |          |           |
| 4683     | 38       |            |       |      |          |           |
| 4684     | 38       |            |       |      |          |           |
| 4685     | 38       |            |       |      |          |           |
| 4686     | 38       |            |       |      |          |           |
| 4687     | 38       |            |       |      |          |           |
| 4688     | 38       |            |       |      |          |           |
| 4689     | 38       |            |       |      |          |           |
| 4690     | 38       |            |       |      |          |           |
| 4691     | 38       |            |       |      |          |           |

| Ereignis                                                                                 | Aufnahme | DAPI/CK-PE | CK-PE | DAPI | CD45-APC | HER-2/neu |
|------------------------------------------------------------------------------------------|----------|------------|-------|------|----------|-----------|
| 4692                                                                                     | 38       |            |       |      |          |           |
| 4693                                                                                     | 38       |            |       |      |          |           |
| 4694                                                                                     | 38       |            |       |      |          |           |
| 4695                                                                                     | 38       |            |       |      |          |           |
| 4696                                                                                     | 38       |            |       |      |          |           |
| 4697                                                                                     | 38       |            |       |      |          |           |
| 4698                                                                                     | 38       |            |       |      |          |           |
| 4699                                                                                     | 38       |            |       |      |          |           |
| 4700                                                                                     | 38       |            |       |      |          |           |
| 4701                                                                                     | 38       |            |       |      |          |           |
| 4702                                                                                     | 38       |            |       |      |          |           |
| 4703                                                                                     | 38       |            |       |      |          |           |
|  4704 | 38       |            |       |      |          |           |



| Ereignis | Aufnahme | DAPI/CK-PE | CK-PE | DAPI | CD45-APC | HER-2/neu |
|----------|----------|------------|-------|------|----------|-----------|
| 4705     | 38       |            |       |      |          |           |
| 4706     | 38       |            |       |      |          |           |
| 4707     | 38       |            |       |      |          |           |
| 4708     | 38       |            |       |      |          |           |
| 4709     | 38       |            |       |      |          |           |
| 4710     | 38       |            |       |      |          |           |
| 4711     | 38       |            |       |      |          |           |
| 4712     | 38       |            |       |      |          |           |
| 4713     | 33       |            |       |      |          |           |
| 4714     | 38       |            |       |      |          |           |
| 4715     | 38       |            |       |      |          |           |

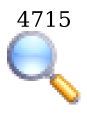

| Ereignis | Aufnahme | DAPI/CK-PE | CK-PE | DAPI | CD45-APC | HER-2/neu |
|----------|----------|------------|-------|------|----------|-----------|
| 4716     | 38       |            |       |      |          |           |
| 4717     | 39       |            |       |      |          |           |
| 4718     | 39       |            |       |      |          |           |
| 4719     | 39       |            |       |      |          |           |
| 4720     | 39       |            |       |      |          |           |
| 4721     | 39       |            |       |      |          |           |
| 4722     | 39       |            |       |      |          |           |
| 4723     | 39       |            |       |      |          |           |
| 4724     | 39       |            |       |      |          |           |
| 4725     | 39       |            |       |      |          |           |
| 4726     | 39       |            |       |      |          |           |

| Ereignis | Aufnahme | DAPI/CK-PE | CK-PE | DAPI | CD45-APC | HER-2/neu |
|----------|----------|------------|-------|------|----------|-----------|
| 4727     | 39       |            |       |      |          |           |
| 4728     | 39       |            |       |      |          |           |
| 4729     | 39       |            |       |      |          |           |
| 4730     | 39       |            |       |      |          |           |
| 4731     | 39       |            |       |      |          |           |
| 4732     | 39       |            |       |      |          |           |
| 4733     | 39       |            |       |      |          |           |
| 4734     | 39       |            |       |      |          |           |
| 4735     | 39       |            |       |      |          |           |
| 4736     | 39       |            |       |      |          |           |
| 4737     | 39       |            |       |      |          |           |
| 4738     | 39       |            |       |      |          |           |
| 4739     | 39       |            |       |      |          |           |



| Ereignis                                                                                 | Aufnahme | DAPI/CK-PE | CK-PE | DAPI | CD45-APC | HER-2/neu |
|------------------------------------------------------------------------------------------|----------|------------|-------|------|----------|-----------|
| 4740                                                                                     | 39       |            |       |      |          |           |
| 4741                                                                                     | 39       |            |       |      |          |           |
| 4742                                                                                     | 39       |            |       |      |          |           |
| 4743                                                                                     | 39       |            |       |      |          |           |
| 4744                                                                                     | 39       |            |       |      |          |           |
| 4745                                                                                     | 39       |            |       |      |          |           |
|  4746 | 39       |            |       |      |          |           |
| 4747                                                                                     | 39       |            |       |      |          |           |
|  4748 | 39       |            |       |      |          |           |
| 4749                                                                                     | 39       |            |       |      |          |           |
| 4750                                                                                     | 39       |            |       |      |          |           |
| 4751                                                                                     | 39       |            |       |      |          |           |

| Ereignis                                                                                 | Aufnahme | DAPI/CK-PE | CK-PE | DAPI | CD45-APC | HER-2/neu |
|------------------------------------------------------------------------------------------|----------|------------|-------|------|----------|-----------|
| 4752                                                                                     | 39       |            |       |      |          |           |
| 4753                                                                                     | 39       |            |       |      |          |           |
| 4754                                                                                     | 39       |            |       |      |          |           |
| 4755                                                                                     | 39       |            |       |      |          |           |
| 4756                                                                                     | 39       |            |       |      |          |           |
| 4757                                                                                     | 39       |            |       |      |          |           |
| 4758                                                                                     | 39       |            |       |      |          |           |
|  4759 | 39       |            |       |      |          |           |
| 4760                                                                                     | 39       |            |       |      |          |           |
| 4761                                                                                     | 39       |            |       |      |          |           |
| 4762                                                                                     | 39       |            |       |      |          |           |
| 4763                                                                                     | 39       |            |       |      |          |           |

| Ereignis | Aufnahme | DAPI/CK-PE | CK-PE | DAPI | CD45-APC | HER-2/neu |
|----------|----------|------------|-------|------|----------|-----------|
| 4764     | 39       |            |       |      |          |           |
| 4765     | 39       |            |       |      |          |           |
| 4766     | 39       |            |       |      |          |           |
| 4767     | 39       |            |       |      |          |           |
| 4768     | 39       |            |       |      |          |           |
| 4769     | 39       |            |       |      |          |           |
| 4770     | 39       |            |       |      |          |           |
| 4771     | 39       |            |       |      |          |           |
| 4772     | 39       |            |       |      |          |           |
| 4773     | 39       |            |       |      |          |           |
| 4774     | 39       |            |       |      |          |           |
| 4775     | 39       |            |       |      |          |           |
| 4776     | 39       |            |       |      |          |           |



| Ereignis                                                                               | Aufnahme | DAPI/CK-PE | CK-PE | DAPI | CD45-APC | HER-2/neu |
|----------------------------------------------------------------------------------------|----------|------------|-------|------|----------|-----------|
| 4777                                                                                   | 39       |            |       |      |          |           |
| 4778                                                                                   | 39       |            |       |      |          |           |
| 4779                                                                                   | 39       |            |       |      |          |           |
|  4780 | 39       |            |       |      |          |           |
| 4781                                                                                   | 39       |            |       |      |          |           |
| 4782                                                                                   | 39       |            |       |      |          |           |
| 4783                                                                                   | 39       |            |       |      |          |           |
| 4784                                                                                   | 39       |            |       |      |          |           |
| 4785                                                                                   | 39       |            |       |      |          |           |
| 4786                                                                                   | 39       |            |       |      |          |           |
| 4787                                                                                   | 39       |            |       |      |          |           |
| 4788                                                                                   | 39       |            |       |      |          |           |

| Ereignis                                                                                 | Aufnahme | DAPI/CK-PE | CK-PE | DAPI | CD45-APC | HER-2/neu |
|------------------------------------------------------------------------------------------|----------|------------|-------|------|----------|-----------|
| 4789    | 39       |            |       |      |          |           |
| 4790                                                                                     | 39       |            |       |      |          |           |
| 4791                                                                                     | 39       |            |       |      |          |           |
| 4792                                                                                     | 39       |            |       |      |          |           |
| 4793                                                                                     | 39       |            |       |      |          |           |
| 4794  | 39       |            |       |      |          |           |
| 4795                                                                                     | 39       |            |       |      |          |           |
| 4796                                                                                     | 39       |            |       |      |          |           |
| 4797                                                                                     | 39       |            |       |      |          |           |
| 4798  | 39       |            |       |      |          |           |
| 4799                                                                                     | 39       |            |       |      |          |           |

| Ereignis | Aufnahme | DAPI/CK-PE | CK-PE | DAPI | CD45-APC | HER-2/neu |
|----------|----------|------------|-------|------|----------|-----------|
| 4800     | 39       |            |       |      |          |           |
| 4801     | 39       |            |       |      |          |           |
| 4802     | 39       |            |       |      |          |           |
| 4803     | 39       |            |       |      |          |           |
| 4804     | 39       |            |       |      |          |           |
| 4805     | 39       |            |       |      |          |           |
| 4806     | 39       |            |       |      |          |           |
| 4807     | 39       |            |       |      |          |           |
| 4808     | 39       |            |       |      |          |           |
| 4809     | 39       |            |       |      |          |           |
| 4810     | 39       |            |       |      |          |           |
| 4811     | 39       |            |       |      |          |           |

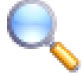



| Ereignis | Aufnahme | DAPI/CK-PE | CK-PE | DAPI | CD45-APC | HER-2/neu |
|----------|----------|------------|-------|------|----------|-----------|
| 4812     | 39       |            |       |      |          |           |
| 4813     | 39       |            |       |      |          |           |
| 4814     | 39       |            |       |      |          |           |
| 4815     | 39       |            |       |      |          |           |
| 4816     | 39       |            |       |      |          |           |
| 4817     | 39       |            |       |      |          |           |
| 4818     | 39       |            |       |      |          |           |
| 4819     | 39       |            |       |      |          |           |
| 4820     | 39       |            |       |      |          |           |
| 4821     | 39       |            |       |      |          |           |
| 4822     | 39       |            |       |      |          |           |

| Ereignis | Aufnahme | DAPI/CK-PE | CK-PE | DAPI | CD45-APC | HER-2/neu |
|----------|----------|------------|-------|------|----------|-----------|
| 4823     | 39       |            |       |      |          |           |
| 4824     | 39       |            |       |      |          |           |
| 4825     | 39       |            |       |      |          |           |
| 4826     | 39       |            |       |      |          |           |
| 4827     | 39       |            |       |      |          |           |
| 4828     | 39       |            |       |      |          |           |
| 4829     | 39       |            |       |      |          |           |
| 4830     | 39       |            |       |      |          |           |
| 4831     | 39       |            |       |      |          |           |
| 4832     | 39       |            |       |      |          |           |
| 4833     | 39       |            |       |      |          |           |
| 4834     | 39       |            |       |      |          |           |
| 4835     | 39       |            |       |      |          |           |
| 4836     | 39       |            |       |      |          |           |

| Ereignis | Aufnahme | DAPI/CK-PE                                                                          | CK-PE                                                                               | DAPI                                                                                 | CD45-APC                                                                              | HER-2/neu                                                                             |
|----------|----------|-------------------------------------------------------------------------------------|-------------------------------------------------------------------------------------|--------------------------------------------------------------------------------------|---------------------------------------------------------------------------------------|---------------------------------------------------------------------------------------|
| 4837     | 39       | 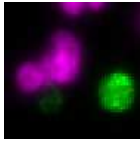   |    |    |    |    |
| 4838     | 39       |    |    |    |    |    |
| 4839     | 39       |    |    |    |    |    |
| 4840     | 39       |    |    |    |    |    |
| 4841     | 39       |    |    |    |    |    |
| 4842     | 39       |   |   |   |   |   |
| 4843     | 39       |  |  |  |  |  |
| 4844     | 39       |  |  |  |  |  |
| 4845     | 39       |  |  |  |  |  |
| 4846     | 39       |  |  |  |  |  |
| 4847     | 39       |  |  |  |  |  |



| Ereignis                                                                                    | Aufnahme | DAPI/CK-PE                                                                          | CK-PE                                                                               | DAPI                                                                                 | CD45-APC                                                                              | HER-2/neu                                                                             |
|---------------------------------------------------------------------------------------------|----------|-------------------------------------------------------------------------------------|-------------------------------------------------------------------------------------|--------------------------------------------------------------------------------------|---------------------------------------------------------------------------------------|---------------------------------------------------------------------------------------|
| 4848<br>   | 32       |    |    |    |    |    |
| 4849<br>   | 39       |    |    |    |    |    |
| 4850                                                                                        | 39       |    |    |    |    |    |
| 4851<br>   | 39       |    |    |    |    |    |
| 4852<br> | 39       |   |   |   |   |   |
| 4853                                                                                        | 39       |  |  |  |  |  |
| 4854<br> | 39       |  |  |  |  |  |
| 4855<br> | 32       |  |  |  |  |  |

| Ereignis | Aufnahme | DAPI/CK-PE | CK-PE | DAPI | CD45-APC | HER-2/neu |
|----------|----------|------------|-------|------|----------|-----------|
| 4856     | 32       |            |       |      |          |           |
| 4857     | 32       |            |       |      |          |           |
| 4858     | 39       |            |       |      |          |           |
| 4859     | 40       |            |       |      |          |           |
| 4860     | 40       |            |       |      |          |           |
| 4861     | 40       |            |       |      |          |           |
| 4862     | 40       |            |       |      |          |           |
| 4863     | 40       |            |       |      |          |           |
| 4864     | 40       |            |       |      |          |           |
| 4865     | 40       |            |       |      |          |           |
| 4866     | 40       |            |       |      |          |           |

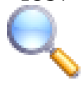

| Ereignis                                                                               | Aufnahme | DAPI/CK-PE | CK-PE | DAPI | CD45-APC | HER-2/neu |
|----------------------------------------------------------------------------------------|----------|------------|-------|------|----------|-----------|
| 4867                                                                                   | 40       |            |       |      |          |           |
| 4868                                                                                   | 40       |            |       |      |          |           |
|  4869 | 40       |            |       |      |          |           |
| 4870                                                                                   | 40       |            |       |      |          |           |
| 4871                                                                                   | 40       |            |       |      |          |           |
| 4872                                                                                   | 40       |            |       |      |          |           |
| 4873                                                                                   | 40       |            |       |      |          |           |
| 4874                                                                                   | 40       |            |       |      |          |           |
| 4875                                                                                   | 40       |            |       |      |          |           |
| 4876                                                                                   | 40       |            |       |      |          |           |
| 4877                                                                                   | 40       |            |       |      |          |           |
| 4878                                                                                   | 40       |            |       |      |          |           |



| Ereignis | Aufnahme | DAPI/CK-PE | CK-PE | DAPI | CD45-APC | HER-2/neu |
|----------|----------|------------|-------|------|----------|-----------|
| 4879     | 40       |            |       |      |          |           |
| 4880     | 40       |            |       |      |          |           |
| 4881     | 40       |            |       |      |          |           |
| 4882     | 40       |            |       |      |          |           |
| 4883     | 40       |            |       |      |          |           |
| 4884     | 40       |            |       |      |          |           |
| 4885     | 40       |            |       |      |          |           |
| 4886     | 40       |            |       |      |          |           |
| 4887     | 40       |            |       |      |          |           |
| 4888     | 40       |            |       |      |          |           |
| 4889     | 40       |            |       |      |          |           |
| 4890     | 40       |            |       |      |          |           |
| 4891     | 40       |            |       |      |          |           |
| 4892     | 40       |            |       |      |          |           |

| Ereignis | Aufnahme | DAPI/CK-PE | CK-PE | DAPI | CD45-APC | HER-2/neu |
|----------|----------|------------|-------|------|----------|-----------|
| 4893     | 40       |            |       |      |          |           |
| 4894     | 40       |            |       |      |          |           |
| 4895     | 40       |            |       |      |          |           |
| 4896     | 40       |            |       |      |          |           |
| 4897     | 40       |            |       |      |          |           |
| 4898     | 40       |            |       |      |          |           |
| 4899     | 40       |            |       |      |          |           |
| 4900     | 40       |            |       |      |          |           |
| 4901     | 40       |            |       |      |          |           |
| 4902     | 40       |            |       |      |          |           |
| 4903     | 40       |            |       |      |          |           |
| 4904     | 40       |            |       |      |          |           |
| 4905     | 40       |            |       |      |          |           |

| Ereignis | Aufnahme | DAPI/CK-PE | CK-PE | DAPI | CD45-APC | HER-2/neu |
|----------|----------|------------|-------|------|----------|-----------|
| 4906     | 40       |            |       |      |          |           |
| 4907     | 40       |            |       |      |          |           |
| 4908     | 40       |            |       |      |          |           |
| 4909     | 40       |            |       |      |          |           |
| 4910     | 40       |            |       |      |          |           |
| 4911     | 40       |            |       |      |          |           |
| 4912     | 40       |            |       |      |          |           |
| 4913     | 40       |            |       |      |          |           |
| 4914     | 40       |            |       |      |          |           |
| 4915     | 40       |            |       |      |          |           |
| 4916     | 40       |            |       |      |          |           |
| 4917     | 40       |            |       |      |          |           |
| 4918     | 40       |            |       |      |          |           |



| Ereignis                                                                                 | Aufnahme | DAPI/CK-PE | CK-PE | DAPI | CD45-APC | HER-2/neu |
|------------------------------------------------------------------------------------------|----------|------------|-------|------|----------|-----------|
| 4919                                                                                     | 40       |            |       |      |          |           |
| 4920                                                                                     | 40       |            |       |      |          |           |
|  4921   | 40       |            |       |      |          |           |
| 4922                                                                                     | 40       |            |       |      |          |           |
| 4923                                                                                     | 40       |            |       |      |          |           |
|  4924 | 40       |            |       |      |          |           |
| 4925                                                                                     | 40       |            |       |      |          |           |
| 4926                                                                                     | 40       |            |       |      |          |           |
| 4927                                                                                     | 40       |            |       |      |          |           |
|  4928 | 40       |            |       |      |          |           |
|  4929 | 40       |            |       |      |          |           |

| Ereignis                                                                                | Aufnahme | DAPI/CK-PE | CK-PE | DAPI | CD45-APC | HER-2/neu |
|-----------------------------------------------------------------------------------------|----------|------------|-------|------|----------|-----------|
| 4930                                                                                    | 40       |            |       |      |          |           |
| 4931                                                                                    | 40       |            |       |      |          |           |
| 4932                                                                                    | 40       |            |       |      |          |           |
| 4933                                                                                    | 40       |            |       |      |          |           |
| 4934                                                                                    | 40       |            |       |      |          |           |
|  4935 | 40       |            |       |      |          |           |
| 4936                                                                                    | 40       |            |       |      |          |           |
| 4937                                                                                    | 40       |            |       |      |          |           |
| 4938                                                                                    | 40       |            |       |      |          |           |
| 4939                                                                                    | 40       |            |       |      |          |           |
| 4940                                                                                    | 40       |            |       |      |          |           |
| 4941                                                                                    | 40       |            |       |      |          |           |

| Ereignis | Aufnahme | DAPI/CK-PE | CK-PE | DAPI | CD45-APC | HER-2/neu |
|----------|----------|------------|-------|------|----------|-----------|
| 4942     | 40       |            |       |      |          |           |
| 4943     | 40       |            |       |      |          |           |
| 4944     | 40       |            |       |      |          |           |
| 4945     | 40       |            |       |      |          |           |
| 4946     | 40       |            |       |      |          |           |
| 4947     | 40       |            |       |      |          |           |
| 4948     | 40       |            |       |      |          |           |
| 4949     | 40       |            |       |      |          |           |
| 4950     | 40       |            |       |      |          |           |
| 4951     | 40       |            |       |      |          |           |
| 4952     | 40       |            |       |      |          |           |
| 4953     | 40       |            |       |      |          |           |
| 4954     | 40       |            |       |      |          |           |
| 4955     | 40       |            |       |      |          |           |



| Ereignis | Aufnahme | DAPI/CK-PE                                                                          | CK-PE                                                                               | DAPI                                                                                 | CD45-APC                                                                              | HER-2/neu                                                                             |
|----------|----------|-------------------------------------------------------------------------------------|-------------------------------------------------------------------------------------|--------------------------------------------------------------------------------------|---------------------------------------------------------------------------------------|---------------------------------------------------------------------------------------|
| 4956     | 40       | 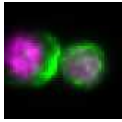   |    |    |    |    |
| 4957     | 40       |    |    |    |    |    |
| 4958     | 40       |    |    |    |    |    |
| 4959     | 40       |    |    |    |    |    |
| 4960     | 40       |    |    |    |    |    |
| 4961     | 40       |    |    |    |    |    |
| 4962     | 40       |   |   |   |   |   |
| 4963     | 40       |  |  |  |  |  |
| 4964     | 40       |  |  |  |  |  |
| 4965     | 40       |  |  |  |  |  |
| 4966     | 40       |  |  |  |  |  |
| 4967     | 40       |  |  |  |  |  |
| 4968     | 40       |  |  |  |  |  |

| Ereignis | Aufnahme | DAPI/CK-PE | CK-PE | DAPI | CD45-APC | HER-2/neu |
|----------|----------|------------|-------|------|----------|-----------|
| 4969     | 40       |            |       |      |          |           |
| 4970     | 40       |            |       |      |          |           |
| 4971     | 40       |            |       |      |          |           |
| 4972     | 40       |            |       |      |          |           |
| 4973     | 40       |            |       |      |          |           |
| 4974     | 40       |            |       |      |          |           |
| 4975     | 40       |            |       |      |          |           |
| 4976     | 40       |            |       |      |          |           |
| 4977     | 40       |            |       |      |          |           |
| 4978     | 40       |            |       |      |          |           |
| 4979     | 40       |            |       |      |          |           |

| Ereignis                                                                                 | Aufnahme | DAPI/CK-PE | CK-PE | DAPI | CD45-APC | HER-2/neu |
|------------------------------------------------------------------------------------------|----------|------------|-------|------|----------|-----------|
| 4980                                                                                     | 40       |            |       |      |          |           |
| 4981                                                                                     | 40       |            |       |      |          |           |
| 4982                                                                                     | 40       |            |       |      |          |           |
| 4983                                                                                     | 40       |            |       |      |          |           |
| 4984                                                                                     | 40       |            |       |      |          |           |
|  4985   | 40       |            |       |      |          |           |
| 4986                                                                                     | 40       |            |       |      |          |           |
| 4987                                                                                     | 40       |            |       |      |          |           |
| 4988                                                                                     | 40       |            |       |      |          |           |
| 4989                                                                                     | 40       |            |       |      |          |           |
| 4990                                                                                     | 40       |            |       |      |          |           |
|  4991 | 40       |            |       |      |          |           |



| Ereignis                                                                                 | Aufnahme | DAPI/CK-PE                                                                          | CK-PE                                                                               | DAPI                                                                                 | CD45-APC                                                                              | HER-2/neu                                                                             |
|------------------------------------------------------------------------------------------|----------|-------------------------------------------------------------------------------------|-------------------------------------------------------------------------------------|--------------------------------------------------------------------------------------|---------------------------------------------------------------------------------------|---------------------------------------------------------------------------------------|
| 4992    | 40       |    |    |    |    |    |
| 4993                                                                                     | 40       |    |    |    |    |    |
| 4994    | 40       |    |    |    |    |    |
| 4995                                                                                     | 31       |    |    |    |    |    |
| 4996  | 40       |   |   |   |   |   |
| 4997                                                                                     | 31       |  |  |  |  |  |
| 4998  | 40       |  |  |  |  |  |
| 4999                                                                                     | 40       |  |  |  |  |  |
| 5000  | 41       |  |  |  |  |  |

| Ereignis | Aufnahme | DAPI/CK-PE | CK-PE | DAPI | CD45-APC | HER-2/neu |
|----------|----------|------------|-------|------|----------|-----------|
| 5001     | 41       |            |       |      |          |           |
| 5002     | 41       |            |       |      |          |           |
| 5003     | 41       |            |       |      |          |           |
| 5004     | 41       |            |       |      |          |           |
| 5005     | 41       |            |       |      |          |           |
| 5006     | 41       |            |       |      |          |           |
| 5007     | 41       |            |       |      |          |           |
| 5008     | 41       |            |       |      |          |           |
| 5009     | 41       |            |       |      |          |           |
| 5010     | 41       |            |       |      |          |           |
| 5011     | 41       |            |       |      |          |           |
| 5012     | 41       |            |       |      |          |           |
| 5013     | 41       |            |       |      |          |           |

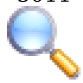

| Ereignis | Aufnahme | DAPI/CK-PE | CK-PE | DAPI | CD45-APC | HER-2/neu |
|----------|----------|------------|-------|------|----------|-----------|
| 5014     | 41       |            |       |      |          |           |
| 5015     | 41       |            |       |      |          |           |
| 5016     | 41       |            |       |      |          |           |
| 5017     | 41       |            |       |      |          |           |
| 5018     | 41       |            |       |      |          |           |
| 5019     | 41       |            |       |      |          |           |
| 5020     | 41       |            |       |      |          |           |
| 5021     | 41       |            |       |      |          |           |
| 5022     | 41       |            |       |      |          |           |
| 5023     | 41       |            |       |      |          |           |
| 5024     | 41       |            |       |      |          |           |
| 5025     | 41       |            |       |      |          |           |

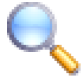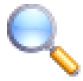



| Ereignis | Aufnahme | DAPI/CK-PE                                                                          | CK-PE                                                                               | DAPI                                                                                 | CD45-APC                                                                              | HER-2/neu                                                                             |
|----------|----------|-------------------------------------------------------------------------------------|-------------------------------------------------------------------------------------|--------------------------------------------------------------------------------------|---------------------------------------------------------------------------------------|---------------------------------------------------------------------------------------|
| 5026     | 41       | 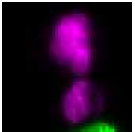   |    |    |    |    |
| 5027     | 41       |    |    |    |    |    |
| 5028     | 41       |    |    |    |    |    |
| 5029     | 41       |    |    |    |    |    |
| 5030     | 41       |    |    |    |    |    |
| 5031     | 41       |   |   |   |   |   |
| 5032     | 41       |  |  |  |  |  |
| 5033     | 41       |  |  |  |  |  |
| 5034     | 41       |  |  |  |  |  |
| 5035     | 41       |  |  |  |  |  |
| 5036     | 41       |  |  |  |  |  |
| 5037     | 41       |  |  |  |  |  |

| Ereignis                                                                                 | Aufnahme | DAPI/CK-PE                                                                          | CK-PE                                                                               | DAPI                                                                                 | CD45-APC                                                                              | HER-2/neu                                                                             |
|------------------------------------------------------------------------------------------|----------|-------------------------------------------------------------------------------------|-------------------------------------------------------------------------------------|--------------------------------------------------------------------------------------|---------------------------------------------------------------------------------------|---------------------------------------------------------------------------------------|
| 5038    | 41       |    |    |    |    |    |
| 5039    | 41       |    |    |    |    |    |
| 5040                                                                                     | 41       |    |    |    |    |    |
| 5041                                                                                     | 41       |    |    |    |    |    |
| 5042                                                                                     | 41       |   |   |   |   |   |
| 5043                                                                                     | 41       |  |  |  |  |  |
| 5044                                                                                     | 41       |  |  |  |  |  |
| 5045  | 41       |  |  |  |  |  |
| 5046                                                                                     | 41       |  |  |  |  |  |
| 5047                                                                                     | 41       |  |  |  |  |  |
| 5048                                                                                     | 41       |  |  |  |  |  |

| Ereignis | Aufnahme | DAPI/CK-PE | CK-PE | DAPI | CD45-APC | HER-2/neu |
|----------|----------|------------|-------|------|----------|-----------|
| 5049     | 41       |            |       |      |          |           |
| 5050     | 41       |            |       |      |          |           |
| 5051     | 41       |            |       |      |          |           |
| 5052     | 41       |            |       |      |          |           |
| 5053     | 41       |            |       |      |          |           |
| 5054     | 41       |            |       |      |          |           |
| 5055     | 41       |            |       |      |          |           |
| 5056     | 41       |            |       |      |          |           |
| 5057     | 41       |            |       |      |          |           |
| 5058     | 41       |            |       |      |          |           |
| 5059     | 41       |            |       |      |          |           |



| Ereignis | Aufnahme | DAPI/CK-PE | CK-PE | DAPI | CD45-APC | HER-2/neu |
|----------|----------|------------|-------|------|----------|-----------|
| 5060     | 41       |            |       |      |          |           |
| 5061     | 41       |            |       |      |          |           |
| 5062     | 41       |            |       |      |          |           |
| 5063     | 41       |            |       |      |          |           |
| 5064     | 41       |            |       |      |          |           |
| 5065     | 41       |            |       |      |          |           |
| 5066     | 41       |            |       |      |          |           |
| 5067     | 41       |            |       |      |          |           |
| 5068     | 41       |            |       |      |          |           |
| 5069     | 41       |            |       |      |          |           |
| 5070     | 41       |            |       |      |          |           |
| 5071     | 41       |            |       |      |          |           |

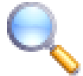

| Ereignis | Aufnahme | DAPI/CK-PE | CK-PE | DAPI | CD45-APC | HER-2/neu |
|----------|----------|------------|-------|------|----------|-----------|
| 5072     | 41       |            |       |      |          |           |
| 5073     | 41       |            |       |      |          |           |
| 5074     | 41       |            |       |      |          |           |
| 5075     | 41       |            |       |      |          |           |
| 5076     | 41       |            |       |      |          |           |
| 5077     | 41       |            |       |      |          |           |
| 5078     | 41       |            |       |      |          |           |
| 5079     | 41       |            |       |      |          |           |
| 5080     | 41       |            |       |      |          |           |
| 5081     | 41       |            |       |      |          |           |
| 5082     | 41       |            |       |      |          |           |
| 5083     | 41       |            |       |      |          |           |

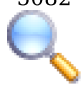

| Ereignis | Aufnahme | DAPI/CK-PE | CK-PE | DAPI | CD45-APC | HER-2/neu |
|----------|----------|------------|-------|------|----------|-----------|
| 5084     | 41       |            |       |      |          |           |
| 5085     | 41       |            |       |      |          |           |
| 5086     | 41       |            |       |      |          |           |
| 5087     | 41       |            |       |      |          |           |
| 5088     | 41       |            |       |      |          |           |
| 5089     | 41       |            |       |      |          |           |
| 5090     | 41       |            |       |      |          |           |
| 5091     | 41       |            |       |      |          |           |
| 5092     | 41       |            |       |      |          |           |
| 5093     | 41       |            |       |      |          |           |
| 5094     | 41       |            |       |      |          |           |



| Ereignis | Aufnahme | DAPI/CK-PE | CK-PE | DAPI | CD45-APC | HER-2/neu |
|----------|----------|------------|-------|------|----------|-----------|
| 5095     | 41       |            |       |      |          |           |
| 5096     | 41       |            |       |      |          |           |
| 5097     | 41       |            |       |      |          |           |
| 5098     | 41       |            |       |      |          |           |
| 5099     | 41       |            |       |      |          |           |
| 5100     | 41       |            |       |      |          |           |
| 5101     | 41       |            |       |      |          |           |
| 5102     | 41       |            |       |      |          |           |
| 5103     | 41       |            |       |      |          |           |
| 5104     | 41       |            |       |      |          |           |
| 5105     | 41       |            |       |      |          |           |

| Ereignis | Aufnahme | DAPI/CK-PE | CK-PE | DAPI | CD45-APC | HER-2/neu |
|----------|----------|------------|-------|------|----------|-----------|
| 5106     | 41       |            |       |      |          |           |
| 5107     | 41       |            |       |      |          |           |
| 5108     | 41       |            |       |      |          |           |
| 5109     | 41       |            |       |      |          |           |
| 5110     | 41       |            |       |      |          |           |
| 5111     | 41       |            |       |      |          |           |
| 5112     | 41       |            |       |      |          |           |
| 5113     | 41       |            |       |      |          |           |
| 5114     | 41       |            |       |      |          |           |
| 5115     | 41       |            |       |      |          |           |
| 5116     | 41       |            |       |      |          |           |
| 5117     | 41       |            |       |      |          |           |
| 5118     | 41       |            |       |      |          |           |

| Ereignis | Aufnahme | DAPI/CK-PE | CK-PE | DAPI | CD45-APC | HER-2/neu |
|----------|----------|------------|-------|------|----------|-----------|
| 5119     | 41       |            |       |      |          |           |
| 5120     | 41       |            |       |      |          |           |
| 5121     | 41       |            |       |      |          |           |
| 5122     | 41       |            |       |      |          |           |
| 5123     | 41       |            |       |      |          |           |
| 5124     | 41       |            |       |      |          |           |
| 5125     | 41       |            |       |      |          |           |
| 5126     | 41       |            |       |      |          |           |
| 5127     | 41       |            |       |      |          |           |
| 5128     | 41       |            |       |      |          |           |
| 5129     | 41       |            |       |      |          |           |
| 5130     | 41       |            |       |      |          |           |
| 5131     | 41       |            |       |      |          |           |

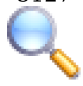



| Ereignis | Aufnahme | DAPI/CK-PE | CK-PE | DAPI | CD45-APC | HER-2/neu |
|----------|----------|------------|-------|------|----------|-----------|
| 5132     | 41       |            |       |      |          |           |
| 5133     | 41       |            |       |      |          |           |
| 5134     | 41       |            |       |      |          |           |
| 5135     | 41       |            |       |      |          |           |
| 5136     | 41       |            |       |      |          |           |
| 5137     | 41       |            |       |      |          |           |
| 5138     | 41       |            |       |      |          |           |
| 5139     | 41       |            |       |      |          |           |
| 5140     | 41       |            |       |      |          |           |
| 5141     | 41       |            |       |      |          |           |
| 5142     | 41       |            |       |      |          |           |
| 5143     | 41       |            |       |      |          |           |

| Ereignis | Aufnahme | DAPI/CK-PE | CK-PE | DAPI | CD45-APC | HER-2/neu |
|----------|----------|------------|-------|------|----------|-----------|
| 5144     | 41       |            |       |      |          |           |
| 5145     | 41       |            |       |      |          |           |
| 5146     | 41       |            |       |      |          |           |
| 5147     | 41       |            |       |      |          |           |
| 5148     | 41       |            |       |      |          |           |
| 5149     | 41       |            |       |      |          |           |
| 5150     | 41       |            |       |      |          |           |
| 5151     | 41       |            |       |      |          |           |
| 5152     | 41       |            |       |      |          |           |
| 5153     | 41       |            |       |      |          |           |
| 5154     | 41       |            |       |      |          |           |
| 5155     | 41       |            |       |      |          |           |

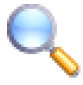

| Ereignis                                                                                 | Aufnahme | DAPI/CK-PE | CK-PE | DAPI | CD45-APC | HER-2/neu |
|------------------------------------------------------------------------------------------|----------|------------|-------|------|----------|-----------|
| 5156                                                                                     | 41       |            |       |      |          |           |
| 5157                                                                                     | 41       |            |       |      |          |           |
| 5158                                                                                     | 41       |            |       |      |          |           |
| 5159                                                                                     | 41       |            |       |      |          |           |
| 5160                                                                                     | 41       |            |       |      |          |           |
| 5161                                                                                     | 41       |            |       |      |          |           |
|  5162 | 41       |            |       |      |          |           |
| 5163                                                                                     | 41       |            |       |      |          |           |
| 5164                                                                                     | 41       |            |       |      |          |           |
| 5165                                                                                     | 41       |            |       |      |          |           |
| 5166                                                                                     | 41       |            |       |      |          |           |
| 5167                                                                                     | 41       |            |       |      |          |           |
| 5168                                                                                     | 41       |            |       |      |          |           |



| Ereignis | Aufnahme | DAPI/CK-PE | CK-PE | DAPI | CD45-APC | HER-2/neu |
|----------|----------|------------|-------|------|----------|-----------|
| 5169     | 41       |            |       |      |          |           |
| 5170     | 41       |            |       |      |          |           |
| 5171     | 41       |            |       |      |          |           |
| 5172     | 41       |            |       |      |          |           |
| 5173     | 41       |            |       |      |          |           |
| 5174     | 41       |            |       |      |          |           |
| 5175     | 40       |            |       |      |          |           |
| 5176     | 30       |            |       |      |          |           |
| 5177     | 30       |            |       |      |          |           |
| 5178     | 30       |            |       |      |          |           |
| 5179     | 30       |            |       |      |          |           |

| Ereignis                                                                                 | Aufnahme | DAPI/CK-PE                                                                          | CK-PE                                                                               | DAPI                                                                                 | CD45-APC                                                                              | HER-2/neu                                                                             |
|------------------------------------------------------------------------------------------|----------|-------------------------------------------------------------------------------------|-------------------------------------------------------------------------------------|--------------------------------------------------------------------------------------|---------------------------------------------------------------------------------------|---------------------------------------------------------------------------------------|
| 5180    | 41       |    |    |    |    |    |
| 5181                                                                                     | 41       |    |    |    |    |    |
| 5182                                                                                     | 41       |    |    |    |    |    |
| 5183                                                                                     | 40       |    |    |    |    |    |
| 5184   | 41       |   |   |   |   |   |
| 5185                                                                                     | 41       |  |  |  |  |  |
| 5186                                                                                     | 42       |  |  |  |  |  |
| 5187  | 42       |  |  |  |  |  |
| 5188                                                                                     | 42       |  |  |  |  |  |
| 5189                                                                                     | 42       |  |  |  |  |  |

| Ereignis | Aufnahme | DAPI/CK-PE | CK-PE | DAPI | CD45-APC | HER-2/neu |
|----------|----------|------------|-------|------|----------|-----------|
| 5190     | 42       |            |       |      |          |           |
| 5191     | 42       |            |       |      |          |           |
| 5192     | 42       |            |       |      |          |           |
| 5193     | 42       |            |       |      |          |           |
| 5194     | 42       |            |       |      |          |           |
| 5195     | 42       |            |       |      |          |           |
| 5196     | 42       |            |       |      |          |           |
| 5197     | 42       |            |       |      |          |           |
| 5198     | 42       |            |       |      |          |           |
| 5199     | 42       |            |       |      |          |           |
| 5200     | 42       |            |       |      |          |           |
| 5201     | 42       |            |       |      |          |           |
| 5202     | 42       |            |       |      |          |           |

| Ereignis | Aufnahme | DAPI/CK-PE | CK-PE | DAPI | CD45-APC | HER-2/neu |
|----------|----------|------------|-------|------|----------|-----------|
| 5203     | 42       |            |       |      |          |           |
| 5204     | 42       |            |       |      |          |           |
| 5205     | 42       |            |       |      |          |           |
| 5206     | 42       |            |       |      |          |           |
| 5207     | 42       |            |       |      |          |           |
| 5208     | 42       |            |       |      |          |           |
| 5209     | 42       |            |       |      |          |           |
| 5210     | 42       |            |       |      |          |           |
| 5211     | 42       |            |       |      |          |           |
| 5212     | 42       |            |       |      |          |           |
| 5213     | 42       |            |       |      |          |           |



| Ereignis | Aufnahme | DAPI/CK-PE | CK-PE | DAPI | CD45-APC | HER-2/neu |
|----------|----------|------------|-------|------|----------|-----------|
| 5214     | 42       |            |       |      |          |           |
| 5215     | 42       |            |       |      |          |           |
| 5216     | 42       |            |       |      |          |           |
| 5217     | 42       |            |       |      |          |           |
| 5218     | 42       |            |       |      |          |           |
| 5219     | 42       |            |       |      |          |           |
| 5220     | 42       |            |       |      |          |           |
| 5221     | 42       |            |       |      |          |           |
| 5222     | 42       |            |       |      |          |           |
| 5223     | 42       |            |       |      |          |           |
| 5224     | 42       |            |       |      |          |           |
| 5225     | 42       |            |       |      |          |           |

| Ereignis | Aufnahme | DAPI/CK-PE | CK-PE | DAPI | CD45-APC | HER-2/neu |
|----------|----------|------------|-------|------|----------|-----------|
| 5226     | 42       |            |       |      |          |           |
| 5227     | 42       |            |       |      |          |           |
| 5228     | 42       |            |       |      |          |           |
| 5229     | 42       |            |       |      |          |           |
| 5230     | 42       |            |       |      |          |           |
| 5231     | 42       |            |       |      |          |           |
| 5232     | 42       |            |       |      |          |           |
| 5233     | 42       |            |       |      |          |           |
| 5234     | 42       |            |       |      |          |           |
| 5235     | 42       |            |       |      |          |           |
| 5236     | 42       |            |       |      |          |           |

| Ereignis | Aufnahme | DAPI/CK-PE | CK-PE | DAPI | CD45-APC | HER-2/neu |
|----------|----------|------------|-------|------|----------|-----------|
| 5237     | 42       |            |       |      |          |           |
| 5238     | 42       |            |       |      |          |           |
| 5239     | 42       |            |       |      |          |           |
| 5240     | 42       |            |       |      |          |           |
| 5241     | 42       |            |       |      |          |           |
| 5242     | 42       |            |       |      |          |           |
| 5243     | 42       |            |       |      |          |           |
| 5244     | 42       |            |       |      |          |           |
| 5245     | 42       |            |       |      |          |           |
| 5246     | 42       |            |       |      |          |           |
| 5247     | 42       |            |       |      |          |           |

| Ereignis | Aufnahme | DAPI/CK-PE | CK-PE | DAPI | CD45-APC | HER-2/neu |
|----------|----------|------------|-------|------|----------|-----------|
| 5248     | 42       |            |       |      |          |           |
| 5249     | 42       |            |       |      |          |           |
| 5250     | 42       |            |       |      |          |           |
| 5251     | 42       |            |       |      |          |           |
| 5252     | 42       |            |       |      |          |           |
| 5253     | 42       |            |       |      |          |           |
| 5254     | 42       |            |       |      |          |           |
| 5255     | 42       |            |       |      |          |           |
| 5256     | 42       |            |       |      |          |           |
| 5257     | 42       |            |       |      |          |           |
| 5258     | 42       |            |       |      |          |           |
| 5259     | 42       |            |       |      |          |           |
| 5260     | 42       |            |       |      |          |           |



| Ereignis | Aufnahme | DAPI/CK-PE | CK-PE | DAPI | CD45-APC | HER-2/neu |
|----------|----------|------------|-------|------|----------|-----------|
| 5261     | 42       |            |       |      |          |           |
| 5262     | 42       |            |       |      |          |           |
| 5263     | 42       |            |       |      |          |           |
| 5264     | 42       |            |       |      |          |           |
| 5265     | 42       |            |       |      |          |           |
| 5266     | 42       |            |       |      |          |           |
| 5267     | 42       |            |       |      |          |           |
| 5268     | 42       |            |       |      |          |           |
| 5269     | 42       |            |       |      |          |           |
| 5270     | 42       |            |       |      |          |           |
| 5271     | 42       |            |       |      |          |           |

| Ereignis | Aufnahme | DAPI/CK-PE | CK-PE | DAPI | CD45-APC | HER-2/neu |
|----------|----------|------------|-------|------|----------|-----------|
| 5272     | 42       |            |       |      |          |           |
| 5273     | 42       |            |       |      |          |           |
| 5274     | 42       |            |       |      |          |           |
| 5275     | 42       |            |       |      |          |           |
| 5276     | 42       |            |       |      |          |           |
| 5277     | 42       |            |       |      |          |           |
| 5278     | 42       |            |       |      |          |           |
| 5279     | 42       |            |       |      |          |           |
| 5280     | 42       |            |       |      |          |           |
| 5281     | 42       |            |       |      |          |           |
| 5282     | 42       |            |       |      |          |           |
| 5283     | 42       |            |       |      |          |           |

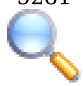

| Ereignis | Aufnahme | DAPI/CK-PE | CK-PE | DAPI | CD45-APC | HER-2/neu |
|----------|----------|------------|-------|------|----------|-----------|
| 5284     | 42       |            |       |      |          |           |
| 5285     | 42       |            |       |      |          |           |
| 5286     | 42       |            |       |      |          |           |
| 5287     | 42       |            |       |      |          |           |
| 5288     | 42       |            |       |      |          |           |
| 5289     | 42       |            |       |      |          |           |
| 5290     | 42       |            |       |      |          |           |
| 5291     | 42       |            |       |      |          |           |
| 5292     | 42       |            |       |      |          |           |
| 5293     | 42       |            |       |      |          |           |
| 5294     | 42       |            |       |      |          |           |
| 5295     | 42       |            |       |      |          |           |
| 5296     | 42       |            |       |      |          |           |

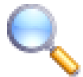

| Ereignis | Aufnahme | DAPI/CK-PE | CK-PE | DAPI | CD45-APC | HER-2/neu |
|----------|----------|------------|-------|------|----------|-----------|
| 5297     | 42       |            |       |      |          |           |
| 5298     | 42       |            |       |      |          |           |
| 5299     | 42       |            |       |      |          |           |
| 5300     | 42       |            |       |      |          |           |
| 5301     | 42       |            |       |      |          |           |
| 5302     | 42       |            |       |      |          |           |
| 5303     | 42       |            |       |      |          |           |
| 5304     | 42       |            |       |      |          |           |
| 5305     | 42       |            |       |      |          |           |
| 5306     | 42       |            |       |      |          |           |
| 5307     | 42       |            |       |      |          |           |
| 5308     | 42       |            |       |      |          |           |

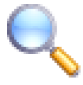



| Ereignis | Aufnahme | DAPI/CK-PE | CK-PE | DAPI | CD45-APC | HER-2/neu |
|----------|----------|------------|-------|------|----------|-----------|
| 5309     | 42       |            |       |      |          |           |
| 5310     | 42       |            |       |      |          |           |
| 5311     | 42       |            |       |      |          |           |
| 5312     | 42       |            |       |      |          |           |
| 5313     | 42       |            |       |      |          |           |
| 5314     | 42       |            |       |      |          |           |
| 5315     | 42       |            |       |      |          |           |
| 5316     | 42       |            |       |      |          |           |
| 5317     | 42       |            |       |      |          |           |
| 5318     | 42       |            |       |      |          |           |
| 5319     | 42       |            |       |      |          |           |
| 5320     | 42       |            |       |      |          |           |

| Ereignis | Aufnahme | DAPI/CK-PE | CK-PE | DAPI | CD45-APC | HER-2/neu |
|----------|----------|------------|-------|------|----------|-----------|
| 5321     | 42       |            |       |      |          |           |
| 5322     | 42       |            |       |      |          |           |
| 5323     | 42       |            |       |      |          |           |
| 5324     | 42       |            |       |      |          |           |
| 5325     | 42       |            |       |      |          |           |
| 5326     | 42       |            |       |      |          |           |
| 5327     | 42       |            |       |      |          |           |
| 5328     | 42       |            |       |      |          |           |
| 5329     | 42       |            |       |      |          |           |
| 5330     | 42       |            |       |      |          |           |
| 5331     | 42       |            |       |      |          |           |
| 5332     | 42       |            |       |      |          |           |
| 5333     | 42       |            |       |      |          |           |

| Ereignis | Aufnahme | DAPI/CK-PE | CK-PE | DAPI | CD45-APC | HER-2/neu |
|----------|----------|------------|-------|------|----------|-----------|
| 5334     | 42       |            |       |      |          |           |
| 5335     | 42       |            |       |      |          |           |
| 5336     | 42       |            |       |      |          |           |
| 5337     | 42       |            |       |      |          |           |
| 5338     | 42       |            |       |      |          |           |
| 5339     | 42       |            |       |      |          |           |
| 5340     | 42       |            |       |      |          |           |
| 5341     | 42       |            |       |      |          |           |
| 5342     | 42       |            |       |      |          |           |
| 5343     | 42       |            |       |      |          |           |
| 5344     | 42       |            |       |      |          |           |
| 5345     | 42       |            |       |      |          |           |
| 5346     | 42       |            |       |      |          |           |

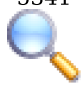

| Ereignis                                                                                 | Aufnahme | DAPI/CK-PE | CK-PE | DAPI | CD45-APC | HER-2/neu |
|------------------------------------------------------------------------------------------|----------|------------|-------|------|----------|-----------|
| 5347                                                                                     | 42       |            |       |      |          |           |
| 5348                                                                                     | 42       |            |       |      |          |           |
|  5349   | 42       |            |       |      |          |           |
| 5350                                                                                     | 42       |            |       |      |          |           |
| 5351                                                                                     | 42       |            |       |      |          |           |
| 5352                                                                                     | 42       |            |       |      |          |           |
| 5353                                                                                     | 42       |            |       |      |          |           |
|  5354 | 42       |            |       |      |          |           |
| 5355                                                                                     | 42       |            |       |      |          |           |
|  5356 | 42       |            |       |      |          |           |
| 5357                                                                                     | 42       |            |       |      |          |           |



| Ereignis | Aufnahme | DAPI/CK-PE | CK-PE | DAPI | CD45-APC | HER-2/neu |
|----------|----------|------------|-------|------|----------|-----------|
| 5358     | 42       |            |       |      |          |           |
| 5359     | 42       |            |       |      |          |           |
| 5360     | 42       |            |       |      |          |           |
| 5361     | 42       |            |       |      |          |           |
| 5362     | 42       |            |       |      |          |           |
| 5363     | 42       |            |       |      |          |           |
| 5364     | 42       |            |       |      |          |           |
| 5365     | 42       |            |       |      |          |           |
| 5366     | 42       |            |       |      |          |           |
| 5367     | 42       |            |       |      |          |           |
| 5368     | 42       |            |       |      |          |           |
| 5369     | 42       |            |       |      |          |           |

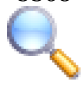

| Ereignis | Aufnahme | DAPI/CK-PE | CK-PE | DAPI | CD45-APC | HER-2/neu |
|----------|----------|------------|-------|------|----------|-----------|
| 5370     | 42       |            |       |      |          |           |
| 5371     | 42       |            |       |      |          |           |
| 5372     | 42       |            |       |      |          |           |
| 5373     | 42       |            |       |      |          |           |
| 5374     | 42       |            |       |      |          |           |
| 5375     | 42       |            |       |      |          |           |
| 5376     | 42       |            |       |      |          |           |
| 5377     | 42       |            |       |      |          |           |
| 5378     | 42       |            |       |      |          |           |
| 5379     | 42       |            |       |      |          |           |
| 5380     | 42       |            |       |      |          |           |
| 5381     | 42       |            |       |      |          |           |
| 5382     | 42       |            |       |      |          |           |

| Ereignis | Aufnahme | DAPI/CK-PE | CK-PE | DAPI | CD45-APC | HER-2/neu |
|----------|----------|------------|-------|------|----------|-----------|
| 5383     | 42       |            |       |      |          |           |
| 5384     | 42       |            |       |      |          |           |
| 5385     | 41       |            |       |      |          |           |
| 5386     | 42       |            |       |      |          |           |
| 5387     | 42       |            |       |      |          |           |
| 5388     | 41       |            |       |      |          |           |
| 5389     | 29       |            |       |      |          |           |
| 5390     | 29       |            |       |      |          |           |
| 5391     | 41       |            |       |      |          |           |

| Ereignis | Aufnahme | DAPI/CK-PE                                                                          | CK-PE                                                                               | DAPI                                                                                 | CD45-APC                                                                              | HER-2/neu                                                                             |
|----------|----------|-------------------------------------------------------------------------------------|-------------------------------------------------------------------------------------|--------------------------------------------------------------------------------------|---------------------------------------------------------------------------------------|---------------------------------------------------------------------------------------|
| 5392     | 41       | 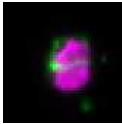   |    |    |    |    |
| 5393     | 42       |    |    |    |    |    |
| 5394     | 42       |    |    |    |    |    |
| 5395     | 43       |    |    |    |    |    |
| 5396     | 43       |   |   |   |   |   |
| 5397     | 43       |  |  |  |  |  |
| 5398     | 43       |  |  |  |  |  |
| 5399     | 43       |  |  |  |  |  |
| 5400     | 43       |  |  |  |  |  |
| 5401     | 43       |  |  |  |  |  |
| 5402     | 43       |  |  |  |  |  |



| Ereignis | Aufnahme | DAPI/CK-PE | CK-PE | DAPI | CD45-APC | HER-2/neu |
|----------|----------|------------|-------|------|----------|-----------|
| 5403     | 43       |            |       |      |          |           |
| 5404     | 43       |            |       |      |          |           |
| 5405     | 43       |            |       |      |          |           |
| 5406     | 43       |            |       |      |          |           |
| 5407     | 43       |            |       |      |          |           |
| 5408     | 43       |            |       |      |          |           |
| 5409     | 43       |            |       |      |          |           |
| 5410     | 43       |            |       |      |          |           |
| 5411     | 43       |            |       |      |          |           |
| 5412     | 43       |            |       |      |          |           |
| 5413     | 43       |            |       |      |          |           |
| 5414     | 43       |            |       |      |          |           |

| Ereignis | Aufnahme | DAPI/CK-PE | CK-PE | DAPI | CD45-APC | HER-2/neu |
|----------|----------|------------|-------|------|----------|-----------|
| 5415     | 43       |            |       |      |          |           |
| 5416     | 43       |            |       |      |          |           |
| 5417     | 43       |            |       |      |          |           |
| 5418     | 43       |            |       |      |          |           |
| 5419     | 43       |            |       |      |          |           |
| 5420     | 43       |            |       |      |          |           |
| 5421     | 43       |            |       |      |          |           |
| 5422     | 43       |            |       |      |          |           |
| 5423     | 43       |            |       |      |          |           |
| 5424     | 43       |            |       |      |          |           |
| 5425     | 43       |            |       |      |          |           |
| 5426     | 43       |            |       |      |          |           |

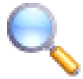

| Ereignis | Aufnahme | DAPI/CK-PE | CK-PE | DAPI | CD45-APC | HER-2/neu |
|----------|----------|------------|-------|------|----------|-----------|
| 5427     | 43       |            |       |      |          |           |
| 5428     | 43       |            |       |      |          |           |
| 5429     | 43       |            |       |      |          |           |
| 5430     | 43       |            |       |      |          |           |
| 5431     | 43       |            |       |      |          |           |
| 5432     | 43       |            |       |      |          |           |
| 5433     | 43       |            |       |      |          |           |
| 5434     | 43       |            |       |      |          |           |
| 5435     | 43       |            |       |      |          |           |
| 5436     | 43       |            |       |      |          |           |
| 5437     | 43       |            |       |      |          |           |

| Ereignis | Aufnahme | DAPI/CK-PE | CK-PE | DAPI | CD45-APC | HER-2/neu |
|----------|----------|------------|-------|------|----------|-----------|
| 5438     | 43       |            |       |      |          |           |
| 5439     | 43       |            |       |      |          |           |
| 5440     | 43       |            |       |      |          |           |
| 5441     | 43       |            |       |      |          |           |
| 5442     | 43       |            |       |      |          |           |
| 5443     | 43       |            |       |      |          |           |
| 5444     | 43       |            |       |      |          |           |
| 5445     | 43       |            |       |      |          |           |
| 5446     | 43       |            |       |      |          |           |
| 5447     | 43       |            |       |      |          |           |



| Ereignis | Aufnahme | DAPI/CK-PE | CK-PE | DAPI | CD45-APC | HER-2/neu |
|----------|----------|------------|-------|------|----------|-----------|
| 5448     | 43       |            |       |      |          |           |
| 5449     | 43       |            |       |      |          |           |
| 5450     | 43       |            |       |      |          |           |
| 5451     | 43       |            |       |      |          |           |
| 5452     | 43       |            |       |      |          |           |
| 5453     | 43       |            |       |      |          |           |
| 5454     | 43       |            |       |      |          |           |
| 5455     | 43       |            |       |      |          |           |
| 5456     | 43       |            |       |      |          |           |
| 5457     | 43       |            |       |      |          |           |
| 5458     | 43       |            |       |      |          |           |

| Ereignis | Aufnahme | DAPI/CK-PE | CK-PE | DAPI | CD45-APC | HER-2/neu |
|----------|----------|------------|-------|------|----------|-----------|
| 5459     | 43       |            |       |      |          |           |
| 5460     | 43       |            |       |      |          |           |
| 5461     | 43       |            |       |      |          |           |
| 5462     | 43       |            |       |      |          |           |
| 5463     | 43       |            |       |      |          |           |
| 5464     | 43       |            |       |      |          |           |
| 5465     | 43       |            |       |      |          |           |
| 5466     | 43       |            |       |      |          |           |
| 5467     | 43       |            |       |      |          |           |
| 5468     | 43       |            |       |      |          |           |
| 5469     | 43       |            |       |      |          |           |



| Ereignis                                                                               | Aufnahme | DAPI/CK-PE | CK-PE | DAPI | CD45-APC | HER-2/neu |
|----------------------------------------------------------------------------------------|----------|------------|-------|------|----------|-----------|
| 5470                                                                                   | 43       |            |       |      |          |           |
| 5471                                                                                   | 43       |            |       |      |          |           |
| 5472                                                                                   | 43       |            |       |      |          |           |
|  5473 | 43       |            |       |      |          |           |
| 5474                                                                                   | 43       |            |       |      |          |           |
| 5475                                                                                   | 43       |            |       |      |          |           |
| 5476                                                                                   | 43       |            |       |      |          |           |
| 5477                                                                                   | 43       |            |       |      |          |           |
| 5478                                                                                   | 43       |            |       |      |          |           |
| 5479                                                                                   | 43       |            |       |      |          |           |
| 5480                                                                                   | 43       |            |       |      |          |           |
| 5481                                                                                   | 43       |            |       |      |          |           |

| Ereignis | Aufnahme | DAPI/CK-PE | CK-PE | DAPI | CD45-APC | HER-2/neu |
|----------|----------|------------|-------|------|----------|-----------|
| 5482     | 43       |            |       |      |          |           |
| 5483     | 43       |            |       |      |          |           |
| 5484     | 43       |            |       |      |          |           |
| 5485     | 43       |            |       |      |          |           |
| 5486     | 43       |            |       |      |          |           |
| 5487     | 43       |            |       |      |          |           |
| 5488     | 43       |            |       |      |          |           |
| 5489     | 43       |            |       |      |          |           |
| 5490     | 43       |            |       |      |          |           |
| 5491     | 43       |            |       |      |          |           |
| 5492     | 43       |            |       |      |          |           |



| Ereignis | Aufnahme | DAPI/CK-PE | CK-PE | DAPI | CD45-APC | HER-2/neu |
|----------|----------|------------|-------|------|----------|-----------|
| 5493     | 43       |            |       |      |          |           |
| 5494     | 43       |            |       |      |          |           |
| 5495     | 43       |            |       |      |          |           |
| 5496     | 43       |            |       |      |          |           |
| 5497     | 43       |            |       |      |          |           |
| 5498     | 43       |            |       |      |          |           |
| 5499     | 43       |            |       |      |          |           |
| 5500     | 43       |            |       |      |          |           |
| 5501     | 43       |            |       |      |          |           |
| 5502     | 43       |            |       |      |          |           |
| 5503     | 43       |            |       |      |          |           |

| Ereignis | Aufnahme | DAPI/CK-PE | CK-PE | DAPI | CD45-APC | HER-2/neu |
|----------|----------|------------|-------|------|----------|-----------|
| 5504     | 43       |            |       |      |          |           |
| 5505     | 43       |            |       |      |          |           |
| 5506     | 43       |            |       |      |          |           |
| 5507     | 43       |            |       |      |          |           |
| 5508     | 43       |            |       |      |          |           |
| 5509     | 43       |            |       |      |          |           |
| 5510     | 43       |            |       |      |          |           |
| 5511     | 43       |            |       |      |          |           |
| 5512     | 43       |            |       |      |          |           |
| 5513     | 43       |            |       |      |          |           |
| 5514     | 43       |            |       |      |          |           |

| Ereignis | Aufnahme | DAPI/CK-PE                                                                          | CK-PE                                                                               | DAPI                                                                                 | CD45-APC                                                                              | HER-2/neu                                                                             |
|----------|----------|-------------------------------------------------------------------------------------|-------------------------------------------------------------------------------------|--------------------------------------------------------------------------------------|---------------------------------------------------------------------------------------|---------------------------------------------------------------------------------------|
| 5515     | 43       | 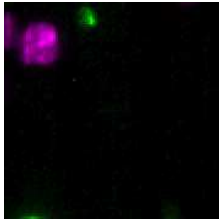   |    |    |    |    |
| 5516     | 43       |    |    |    |    |    |
| 5517     | 43       |    |    |    |    |    |
| 5518     | 43       |    |    |    |    |    |
| 5519     | 43       |    |    |    |    |    |
| 5520     | 43       |   |   |   |   |   |
| 5521     | 43       |  |  |  |  |  |
| 5522     | 43       |  |  |  |  |  |
| 5523     | 43       |  |  |  |  |  |
| 5524     | 43       |  |  |  |  |  |
| 5525     | 43       |  |  |  |  |  |

| Ereignis | Aufnahme | DAPI/CK-PE | CK-PE | DAPI | CD45-APC | HER-2/neu |
|----------|----------|------------|-------|------|----------|-----------|
| 5526     | 43       |            |       |      |          |           |
| 5527     | 43       |            |       |      |          |           |
| 5528     | 43       |            |       |      |          |           |
| 5529     | 43       |            |       |      |          |           |
| 5530     | 43       |            |       |      |          |           |
| 5531     | 43       |            |       |      |          |           |
| 5532     | 43       |            |       |      |          |           |
| 5533     | 43       |            |       |      |          |           |
| 5534     | 43       |            |       |      |          |           |
| 5535     | 43       |            |       |      |          |           |
| 5536     | 43       |            |       |      |          |           |
| 5537     | 43       |            |       |      |          |           |
| 5538     | 43       |            |       |      |          |           |
| 5539     | 43       |            |       |      |          |           |



| Ereignis | Aufnahme | DAPI/CK-PE | CK-PE | DAPI | CD45-APC | HER-2/neu |
|----------|----------|------------|-------|------|----------|-----------|
| 5540     | 43       |            |       |      |          |           |
| 5541     | 43       |            |       |      |          |           |
| 5542     | 43       |            |       |      |          |           |
| 5543     | 43       |            |       |      |          |           |
| 5544     | 43       |            |       |      |          |           |
| 5545     | 43       |            |       |      |          |           |
| 5546     | 43       |            |       |      |          |           |
| 5547     | 43       |            |       |      |          |           |
| 5548     | 43       |            |       |      |          |           |
| 5549     | 43       |            |       |      |          |           |
| 5550     | 43       |            |       |      |          |           |
| 5551     | 43       |            |       |      |          |           |

| Ereignis                                                                                 | Aufnahme | DAPI/CK-PE                                                                          | CK-PE                                                                               | DAPI                                                                                 | CD45-APC                                                                              | HER-2/neu                                                                             |
|------------------------------------------------------------------------------------------|----------|-------------------------------------------------------------------------------------|-------------------------------------------------------------------------------------|--------------------------------------------------------------------------------------|---------------------------------------------------------------------------------------|---------------------------------------------------------------------------------------|
| 5552    | 43       |    |    |    |    |    |
| 5553                                                                                     | 43       |    |    |    |    |    |
| 5554                                                                                     | 43       |    |    |    |    |    |
| 5555                                                                                     | 43       |    |    |    |    |    |
| 5556                                                                                     | 43       |    |    |    |    |    |
| 5557                                                                                     | 43       |   |   |   |   |   |
| 5558                                                                                     | 43       |  |  |  |  |  |
| 5559  | 43       |  |  |  |  |  |
| 5560                                                                                     | 43       |  |  |  |  |  |
| 5561                                                                                     | 43       |  |  |  |  |  |
| 5562                                                                                     | 43       |  |  |  |  |  |

| Ereignis | Aufnahme | DAPI/CK-PE | CK-PE | DAPI | CD45-APC | HER-2/neu |
|----------|----------|------------|-------|------|----------|-----------|
| 5563     | 43       |            |       |      |          |           |
| 5564     | 43       |            |       |      |          |           |
| 5565     | 43       |            |       |      |          |           |
| 5566     | 43       |            |       |      |          |           |
| 5567     | 43       |            |       |      |          |           |
| 5568     | 43       |            |       |      |          |           |
| 5569     | 43       |            |       |      |          |           |
| 5570     | 43       |            |       |      |          |           |
| 5571     | 43       |            |       |      |          |           |
| 5572     | 43       |            |       |      |          |           |
| 5573     | 43       |            |       |      |          |           |

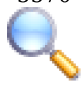

| Ereignis | Aufnahme | DAPI/CK-PE | CK-PE | DAPI | CD45-APC | HER-2/neu |
|----------|----------|------------|-------|------|----------|-----------|
| 5574     | 43       |            |       |      |          |           |
| 5575     | 43       |            |       |      |          |           |
| 5576     | 43       |            |       |      |          |           |
| 5577     | 43       |            |       |      |          |           |
| 5578     | 43       |            |       |      |          |           |
| 5579     | 43       |            |       |      |          |           |
| 5580     | 43       |            |       |      |          |           |
| 5581     | 43       |            |       |      |          |           |
| 5582     | 43       |            |       |      |          |           |
| 5583     | 43       |            |       |      |          |           |
| 5584     | 43       |            |       |      |          |           |
| 5585     | 43       |            |       |      |          |           |
| 5586     | 43       |            |       |      |          |           |



| Ereignis | Aufnahme | DAPI/CK-PE | CK-PE | DAPI | CD45-APC | HER-2/neu |
|----------|----------|------------|-------|------|----------|-----------|
| 5587     | 43       |            |       |      |          |           |
| 5588     | 43       |            |       |      |          |           |
| 5589     | 43       |            |       |      |          |           |
| 5590     | 43       |            |       |      |          |           |
| 5591     | 43       |            |       |      |          |           |
| 5592     | 43       |            |       |      |          |           |
| 5593     | 43       |            |       |      |          |           |
| 5594     | 43       |            |       |      |          |           |
| 5595     | 43       |            |       |      |          |           |
| 5596     | 43       |            |       |      |          |           |
| 5597     | 43       |            |       |      |          |           |

| Ereignis | Aufnahme | DAPI/CK-PE | CK-PE | DAPI | CD45-APC | HER-2/neu |
|----------|----------|------------|-------|------|----------|-----------|
| 5598     | 43       |            |       |      |          |           |
| 5599     | 43       |            |       |      |          |           |
| 5600     | 43       |            |       |      |          |           |
| 5601     | 43       |            |       |      |          |           |
| 5602     | 43       |            |       |      |          |           |
| 5603     | 43       |            |       |      |          |           |
| 5604     | 43       |            |       |      |          |           |
| 5605     | 43       |            |       |      |          |           |
| 5606     | 43       |            |       |      |          |           |
| 5607     | 43       |            |       |      |          |           |
| 5608     | 43       |            |       |      |          |           |
| 5609     | 43       |            |       |      |          |           |
| 5610     | 43       |            |       |      |          |           |

| Ereignis | Aufnahme | DAPI/CK-PE | CK-PE | DAPI | CD45-APC | HER-2/neu |
|----------|----------|------------|-------|------|----------|-----------|
| 5611     | 43       |            |       |      |          |           |
| 5612     | 43       |            |       |      |          |           |
| 5613     | 43       |            |       |      |          |           |
| 5614     | 43       |            |       |      |          |           |
| 5615     | 43       |            |       |      |          |           |
| 5616     | 43       |            |       |      |          |           |
| 5617     | 43       |            |       |      |          |           |
| 5618     | 43       |            |       |      |          |           |
| 5619     | 43       |            |       |      |          |           |

| Ereignis | Aufnahme | DAPI/CK-PE | CK-PE | DAPI | CD45-APC | HER-2/neu |
|----------|----------|------------|-------|------|----------|-----------|
| 5620     | 43       |            |       |      |          |           |
|          |          |            |       |      |          |           |
| 5621     | 43       |            |       |      |          |           |
| 5622     | 43       |            |       |      |          |           |
| 5623     | 43       |            |       |      |          |           |
|          |          |            |       |      |          |           |
| 5624     | 43       |            |       |      |          |           |
| 5625     | 43       |            |       |      |          |           |
| 5626     | 43       |            |       |      |          |           |
| 5627     | 43       |            |       |      |          |           |
| 5628     | 43       |            |       |      |          |           |
| 5629     | 43       |            |       |      |          |           |
| 5630     | 43       |            |       |      |          |           |



| Ereignis | Aufnahme | DAPI/CK-PE | CK-PE | DAPI | CD45-APC | HER-2/neu |
|----------|----------|------------|-------|------|----------|-----------|
| 5631     | 43       |            |       |      |          |           |
| 5632     | 43       |            |       |      |          |           |
| 5633     | 43       |            |       |      |          |           |
| 5634     | 43       |            |       |      |          |           |
| 5635     | 43       |            |       |      |          |           |
| 5636     | 43       |            |       |      |          |           |
| 5637     | 43       |            |       |      |          |           |
| 5638     | 43       |            |       |      |          |           |
| 5639     | 43       |            |       |      |          |           |
| 5640     | 43       |            |       |      |          |           |
| 5641     | 43       |            |       |      |          |           |

| Ereignis                                                                                 | Aufnahme | DAPI/CK-PE | CK-PE | DAPI | CD45-APC | HER-2/neu |
|------------------------------------------------------------------------------------------|----------|------------|-------|------|----------|-----------|
| 5642                                                                                     | 43       |            |       |      |          |           |
| 5643                                                                                     | 43       |            |       |      |          |           |
| 5644                                                                                     | 43       |            |       |      |          |           |
| 5645                                                                                     | 43       |            |       |      |          |           |
|  5646   | 42       |            |       |      |          |           |
| 5647                                                                                     | 42       |            |       |      |          |           |
|  5648 | 28       |            |       |      |          |           |
|  5649 | 28       |            |       |      |          |           |
| 5650                                                                                     | 28       |            |       |      |          |           |
| 5651                                                                                     | 42       |            |       |      |          |           |

| Ereignis | Aufnahme | DAPI/CK-PE | CK-PE | DAPI | CD45-APC | HER-2/neu |
|----------|----------|------------|-------|------|----------|-----------|
| 5652     | 43       |            |       |      |          |           |
| 5653     | 28       |            |       |      |          |           |
| 5654     | 43       |            |       |      |          |           |
| 5655     | 43       |            |       |      |          |           |
| 5656     | 43       |            |       |      |          |           |
| 5657     | 43       |            |       |      |          |           |
| 5658     | 28       |            |       |      |          |           |
| 5659     | 28       |            |       |      |          |           |
| 5660     | 28       |            |       |      |          |           |
| 5661     | 28       |            |       |      |          |           |

| Ereignis | Aufnahme | DAPI/CK-PE | CK-PE | DAPI | CD45-APC | HER-2/neu |
|----------|----------|------------|-------|------|----------|-----------|
| 5662     | 44       |            |       |      |          |           |
| 5663     | 44       |            |       |      |          |           |
| 5664     | 44       |            |       |      |          |           |
| 5665     | 44       |            |       |      |          |           |
| 5666     | 44       |            |       |      |          |           |
| 5667     | 44       |            |       |      |          |           |
| 5668     | 44       |            |       |      |          |           |
| 5669     | 44       |            |       |      |          |           |
| 5670     | 44       |            |       |      |          |           |
| 5671     | 44       |            |       |      |          |           |
| 5672     | 44       |            |       |      |          |           |
| 5673     | 44       |            |       |      |          |           |



| Ereignis | Aufnahme | DAPI/CK-PE                                                                          | CK-PE                                                                               | DAPI                                                                                 | CD45-APC                                                                              | HER-2/neu                                                                             |
|----------|----------|-------------------------------------------------------------------------------------|-------------------------------------------------------------------------------------|--------------------------------------------------------------------------------------|---------------------------------------------------------------------------------------|---------------------------------------------------------------------------------------|
| 5674     | 44       | 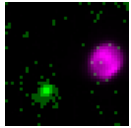   |    |    |    |    |
| 5675     | 44       |    |    |    |    |    |
| 5676     | 44       |    |    |    |    |    |
| 5677     | 44       |    |    |    |    |    |
| 5678     | 44       |    |    |    |    |    |
| 5679     | 44       |    |    |    |    |    |
| 5680     | 44       |   |   |   |   |   |
| 5681     | 44       |  |  |  |  |  |
| 5682     | 44       |  |  |  |  |  |
| 5683     | 44       |  |  |  |  |  |
| 5684     | 44       |  |  |  |  |  |
| 5685     | 44       |  |  |  |  |  |

| Ereignis | Aufnahme | DAPI/CK-PE                                                                          | CK-PE                                                                               | DAPI                                                                                 | CD45-APC                                                                              | HER-2/neu                                                                             |
|----------|----------|-------------------------------------------------------------------------------------|-------------------------------------------------------------------------------------|--------------------------------------------------------------------------------------|---------------------------------------------------------------------------------------|---------------------------------------------------------------------------------------|
| 5686     | 44       | 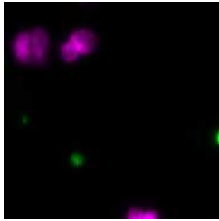   |    |    |    |    |
| 5687     | 44       |    |    |    |    |    |
| 5688     | 44       |    |    |    |    |    |
| 5689     | 44       |    |    |    |    |    |
| 5690     | 44       |    |    |    |    |    |
| 5691     | 44       |   |   |   |   |   |
| 5692     | 44       |  |  |  |  |  |
| 5693     | 44       |  |  |  |  |  |
| 5694     | 44       |  |  |  |  |  |
| 5695     | 44       |  |  |  |  |  |
| 5696     | 44       |  |  |  |  |  |
| 5697     | 44       |  |  |  |  |  |

| Ereignis                                                                                 | Aufnahme | DAPI/CK-PE | CK-PE | DAPI | CD45-APC | HER-2/neu |
|------------------------------------------------------------------------------------------|----------|------------|-------|------|----------|-----------|
| 5698                                                                                     | 44       |            |       |      |          |           |
|  5699   | 44       |            |       |      |          |           |
| 5700                                                                                     | 44       |            |       |      |          |           |
| 5701                                                                                     | 44       |            |       |      |          |           |
| 5702                                                                                     | 44       |            |       |      |          |           |
|  5703 | 44       |            |       |      |          |           |
| 5704                                                                                     | 44       |            |       |      |          |           |
| 5705                                                                                     | 44       |            |       |      |          |           |
| 5706                                                                                     | 44       |            |       |      |          |           |
| 5707                                                                                     | 44       |            |       |      |          |           |
| 5708                                                                                     | 44       |            |       |      |          |           |
| 5709                                                                                     | 44       |            |       |      |          |           |

| Ereignis | Aufnahme | DAPI/CK-PE | CK-PE | DAPI | CD45-APC | HER-2/neu |
|----------|----------|------------|-------|------|----------|-----------|
| 5710     | 44       |            |       |      |          |           |
| 5711     | 44       |            |       |      |          |           |
|          |          |            |       |      |          |           |
| 5712     | 44       |            |       |      |          |           |
| 5713     | 44       |            |       |      |          |           |
| 5714     | 44       |            |       |      |          |           |
| 5715     | 44       |            |       |      |          |           |
| 5716     | 44       |            |       |      |          |           |
| 5717     | 44       |            |       |      |          |           |
| 5718     | 44       |            |       |      |          |           |
| 5719     | 44       |            |       |      |          |           |
| 5720     | 44       |            |       |      |          |           |
|          |          |            |       |      |          |           |
| 5721     | 44       |            |       |      |          |           |



| Ereignis | Aufnahme | DAPI/CK-PE | CK-PE | DAPI | CD45-APC | HER-2/neu |
|----------|----------|------------|-------|------|----------|-----------|
| 5722     | 44       |            |       |      |          |           |
| 5723     | 44       |            |       |      |          |           |
| 5724     | 44       |            |       |      |          |           |
| 5725     | 44       |            |       |      |          |           |
| 5726     | 44       |            |       |      |          |           |
| 5727     | 44       |            |       |      |          |           |
| 5728     | 44       |            |       |      |          |           |
| 5729     | 44       |            |       |      |          |           |
| 5730     | 44       |            |       |      |          |           |
| 5731     | 44       |            |       |      |          |           |
| 5732     | 44       |            |       |      |          |           |

| Ereignis | Aufnahme | DAPI/CK-PE | CK-PE | DAPI | CD45-APC | HER-2/neu |
|----------|----------|------------|-------|------|----------|-----------|
| 5733     | 44       |            |       |      |          |           |
| 5734     | 44       |            |       |      |          |           |
| 5735     | 44       |            |       |      |          |           |
| 5736     | 44       |            |       |      |          |           |
| 5737     | 44       |            |       |      |          |           |
| 5738     | 44       |            |       |      |          |           |
| 5739     | 44       |            |       |      |          |           |
| 5740     | 44       |            |       |      |          |           |
| 5741     | 44       |            |       |      |          |           |
| 5742     | 44       |            |       |      |          |           |
| 5743     | 44       |            |       |      |          |           |

| Ereignis                                                                               | Aufnahme | DAPI/CK-PE | CK-PE | DAPI | CD45-APC | HER-2/neu |
|----------------------------------------------------------------------------------------|----------|------------|-------|------|----------|-----------|
| 5744                                                                                   | 44       |            |       |      |          |           |
| 5745                                                                                   | 44       |            |       |      |          |           |
| 5746                                                                                   | 44       |            |       |      |          |           |
| 5747                                                                                   | 44       |            |       |      |          |           |
|  5748 | 44       |            |       |      |          |           |
| 5749                                                                                   | 44       |            |       |      |          |           |
| 5750                                                                                   | 44       |            |       |      |          |           |
| 5751                                                                                   | 44       |            |       |      |          |           |
| 5752                                                                                   | 44       |            |       |      |          |           |
| 5753                                                                                   | 44       |            |       |      |          |           |
| 5754                                                                                   | 44       |            |       |      |          |           |
| 5755                                                                                   | 44       |            |       |      |          |           |
| 5756                                                                                   | 44       |            |       |      |          |           |

| Ereignis | Aufnahme | DAPI/CK-PE | CK-PE | DAPI | CD45-APC | HER-2/neu |
|----------|----------|------------|-------|------|----------|-----------|
| 5757     | 44       |            |       |      |          |           |
| 5758     | 44       |            |       |      |          |           |
| 5759     | 44       |            |       |      |          |           |
| 5760     | 44       |            |       |      |          |           |
| 5761     | 44       |            |       |      |          |           |
| 5762     | 44       |            |       |      |          |           |
| 5763     | 44       |            |       |      |          |           |
| 5764     | 44       |            |       |      |          |           |
| 5765     | 44       |            |       |      |          |           |
| 5766     | 44       |            |       |      |          |           |
| 5767     | 44       |            |       |      |          |           |
| 5768     | 44       |            |       |      |          |           |





| Ereignis                                                                                 | Aufnahme | DAPI/CK-PE | CK-PE | DAPI | CD45-APC | HER-2/neu |
|------------------------------------------------------------------------------------------|----------|------------|-------|------|----------|-----------|
| 5769                                                                                     | 44       |            |       |      |          |           |
| 5770                                                                                     | 44       |            |       |      |          |           |
| 5771                                                                                     | 44       |            |       |      |          |           |
| 5772                                                                                     | 44       |            |       |      |          |           |
| 5773                                                                                     | 44       |            |       |      |          |           |
| 5774                                                                                     | 44       |            |       |      |          |           |
| 5775                                                                                     | 44       |            |       |      |          |           |
|  5776 | 44       |            |       |      |          |           |
| 5777                                                                                     | 44       |            |       |      |          |           |
| 5778                                                                                     | 44       |            |       |      |          |           |
|  5779 | 44       |            |       |      |          |           |

| Ereignis | Aufnahme | DAPI/CK-PE | CK-PE | DAPI | CD45-APC | HER-2/neu |
|----------|----------|------------|-------|------|----------|-----------|
| 5780     | 44       |            |       |      |          |           |
| 5781     | 44       |            |       |      |          |           |
| 5782     | 44       |            |       |      |          |           |
| 5783     | 44       |            |       |      |          |           |
| 5784     | 44       |            |       |      |          |           |
| 5785     | 44       |            |       |      |          |           |
| 5786     | 44       |            |       |      |          |           |
| 5787     | 44       |            |       |      |          |           |
| 5788     | 44       |            |       |      |          |           |
| 5789     | 44       |            |       |      |          |           |
| 5790     | 44       |            |       |      |          |           |

| Ereignis | Aufnahme | DAPI/CK-PE | CK-PE | DAPI | CD45-APC | HER-2/neu |
|----------|----------|------------|-------|------|----------|-----------|
| 5791     | 44       |            |       |      |          |           |
| 5792     | 44       |            |       |      |          |           |
| 5793     | 44       |            |       |      |          |           |
| 5794     | 44       |            |       |      |          |           |
| 5795     | 44       |            |       |      |          |           |
| 5796     | 44       |            |       |      |          |           |
| 5797     | 44       |            |       |      |          |           |
| 5798     | 44       |            |       |      |          |           |
| 5799     | 44       |            |       |      |          |           |
| 5800     | 44       |            |       |      |          |           |
| 5801     | 44       |            |       |      |          |           |
| 5802     | 44       |            |       |      |          |           |

| Ereignis | Aufnahme | DAPI/CK-PE | CK-PE | DAPI | CD45-APC | HER-2/neu |
|----------|----------|------------|-------|------|----------|-----------|
| 5803     | 44       |            |       |      |          |           |
| 5804     | 44       |            |       |      |          |           |
| 5805     | 44       |            |       |      |          |           |
| 5806     | 44       |            |       |      |          |           |
| 5807     | 44       |            |       |      |          |           |
| 5808     | 44       |            |       |      |          |           |
| 5809     | 44       |            |       |      |          |           |
| 5810     | 44       |            |       |      |          |           |
| 5811     | 44       |            |       |      |          |           |
| 5812     | 44       |            |       |      |          |           |
| 5813     | 44       |            |       |      |          |           |
| 5814     | 44       |            |       |      |          |           |
| 5815     | 44       |            |       |      |          |           |



| Ereignis | Aufnahme | DAPI/CK-PE | CK-PE | DAPI | CD45-APC | HER-2/neu |
|----------|----------|------------|-------|------|----------|-----------|
| 5816     | 44       |            |       |      |          |           |
| 5817     | 44       |            |       |      |          |           |
| 5818     | 44       |            |       |      |          |           |
| 5819     | 44       |            |       |      |          |           |
| 5820     | 44       |            |       |      |          |           |
| 5821     | 44       |            |       |      |          |           |
| 5822     | 44       |            |       |      |          |           |
| 5823     | 44       |            |       |      |          |           |
| 5824     | 44       |            |       |      |          |           |
| 5825     | 44       |            |       |      |          |           |
| 5826     | 44       |            |       |      |          |           |
| 5827     | 44       |            |       |      |          |           |

| Ereignis                                                                                 | Aufnahme | DAPI/CK-PE                                                                          | CK-PE                                                                               | DAPI                                                                                 | CD45-APC                                                                              | HER-2/neu                                                                             |
|------------------------------------------------------------------------------------------|----------|-------------------------------------------------------------------------------------|-------------------------------------------------------------------------------------|--------------------------------------------------------------------------------------|---------------------------------------------------------------------------------------|---------------------------------------------------------------------------------------|
| 5828    | 44       |    |    |    |    |    |
| 5829    | 44       |    |    |    |    |    |
| 5830                                                                                     | 44       |    |    |    |    |    |
| 5831                                                                                     | 44       |    |    |    |    |    |
| 5832   | 44       |   |   |   |   |   |
| 5833  | 44       |  |  |  |  |  |
| 5834                                                                                     | 44       |  |  |  |  |  |
| 5835                                                                                     | 44       |  |  |  |  |  |
| 5836                                                                                     | 44       |  |  |  |  |  |
| 5837  | 44       |  |  |  |  |  |

| Ereignis | Aufnahme | DAPI/CK-PE | CK-PE | DAPI | CD45-APC | HER-2/neu |
|----------|----------|------------|-------|------|----------|-----------|
| 5838     | 44       |            |       |      |          |           |
| 5839     | 44       |            |       |      |          |           |
| 5840     | 44       |            |       |      |          |           |
| 5841     | 44       |            |       |      |          |           |
| 5842     | 44       |            |       |      |          |           |
| 5843     | 44       |            |       |      |          |           |
| 5844     | 44       |            |       |      |          |           |
| 5845     | 44       |            |       |      |          |           |
| 5846     | 44       |            |       |      |          |           |
| 5847     | 44       |            |       |      |          |           |

| Ereignis                                                                                 | Aufnahme | DAPI/CK-PE                                                                          | CK-PE                                                                               | DAPI                                                                                 | CD45-APC                                                                              | HER-2/neu                                                                             |
|------------------------------------------------------------------------------------------|----------|-------------------------------------------------------------------------------------|-------------------------------------------------------------------------------------|--------------------------------------------------------------------------------------|---------------------------------------------------------------------------------------|---------------------------------------------------------------------------------------|
| 5848    | 44       |    |    |    |    |    |
| 5849    | 44       |    |    |    |    |    |
| 5850                                                                                     | 44       |    |    |    |    |    |
| 5851                                                                                     | 44       |    |    |    |    |    |
| 5852                                                                                     | 44       |    |    |    |    |    |
| 5853                                                                                     | 44       |   |   |   |   |   |
| 5854  | 44       |  |  |  |  |  |
| 5855                                                                                     | 44       |  |  |  |  |  |
| 5856                                                                                     | 44       |  |  |  |  |  |
| 5857  | 44       |  |  |  |  |  |
| 5858                                                                                     | 44       |  |  |  |  |  |



| Ereignis                                                                                 | Aufnahme | DAPI/CK-PE | CK-PE | DAPI | CD45-APC | HER-2/neu |
|------------------------------------------------------------------------------------------|----------|------------|-------|------|----------|-----------|
| 5859                                                                                     | 44       |            |       |      |          |           |
| 5860                                                                                     | 44       |            |       |      |          |           |
|  5861   | 44       |            |       |      |          |           |
| 5862                                                                                     | 44       |            |       |      |          |           |
| 5863                                                                                     | 44       |            |       |      |          |           |
| 5864                                                                                     | 44       |            |       |      |          |           |
| 5865                                                                                     | 44       |            |       |      |          |           |
| 5866                                                                                     | 44       |            |       |      |          |           |
|  5867 | 44       |            |       |      |          |           |
| 5868                                                                                     | 44       |            |       |      |          |           |
| 5869                                                                                     | 44       |            |       |      |          |           |
| 5870                                                                                     | 44       |            |       |      |          |           |

| Ereignis                                                                                 | Aufnahme | DAPI/CK-PE | CK-PE | DAPI | CD45-APC | HER-2/neu |
|------------------------------------------------------------------------------------------|----------|------------|-------|------|----------|-----------|
| 5871                                                                                     | 44       |            |       |      |          |           |
| 5872                                                                                     | 44       |            |       |      |          |           |
| 5873                                                                                     | 44       |            |       |      |          |           |
| 5874                                                                                     | 44       |            |       |      |          |           |
|  5875   | 44       |            |       |      |          |           |
| 5876                                                                                     | 44       |            |       |      |          |           |
| 5877                                                                                     | 44       |            |       |      |          |           |
|  5878 | 44       |            |       |      |          |           |
|  5879 | 43       |            |       |      |          |           |
|  5880 | 27       |            |       |      |          |           |

| Ereignis | Aufnahme | DAPI/CK-PE | CK-PE | DAPI | CD45-APC | HER-2/neu |
|----------|----------|------------|-------|------|----------|-----------|
| 5881     | 27       |            |       |      |          |           |
| 5882     | 27       |            |       |      |          |           |
| 5883     | 44       |            |       |      |          |           |
| 5884     | 44       |            |       |      |          |           |
| 5885     | 44       |            |       |      |          |           |
| 5886     | 27       |            |       |      |          |           |
| 5887     | 27       |            |       |      |          |           |
| 5888     | 44       |            |       |      |          |           |
| 5889     | 27       |            |       |      |          |           |
| 5890     | 27       |            |       |      |          |           |

| Ereignis                                                                               | Aufnahme | DAPI/CK-PE | CK-PE | DAPI | CD45-APC | HER-2/neu |
|----------------------------------------------------------------------------------------|----------|------------|-------|------|----------|-----------|
| 5891                                                                                   | 44       |            |       |      |          |           |
| 5892                                                                                   | 45       |            |       |      |          |           |
| 5893                                                                                   | 45       |            |       |      |          |           |
| 5894                                                                                   | 45       |            |       |      |          |           |
|  5895 | 45       |            |       |      |          |           |
| 5896                                                                                   | 45       |            |       |      |          |           |
| 5897                                                                                   | 45       |            |       |      |          |           |
| 5898                                                                                   | 45       |            |       |      |          |           |
| 5899                                                                                   | 45       |            |       |      |          |           |
| 5900                                                                                   | 45       |            |       |      |          |           |
| 5901                                                                                   | 45       |            |       |      |          |           |
| 5902                                                                                   | 45       |            |       |      |          |           |



| Ereignis | Aufnahme | DAPI/CK-PE | CK-PE | DAPI | CD45-APC | HER-2/neu |
|----------|----------|------------|-------|------|----------|-----------|
| 5903     | 45       |            |       |      |          |           |
| 5904     | 45       |            |       |      |          |           |
| 5905     | 45       |            |       |      |          |           |
| 5906     | 45       |            |       |      |          |           |
| 5907     | 45       |            |       |      |          |           |
| 5908     | 45       |            |       |      |          |           |
| 5909     | 45       |            |       |      |          |           |
| 5910     | 45       |            |       |      |          |           |
| 5911     | 45       |            |       |      |          |           |
| 5912     | 45       |            |       |      |          |           |
| 5913     | 45       |            |       |      |          |           |
| 5914     | 45       |            |       |      |          |           |

| Ereignis | Aufnahme | DAPI/CK-PE | CK-PE | DAPI | CD45-APC | HER-2/neu |
|----------|----------|------------|-------|------|----------|-----------|
| 5915     | 45       |            |       |      |          |           |
| 5916     | 45       |            |       |      |          |           |
| 5917     | 45       |            |       |      |          |           |
| 5918     | 45       |            |       |      |          |           |
| 5919     | 45       |            |       |      |          |           |
| 5920     | 45       |            |       |      |          |           |
| 5921     | 45       |            |       |      |          |           |
| 5922     | 45       |            |       |      |          |           |
| 5923     | 45       |            |       |      |          |           |
| 5924     | 45       |            |       |      |          |           |
| 5925     | 45       |            |       |      |          |           |

| Ereignis | Aufnahme | DAPI/CK-PE | CK-PE | DAPI | CD45-APC | HER-2/neu |
|----------|----------|------------|-------|------|----------|-----------|
| 5926     | 45       |            |       |      |          |           |
| 5927     | 45       |            |       |      |          |           |
| 5928     | 45       |            |       |      |          |           |
| 5929     | 45       |            |       |      |          |           |
| 5930     | 45       |            |       |      |          |           |
| 5931     | 45       |            |       |      |          |           |
| 5932     | 45       |            |       |      |          |           |
| 5933     | 45       |            |       |      |          |           |
| 5934     | 45       |            |       |      |          |           |
| 5935     | 45       |            |       |      |          |           |
| 5936     | 45       |            |       |      |          |           |
| 5937     | 45       |            |       |      |          |           |

| Ereignis | Aufnahme | DAPI/CK-PE | CK-PE | DAPI | CD45-APC | HER-2/neu |
|----------|----------|------------|-------|------|----------|-----------|
| 5938     | 45       |            |       |      |          |           |
| 5939     | 45       |            |       |      |          |           |
| 5940     | 45       |            |       |      |          |           |
| 5941     | 45       |            |       |      |          |           |
| 5942     | 45       |            |       |      |          |           |
| 5943     | 45       |            |       |      |          |           |
| 5944     | 45       |            |       |      |          |           |
| 5945     | 45       |            |       |      |          |           |
| 5946     | 45       |            |       |      |          |           |
| 5947     | 45       |            |       |      |          |           |
| 5948     | 45       |            |       |      |          |           |
| 5949     | 45       |            |       |      |          |           |
| 5950     | 45       |            |       |      |          |           |



| Ereignis | Aufnahme | DAPI/CK-PE | CK-PE | DAPI | CD45-APC | HER-2/neu |
|----------|----------|------------|-------|------|----------|-----------|
| 5951     | 45       |            |       |      |          |           |
| 5952     | 45       |            |       |      |          |           |
| 5953     | 45       |            |       |      |          |           |
| 5954     | 45       |            |       |      |          |           |
| 5955     | 45       |            |       |      |          |           |
| 5956     | 45       |            |       |      |          |           |
| 5957     | 45       |            |       |      |          |           |
| 5958     | 45       |            |       |      |          |           |
| 5959     | 45       |            |       |      |          |           |
| 5960     | 45       |            |       |      |          |           |
| 5961     | 45       |            |       |      |          |           |
| 5962     | 45       |            |       |      |          |           |

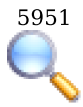

| Ereignis                                                                               | Aufnahme | DAPI/CK-PE | CK-PE | DAPI | CD45-APC | HER-2/neu |
|----------------------------------------------------------------------------------------|----------|------------|-------|------|----------|-----------|
| 5963                                                                                   | 45       |            |       |      |          |           |
| 5964                                                                                   | 45       |            |       |      |          |           |
| 5965                                                                                   | 45       |            |       |      |          |           |
| 5966                                                                                   | 45       |            |       |      |          |           |
|  5967 | 45       |            |       |      |          |           |
| 5968                                                                                   | 45       |            |       |      |          |           |
| 5969                                                                                   | 45       |            |       |      |          |           |
| 5970                                                                                   | 45       |            |       |      |          |           |
| 5971                                                                                   | 45       |            |       |      |          |           |
| 5972                                                                                   | 45       |            |       |      |          |           |
| 5973                                                                                   | 45       |            |       |      |          |           |
| 5974                                                                                   | 45       |            |       |      |          |           |
| 5975                                                                                   | 45       |            |       |      |          |           |

| Ereignis | Aufnahme | DAPI/CK-PE | CK-PE | DAPI | CD45-APC | HER-2/neu |
|----------|----------|------------|-------|------|----------|-----------|
| 5976     | 45       |            |       |      |          |           |
| 5977     | 45       |            |       |      |          |           |
| 5978     | 45       |            |       |      |          |           |
| 5979     | 45       |            |       |      |          |           |
| 5980     | 45       |            |       |      |          |           |
| 5981     | 45       |            |       |      |          |           |
| 5982     | 45       |            |       |      |          |           |
| 5983     | 45       |            |       |      |          |           |
| 5984     | 45       |            |       |      |          |           |
| 5985     | 45       |            |       |      |          |           |
| 5986     | 45       |            |       |      |          |           |

| Ereignis | Aufnahme | DAPI/CK-PE | CK-PE | DAPI | CD45-APC | HER-2/neu |
|----------|----------|------------|-------|------|----------|-----------|
| 5987     | 45       |            |       |      |          |           |
| 5988     | 45       |            |       |      |          |           |
| 5989     | 45       |            |       |      |          |           |
| 5990     | 45       |            |       |      |          |           |
| 5991     | 45       |            |       |      |          |           |
| 5992     | 45       |            |       |      |          |           |
| 5993     | 45       |            |       |      |          |           |
| 5994     | 45       |            |       |      |          |           |
| 5995     | 45       |            |       |      |          |           |
| 5996     | 45       |            |       |      |          |           |
| 5997     | 45       |            |       |      |          |           |
| 5998     | 45       |            |       |      |          |           |



Proben-ID:Gyn14.208

Kassetten-ID:01327106

Druckdatum:02/06/2020 16:41

Patienten-ID:

| Ereignis | Aufnahme | DAPI/CK-PE                                                                        | CK-PE                                                                             | DAPI                                                                               | CD45-APC                                                                            | HER-2/neu                                                                           |
|----------|----------|-----------------------------------------------------------------------------------|-----------------------------------------------------------------------------------|------------------------------------------------------------------------------------|-------------------------------------------------------------------------------------|-------------------------------------------------------------------------------------|
| 5999     | 45       | 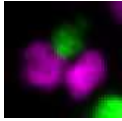 |  |  |  |  |
| 6000     | 45       |  |  |  |  |  |

Proben-ID: Gyn14.208

Kassetten-ID: 01327106

Druckdatum: 02/06/2020 17:00

Patienten-ID:

| Ereignis | Aufnahme | DAPI/CK-PE                                                                          | CK-PE                                                                               | DAPI                                                                                 | CD45-APC                                                                              | HER-2/neu                                                                             |
|----------|----------|-------------------------------------------------------------------------------------|-------------------------------------------------------------------------------------|--------------------------------------------------------------------------------------|---------------------------------------------------------------------------------------|---------------------------------------------------------------------------------------|
| 12001    | 80       | 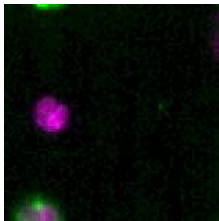   |    |    |    |    |
| 12002    | 80       |    |    |    |    |    |
| 12003    | 80       |    |    |    |    |    |
| 12004    | 80       |    |    |    |    |    |
| 12005    | 80       |   |   |   |   |   |
| 12006    | 80       |  |  |  |  |  |
| 12007    | 80       |  |  |  |  |  |
| 12008    | 80       |  |  |  |  |  |
| 12009    | 80       |  |  |  |  |  |
| 12010    | 80       |  |  |  |  |  |
| 12011    | 80       |  |  |  |  |  |

| Ereignis | Aufnahme | DAPI/CK-PE | CK-PE | DAPI | CD45-APC | HER-2/neu |
|----------|----------|------------|-------|------|----------|-----------|
| 12012    | 80       |            |       |      |          |           |
| 12013    | 80       |            |       |      |          |           |
| 12014    | 80       |            |       |      |          |           |
| 12015    | 80       |            |       |      |          |           |
| 12016    | 80       |            |       |      |          |           |
| 12017    | 80       |            |       |      |          |           |
| 12018    | 80       |            |       |      |          |           |
| 12019    | 80       |            |       |      |          |           |
| 12020    | 80       |            |       |      |          |           |
| 12021    | 80       |            |       |      |          |           |
| 12022    | 80       |            |       |      |          |           |
| 12023    | 80       |            |       |      |          |           |
| 12024    | 80       |            |       |      |          |           |
| 12025    | 80       |            |       |      |          |           |

| Ereignis | Aufnahme | DAPI/CK-PE | CK-PE | DAPI | CD45-APC | HER-2/neu |
|----------|----------|------------|-------|------|----------|-----------|
| 12026    | 80       |            |       |      |          |           |
| 12027    | 80       |            |       |      |          |           |
| 12028    | 80       |            |       |      |          |           |
| 12029    | 80       |            |       |      |          |           |
| 12030    | 80       |            |       |      |          |           |
| 12031    | 80       |            |       |      |          |           |
| 12032    | 61       |            |       |      |          |           |
| 12033    | 80       |            |       |      |          |           |
| 12034    | 61       |            |       |      |          |           |
| 12035    | 80       |            |       |      |          |           |
| 12036    | 61       |            |       |      |          |           |



| Ereignis | Aufnahme | DAPI/CK-PE | CK-PE | DAPI | CD45-APC | HER-2/neu |
|----------|----------|------------|-------|------|----------|-----------|
| 12037    | 61       |            |       |      |          |           |
| 12038    | 81       |            |       |      |          |           |
| 12039    | 81       |            |       |      |          |           |
| 12040    | 81       |            |       |      |          |           |
| 12041    | 81       |            |       |      |          |           |
| 12042    | 81       |            |       |      |          |           |
| 12043    | 81       |            |       |      |          |           |
| 12044    | 81       |            |       |      |          |           |
| 12045    | 81       |            |       |      |          |           |
| 12046    | 81       |            |       |      |          |           |
| 12047    | 81       |            |       |      |          |           |

| Ereignis | Aufnahme | DAPI/CK-PE | CK-PE | DAPI | CD45-APC | HER-2/neu |
|----------|----------|------------|-------|------|----------|-----------|
| 12048    | 81       |            |       |      |          |           |
| 12049    | 81       |            |       |      |          |           |
| 12050    | 81       |            |       |      |          |           |
| 12051    | 81       |            |       |      |          |           |
| 12052    | 81       |            |       |      |          |           |
| 12053    | 81       |            |       |      |          |           |
| 12054    | 81       |            |       |      |          |           |
| 12055    | 81       |            |       |      |          |           |
| 12056    | 81       |            |       |      |          |           |
| 12057    | 81       |            |       |      |          |           |
| 12058    | 81       |            |       |      |          |           |
| 12059    | 81       |            |       |      |          |           |
| 12060    | 81       |            |       |      |          |           |

| Ereignis | Aufnahme | DAPI/CK-PE | CK-PE | DAPI | CD45-APC | HER-2/neu |
|----------|----------|------------|-------|------|----------|-----------|
| 12061    | 81       |            |       |      |          |           |
| 12062    | 81       |            |       |      |          |           |
| 12063    | 81       |            |       |      |          |           |
| 12064    | 81       |            |       |      |          |           |
| 12065    | 81       |            |       |      |          |           |
| 12066    | 81       |            |       |      |          |           |
| 12067    | 81       |            |       |      |          |           |
| 12068    | 81       |            |       |      |          |           |
| 12069    | 81       |            |       |      |          |           |
| 12070    | 81       |            |       |      |          |           |
| 12071    | 81       |            |       |      |          |           |

| Ereignis | Aufnahme | DAPI/CK-PE | CK-PE | DAPI | CD45-APC | HER-2/neu |
|----------|----------|------------|-------|------|----------|-----------|
| 12072    | 81       |            |       |      |          |           |
| 12073    | 81       |            |       |      |          |           |
| 12074    | 81       |            |       |      |          |           |
| 12075    | 81       |            |       |      |          |           |
| 12076    | 81       |            |       |      |          |           |
| 12077    | 81       |            |       |      |          |           |
| 12078    | 81       |            |       |      |          |           |
| 12079    | 81       |            |       |      |          |           |
| 12080    | 81       |            |       |      |          |           |
| 12081    | 81       |            |       |      |          |           |
| 12082    | 81       |            |       |      |          |           |
| 12083    | 81       |            |       |      |          |           |

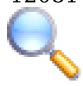



| Ereignis | Aufnahme | DAPI/CK-PE | CK-PE | DAPI | CD45-APC | HER-2/neu |
|----------|----------|------------|-------|------|----------|-----------|
| 12084    | 81       |            |       |      |          |           |
| 12085    | 81       |            |       |      |          |           |
| 12086    | 81       |            |       |      |          |           |
| 12087    | 81       |            |       |      |          |           |
| 12088    | 81       |            |       |      |          |           |
| 12089    | 81       |            |       |      |          |           |
| 12090    | 81       |            |       |      |          |           |
| 12091    | 81       |            |       |      |          |           |
| 12092    | 81       |            |       |      |          |           |
| 12093    | 81       |            |       |      |          |           |
| 12094    | 81       |            |       |      |          |           |
| 12095    | 81       |            |       |      |          |           |

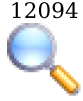

| Ereignis | Aufnahme | DAPI/CK-PE | CK-PE | DAPI | CD45-APC | HER-2/neu |
|----------|----------|------------|-------|------|----------|-----------|
| 12096    | 81       |            |       |      |          |           |
| 12097    | 81       |            |       |      |          |           |
| 12098    | 81       |            |       |      |          |           |
| 12099    | 81       |            |       |      |          |           |
| 12100    | 81       |            |       |      |          |           |
| 12101    | 81       |            |       |      |          |           |
| 12102    | 81       |            |       |      |          |           |
| 12103    | 81       |            |       |      |          |           |
| 12104    | 81       |            |       |      |          |           |
| 12105    | 81       |            |       |      |          |           |
| 12106    | 81       |            |       |      |          |           |
| 12107    | 81       |            |       |      |          |           |
| 12108    | 81       |            |       |      |          |           |

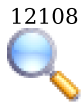

| Ereignis | Aufnahme | DAPI/CK-PE | CK-PE | DAPI | CD45-APC | HER-2/neu |
|----------|----------|------------|-------|------|----------|-----------|
| 12109    | 81       |            |       |      |          |           |
| 12110    | 81       |            |       |      |          |           |
| 12111    | 81       |            |       |      |          |           |
| 12112    | 81       |            |       |      |          |           |
| 12113    | 81       |            |       |      |          |           |
| 12114    | 81       |            |       |      |          |           |
| 12115    | 81       |            |       |      |          |           |
| 12116    | 81       |            |       |      |          |           |
| 12117    | 81       |            |       |      |          |           |
| 12118    | 81       |            |       |      |          |           |

| Ereignis                                                                                  | Aufnahme | DAPI/CK-PE                                                                          | CK-PE                                                                               | DAPI                                                                                 | CD45-APC                                                                              | HER-2/neu                                                                             |
|-------------------------------------------------------------------------------------------|----------|-------------------------------------------------------------------------------------|-------------------------------------------------------------------------------------|--------------------------------------------------------------------------------------|---------------------------------------------------------------------------------------|---------------------------------------------------------------------------------------|
| 12119    | 81       |    |    |    |    |    |
| 12120                                                                                     | 81       |    |    |    |    |    |
| 12121                                                                                     | 81       |    |    |    |    |    |
| 12122                                                                                     | 81       |    |    |    |    |    |
| 12123   | 81       |   |   |   |   |   |
| 12124  | 81       |  |  |  |  |  |
| 12125                                                                                     | 81       |  |  |  |  |  |
| 12126                                                                                     | 81       |  |  |  |  |  |
| 12127                                                                                     | 81       |  |  |  |  |  |
| 12128                                                                                     | 81       |  |  |  |  |  |



| Ereignis | Aufnahme | DAPI/CK-PE | CK-PE | DAPI | CD45-APC | HER-2/neu |
|----------|----------|------------|-------|------|----------|-----------|
| 12129    | 81       |            |       |      |          |           |
| 12130    | 81       |            |       |      |          |           |
| 12131    | 81       |            |       |      |          |           |
| 12132    | 81       |            |       |      |          |           |
| 12133    | 81       |            |       |      |          |           |
| 12134    | 81       |            |       |      |          |           |
| 12135    | 81       |            |       |      |          |           |
| 12136    | 81       |            |       |      |          |           |
| 12137    | 81       |            |       |      |          |           |
| 12138    | 81       |            |       |      |          |           |
| 12139    | 81       |            |       |      |          |           |
| 12140    | 81       |            |       |      |          |           |
| 12141    | 81       |            |       |      |          |           |

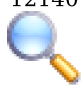

| Ereignis | Aufnahme | DAPI/CK-PE | CK-PE | DAPI | CD45-APC | HER-2/neu |
|----------|----------|------------|-------|------|----------|-----------|
| 12142    | 81       |            |       |      |          |           |
| 12143    | 81       |            |       |      |          |           |
| 12144    | 81       |            |       |      |          |           |
| 12145    | 81       |            |       |      |          |           |
| 12146    | 81       |            |       |      |          |           |
| 12147    | 81       |            |       |      |          |           |
| 12148    | 81       |            |       |      |          |           |
| 12149    | 81       |            |       |      |          |           |
| 12150    | 81       |            |       |      |          |           |
| 12151    | 81       |            |       |      |          |           |

| Ereignis | Aufnahme | DAPI/CK-PE | CK-PE | DAPI | CD45-APC | HER-2/neu |
|----------|----------|------------|-------|------|----------|-----------|
| 12152    | 81       |            |       |      |          |           |
| 12153    | 81       |            |       |      |          |           |
| 12154    | 81       |            |       |      |          |           |
| 12155    | 81       |            |       |      |          |           |
| 12156    | 81       |            |       |      |          |           |
| 12157    | 81       |            |       |      |          |           |
| 12158    | 81       |            |       |      |          |           |
| 12159    | 81       |            |       |      |          |           |
| 12160    | 81       |            |       |      |          |           |
| 12161    | 81       |            |       |      |          |           |

| Ereignis | Aufnahme | DAPI/CK-PE | CK-PE | DAPI | CD45-APC | HER-2/neu |
|----------|----------|------------|-------|------|----------|-----------|
| 12162    | 81       |            |       |      |          |           |
| 12163    | 81       |            |       |      |          |           |
| 12164    | 81       |            |       |      |          |           |
| 12165    | 81       |            |       |      |          |           |
| 12166    | 81       |            |       |      |          |           |
| 12167    | 81       |            |       |      |          |           |
| 12168    | 81       |            |       |      |          |           |
| 12169    | 81       |            |       |      |          |           |
| 12170    | 81       |            |       |      |          |           |
| 12171    | 81       |            |       |      |          |           |
| 12172    | 81       |            |       |      |          |           |



| Ereignis | Aufnahme | DAPI/CK-PE | CK-PE | DAPI | CD45-APC | HER-2/neu |
|----------|----------|------------|-------|------|----------|-----------|
| 12173    | 81       |            |       |      |          |           |
| 12174    | 81       |            |       |      |          |           |
| 12175    | 81       |            |       |      |          |           |
| 12176    | 81       |            |       |      |          |           |
| 12177    | 81       |            |       |      |          |           |
| 12178    | 81       |            |       |      |          |           |
| 12179    | 81       |            |       |      |          |           |
| 12180    | 81       |            |       |      |          |           |
| 12181    | 81       |            |       |      |          |           |
| 12182    | 81       |            |       |      |          |           |
| 12183    | 81       |            |       |      |          |           |

| Ereignis | Aufnahme | DAPI/CK-PE | CK-PE | DAPI | CD45-APC | HER-2/neu |
|----------|----------|------------|-------|------|----------|-----------|
| 12184    | 81       |            |       |      |          |           |
| 12185    | 81       |            |       |      |          |           |
| 12186    | 81       |            |       |      |          |           |
| 12187    | 81       |            |       |      |          |           |
| 12188    | 81       |            |       |      |          |           |
| 12189    | 81       |            |       |      |          |           |
| 12190    | 81       |            |       |      |          |           |
| 12191    | 81       |            |       |      |          |           |
| 12192    | 81       |            |       |      |          |           |
| 12193    | 81       |            |       |      |          |           |
| 12194    | 81       |            |       |      |          |           |

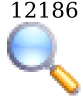

| Ereignis                                                                                  | Aufnahme | DAPI/CK-PE | CK-PE | DAPI | CD45-APC | HER-2/neu |
|-------------------------------------------------------------------------------------------|----------|------------|-------|------|----------|-----------|
| 12195                                                                                     | 81       |            |       |      |          |           |
| 12196                                                                                     | 81       |            |       |      |          |           |
| 12197                                                                                     | 81       |            |       |      |          |           |
| 12198                                                                                     | 81       |            |       |      |          |           |
| 12199                                                                                     | 81       |            |       |      |          |           |
| 12200                                                                                     | 81       |            |       |      |          |           |
| 12201                                                                                     | 81       |            |       |      |          |           |
| 12202                                                                                     | 81       |            |       |      |          |           |
| 12203                                                                                     | 81       |            |       |      |          |           |
| 12204                                                                                     | 81       |            |       |      |          |           |
| 12205                                                                                     | 81       |            |       |      |          |           |
|  12206 | 81       |            |       |      |          |           |

| Ereignis | Aufnahme | DAPI/CK-PE | CK-PE | DAPI | CD45-APC | HER-2/neu |
|----------|----------|------------|-------|------|----------|-----------|
| 12207    | 81       |            |       |      |          |           |
| 12208    | 81       |            |       |      |          |           |
| 12209    | 81       |            |       |      |          |           |
| 12210    | 81       |            |       |      |          |           |
| 12211    | 81       |            |       |      |          |           |
| 12212    | 81       |            |       |      |          |           |
| 12213    | 81       |            |       |      |          |           |
| 12214    | 81       |            |       |      |          |           |
| 12215    | 81       |            |       |      |          |           |
| 12216    | 81       |            |       |      |          |           |
| 12217    | 81       |            |       |      |          |           |



| Ereignis                                                                                  | Aufnahme | DAPI/CK-PE | CK-PE | DAPI | CD45-APC | HER-2/neu |
|-------------------------------------------------------------------------------------------|----------|------------|-------|------|----------|-----------|
| 12218                                                                                     | 81       |            |       |      |          |           |
| 12219                                                                                     | 81       |            |       |      |          |           |
| 12220                                                                                     | 81       |            |       |      |          |           |
| 12221                                                                                     | 81       |            |       |      |          |           |
| 12222                                                                                     | 81       |            |       |      |          |           |
| 12223                                                                                     | 81       |            |       |      |          |           |
| 12224                                                                                     | 81       |            |       |      |          |           |
| 12225                                                                                     | 81       |            |       |      |          |           |
|  12226 | 81       |            |       |      |          |           |
| 12227                                                                                     | 81       |            |       |      |          |           |
| 12228                                                                                     | 81       |            |       |      |          |           |
| 12229                                                                                     | 81       |            |       |      |          |           |

| Ereignis                                                                                     | Aufnahme | DAPI/CK-PE                                                                          | CK-PE                                                                               | DAPI                                                                                 | CD45-APC                                                                              | HER-2/neu                                                                             |
|----------------------------------------------------------------------------------------------|----------|-------------------------------------------------------------------------------------|-------------------------------------------------------------------------------------|--------------------------------------------------------------------------------------|---------------------------------------------------------------------------------------|---------------------------------------------------------------------------------------|
| 12230<br>   | 81       |    |    |    |    |    |
| 12231                                                                                        | 81       |    |    |    |    |    |
| 12232                                                                                        | 81       |    |    |    |    |    |
| 12233                                                                                        | 81       |    |    |    |    |    |
| 12234                                                                                        | 81       |    |    |    |    |    |
| 12235<br> | 80       |   |   |   |   |   |
| 12236<br> | 60       |  |  |  |  |  |
| 12237<br> | 80       |  |  |  |  |  |
| 12238                                                                                        | 81       |  |  |  |  |  |
| 12239                                                                                        | 81       |  |  |  |  |  |

| Ereignis                                                                                     | Aufnahme | DAPI/CK-PE                                                                          | CK-PE                                                                               | DAPI                                                                                 | CD45-APC                                                                              | HER-2/neu                                                                             |
|----------------------------------------------------------------------------------------------|----------|-------------------------------------------------------------------------------------|-------------------------------------------------------------------------------------|--------------------------------------------------------------------------------------|---------------------------------------------------------------------------------------|---------------------------------------------------------------------------------------|
| 12240<br>   | 80       |    |    |    |    |    |
| 12241                                                                                        | 81       |    |    |    |    |    |
| 12242                                                                                        | 81       |    |    |    |    |    |
| 12243                                                                                        | 80       |    |    |    |    |    |
| 12244                                                                                        | 60       |   |   |   |   |   |
| 12245                                                                                        | 81       |  |  |  |  |  |
| 12246                                                                                        | 60       |  |  |  |  |  |
| 12247                                                                                        | 60       |  |  |  |  |  |
| 12248                                                                                        | 60       |  |  |  |  |  |
| 12249<br> | 60       |  |  |  |  |  |

| Ereignis | Aufnahme | DAPI/CK-PE | CK-PE | DAPI | CD45-APC | HER-2/neu |
|----------|----------|------------|-------|------|----------|-----------|
| 12250    | 82       |            |       |      |          |           |
| 12251    | 82       |            |       |      |          |           |
| 12252    | 82       |            |       |      |          |           |
| 12253    | 82       |            |       |      |          |           |
| 12254    | 82       |            |       |      |          |           |
| 12255    | 82       |            |       |      |          |           |
| 12256    | 82       |            |       |      |          |           |
| 12257    | 82       |            |       |      |          |           |
| 12258    | 82       |            |       |      |          |           |
| 12259    | 82       |            |       |      |          |           |
| 12260    | 82       |            |       |      |          |           |
| 12261    | 82       |            |       |      |          |           |
| 12262    | 82       |            |       |      |          |           |



| Ereignis | Aufnahme | DAPI/CK-PE                                                                          | CK-PE                                                                               | DAPI                                                                                 | CD45-APC                                                                              | HER-2/neu                                                                             |
|----------|----------|-------------------------------------------------------------------------------------|-------------------------------------------------------------------------------------|--------------------------------------------------------------------------------------|---------------------------------------------------------------------------------------|---------------------------------------------------------------------------------------|
| 12263    | 82       | 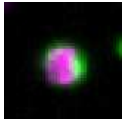   |    |    |    |    |
| 12264    | 82       |    |    |    |    |    |
| 12265    | 82       |    |    |    |    |    |
| 12266    | 82       |    |    |    |    |    |
| 12267    | 82       |    |    |    |    |    |
| 12268    | 82       |   |   |   |   |   |
| 12269    | 82       |  |  |  |  |  |
| 12270    | 82       |  |  |  |  |  |
| 12271    | 82       |  |  |  |  |  |
| 12272    | 82       |  |  |  |  |  |
| 12273    | 82       |  |  |  |  |  |
| 12274    | 82       |  |  |  |  |  |
| 12275    | 82       |  |  |  |  |  |

| Ereignis | Aufnahme | DAPI/CK-PE | CK-PE | DAPI | CD45-APC | HER-2/neu |
|----------|----------|------------|-------|------|----------|-----------|
| 12276    | 82       |            |       |      |          |           |
| 12277    | 82       |            |       |      |          |           |
| 12278    | 82       |            |       |      |          |           |
| 12279    | 82       |            |       |      |          |           |
| 12280    | 82       |            |       |      |          |           |
| 12281    | 82       |            |       |      |          |           |
| 12282    | 82       |            |       |      |          |           |
| 12283    | 82       |            |       |      |          |           |
| 12284    | 82       |            |       |      |          |           |
| 12285    | 82       |            |       |      |          |           |
| 12286    | 82       |            |       |      |          |           |
| 12287    | 82       |            |       |      |          |           |



| Ereignis | Aufnahme | DAPI/CK-PE | CK-PE | DAPI | CD45-APC | HER-2/neu |
|----------|----------|------------|-------|------|----------|-----------|
| 12288    | 82       |            |       |      |          |           |
| 12289    | 82       |            |       |      |          |           |
| 12290    | 82       |            |       |      |          |           |
| 12291    | 82       |            |       |      |          |           |
| 12292    | 82       |            |       |      |          |           |
| 12293    | 82       |            |       |      |          |           |
| 12294    | 82       |            |       |      |          |           |
| 12295    | 82       |            |       |      |          |           |
| 12296    | 82       |            |       |      |          |           |
| 12297    | 82       |            |       |      |          |           |
| 12298    | 82       |            |       |      |          |           |
| 12299    | 82       |            |       |      |          |           |

| Ereignis | Aufnahme | DAPI/CK-PE | CK-PE | DAPI | CD45-APC | HER-2/neu |
|----------|----------|------------|-------|------|----------|-----------|
| 12300    | 82       |            |       |      |          |           |
| 12301    | 82       |            |       |      |          |           |
| 12302    | 82       |            |       |      |          |           |
| 12303    | 82       |            |       |      |          |           |
| 12304    | 82       |            |       |      |          |           |
| 12305    | 82       |            |       |      |          |           |
| 12306    | 82       |            |       |      |          |           |
| 12307    | 82       |            |       |      |          |           |
| 12308    | 82       |            |       |      |          |           |
| 12309    | 82       |            |       |      |          |           |
| 12310    | 82       |            |       |      |          |           |



| Ereignis | Aufnahme | DAPI/CK-PE | CK-PE | DAPI | CD45-APC | HER-2/neu |
|----------|----------|------------|-------|------|----------|-----------|
| 12311    | 82       |            |       |      |          |           |
| 12312    | 82       |            |       |      |          |           |
| 12313    | 82       |            |       |      |          |           |
| 12314    | 82       |            |       |      |          |           |
| 12315    | 82       |            |       |      |          |           |
| 12316    | 82       |            |       |      |          |           |
| 12317    | 82       |            |       |      |          |           |
| 12318    | 82       |            |       |      |          |           |
| 12319    | 82       |            |       |      |          |           |
| 12320    | 82       |            |       |      |          |           |
| 12321    | 82       |            |       |      |          |           |
| 12322    | 82       |            |       |      |          |           |

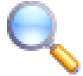

| Ereignis | Aufnahme | DAPI/CK-PE | CK-PE | DAPI | CD45-APC | HER-2/neu |
|----------|----------|------------|-------|------|----------|-----------|
| 12323    | 82       |            |       |      |          |           |
| 12324    | 82       |            |       |      |          |           |
| 12325    | 82       |            |       |      |          |           |
| 12326    | 82       |            |       |      |          |           |
| 12327    | 82       |            |       |      |          |           |
| 12328    | 82       |            |       |      |          |           |
| 12329    | 82       |            |       |      |          |           |
| 12330    | 82       |            |       |      |          |           |
| 12331    | 82       |            |       |      |          |           |
| 12332    | 82       |            |       |      |          |           |
| 12333    | 82       |            |       |      |          |           |
| 12334    | 82       |            |       |      |          |           |
| 12335    | 82       |            |       |      |          |           |

| Ereignis | Aufnahme | DAPI/CK-PE | CK-PE | DAPI | CD45-APC | HER-2/neu |
|----------|----------|------------|-------|------|----------|-----------|
| 12336    | 82       |            |       |      |          |           |
| 12337    | 82       |            |       |      |          |           |
| 12338    | 82       |            |       |      |          |           |
| 12339    | 82       |            |       |      |          |           |
| 12340    | 82       |            |       |      |          |           |
| 12341    | 82       |            |       |      |          |           |
| 12342    | 82       |            |       |      |          |           |
| 12343    | 82       |            |       |      |          |           |
| 12344    | 82       |            |       |      |          |           |
| 12345    | 82       |            |       |      |          |           |
| 12346    | 82       |            |       |      |          |           |

| Ereignis                                                                                  | Aufnahme | DAPI/CK-PE | CK-PE | DAPI | CD45-APC | HER-2/neu |
|-------------------------------------------------------------------------------------------|----------|------------|-------|------|----------|-----------|
| 12347                                                                                     | 82       |            |       |      |          |           |
| 12348                                                                                     | 82       |            |       |      |          |           |
| 12349                                                                                     | 82       |            |       |      |          |           |
| 12350                                                                                     | 82       |            |       |      |          |           |
| 12351                                                                                     | 82       |            |       |      |          |           |
| 12352                                                                                     | 82       |            |       |      |          |           |
| 12353                                                                                     | 82       |            |       |      |          |           |
| 12354                                                                                     | 82       |            |       |      |          |           |
| 12355                                                                                     | 82       |            |       |      |          |           |
| 12356                                                                                     | 82       |            |       |      |          |           |
| 12357                                                                                     | 82       |            |       |      |          |           |
|  12358 | 82       |            |       |      |          |           |
| 12359                                                                                     | 82       |            |       |      |          |           |



| Ereignis | Aufnahme | DAPI/CK-PE | CK-PE | DAPI | CD45-APC | HER-2/neu |
|----------|----------|------------|-------|------|----------|-----------|
| 12360    | 82       |            |       |      |          |           |
| 12361    | 82       |            |       |      |          |           |
| 12362    | 82       |            |       |      |          |           |
| 12363    | 82       |            |       |      |          |           |
| 12364    | 82       |            |       |      |          |           |
| 12365    | 82       |            |       |      |          |           |
| 12366    | 82       |            |       |      |          |           |
| 12367    | 82       |            |       |      |          |           |
| 12368    | 82       |            |       |      |          |           |
| 12369    | 82       |            |       |      |          |           |
| 12370    | 82       |            |       |      |          |           |
| 12371    | 82       |            |       |      |          |           |

| Ereignis | Aufnahme | DAPI/CK-PE | CK-PE | DAPI | CD45-APC | HER-2/neu |
|----------|----------|------------|-------|------|----------|-----------|
| 12372    | 82       |            |       |      |          |           |
| 12373    | 82       |            |       |      |          |           |
| 12374    | 82       |            |       |      |          |           |
| 12375    | 82       |            |       |      |          |           |
| 12376    | 82       |            |       |      |          |           |
| 12377    | 82       |            |       |      |          |           |
| 12378    | 82       |            |       |      |          |           |
| 12379    | 82       |            |       |      |          |           |
| 12380    | 82       |            |       |      |          |           |
| 12381    | 82       |            |       |      |          |           |
| 12382    | 82       |            |       |      |          |           |

| Ereignis | Aufnahme | DAPI/CK-PE | CK-PE | DAPI | CD45-APC | HER-2/neu |
|----------|----------|------------|-------|------|----------|-----------|
| 12383    | 82       |            |       |      |          |           |
| 12384    | 82       |            |       |      |          |           |
| 12385    | 82       |            |       |      |          |           |
| 12386    | 82       |            |       |      |          |           |
| 12387    | 82       |            |       |      |          |           |
| 12388    | 82       |            |       |      |          |           |
| 12389    | 82       |            |       |      |          |           |
| 12390    | 82       |            |       |      |          |           |
| 12391    | 82       |            |       |      |          |           |
| 12392    | 82       |            |       |      |          |           |
| 12393    | 82       |            |       |      |          |           |
| 12394    | 82       |            |       |      |          |           |

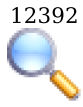

| Ereignis | Aufnahme | DAPI/CK-PE | CK-PE | DAPI | CD45-APC | HER-2/neu |
|----------|----------|------------|-------|------|----------|-----------|
| 12395    | 82       |            |       |      |          |           |
| 12396    | 82       |            |       |      |          |           |
| 12397    | 82       |            |       |      |          |           |
| 12398    | 82       |            |       |      |          |           |
| 12399    | 82       |            |       |      |          |           |
| 12400    | 82       |            |       |      |          |           |
| 12401    | 82       |            |       |      |          |           |
| 12402    | 82       |            |       |      |          |           |
| 12403    | 82       |            |       |      |          |           |
| 12404    | 82       |            |       |      |          |           |
| 12405    | 82       |            |       |      |          |           |
| 12406    | 82       |            |       |      |          |           |



| Ereignis | Aufnahme | DAPI/CK-PE                                                                          | CK-PE                                                                               | DAPI                                                                                 | CD45-APC                                                                              | HER-2/neu                                                                             |
|----------|----------|-------------------------------------------------------------------------------------|-------------------------------------------------------------------------------------|--------------------------------------------------------------------------------------|---------------------------------------------------------------------------------------|---------------------------------------------------------------------------------------|
| 12407    | 82       | 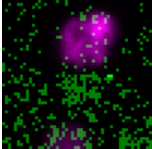   |    |    |    |    |
| 12408    | 82       |    |    |    |    |    |
| 12409    | 82       |    |    |    |    |    |
| 12410    | 82       |    |    |    |    |    |
| 12411    | 82       |    |    |    |    |    |
| 12412    | 82       |    |    |    |    |    |
| 12413    | 82       |   |   |   |   |   |
| 12414    | 82       |  |  |  |  |  |
| 12415    | 82       |  |  |  |  |  |
| 12416    | 82       |  |  |  |  |  |
| 12417    | 82       |  |  |  |  |  |
| 12418    | 82       |  |  |  |  |  |
| 12419    | 82       |  |  |  |  |  |

| Ereignis | Aufnahme | DAPI/CK-PE | CK-PE | DAPI | CD45-APC | HER-2/neu |
|----------|----------|------------|-------|------|----------|-----------|
| 12420    | 82       |            |       |      |          |           |
| 12421    | 82       |            |       |      |          |           |
| 12422    | 82       |            |       |      |          |           |
| 12423    | 82       |            |       |      |          |           |
| 12424    | 82       |            |       |      |          |           |
| 12425    | 82       |            |       |      |          |           |
| 12426    | 82       |            |       |      |          |           |
| 12427    | 82       |            |       |      |          |           |
| 12428    | 82       |            |       |      |          |           |
| 12429    | 82       |            |       |      |          |           |
| 12430    | 82       |            |       |      |          |           |
| 12431    | 82       |            |       |      |          |           |
| 12432    | 82       |            |       |      |          |           |

| Ereignis | Aufnahme | DAPI/CK-PE | CK-PE | DAPI | CD45-APC | HER-2/neu |
|----------|----------|------------|-------|------|----------|-----------|
| 12433    | 82       |            |       |      |          |           |
| 12434    | 82       |            |       |      |          |           |
| 12435    | 82       |            |       |      |          |           |
| 12436    | 82       |            |       |      |          |           |
| 12437    | 82       |            |       |      |          |           |
| 12438    | 82       |            |       |      |          |           |
| 12439    | 82       |            |       |      |          |           |
| 12440    | 82       |            |       |      |          |           |
| 12441    | 82       |            |       |      |          |           |
| 12442    | 82       |            |       |      |          |           |
| 12443    | 82       |            |       |      |          |           |
| 12444    | 82       |            |       |      |          |           |

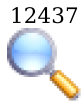

| Ereignis | Aufnahme | DAPI/CK-PE | CK-PE | DAPI | CD45-APC | HER-2/neu |
|----------|----------|------------|-------|------|----------|-----------|
| 12445    | 82       |            |       |      |          |           |
| 12446    | 82       |            |       |      |          |           |
| 12447    | 82       |            |       |      |          |           |
| 12448    | 82       |            |       |      |          |           |
| 12449    | 81       |            |       |      |          |           |
| 12450    | 82       |            |       |      |          |           |
| 12451    | 82       |            |       |      |          |           |
| 12452    | 81       |            |       |      |          |           |
| 12453    | 81       |            |       |      |          |           |



| Ereignis                                                                                     | Aufnahme | DAPI/CK-PE                                                                          | CK-PE                                                                               | DAPI                                                                                 | CD45-APC                                                                              | HER-2/neu                                                                             |
|----------------------------------------------------------------------------------------------|----------|-------------------------------------------------------------------------------------|-------------------------------------------------------------------------------------|--------------------------------------------------------------------------------------|---------------------------------------------------------------------------------------|---------------------------------------------------------------------------------------|
| 12454<br>   | 82       |    |    |    |    |    |
| 12455<br>   | 82       |    |    |    |    |    |
| 12456<br>   | 59       |    |    |    |    |    |
| 12457                                                                                        | 82       |    |    |    |    |    |
| 12458                                                                                        | 81       |   |   |   |   |   |
| 12459<br> | 83       |  |  |  |  |  |
| 12460                                                                                        | 83       |  |  |  |  |  |
| 12461                                                                                        | 83       |  |  |  |  |  |
| 12462<br> | 83       |  |  |  |  |  |

| Ereignis | Aufnahme | DAPI/CK-PE | CK-PE | DAPI | CD45-APC | HER-2/neu |
|----------|----------|------------|-------|------|----------|-----------|
| 12463    | 83       |            |       |      |          |           |
| 12464    | 83       |            |       |      |          |           |
| 12465    | 83       |            |       |      |          |           |
| 12466    | 83       |            |       |      |          |           |
| 12467    | 83       |            |       |      |          |           |
| 12468    | 83       |            |       |      |          |           |
| 12469    | 83       |            |       |      |          |           |
| 12470    | 83       |            |       |      |          |           |
| 12471    | 83       |            |       |      |          |           |
| 12472    | 83       |            |       |      |          |           |
| 12473    | 83       |            |       |      |          |           |
| 12474    | 83       |            |       |      |          |           |

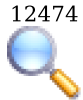

| Ereignis | Aufnahme | DAPI/CK-PE | CK-PE | DAPI | CD45-APC | HER-2/neu |
|----------|----------|------------|-------|------|----------|-----------|
| 12475    | 83       |            |       |      |          |           |
| 12476    | 83       |            |       |      |          |           |
| 12477    | 83       |            |       |      |          |           |
| 12478    | 83       |            |       |      |          |           |
| 12479    | 83       |            |       |      |          |           |
| 12480    | 83       |            |       |      |          |           |
| 12481    | 83       |            |       |      |          |           |
| 12482    | 83       |            |       |      |          |           |
| 12483    | 83       |            |       |      |          |           |
| 12484    | 83       |            |       |      |          |           |
| 12485    | 83       |            |       |      |          |           |

| Ereignis | Aufnahme | DAPI/CK-PE | CK-PE | DAPI | CD45-APC | HER-2/neu |
|----------|----------|------------|-------|------|----------|-----------|
| 12486    | 83       |            |       |      |          |           |
| 12487    | 83       |            |       |      |          |           |
| 12488    | 83       |            |       |      |          |           |
| 12489    | 83       |            |       |      |          |           |
| 12490    | 83       |            |       |      |          |           |
| 12491    | 83       |            |       |      |          |           |
| 12492    | 83       |            |       |      |          |           |
| 12493    | 83       |            |       |      |          |           |
| 12494    | 83       |            |       |      |          |           |
| 12495    | 83       |            |       |      |          |           |
| 12496    | 83       |            |       |      |          |           |
| 12497    | 83       |            |       |      |          |           |
| 12498    | 83       |            |       |      |          |           |



| Ereignis | Aufnahme | DAPI/CK-PE | CK-PE | DAPI | CD45-APC | HER-2/neu |
|----------|----------|------------|-------|------|----------|-----------|
| 12499    | 83       |            |       |      |          |           |
| 12500    | 83       |            |       |      |          |           |
| 12501    | 83       |            |       |      |          |           |
| 12502    | 83       |            |       |      |          |           |
| 12503    | 83       |            |       |      |          |           |
| 12504    | 83       |            |       |      |          |           |
| 12505    | 83       |            |       |      |          |           |
| 12506    | 83       |            |       |      |          |           |
| 12507    | 83       |            |       |      |          |           |
| 12508    | 83       |            |       |      |          |           |
| 12509    | 83       |            |       |      |          |           |
| 12510    | 83       |            |       |      |          |           |
| 12511    | 83       |            |       |      |          |           |

| Ereignis                                                                                  | Aufnahme | DAPI/CK-PE                                                                          | CK-PE                                                                               | DAPI                                                                                 | CD45-APC                                                                              | HER-2/neu                                                                             |
|-------------------------------------------------------------------------------------------|----------|-------------------------------------------------------------------------------------|-------------------------------------------------------------------------------------|--------------------------------------------------------------------------------------|---------------------------------------------------------------------------------------|---------------------------------------------------------------------------------------|
| 12512    | 83       |    |    |    |    |    |
| 12513    | 83       |    |    |    |    |    |
| 12514                                                                                     | 83       |    |    |    |    |    |
| 12515                                                                                     | 83       |    |    |    |    |    |
| 12516                                                                                     | 83       |    |    |    |    |    |
| 12517  | 83       |  |  |  |  |  |
| 12518                                                                                     | 83       |  |  |  |  |  |
| 12519                                                                                     | 83       |  |  |  |  |  |
| 12520                                                                                     | 83       |  |  |  |  |  |
| 12521                                                                                     | 83       |  |  |  |  |  |
| 12522                                                                                     | 83       |  |  |  |  |  |

| Ereignis | Aufnahme | DAPI/CK-PE | CK-PE | DAPI | CD45-APC | HER-2/neu |
|----------|----------|------------|-------|------|----------|-----------|
| 12523    | 83       |            |       |      |          |           |
| 12524    | 83       |            |       |      |          |           |
| 12525    | 83       |            |       |      |          |           |
| 12526    | 83       |            |       |      |          |           |
| 12527    | 83       |            |       |      |          |           |
| 12528    | 83       |            |       |      |          |           |
| 12529    | 83       |            |       |      |          |           |
| 12530    | 83       |            |       |      |          |           |
| 12531    | 83       |            |       |      |          |           |
| 12532    | 83       |            |       |      |          |           |
| 12533    | 83       |            |       |      |          |           |

| Ereignis | Aufnahme | DAPI/CK-PE | CK-PE | DAPI | CD45-APC | HER-2/neu |
|----------|----------|------------|-------|------|----------|-----------|
| 12534    | 83       |            |       |      |          |           |
| 12535    | 83       |            |       |      |          |           |
| 12536    | 83       |            |       |      |          |           |
| 12537    | 83       |            |       |      |          |           |
| 12538    | 83       |            |       |      |          |           |
| 12539    | 83       |            |       |      |          |           |
| 12540    | 83       |            |       |      |          |           |
| 12541    | 83       |            |       |      |          |           |
| 12542    | 83       |            |       |      |          |           |
| 12543    | 83       |            |       |      |          |           |
| 12544    | 83       |            |       |      |          |           |
| 12545    | 83       |            |       |      |          |           |

12534

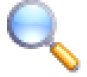



| Ereignis | Aufnahme | DAPI/CK-PE | CK-PE | DAPI | CD45-APC | HER-2/neu |
|----------|----------|------------|-------|------|----------|-----------|
| 12546    | 83       |            |       |      |          |           |
| 12547    | 83       |            |       |      |          |           |
| 12548    | 83       |            |       |      |          |           |
| 12549    | 83       |            |       |      |          |           |
| 12550    | 83       |            |       |      |          |           |
| 12551    | 83       |            |       |      |          |           |
| 12552    | 83       |            |       |      |          |           |
| 12553    | 83       |            |       |      |          |           |
| 12554    | 83       |            |       |      |          |           |
| 12555    | 83       |            |       |      |          |           |
| 12556    | 83       |            |       |      |          |           |

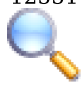

| Ereignis | Aufnahme | DAPI/CK-PE                                                                          | CK-PE                                                                               | DAPI                                                                                 | CD45-APC                                                                              | HER-2/neu                                                                             |
|----------|----------|-------------------------------------------------------------------------------------|-------------------------------------------------------------------------------------|--------------------------------------------------------------------------------------|---------------------------------------------------------------------------------------|---------------------------------------------------------------------------------------|
| 12557    | 83       | 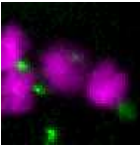   |    |    |    |    |
| 12558    | 83       |    |    |    |    |    |
| 12559    | 83       |    |    |    |    |    |
| 12560    | 83       |    |    |    |    |    |
| 12561    | 83       |    |    |    |    |    |
| 12562    | 83       |   |   |   |   |   |
| 12563    | 83       |  |  |  |  |  |
| 12564    | 83       |  |  |  |  |  |
| 12565    | 83       |  |  |  |  |  |
| 12566    | 83       |  |  |  |  |  |
| 12567    | 83       |  |  |  |  |  |

| Ereignis | Aufnahme | DAPI/CK-PE | CK-PE | DAPI | CD45-APC | HER-2/neu |
|----------|----------|------------|-------|------|----------|-----------|
| 12568    | 83       |            |       |      |          |           |
| 12569    | 83       |            |       |      |          |           |
| 12570    | 83       |            |       |      |          |           |
| 12571    | 83       |            |       |      |          |           |
| 12572    | 83       |            |       |      |          |           |
| 12573    | 83       |            |       |      |          |           |
| 12574    | 83       |            |       |      |          |           |
| 12575    | 83       |            |       |      |          |           |
| 12576    | 83       |            |       |      |          |           |
| 12577    | 83       |            |       |      |          |           |
| 12578    | 83       |            |       |      |          |           |

| Ereignis | Aufnahme | DAPI/CK-PE | CK-PE | DAPI | CD45-APC | HER-2/neu |
|----------|----------|------------|-------|------|----------|-----------|
| 12579    | 83       |            |       |      |          |           |
| 12580    | 83       |            |       |      |          |           |
| 12581    | 83       |            |       |      |          |           |
| 12582    | 83       |            |       |      |          |           |
| 12583    | 83       |            |       |      |          |           |
| 12584    | 83       |            |       |      |          |           |
| 12585    | 83       |            |       |      |          |           |
| 12586    | 83       |            |       |      |          |           |
| 12587    | 83       |            |       |      |          |           |
| 12588    | 83       |            |       |      |          |           |
| 12589    | 83       |            |       |      |          |           |



| Ereignis                                                                                  | Aufnahme | DAPI/CK-PE | CK-PE | DAPI | CD45-APC | HER-2/neu |
|-------------------------------------------------------------------------------------------|----------|------------|-------|------|----------|-----------|
| 12590                                                                                     | 83       |            |       |      |          |           |
| 12591                                                                                     | 83       |            |       |      |          |           |
| 12592                                                                                     | 83       |            |       |      |          |           |
| 12593                                                                                     | 83       |            |       |      |          |           |
| 12594                                                                                     | 83       |            |       |      |          |           |
|  12595   | 83       |            |       |      |          |           |
| 12596                                                                                     | 83       |            |       |      |          |           |
|  12597 | 83       |            |       |      |          |           |
| 12598                                                                                     | 83       |            |       |      |          |           |
|  12599 | 83       |            |       |      |          |           |
| 12600                                                                                     | 83       |            |       |      |          |           |

| Ereignis                                                                                | Aufnahme | DAPI/CK-PE | CK-PE | DAPI | CD45-APC | HER-2/neu |
|-----------------------------------------------------------------------------------------|----------|------------|-------|------|----------|-----------|
| 12601                                                                                   | 83       |            |       |      |          |           |
| 12602                                                                                   | 83       |            |       |      |          |           |
| 12603                                                                                   | 83       |            |       |      |          |           |
| 12604                                                                                   | 83       |            |       |      |          |           |
|  12605 | 83       |            |       |      |          |           |
| 12606                                                                                   | 83       |            |       |      |          |           |
| 12607                                                                                   | 83       |            |       |      |          |           |
| 12608                                                                                   | 83       |            |       |      |          |           |
| 12609                                                                                   | 83       |            |       |      |          |           |
| 12610                                                                                   | 83       |            |       |      |          |           |
| 12611                                                                                   | 83       |            |       |      |          |           |
| 12612                                                                                   | 83       |            |       |      |          |           |
| 12613                                                                                   | 83       |            |       |      |          |           |

| Ereignis | Aufnahme | DAPI/CK-PE | CK-PE | DAPI | CD45-APC | HER-2/neu |
|----------|----------|------------|-------|------|----------|-----------|
| 12614    | 83       |            |       |      |          |           |
| 12615    | 83       |            |       |      |          |           |
| 12616    | 83       |            |       |      |          |           |
| 12617    | 83       |            |       |      |          |           |
| 12618    | 83       |            |       |      |          |           |
| 12619    | 83       |            |       |      |          |           |
| 12620    | 83       |            |       |      |          |           |
| 12621    | 83       |            |       |      |          |           |
| 12622    | 83       |            |       |      |          |           |
| 12623    | 83       |            |       |      |          |           |
| 12624    | 83       |            |       |      |          |           |



| Ereignis | Aufnahme | DAPI/CK-PE | CK-PE | DAPI | CD45-APC | HER-2/neu |
|----------|----------|------------|-------|------|----------|-----------|
| 12625    | 83       |            |       |      |          |           |
| 12626    | 83       |            |       |      |          |           |
| 12627    | 83       |            |       |      |          |           |
| 12628    | 83       |            |       |      |          |           |
| 12629    | 83       |            |       |      |          |           |
| 12630    | 83       |            |       |      |          |           |
| 12631    | 83       |            |       |      |          |           |
| 12632    | 83       |            |       |      |          |           |
| 12633    | 83       |            |       |      |          |           |
| 12634    | 83       |            |       |      |          |           |
| 12635    | 83       |            |       |      |          |           |
| 12636    | 83       |            |       |      |          |           |



| Ereignis | Aufnahme | DAPI/CK-PE | CK-PE | DAPI | CD45-APC | HER-2/neu |
|----------|----------|------------|-------|------|----------|-----------|
| 12637    | 83       |            |       |      |          |           |
| 12638    | 83       |            |       |      |          |           |
| 12639    | 83       |            |       |      |          |           |
| 12640    | 83       |            |       |      |          |           |
| 12641    | 83       |            |       |      |          |           |
| 12642    | 83       |            |       |      |          |           |
| 12643    | 83       |            |       |      |          |           |
| 12644    | 83       |            |       |      |          |           |
| 12645    | 83       |            |       |      |          |           |
| 12646    | 83       |            |       |      |          |           |
| 12647    | 83       |            |       |      |          |           |
| 12648    | 83       |            |       |      |          |           |

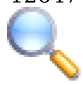

| Ereignis | Aufnahme | DAPI/CK-PE | CK-PE | DAPI | CD45-APC | HER-2/neu |
|----------|----------|------------|-------|------|----------|-----------|
| 12649    | 83       |            |       |      |          |           |
| 12650    | 83       |            |       |      |          |           |
| 12651    | 83       |            |       |      |          |           |
| 12652    | 83       |            |       |      |          |           |
| 12653    | 83       |            |       |      |          |           |
| 12654    | 83       |            |       |      |          |           |
| 12655    | 83       |            |       |      |          |           |
| 12656    | 83       |            |       |      |          |           |
| 12657    | 83       |            |       |      |          |           |
| 12658    | 83       |            |       |      |          |           |
| 12659    | 83       |            |       |      |          |           |
| 12660    | 83       |            |       |      |          |           |

| Ereignis | Aufnahme | DAPI/CK-PE                                                                          | CK-PE                                                                               | DAPI                                                                                 | CD45-APC                                                                              | HER-2/neu                                                                             |
|----------|----------|-------------------------------------------------------------------------------------|-------------------------------------------------------------------------------------|--------------------------------------------------------------------------------------|---------------------------------------------------------------------------------------|---------------------------------------------------------------------------------------|
| 12661    | 83       | 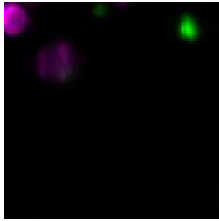   |    |    |    |    |
| 12662    | 83       |    |    |    |    |    |
| 12663    | 83       |    |    |    |    |    |
| 12664    | 83       |    |    |    |    |    |
| 12665    | 83       |    |    |    |    |    |
| 12666    | 83       |   |   |   |   |   |
| 12667    | 83       |  |  |  |  |  |
| 12668    | 83       |  |  |  |  |  |
| 12669    | 83       |  |  |  |  |  |
| 12670    | 83       |  |  |  |  |  |
| 12671    | 83       |  |  |  |  |  |

| Ereignis                                                                                     | Aufnahme | DAPI/CK-PE                                                                          | CK-PE                                                                               | DAPI                                                                                 | CD45-APC                                                                              | HER-2/neu                                                                             |
|----------------------------------------------------------------------------------------------|----------|-------------------------------------------------------------------------------------|-------------------------------------------------------------------------------------|--------------------------------------------------------------------------------------|---------------------------------------------------------------------------------------|---------------------------------------------------------------------------------------|
| 12672<br>   | 82       |    |    |    |    |    |
| 12673<br>   | 82       |    |    |    |    |    |
| 12674<br>   | 83       |    |    |    |    |    |
| 12675                                                                                        | 58       |   |   |   |   |   |
| 12676<br> | 58       |  |  |  |  |  |
| 12677                                                                                        | 58       |  |  |  |  |  |
| 12678                                                                                        | 58       |  |  |  |  |  |
| 12679<br> | 83       |  |  |  |  |  |
| 12680                                                                                        | 83       |  |  |  |  |  |



| Ereignis | Aufnahme | DAPI/CK-PE | CK-PE | DAPI | CD45-APC | HER-2/neu |
|----------|----------|------------|-------|------|----------|-----------|
| 12681    | 84       |            |       |      |          |           |
| 12682    | 84       |            |       |      |          |           |
| 12683    | 84       |            |       |      |          |           |
| 12684    | 84       |            |       |      |          |           |
| 12685    | 84       |            |       |      |          |           |
| 12686    | 84       |            |       |      |          |           |
| 12687    | 84       |            |       |      |          |           |
| 12688    | 84       |            |       |      |          |           |
| 12689    | 84       |            |       |      |          |           |
| 12690    | 84       |            |       |      |          |           |
| 12691    | 84       |            |       |      |          |           |
| 12692    | 84       |            |       |      |          |           |



| Ereignis | Aufnahme | DAPI/CK-PE | CK-PE | DAPI | CD45-APC | HER-2/neu |
|----------|----------|------------|-------|------|----------|-----------|
| 12693    | 84       |            |       |      |          |           |
| 12694    | 84       |            |       |      |          |           |
| 12695    | 84       |            |       |      |          |           |
| 12696    | 84       |            |       |      |          |           |
| 12697    | 84       |            |       |      |          |           |
| 12698    | 84       |            |       |      |          |           |
| 12699    | 84       |            |       |      |          |           |
| 12700    | 84       |            |       |      |          |           |
| 12701    | 84       |            |       |      |          |           |
| 12702    | 84       |            |       |      |          |           |
| 12703    | 84       |            |       |      |          |           |

| Ereignis | Aufnahme | DAPI/CK-PE | CK-PE | DAPI | CD45-APC | HER-2/neu |
|----------|----------|------------|-------|------|----------|-----------|
| 12704    | 84       |            |       |      |          |           |
| 12705    | 84       |            |       |      |          |           |
| 12706    | 84       |            |       |      |          |           |
| 12707    | 84       |            |       |      |          |           |
| 12708    | 84       |            |       |      |          |           |
| 12709    | 84       |            |       |      |          |           |
| 12710    | 84       |            |       |      |          |           |
| 12711    | 84       |            |       |      |          |           |
| 12712    | 84       |            |       |      |          |           |
| 12713    | 84       |            |       |      |          |           |
| 12714    | 84       |            |       |      |          |           |
| 12715    | 84       |            |       |      |          |           |

| Ereignis | Aufnahme | DAPI/CK-PE | CK-PE | DAPI | CD45-APC | HER-2/neu |
|----------|----------|------------|-------|------|----------|-----------|
| 12716    | 84       |            |       |      |          |           |
| 12717    | 84       |            |       |      |          |           |
| 12718    | 84       |            |       |      |          |           |
| 12719    | 84       |            |       |      |          |           |
| 12720    | 84       |            |       |      |          |           |
| 12721    | 84       |            |       |      |          |           |
| 12722    | 84       |            |       |      |          |           |
| 12723    | 84       |            |       |      |          |           |
| 12724    | 84       |            |       |      |          |           |
| 12725    | 84       |            |       |      |          |           |
| 12726    | 84       |            |       |      |          |           |
| 12727    | 84       |            |       |      |          |           |
| 12728    | 84       |            |       |      |          |           |



| Ereignis | Aufnahme | DAPI/CK-PE                                                                          | CK-PE                                                                               | DAPI                                                                                 | CD45-APC                                                                              | HER-2/neu                                                                             |
|----------|----------|-------------------------------------------------------------------------------------|-------------------------------------------------------------------------------------|--------------------------------------------------------------------------------------|---------------------------------------------------------------------------------------|---------------------------------------------------------------------------------------|
| 12729    | 84       | 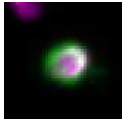   |    |    |    |    |
| 12730    | 84       |    |    |    |    |    |
| 12731    | 84       |    |    |    |    |    |
| 12732    | 84       |    |    |    |    |    |
| 12733    | 84       |    |    |    |    |    |
| 12734    | 84       |    |    |    |    |    |
| 12735    | 84       |   |   |   |   |   |
| 12736    | 84       |  |  |  |  |  |
| 12737    | 84       |  |  |  |  |  |
| 12738    | 84       |  |  |  |  |  |
| 12739    | 84       |  |  |  |  |  |
| 12740    | 84       |  |  |  |  |  |



| Ereignis | Aufnahme | DAPI/CK-PE | CK-PE | DAPI | CD45-APC | HER-2/neu |
|----------|----------|------------|-------|------|----------|-----------|
| 12741    | 84       |            |       |      |          |           |
| 12742    | 84       |            |       |      |          |           |
| 12743    | 84       |            |       |      |          |           |
| 12744    | 84       |            |       |      |          |           |
| 12745    | 84       |            |       |      |          |           |
| 12746    | 84       |            |       |      |          |           |
| 12747    | 84       |            |       |      |          |           |
| 12748    | 84       |            |       |      |          |           |
| 12749    | 84       |            |       |      |          |           |
| 12750    | 84       |            |       |      |          |           |
| 12751    | 84       |            |       |      |          |           |
| 12752    | 84       |            |       |      |          |           |
| 12753    | 84       |            |       |      |          |           |

| Ereignis | Aufnahme | DAPI/CK-PE | CK-PE | DAPI | CD45-APC | HER-2/neu |
|----------|----------|------------|-------|------|----------|-----------|
| 12754    | 84       |            |       |      |          |           |
| 12755    | 84       |            |       |      |          |           |
| 12756    | 84       |            |       |      |          |           |
| 12757    | 84       |            |       |      |          |           |
| 12758    | 84       |            |       |      |          |           |
| 12759    | 84       |            |       |      |          |           |
| 12760    | 84       |            |       |      |          |           |
| 12761    | 84       |            |       |      |          |           |
| 12762    | 84       |            |       |      |          |           |
| 12763    | 84       |            |       |      |          |           |
| 12764    | 84       |            |       |      |          |           |
| 12765    | 84       |            |       |      |          |           |

| Ereignis | Aufnahme | DAPI/CK-PE                                                                          | CK-PE                                                                               | DAPI                                                                                 | CD45-APC                                                                              | HER-2/neu                                                                             |
|----------|----------|-------------------------------------------------------------------------------------|-------------------------------------------------------------------------------------|--------------------------------------------------------------------------------------|---------------------------------------------------------------------------------------|---------------------------------------------------------------------------------------|
| 12766    | 84       | 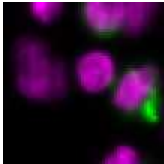   |    |    |    |    |
| 12767    | 84       |    |    |    |    |    |
| 12768    | 84       |    |    |    |    |    |
| 12769    | 84       |    |    |    |    |    |
| 12770    | 84       |    |    |    |    |    |
| 12771    | 84       |    |    |    |    |    |
| 12772    | 84       |  |  |  |  |  |
| 12773    | 84       |  |  |  |  |  |
| 12774    | 84       |  |  |  |  |  |
| 12775    | 84       |  |  |  |  |  |
| 12776    | 84       |  |  |  |  |  |
| 12777    | 84       |  |  |  |  |  |





| Ereignis                                                                                  | Aufnahme | DAPI/CK-PE | CK-PE | DAPI | CD45-APC | HER-2/neu |
|-------------------------------------------------------------------------------------------|----------|------------|-------|------|----------|-----------|
| 12778                                                                                     | 84       |            |       |      |          |           |
| 12779                                                                                     | 84       |            |       |      |          |           |
| 12780                                                                                     | 84       |            |       |      |          |           |
| 12781                                                                                     | 84       |            |       |      |          |           |
| 12782                                                                                     | 84       |            |       |      |          |           |
|  12783  | 84       |            |       |      |          |           |
| 12784                                                                                     | 84       |            |       |      |          |           |
| 12785                                                                                     | 84       |            |       |      |          |           |
| 12786                                                                                     | 84       |            |       |      |          |           |
|  12787 | 84       |            |       |      |          |           |
| 12788                                                                                     | 84       |            |       |      |          |           |

| Ereignis | Aufnahme | DAPI/CK-PE | CK-PE | DAPI | CD45-APC | HER-2/neu |
|----------|----------|------------|-------|------|----------|-----------|
| 12789    | 84       |            |       |      |          |           |
| 12790    | 84       |            |       |      |          |           |
| 12791    | 84       |            |       |      |          |           |
| 12792    | 84       |            |       |      |          |           |
| 12793    | 84       |            |       |      |          |           |
| 12794    | 84       |            |       |      |          |           |
| 12795    | 84       |            |       |      |          |           |
| 12796    | 84       |            |       |      |          |           |
| 12797    | 84       |            |       |      |          |           |
| 12798    | 84       |            |       |      |          |           |
| 12799    | 84       |            |       |      |          |           |
| 12800    | 84       |            |       |      |          |           |

| Ereignis | Aufnahme | DAPI/CK-PE                                                                          | CK-PE                                                                               | DAPI                                                                                 | CD45-APC                                                                              | HER-2/neu                                                                             |
|----------|----------|-------------------------------------------------------------------------------------|-------------------------------------------------------------------------------------|--------------------------------------------------------------------------------------|---------------------------------------------------------------------------------------|---------------------------------------------------------------------------------------|
| 12801    | 84       | 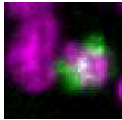   |    |    |    |    |
| 12802    | 84       |    |    |    |    |    |
| 12803    | 84       |    |    |    |    |    |
| 12804    | 84       |    |    |    |    |    |
| 12805    | 84       |    |    |    |    |    |
| 12806    | 84       |   |   |   |   |   |
| 12807    | 84       |  |  |  |  |  |
| 12808    | 84       |  |  |  |  |  |
| 12809    | 84       |  |  |  |  |  |
| 12810    | 84       |  |  |  |  |  |
| 12811    | 84       |  |  |  |  |  |

| Ereignis                                                                                  | Aufnahme | DAPI/CK-PE | CK-PE | DAPI | CD45-APC | HER-2/neu |
|-------------------------------------------------------------------------------------------|----------|------------|-------|------|----------|-----------|
| 12812                                                                                     | 84       |            |       |      |          |           |
| 12813                                                                                     | 84       |            |       |      |          |           |
| 12814                                                                                     | 84       |            |       |      |          |           |
| 12815                                                                                     | 84       |            |       |      |          |           |
| 12816                                                                                     | 84       |            |       |      |          |           |
| 12817                                                                                     | 84       |            |       |      |          |           |
| 12818                                                                                     | 84       |            |       |      |          |           |
| 12819                                                                                     | 84       |            |       |      |          |           |
| 12820                                                                                     | 84       |            |       |      |          |           |
| 12821                                                                                     | 84       |            |       |      |          |           |
| 12822                                                                                     | 84       |            |       |      |          |           |
| 12823                                                                                     | 84       |            |       |      |          |           |
|  12824 | 84       |            |       |      |          |           |



| Ereignis | Aufnahme | DAPI/CK-PE | CK-PE | DAPI | CD45-APC | HER-2/neu |
|----------|----------|------------|-------|------|----------|-----------|
| 12825    | 84       |            |       |      |          |           |
| 12826    | 84       |            |       |      |          |           |
| 12827    | 84       |            |       |      |          |           |
| 12828    | 84       |            |       |      |          |           |
| 12829    | 84       |            |       |      |          |           |
| 12830    | 84       |            |       |      |          |           |
| 12831    | 84       |            |       |      |          |           |
| 12832    | 84       |            |       |      |          |           |
| 12833    | 84       |            |       |      |          |           |
| 12834    | 84       |            |       |      |          |           |
| 12835    | 84       |            |       |      |          |           |
| 12836    | 84       |            |       |      |          |           |

| Ereignis                                                                                  | Aufnahme | DAPI/CK-PE | CK-PE | DAPI | CD45-APC | HER-2/neu |
|-------------------------------------------------------------------------------------------|----------|------------|-------|------|----------|-----------|
| 12837                                                                                     | 84       |            |       |      |          |           |
| 12838                                                                                     | 84       |            |       |      |          |           |
| 12839                                                                                     | 84       |            |       |      |          |           |
| 12840                                                                                     | 84       |            |       |      |          |           |
| 12841                                                                                     | 84       |            |       |      |          |           |
| 12842                                                                                     | 84       |            |       |      |          |           |
|  12843 | 84       |            |       |      |          |           |
| 12844                                                                                     | 84       |            |       |      |          |           |
| 12845                                                                                     | 84       |            |       |      |          |           |
| 12846                                                                                     | 84       |            |       |      |          |           |
| 12847                                                                                     | 84       |            |       |      |          |           |
| 12848                                                                                     | 84       |            |       |      |          |           |

| Ereignis                                                                                | Aufnahme | DAPI/CK-PE | CK-PE | DAPI | CD45-APC | HER-2/neu |
|-----------------------------------------------------------------------------------------|----------|------------|-------|------|----------|-----------|
| 12849                                                                                   | 84       |            |       |      |          |           |
| 12850                                                                                   | 84       |            |       |      |          |           |
| 12851                                                                                   | 84       |            |       |      |          |           |
|  12852 | 84       |            |       |      |          |           |
| 12853                                                                                   | 84       |            |       |      |          |           |
| 12854                                                                                   | 84       |            |       |      |          |           |
| 12855                                                                                   | 84       |            |       |      |          |           |
| 12856                                                                                   | 84       |            |       |      |          |           |
| 12857                                                                                   | 84       |            |       |      |          |           |
| 12858                                                                                   | 84       |            |       |      |          |           |
| 12859                                                                                   | 84       |            |       |      |          |           |
| 12860                                                                                   | 84       |            |       |      |          |           |
| 12861                                                                                   | 84       |            |       |      |          |           |

| Ereignis | Aufnahme | DAPI/CK-PE | CK-PE | DAPI | CD45-APC | HER-2/neu |
|----------|----------|------------|-------|------|----------|-----------|
| 12862    | 84       |            |       |      |          |           |
| 12863    | 84       |            |       |      |          |           |
| 12864    | 84       |            |       |      |          |           |
| 12865    | 84       |            |       |      |          |           |
| 12866    | 84       |            |       |      |          |           |
| 12867    | 84       |            |       |      |          |           |
| 12868    | 84       |            |       |      |          |           |
| 12869    | 84       |            |       |      |          |           |
| 12870    | 84       |            |       |      |          |           |
| 12871    | 84       |            |       |      |          |           |
| 12872    | 84       |            |       |      |          |           |
| 12873    | 84       |            |       |      |          |           |
| 12874    | 84       |            |       |      |          |           |



| Ereignis | Aufnahme | DAPI/CK-PE | CK-PE | DAPI | CD45-APC | HER-2/neu |
|----------|----------|------------|-------|------|----------|-----------|
| 12875    | 84       |            |       |      |          |           |
| 12876    | 84       |            |       |      |          |           |
| 12877    | 84       |            |       |      |          |           |
| 12878    | 84       |            |       |      |          |           |
| 12879    | 84       |            |       |      |          |           |
| 12880    | 84       |            |       |      |          |           |
| 12881    | 84       |            |       |      |          |           |
| 12882    | 84       |            |       |      |          |           |
| 12883    | 84       |            |       |      |          |           |
| 12884    | 84       |            |       |      |          |           |
| 12885    | 84       |            |       |      |          |           |

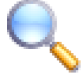

| Ereignis | Aufnahme | DAPI/CK-PE                                                                          | CK-PE                                                                               | DAPI                                                                                 | CD45-APC                                                                              | HER-2/neu                                                                             |
|----------|----------|-------------------------------------------------------------------------------------|-------------------------------------------------------------------------------------|--------------------------------------------------------------------------------------|---------------------------------------------------------------------------------------|---------------------------------------------------------------------------------------|
| 12886    | 84       | 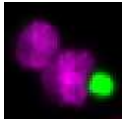   |    |    |    |    |
| 12887    | 84       |    |    |    |    |    |
| 12888    | 84       |    |    |    |    |    |
| 12889    | 84       |    |    |    |    |    |
| 12890    | 84       |    |    |    |    |    |
| 12891    | 84       |    |    |    |    |    |
| 12892    | 84       |   |   |   |   |   |
| 12893    | 84       |  |  |  |  |  |
| 12894    | 84       |  |  |  |  |  |
| 12895    | 84       |  |  |  |  |  |
| 12896    | 84       |  |  |  |  |  |
| 12897    | 84       |  |  |  |  |  |
| 12898    | 84       |  |  |  |  |  |

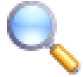

| Ereignis | Aufnahme | DAPI/CK-PE | CK-PE | DAPI | CD45-APC | HER-2/neu |
|----------|----------|------------|-------|------|----------|-----------|
| 12899    | 84       |            |       |      |          |           |
| 12900    | 84       |            |       |      |          |           |
| 12901    | 84       |            |       |      |          |           |
| 12902    | 84       |            |       |      |          |           |
| 12903    | 84       |            |       |      |          |           |
| 12904    | 84       |            |       |      |          |           |
| 12905    | 84       |            |       |      |          |           |
| 12906    | 84       |            |       |      |          |           |
| 12907    | 84       |            |       |      |          |           |
| 12908    | 84       |            |       |      |          |           |
| 12909    | 84       |            |       |      |          |           |
| 12910    | 84       |            |       |      |          |           |
| 12911    | 84       |            |       |      |          |           |

| Ereignis | Aufnahme | DAPI/CK-PE                                                                          | CK-PE                                                                               | DAPI                                                                                 | CD45-APC                                                                              | HER-2/neu                                                                             |
|----------|----------|-------------------------------------------------------------------------------------|-------------------------------------------------------------------------------------|--------------------------------------------------------------------------------------|---------------------------------------------------------------------------------------|---------------------------------------------------------------------------------------|
| 12912    | 84       | 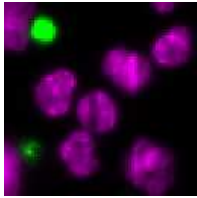   |    |    |    |    |
| 12913    | 84       |    |    |    |    |    |
| 12914    | 84       |    |    |    |    |    |
| 12915    | 84       |    |    |    |    |    |
| 12916    | 84       |    |    |    |    |    |
| 12917    | 84       |   |   |   |   |   |
| 12918    | 84       |  |  |  |  |  |
| 12919    | 84       |  |  |  |  |  |
| 12920    | 84       |  |  |  |  |  |
| 12921    | 84       |  |  |  |  |  |
| 12922    | 84       |  |  |  |  |  |
| 12923    | 84       |  |  |  |  |  |



| Ereignis | Aufnahme | DAPI/CK-PE                                                                          | CK-PE                                                                               | DAPI                                                                                 | CD45-APC                                                                              | HER-2/neu                                                                             |
|----------|----------|-------------------------------------------------------------------------------------|-------------------------------------------------------------------------------------|--------------------------------------------------------------------------------------|---------------------------------------------------------------------------------------|---------------------------------------------------------------------------------------|
| 12924    | 84       | 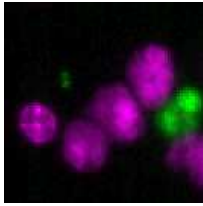   |    |    |    |    |
| 12925    | 84       |    |    |    |    |    |
| 12926    | 84       |    |    |    |    |    |
| 12927    | 84       |    |    |    |    |    |
| 12928    | 84       |   |   |   |   |   |
| 12929    | 84       |  |  |  |  |  |
| 12930    | 84       |  |  |  |  |  |
| 12931    | 84       |  |  |  |  |  |
| 12932    | 84       |  |  |  |  |  |
| 12933    | 84       |  |  |  |  |  |
| 12934    | 84       |  |  |  |  |  |
| 12935    | 84       |  |  |  |  |  |

| Ereignis | Aufnahme | DAPI/CK-PE | CK-PE | DAPI | CD45-APC | HER-2/neu |
|----------|----------|------------|-------|------|----------|-----------|
| 12936    | 84       |            |       |      |          |           |
| 12937    | 84       |            |       |      |          |           |
| 12938    | 84       |            |       |      |          |           |
| 12939    | 84       |            |       |      |          |           |
| 12940    | 84       |            |       |      |          |           |
| 12941    | 84       |            |       |      |          |           |
| 12942    | 84       |            |       |      |          |           |
| 12943    | 84       |            |       |      |          |           |
| 12944    | 84       |            |       |      |          |           |
| 12945    | 84       |            |       |      |          |           |
| 12946    | 84       |            |       |      |          |           |
| 12947    | 84       |            |       |      |          |           |
| 12948    | 84       |            |       |      |          |           |

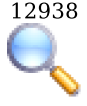

| Ereignis | Aufnahme | DAPI/CK-PE                                                                          | CK-PE                                                                               | DAPI                                                                                 | CD45-APC                                                                              | HER-2/neu                                                                             |
|----------|----------|-------------------------------------------------------------------------------------|-------------------------------------------------------------------------------------|--------------------------------------------------------------------------------------|---------------------------------------------------------------------------------------|---------------------------------------------------------------------------------------|
| 12949    | 84       | 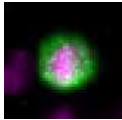   |    |    |    |    |
| 12950    | 84       |    |    |    |    |    |
| 12951    | 84       |    |    |    |    |    |
| 12952    | 84       |    |    |    |    |    |
| 12953    | 84       |    |    |    |    |    |
| 12954    | 84       |    |    |    |    |    |
| 12955    | 84       |  |  |  |  |  |
| 12956    | 84       |  |  |  |  |  |
| 12957    | 84       |  |  |  |  |  |
| 12958    | 84       |  |  |  |  |  |
| 12959    | 84       |  |  |  |  |  |
| 12960    | 84       |  |  |  |  |  |

| Ereignis | Aufnahme | DAPI/CK-PE                                                                          | CK-PE                                                                               | DAPI                                                                                 | CD45-APC                                                                              | HER-2/neu                                                                             |
|----------|----------|-------------------------------------------------------------------------------------|-------------------------------------------------------------------------------------|--------------------------------------------------------------------------------------|---------------------------------------------------------------------------------------|---------------------------------------------------------------------------------------|
| 12961    | 84       | 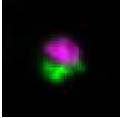   |    |    |    |    |
| 12962    | 84       |    |    |    |    |    |
| 12963    | 84       |    |    |    |    |    |
| 12964    | 84       |    |    |    |    |    |
| 12965    | 84       |    |    |    |    |    |
| 12966    | 84       |    |    |    |    |    |
| 12967    | 84       |   |   |   |   |   |
| 12968    | 84       |  |  |  |  |  |
| 12969    | 84       |  |  |  |  |  |
| 12970    | 84       |  |  |  |  |  |
| 12971    | 84       |  |  |  |  |  |
| 12972    | 84       |  |  |  |  |  |

| Ereignis | Aufnahme | DAPI/CK-PE                                                                          | CK-PE                                                                               | DAPI                                                                                 | CD45-APC                                                                              | HER-2/neu                                                                             |
|----------|----------|-------------------------------------------------------------------------------------|-------------------------------------------------------------------------------------|--------------------------------------------------------------------------------------|---------------------------------------------------------------------------------------|---------------------------------------------------------------------------------------|
| 12973    | 84       | 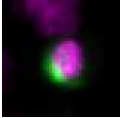   |    |    |    |    |
| 12974    | 84       |    |    |    |    |    |
| 12975    | 84       |    |    |    |    |    |
| 12976    | 84       |    |    |    |    |    |
| 12977    | 84       |    |    |    |    |    |
| 12978    | 84       |   |   |   |   |   |
| 12979    | 84       |  |  |  |  |  |
| 12980    | 84       |  |  |  |  |  |
| 12981    | 84       |  |  |  |  |  |
| 12982    | 84       |  |  |  |  |  |
| 12983    | 84       |  |  |  |  |  |
| 12984    | 84       |  |  |  |  |  |



| Ereignis | Aufnahme | DAPI/CK-PE                                                                          | CK-PE                                                                               | DAPI                                                                                 | CD45-APC                                                                              | HER-2/neu                                                                             |
|----------|----------|-------------------------------------------------------------------------------------|-------------------------------------------------------------------------------------|--------------------------------------------------------------------------------------|---------------------------------------------------------------------------------------|---------------------------------------------------------------------------------------|
| 12985    | 84       | 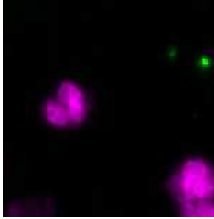   |    |    |    |    |
| 12986    | 84       |    |    |    |    |    |
| 12987    | 84       |    |    |    |    |    |
| 12988    | 84       |    |    |    |    |    |
| 12989    | 84       |    |    |    |    |    |
| 12990    | 84       |   |   |   |   |   |
| 12991    | 84       |  |  |  |  |  |
| 12992    | 84       |  |  |  |  |  |
| 12993    | 84       |  |  |  |  |  |
| 12994    | 84       |  |  |  |  |  |
| 12995    | 84       |  |  |  |  |  |
| 12996    | 84       |  |  |  |  |  |

| Ereignis                                                                                | Aufnahme | DAPI/CK-PE | CK-PE | DAPI | CD45-APC | HER-2/neu |
|-----------------------------------------------------------------------------------------|----------|------------|-------|------|----------|-----------|
| 12997                                                                                   | 84       |            |       |      |          |           |
|  12998 | 84       |            |       |      |          |           |
| 12999                                                                                   | 84       |            |       |      |          |           |
| 13000                                                                                   | 84       |            |       |      |          |           |
| 13001                                                                                   | 84       |            |       |      |          |           |
| 13002                                                                                   | 84       |            |       |      |          |           |
| 13003                                                                                   | 84       |            |       |      |          |           |
| 13004                                                                                   | 84       |            |       |      |          |           |
| 13005                                                                                   | 84       |            |       |      |          |           |
| 13006                                                                                   | 84       |            |       |      |          |           |
| 13007                                                                                   | 84       |            |       |      |          |           |
| 13008                                                                                   | 84       |            |       |      |          |           |

| Ereignis | Aufnahme | DAPI/CK-PE                                                                          | CK-PE                                                                               | DAPI                                                                                 | CD45-APC                                                                              | HER-2/neu                                                                             |
|----------|----------|-------------------------------------------------------------------------------------|-------------------------------------------------------------------------------------|--------------------------------------------------------------------------------------|---------------------------------------------------------------------------------------|---------------------------------------------------------------------------------------|
| 13009    | 84       | 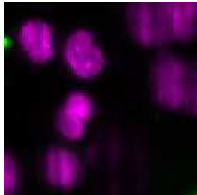   |    |    |    |    |
| 13010    | 84       |    |    |    |    |    |
| 13011    | 84       |    |    |    |    |    |
| 13012    | 84       |    |    |    |    |    |
| 13013    | 84       |    |    |    |    |    |
| 13014    | 84       |   |   |   |   |   |
| 13015    | 84       |  |  |  |  |  |
| 13016    | 84       |  |  |  |  |  |
| 13017    | 84       |  |  |  |  |  |
| 13018    | 84       |  |  |  |  |  |
| 13019    | 84       |  |  |  |  |  |

| Ereignis                                                                                | Aufnahme | DAPI/CK-PE | CK-PE | DAPI | CD45-APC | HER-2/neu |
|-----------------------------------------------------------------------------------------|----------|------------|-------|------|----------|-----------|
| 13020                                                                                   | 84       |            |       |      |          |           |
| 13021                                                                                   | 84       |            |       |      |          |           |
|  13022 | 84       |            |       |      |          |           |
| 13023                                                                                   | 84       |            |       |      |          |           |
| 13024                                                                                   | 84       |            |       |      |          |           |
| 13025                                                                                   | 84       |            |       |      |          |           |
| 13026                                                                                   | 84       |            |       |      |          |           |
| 13027                                                                                   | 84       |            |       |      |          |           |
| 13028                                                                                   | 84       |            |       |      |          |           |
| 13029                                                                                   | 84       |            |       |      |          |           |
| 13030                                                                                   | 84       |            |       |      |          |           |
| 13031                                                                                   | 84       |            |       |      |          |           |
| 13032                                                                                   | 84       |            |       |      |          |           |

| Ereignis                                                                                     | Aufnahme | DAPI/CK-PE                                                                          | CK-PE                                                                               | DAPI                                                                                 | CD45-APC                                                                              | HER-2/neu                                                                             |
|----------------------------------------------------------------------------------------------|----------|-------------------------------------------------------------------------------------|-------------------------------------------------------------------------------------|--------------------------------------------------------------------------------------|---------------------------------------------------------------------------------------|---------------------------------------------------------------------------------------|
| 13033<br>   | 84       |    |    |    |    |    |
| 13034                                                                                        | 84       |    |    |    |    |    |
| 13035                                                                                        | 84       |    |    |    |    |    |
| 13036                                                                                        | 84       |    |    |    |    |    |
| 13037<br> | 84       |   |   |   |   |   |
| 13038                                                                                        | 84       |  |  |  |  |  |
| 13039                                                                                        | 84       |  |  |  |  |  |
| 13040                                                                                        | 84       |  |  |  |  |  |
| 13041                                                                                        | 84       |  |  |  |  |  |
| 13042                                                                                        | 84       |  |  |  |  |  |
| 13043                                                                                        | 84       |  |  |  |  |  |



| Ereignis | Aufnahme | DAPI/CK-PE | CK-PE | DAPI | CD45-APC | HER-2/neu |
|----------|----------|------------|-------|------|----------|-----------|
| 13044    | 84       |            |       |      |          |           |
| 13045    | 84       |            |       |      |          |           |
| 13046    | 84       |            |       |      |          |           |
| 13047    | 84       |            |       |      |          |           |
| 13048    | 84       |            |       |      |          |           |
| 13049    | 84       |            |       |      |          |           |
| 13050    | 84       |            |       |      |          |           |
| 13051    | 84       |            |       |      |          |           |
| 13052    | 84       |            |       |      |          |           |
| 13053    | 84       |            |       |      |          |           |
| 13054    | 84       |            |       |      |          |           |
| 13055    | 84       |            |       |      |          |           |



| Ereignis                                                                                  | Aufnahme | DAPI/CK-PE | CK-PE | DAPI | CD45-APC | HER-2/neu |
|-------------------------------------------------------------------------------------------|----------|------------|-------|------|----------|-----------|
| 13056                                                                                     | 84       |            |       |      |          |           |
| 13057                                                                                     | 84       |            |       |      |          |           |
| 13058                                                                                     | 84       |            |       |      |          |           |
|  13059   | 84       |            |       |      |          |           |
| 13060                                                                                     | 84       |            |       |      |          |           |
|  13061 | 84       |            |       |      |          |           |
| 13062                                                                                     | 83       |            |       |      |          |           |
|  13063 | 57       |            |       |      |          |           |
| 13064                                                                                     | 83       |            |       |      |          |           |
|  13065 | 57       |            |       |      |          |           |

| Ereignis | Aufnahme | DAPI/CK-PE | CK-PE | DAPI | CD45-APC | HER-2/neu |
|----------|----------|------------|-------|------|----------|-----------|
| 13066    | 83       |            |       |      |          |           |
| 13067    | 84       |            |       |      |          |           |
| 13068    | 57       |            |       |      |          |           |
| 13069    | 57       |            |       |      |          |           |
| 13070    | 85       |            |       |      |          |           |
| 13071    | 85       |            |       |      |          |           |
| 13072    | 85       |            |       |      |          |           |
| 13073    | 85       |            |       |      |          |           |
| 13074    | 85       |            |       |      |          |           |
| 13075    | 85       |            |       |      |          |           |
| 13076    | 85       |            |       |      |          |           |
| 13077    | 85       |            |       |      |          |           |
| 13078    | 85       |            |       |      |          |           |

| Ereignis | Aufnahme | DAPI/CK-PE | CK-PE | DAPI | CD45-APC | HER-2/neu |
|----------|----------|------------|-------|------|----------|-----------|
| 13079    | 85       |            |       |      |          |           |
| 13080    | 85       |            |       |      |          |           |
| 13081    | 85       |            |       |      |          |           |
| 13082    | 85       |            |       |      |          |           |
| 13083    | 85       |            |       |      |          |           |
| 13084    | 85       |            |       |      |          |           |
| 13085    | 85       |            |       |      |          |           |
| 13086    | 85       |            |       |      |          |           |
| 13087    | 85       |            |       |      |          |           |
| 13088    | 85       |            |       |      |          |           |
| 13089    | 85       |            |       |      |          |           |

| Ereignis                                                                                  | Aufnahme | DAPI/CK-PE                                                                          | CK-PE                                                                               | DAPI                                                                                 | CD45-APC                                                                              | HER-2/neu                                                                             |
|-------------------------------------------------------------------------------------------|----------|-------------------------------------------------------------------------------------|-------------------------------------------------------------------------------------|--------------------------------------------------------------------------------------|---------------------------------------------------------------------------------------|---------------------------------------------------------------------------------------|
| 13090    | 85       |    |    |    |    |    |
| 13091    | 85       |    |    |    |    |    |
| 13092                                                                                     | 85       |    |    |    |    |    |
| 13093                                                                                     | 85       |    |    |    |    |    |
| 13094                                                                                     | 85       |    |    |    |    |    |
| 13095                                                                                     | 85       |   |   |   |   |   |
| 13096                                                                                     | 85       |  |  |  |  |  |
| 13097                                                                                     | 85       |  |  |  |  |  |
| 13098                                                                                     | 85       |  |  |  |  |  |
| 13099  | 85       |  |  |  |  |  |
| 13100  | 85       |  |  |  |  |  |



| Ereignis                                                                                  | Aufnahme | DAPI/CK-PE | CK-PE | DAPI | CD45-APC | HER-2/neu |
|-------------------------------------------------------------------------------------------|----------|------------|-------|------|----------|-----------|
| 13101                                                                                     | 85       |            |       |      |          |           |
| 13102                                                                                     | 85       |            |       |      |          |           |
| 13103                                                                                     | 85       |            |       |      |          |           |
| 13104                                                                                     | 85       |            |       |      |          |           |
| 13105                                                                                     | 85       |            |       |      |          |           |
| 13106                                                                                     | 85       |            |       |      |          |           |
| 13107                                                                                     | 85       |            |       |      |          |           |
| 13108                                                                                     | 85       |            |       |      |          |           |
| 13109                                                                                     | 85       |            |       |      |          |           |
| 13110                                                                                     | 85       |            |       |      |          |           |
|  13111 | 85       |            |       |      |          |           |
| 13112                                                                                     | 85       |            |       |      |          |           |

| Ereignis | Aufnahme | DAPI/CK-PE                                                                          | CK-PE                                                                               | DAPI                                                                                 | CD45-APC                                                                              | HER-2/neu                                                                             |
|----------|----------|-------------------------------------------------------------------------------------|-------------------------------------------------------------------------------------|--------------------------------------------------------------------------------------|---------------------------------------------------------------------------------------|---------------------------------------------------------------------------------------|
| 13113    | 85       | 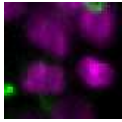   |    |    |    |    |
| 13114    | 85       |    |    |    |    |    |
| 13115    | 85       |    |    |    |    |    |
| 13116    | 85       |    |    |    |    |    |
| 13117    | 85       |    |    |    |    |    |
| 13118    | 85       |    |    |    |    |    |
| 13119    | 85       |   |   |   |   |   |
| 13120    | 85       |  |  |  |  |  |
| 13121    | 85       |  |  |  |  |  |
| 13122    | 85       |  |  |  |  |  |
| 13123    | 85       |  |  |  |  |  |
| 13124    | 85       |  |  |  |  |  |
| 13125    | 85       |  |  |  |  |  |

| Ereignis | Aufnahme | DAPI/CK-PE | CK-PE | DAPI | CD45-APC | HER-2/neu |
|----------|----------|------------|-------|------|----------|-----------|
| 13126    | 85       |            |       |      |          |           |
| 13127    | 85       |            |       |      |          |           |
| 13128    | 85       |            |       |      |          |           |
| 13129    | 85       |            |       |      |          |           |
| 13130    | 85       |            |       |      |          |           |
| 13131    | 85       |            |       |      |          |           |
| 13132    | 85       |            |       |      |          |           |
| 13133    | 85       |            |       |      |          |           |
| 13134    | 85       |            |       |      |          |           |
| 13135    | 85       |            |       |      |          |           |
| 13136    | 85       |            |       |      |          |           |
| 13137    | 85       |            |       |      |          |           |
| 13138    | 85       |            |       |      |          |           |

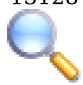

| Ereignis | Aufnahme | DAPI/CK-PE | CK-PE | DAPI | CD45-APC | HER-2/neu |
|----------|----------|------------|-------|------|----------|-----------|
| 13139    | 85       |            |       |      |          |           |
| 13140    | 85       |            |       |      |          |           |
| 13141    | 85       |            |       |      |          |           |
| 13142    | 85       |            |       |      |          |           |
| 13143    | 85       |            |       |      |          |           |
| 13144    | 85       |            |       |      |          |           |
| 13145    | 85       |            |       |      |          |           |
| 13146    | 85       |            |       |      |          |           |
| 13147    | 85       |            |       |      |          |           |
| 13148    | 85       |            |       |      |          |           |
| 13149    | 85       |            |       |      |          |           |
| 13150    | 85       |            |       |      |          |           |
| 13151    | 85       |            |       |      |          |           |
| 13152    | 85       |            |       |      |          |           |

| Ereignis | Aufnahme | DAPI/CK-PE | CK-PE | DAPI | CD45-APC | HER-2/neu |
|----------|----------|------------|-------|------|----------|-----------|
| 13153    | 85       |            |       |      |          |           |
| 13154    | 85       |            |       |      |          |           |
| 13155    | 85       |            |       |      |          |           |
| 13156    | 85       |            |       |      |          |           |
| 13157    | 85       |            |       |      |          |           |
| 13158    | 85       |            |       |      |          |           |
| 13159    | 85       |            |       |      |          |           |
| 13160    | 85       |            |       |      |          |           |
| 13161    | 85       |            |       |      |          |           |
| 13162    | 85       |            |       |      |          |           |
| 13163    | 85       |            |       |      |          |           |
| 13164    | 85       |            |       |      |          |           |
| 13165    | 85       |            |       |      |          |           |
| 13166    | 85       |            |       |      |          |           |



| Ereignis | Aufnahme | DAPI/CK-PE                                                                          | CK-PE                                                                               | DAPI                                                                                 | CD45-APC                                                                              | HER-2/neu                                                                             |
|----------|----------|-------------------------------------------------------------------------------------|-------------------------------------------------------------------------------------|--------------------------------------------------------------------------------------|---------------------------------------------------------------------------------------|---------------------------------------------------------------------------------------|
| 13167    | 85       | 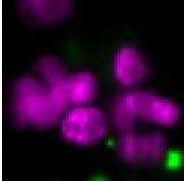   |    |    |    |    |
| 13168    | 85       |    |    |    |    |    |
| 13169    | 85       |    |    |    |    |    |
| 13170    | 85       |    |    |    |    |    |
| 13171    | 85       |   |   |   |   |   |
| 13172    | 85       |  |  |  |  |  |
| 13173    | 85       |  |  |  |  |  |
| 13174    | 85       |  |  |  |  |  |
| 13175    | 85       |  |  |  |  |  |
| 13176    | 85       |  |  |  |  |  |
| 13177    | 85       |  |  |  |  |  |
| 13178    | 85       |  |  |  |  |  |

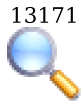

| Ereignis | Aufnahme | DAPI/CK-PE                                                                          | CK-PE                                                                               | DAPI                                                                                 | CD45-APC                                                                              | HER-2/neu                                                                             |
|----------|----------|-------------------------------------------------------------------------------------|-------------------------------------------------------------------------------------|--------------------------------------------------------------------------------------|---------------------------------------------------------------------------------------|---------------------------------------------------------------------------------------|
| 13179    | 85       | 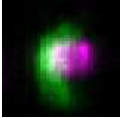   |    |    |    |    |
| 13180    | 85       |    |    |    |    |    |
| 13181    | 85       |    |    |    |    |    |
| 13182    | 85       |    |    |    |    |    |
| 13183    | 85       |    |    |    |    |    |
| 13184    | 85       |   |   |   |   |   |
| 13185    | 85       |  |  |  |  |  |
| 13186    | 85       |  |  |  |  |  |
| 13187    | 85       |  |  |  |  |  |
| 13188    | 85       |  |  |  |  |  |
| 13189    | 85       |  |  |  |  |  |

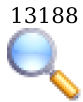

| Ereignis | Aufnahme | DAPI/CK-PE | CK-PE | DAPI | CD45-APC | HER-2/neu |
|----------|----------|------------|-------|------|----------|-----------|
| 13190    | 85       |            |       |      |          |           |
| 13191    | 85       |            |       |      |          |           |
| 13192    | 85       |            |       |      |          |           |
| 13193    | 85       |            |       |      |          |           |
| 13194    | 85       |            |       |      |          |           |
| 13195    | 85       |            |       |      |          |           |
| 13196    | 85       |            |       |      |          |           |
| 13197    | 85       |            |       |      |          |           |
| 13198    | 85       |            |       |      |          |           |
| 13199    | 85       |            |       |      |          |           |
| 13200    | 85       |            |       |      |          |           |
| 13201    | 85       |            |       |      |          |           |
| 13202    | 85       |            |       |      |          |           |

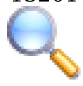

| Ereignis                                                                                  | Aufnahme | DAPI/CK-PE                                                                          | CK-PE                                                                               | DAPI                                                                                 | CD45-APC                                                                              | HER-2/neu                                                                             |
|-------------------------------------------------------------------------------------------|----------|-------------------------------------------------------------------------------------|-------------------------------------------------------------------------------------|--------------------------------------------------------------------------------------|---------------------------------------------------------------------------------------|---------------------------------------------------------------------------------------|
| 13203                                                                                     | 85       | 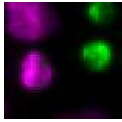   |    |    |    |    |
| 13204                                                                                     | 85       |    |    |    |    |    |
| 13205                                                                                     | 85       |    |    |    |    |    |
| 13206                                                                                     | 85       |    |    |    |    |    |
| 13207                                                                                     | 85       |    |    |    |    |    |
| 13208                                                                                     | 85       |    |    |    |    |    |
| 13209                                                                                     | 85       |   |   |   |   |   |
|  13210 | 85       |  |  |  |  |  |
| 13211                                                                                     | 85       |  |  |  |  |  |
| 13212                                                                                     | 85       |  |  |  |  |  |
| 13213                                                                                     | 85       |  |  |  |  |  |
| 13214                                                                                     | 85       |  |  |  |  |  |
| 13215                                                                                     | 85       |  |  |  |  |  |

| Ereignis | Aufnahme | DAPI/CK-PE | CK-PE | DAPI | CD45-APC | HER-2/neu |
|----------|----------|------------|-------|------|----------|-----------|
| 13216    | 85       |            |       |      |          |           |
| 13217    | 85       |            |       |      |          |           |
| 13218    | 85       |            |       |      |          |           |
| 13219    | 85       |            |       |      |          |           |
| 13220    | 85       |            |       |      |          |           |
| 13221    | 85       |            |       |      |          |           |
| 13222    | 85       |            |       |      |          |           |
| 13223    | 85       |            |       |      |          |           |
| 13224    | 85       |            |       |      |          |           |
| 13225    | 85       |            |       |      |          |           |
| 13226    | 85       |            |       |      |          |           |
| 13227    | 85       |            |       |      |          |           |

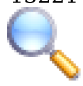



| Ereignis | Aufnahme | DAPI/CK-PE | CK-PE | DAPI | CD45-APC | HER-2/neu |
|----------|----------|------------|-------|------|----------|-----------|
| 13228    | 85       |            |       |      |          |           |
| 13229    | 85       |            |       |      |          |           |
| 13230    | 85       |            |       |      |          |           |
| 13231    | 85       |            |       |      |          |           |
| 13232    | 85       |            |       |      |          |           |
| 13233    | 85       |            |       |      |          |           |
| 13234    | 85       |            |       |      |          |           |
| 13235    | 85       |            |       |      |          |           |
| 13236    | 85       |            |       |      |          |           |
| 13237    | 85       |            |       |      |          |           |
| 13238    | 85       |            |       |      |          |           |
| 13239    | 85       |            |       |      |          |           |
| 13240    | 85       |            |       |      |          |           |

| Ereignis | Aufnahme | DAPI/CK-PE | CK-PE | DAPI | CD45-APC | HER-2/neu |
|----------|----------|------------|-------|------|----------|-----------|
| 13241    | 85       |            |       |      |          |           |
| 13242    | 85       |            |       |      |          |           |
| 13243    | 85       |            |       |      |          |           |
| 13244    | 85       |            |       |      |          |           |
| 13245    | 85       |            |       |      |          |           |
| 13246    | 85       |            |       |      |          |           |
| 13247    | 85       |            |       |      |          |           |
| 13248    | 85       |            |       |      |          |           |
| 13249    | 85       |            |       |      |          |           |
| 13250    | 85       |            |       |      |          |           |
| 13251    | 85       |            |       |      |          |           |
| 13252    | 85       |            |       |      |          |           |

| Ereignis                                                                                  | Aufnahme | DAPI/CK-PE                                                                          | CK-PE                                                                               | DAPI                                                                                 | CD45-APC                                                                              | HER-2/neu                                                                             |
|-------------------------------------------------------------------------------------------|----------|-------------------------------------------------------------------------------------|-------------------------------------------------------------------------------------|--------------------------------------------------------------------------------------|---------------------------------------------------------------------------------------|---------------------------------------------------------------------------------------|
| 13253                                                                                     | 85       | 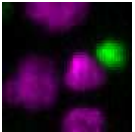   |    |    |    |    |
| 13254                                                                                     | 85       |    |    |    |    |    |
| 13255                                                                                     | 85       |    |    |    |    |    |
| 13256                                                                                     | 85       |    |    |    |    |    |
| 13257                                                                                     | 85       |    |    |    |    |    |
| 13258                                                                                     | 85       |    |    |    |    |    |
| 13259                                                                                     | 85       |   |   |   |   |   |
| 13260                                                                                     | 85       |  |  |  |  |  |
| 13261                                                                                     | 85       |  |  |  |  |  |
| 13262                                                                                     | 85       |  |  |  |  |  |
| 13263                                                                                     | 85       |  |  |  |  |  |
| 13264                                                                                     | 85       |  |  |  |  |  |
|  13265 | 85       |  |  |  |  |  |

| Ereignis | Aufnahme | DAPI/CK-PE | CK-PE | DAPI | CD45-APC | HER-2/neu |
|----------|----------|------------|-------|------|----------|-----------|
| 13266    | 85       |            |       |      |          |           |
| 13267    | 85       |            |       |      |          |           |
| 13268    | 85       |            |       |      |          |           |
| 13269    | 85       |            |       |      |          |           |
| 13270    | 85       |            |       |      |          |           |
| 13271    | 85       |            |       |      |          |           |
| 13272    | 85       |            |       |      |          |           |
| 13273    | 85       |            |       |      |          |           |
| 13274    | 85       |            |       |      |          |           |
| 13275    | 85       |            |       |      |          |           |
| 13276    | 85       |            |       |      |          |           |

| Ereignis | Aufnahme | DAPI/CK-PE | CK-PE | DAPI | CD45-APC | HER-2/neu |
|----------|----------|------------|-------|------|----------|-----------|
| 13277    | 85       |            |       |      |          |           |
| 13278    | 85       |            |       |      |          |           |
| 13279    | 85       |            |       |      |          |           |
| 13280    | 85       |            |       |      |          |           |
| 13281    | 85       |            |       |      |          |           |
| 13282    | 85       |            |       |      |          |           |
| 13283    | 85       |            |       |      |          |           |
| 13284    | 85       |            |       |      |          |           |
| 13285    | 85       |            |       |      |          |           |
| 13286    | 85       |            |       |      |          |           |
| 13287    | 85       |            |       |      |          |           |
| 13288    | 85       |            |       |      |          |           |
| 13289    | 85       |            |       |      |          |           |



| Ereignis | Aufnahme | DAPI/CK-PE                                                                          | CK-PE                                                                               | DAPI                                                                                 | CD45-APC                                                                              | HER-2/neu                                                                             |
|----------|----------|-------------------------------------------------------------------------------------|-------------------------------------------------------------------------------------|--------------------------------------------------------------------------------------|---------------------------------------------------------------------------------------|---------------------------------------------------------------------------------------|
| 13290    | 85       | 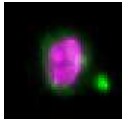   |    |    |    |    |
| 13291    | 85       |    |    |    |    |    |
| 13292    | 85       |    |    |    |    |    |
| 13293    | 85       |    |    |    |    |    |
| 13294    | 85       |    |    |    |    |    |
| 13295    | 85       |    |    |    |    |    |
| 13296    | 85       |   |   |   |   |   |
| 13297    | 85       |  |  |  |  |  |
| 13298    | 85       |  |  |  |  |  |
| 13299    | 85       |  |  |  |  |  |
| 13300    | 85       |  |  |  |  |  |
| 13301    | 85       |  |  |  |  |  |
| 13302    | 85       |  |  |  |  |  |

| Ereignis | Aufnahme | DAPI/CK-PE | CK-PE | DAPI | CD45-APC | HER-2/neu |
|----------|----------|------------|-------|------|----------|-----------|
| 13303    | 85       |            |       |      |          |           |
| 13304    | 85       |            |       |      |          |           |
| 13305    | 85       |            |       |      |          |           |
| 13306    | 85       |            |       |      |          |           |
| 13307    | 85       |            |       |      |          |           |
| 13308    | 85       |            |       |      |          |           |
| 13309    | 85       |            |       |      |          |           |
| 13310    | 85       |            |       |      |          |           |
| 13311    | 85       |            |       |      |          |           |
| 13312    | 85       |            |       |      |          |           |
| 13313    | 85       |            |       |      |          |           |
| 13314    | 85       |            |       |      |          |           |
| 13315    | 85       |            |       |      |          |           |

| Ereignis | Aufnahme | DAPI/CK-PE | CK-PE | DAPI | CD45-APC | HER-2/neu |
|----------|----------|------------|-------|------|----------|-----------|
| 13316    | 85       |            |       |      |          |           |
| 13317    | 85       |            |       |      |          |           |
| 13318    | 85       |            |       |      |          |           |
| 13319    | 85       |            |       |      |          |           |
| 13320    | 85       |            |       |      |          |           |
| 13321    | 85       |            |       |      |          |           |
| 13322    | 85       |            |       |      |          |           |
| 13323    | 85       |            |       |      |          |           |
| 13324    | 85       |            |       |      |          |           |
| 13325    | 85       |            |       |      |          |           |
| 13326    | 85       |            |       |      |          |           |
| 13327    | 85       |            |       |      |          |           |

| Ereignis | Aufnahme | DAPI/CK-PE | CK-PE | DAPI | CD45-APC | HER-2/neu |
|----------|----------|------------|-------|------|----------|-----------|
| 13328    | 85       |            |       |      |          |           |
|          |          |            |       |      |          |           |
| 13329    | 85       |            |       |      |          |           |
| 13330    | 85       |            |       |      |          |           |
| 13331    | 85       |            |       |      |          |           |
| 13332    | 85       |            |       |      |          |           |
| 13333    | 85       |            |       |      |          |           |
| 13334    | 85       |            |       |      |          |           |
| 13335    | 85       |            |       |      |          |           |
|          |          |            |       |      |          |           |
| 13336    | 85       |            |       |      |          |           |
| 13337    | 85       |            |       |      |          |           |
| 13338    | 85       |            |       |      |          |           |

| Ereignis | Aufnahme | DAPI/CK-PE | CK-PE | DAPI | CD45-APC | HER-2/neu |
|----------|----------|------------|-------|------|----------|-----------|
| 13339    | 85       |            |       |      |          |           |
| 13340    | 85       |            |       |      |          |           |
| 13341    | 85       |            |       |      |          |           |
| 13342    | 85       |            |       |      |          |           |
| 13343    | 85       |            |       |      |          |           |
| 13344    | 85       |            |       |      |          |           |
| 13345    | 85       |            |       |      |          |           |
| 13346    | 85       |            |       |      |          |           |
| 13347    | 85       |            |       |      |          |           |
| 13348    | 85       |            |       |      |          |           |
| 13349    | 85       |            |       |      |          |           |
| 13350    | 85       |            |       |      |          |           |



| Ereignis                                                                                  | Aufnahme | DAPI/CK-PE | CK-PE | DAPI | CD45-APC | HER-2/neu |
|-------------------------------------------------------------------------------------------|----------|------------|-------|------|----------|-----------|
| 13351                                                                                     | 85       |            |       |      |          |           |
| 13352                                                                                     | 85       |            |       |      |          |           |
| 13353                                                                                     | 85       |            |       |      |          |           |
| 13354                                                                                     | 85       |            |       |      |          |           |
| 13355                                                                                     | 85       |            |       |      |          |           |
| 13356                                                                                     | 85       |            |       |      |          |           |
| 13357                                                                                     | 85       |            |       |      |          |           |
| 13358                                                                                     | 85       |            |       |      |          |           |
| 13359                                                                                     | 85       |            |       |      |          |           |
| 13360                                                                                     | 85       |            |       |      |          |           |
| 13361                                                                                     | 85       |            |       |      |          |           |
| 13362                                                                                     | 85       |            |       |      |          |           |
|  13363 | 85       |            |       |      |          |           |

| Ereignis | Aufnahme | DAPI/CK-PE | CK-PE | DAPI | CD45-APC | HER-2/neu |
|----------|----------|------------|-------|------|----------|-----------|
| 13364    | 85       |            |       |      |          |           |
| 13365    | 85       |            |       |      |          |           |
| 13366    | 85       |            |       |      |          |           |
| 13367    | 85       |            |       |      |          |           |
| 13368    | 85       |            |       |      |          |           |
| 13369    | 85       |            |       |      |          |           |
| 13370    | 85       |            |       |      |          |           |
| 13371    | 85       |            |       |      |          |           |
| 13372    | 85       |            |       |      |          |           |
| 13373    | 85       |            |       |      |          |           |
| 13374    | 85       |            |       |      |          |           |
| 13375    | 85       |            |       |      |          |           |
| 13376    | 85       |            |       |      |          |           |
| 13377    | 85       |            |       |      |          |           |

| Ereignis | Aufnahme | DAPI/CK-PE | CK-PE | DAPI | CD45-APC | HER-2/neu |
|----------|----------|------------|-------|------|----------|-----------|
| 13378    | 85       |            |       |      |          |           |
| 13379    | 85       |            |       |      |          |           |
| 13380    | 85       |            |       |      |          |           |
| 13381    | 85       |            |       |      |          |           |
| 13382    | 85       |            |       |      |          |           |
| 13383    | 85       |            |       |      |          |           |
| 13384    | 85       |            |       |      |          |           |
| 13385    | 85       |            |       |      |          |           |
| 13386    | 85       |            |       |      |          |           |
| 13387    | 85       |            |       |      |          |           |
| 13388    | 85       |            |       |      |          |           |
| 13389    | 85       |            |       |      |          |           |

| Ereignis | Aufnahme | DAPI/CK-PE | CK-PE | DAPI | CD45-APC | HER-2/neu |
|----------|----------|------------|-------|------|----------|-----------|
| 13390    | 85       |            |       |      |          |           |
| 13391    | 85       |            |       |      |          |           |
| 13392    | 85       |            |       |      |          |           |
| 13393    | 85       |            |       |      |          |           |
| 13394    | 85       |            |       |      |          |           |
| 13395    | 85       |            |       |      |          |           |
| 13396    | 85       |            |       |      |          |           |
| 13397    | 85       |            |       |      |          |           |
| 13398    | 85       |            |       |      |          |           |
| 13399    | 85       |            |       |      |          |           |
| 13400    | 85       |            |       |      |          |           |
| 13401    | 85       |            |       |      |          |           |
| 13402    | 85       |            |       |      |          |           |
| 13403    | 85       |            |       |      |          |           |

| Ereignis | Aufnahme | DAPI/CK-PE                                                                          | CK-PE                                                                               | DAPI                                                                                 | CD45-APC                                                                              | HER-2/neu                                                                             |
|----------|----------|-------------------------------------------------------------------------------------|-------------------------------------------------------------------------------------|--------------------------------------------------------------------------------------|---------------------------------------------------------------------------------------|---------------------------------------------------------------------------------------|
| 13404    | 85       | 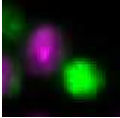   |    |    |    |    |
| 13405    | 85       |    |    |    |    |    |
| 13406    | 85       |    |    |    |    |    |
| 13407    | 85       |    |    |    |    |    |
| 13408    | 85       |    |    |    |    |    |
| 13409    | 85       |    |    |    |    |    |
| 13410    | 85       |   |   |   |   |   |
| 13411    | 85       |  |  |  |  |  |
| 13412    | 85       |  |  |  |  |  |
| 13413    | 85       |  |  |  |  |  |
| 13414    | 85       |  |  |  |  |  |
| 13415    | 85       |  |  |  |  |  |
| 13416    | 85       |  |  |  |  |  |
| 13417    | 85       |  |  |  |  |  |



| Ereignis                                                                                | Aufnahme | DAPI/CK-PE | CK-PE | DAPI | CD45-APC | HER-2/neu |
|-----------------------------------------------------------------------------------------|----------|------------|-------|------|----------|-----------|
| 13418                                                                                   | 85       |            |       |      |          |           |
| 13419                                                                                   | 85       |            |       |      |          |           |
| 13420                                                                                   | 85       |            |       |      |          |           |
| 13421                                                                                   | 85       |            |       |      |          |           |
|  13422 | 85       |            |       |      |          |           |
| 13423                                                                                   | 85       |            |       |      |          |           |
| 13424                                                                                   | 85       |            |       |      |          |           |
| 13425                                                                                   | 85       |            |       |      |          |           |
| 13426                                                                                   | 85       |            |       |      |          |           |
| 13427                                                                                   | 85       |            |       |      |          |           |
| 13428                                                                                   | 85       |            |       |      |          |           |
| 13429                                                                                   | 85       |            |       |      |          |           |

| Ereignis | Aufnahme | DAPI/CK-PE | CK-PE | DAPI | CD45-APC | HER-2/neu |
|----------|----------|------------|-------|------|----------|-----------|
| 13430    | 85       |            |       |      |          |           |
| 13431    | 85       |            |       |      |          |           |
| 13432    | 85       |            |       |      |          |           |
| 13433    | 85       |            |       |      |          |           |
| 13434    | 85       |            |       |      |          |           |
| 13435    | 85       |            |       |      |          |           |
| 13436    | 85       |            |       |      |          |           |
| 13437    | 85       |            |       |      |          |           |
| 13438    | 85       |            |       |      |          |           |
| 13439    | 85       |            |       |      |          |           |
| 13440    | 85       |            |       |      |          |           |
| 13441    | 85       |            |       |      |          |           |
| 13442    | 85       |            |       |      |          |           |

| Ereignis | Aufnahme | DAPI/CK-PE | CK-PE | DAPI | CD45-APC | HER-2/neu |
|----------|----------|------------|-------|------|----------|-----------|
| 13443    | 85       |            |       |      |          |           |
| 13444    | 85       |            |       |      |          |           |
| 13445    | 85       |            |       |      |          |           |
| 13446    | 85       |            |       |      |          |           |
| 13447    | 85       |            |       |      |          |           |
| 13448    | 85       |            |       |      |          |           |
| 13449    | 85       |            |       |      |          |           |
| 13450    | 85       |            |       |      |          |           |
| 13451    | 85       |            |       |      |          |           |
| 13452    | 85       |            |       |      |          |           |
| 13453    | 85       |            |       |      |          |           |
| 13454    | 85       |            |       |      |          |           |

| Ereignis                                                                                  | Aufnahme | DAPI/CK-PE | CK-PE | DAPI | CD45-APC | HER-2/neu |
|-------------------------------------------------------------------------------------------|----------|------------|-------|------|----------|-----------|
| 13455                                                                                     | 85       |            |       |      |          |           |
| 13456                                                                                     | 85       |            |       |      |          |           |
| 13457                                                                                     | 85       |            |       |      |          |           |
| 13458                                                                                     | 85       |            |       |      |          |           |
| 13459                                                                                     | 85       |            |       |      |          |           |
| 13460                                                                                     | 85       |            |       |      |          |           |
| 13461                                                                                     | 84       |            |       |      |          |           |
| 13462                                                                                     | 85       |            |       |      |          |           |
| 13463                                                                                     | 85       |            |       |      |          |           |
|  13464 | 85       |            |       |      |          |           |
| 13465                                                                                     | 84       |            |       |      |          |           |
| 13466                                                                                     | 84       |            |       |      |          |           |

| Ereignis | Aufnahme | DAPI/CK-PE | CK-PE | DAPI | CD45-APC | HER-2/neu |
|----------|----------|------------|-------|------|----------|-----------|
| 13467    | 85       |            |       |      |          |           |
| 13468    | 56       |            |       |      |          |           |
| 13469    | 56       |            |       |      |          |           |
| 13470    | 85       |            |       |      |          |           |
| 13471    | 85       |            |       |      |          |           |
| 13472    | 85       |            |       |      |          |           |
| 13473    | 56       |            |       |      |          |           |
| 13474    | 56       |            |       |      |          |           |
| 13475    | 85       |            |       |      |          |           |
| 13476    | 86       |            |       |      |          |           |



| Ereignis | Aufnahme | DAPI/CK-PE                                                                          | CK-PE                                                                               | DAPI                                                                                 | CD45-APC                                                                              | HER-2/neu                                                                             |
|----------|----------|-------------------------------------------------------------------------------------|-------------------------------------------------------------------------------------|--------------------------------------------------------------------------------------|---------------------------------------------------------------------------------------|---------------------------------------------------------------------------------------|
| 13477    | 86       | 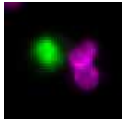   |    |    |    |    |
| 13478    | 86       |    |    |    |    |    |
| 13479    | 86       |    |    |    |    |    |
| 13480    | 86       |    |    |    |    |    |
| 13481    | 86       |    |    |    |    |    |
| 13482    | 86       |   |   |   |   |   |
| 13483    | 86       |  |  |  |  |  |
| 13484    | 86       |  |  |  |  |  |
| 13485    | 86       |  |  |  |  |  |
| 13486    | 86       |  |  |  |  |  |
| 13487    | 86       |  |  |  |  |  |
| 13488    | 86       |  |  |  |  |  |

| Ereignis | Aufnahme | DAPI/CK-PE | CK-PE | DAPI | CD45-APC | HER-2/neu |
|----------|----------|------------|-------|------|----------|-----------|
| 13489    | 86       |            |       |      |          |           |
| 13490    | 86       |            |       |      |          |           |
| 13491    | 86       |            |       |      |          |           |
| 13492    | 86       |            |       |      |          |           |
| 13493    | 86       |            |       |      |          |           |
| 13494    | 86       |            |       |      |          |           |
| 13495    | 86       |            |       |      |          |           |
| 13496    | 86       |            |       |      |          |           |
| 13497    | 86       |            |       |      |          |           |
| 13498    | 86       |            |       |      |          |           |
| 13499    | 86       |            |       |      |          |           |
| 13500    | 86       |            |       |      |          |           |

| Ereignis | Aufnahme | DAPI/CK-PE | CK-PE | DAPI | CD45-APC | HER-2/neu |
|----------|----------|------------|-------|------|----------|-----------|
| 13501    | 86       |            |       |      |          |           |
| 13502    | 86       |            |       |      |          |           |
| 13503    | 86       |            |       |      |          |           |
| 13504    | 86       |            |       |      |          |           |
| 13505    | 86       |            |       |      |          |           |
| 13506    | 86       |            |       |      |          |           |
| 13507    | 86       |            |       |      |          |           |
| 13508    | 86       |            |       |      |          |           |
| 13509    | 86       |            |       |      |          |           |
| 13510    | 86       |            |       |      |          |           |
| 13511    | 86       |            |       |      |          |           |
| 13512    | 86       |            |       |      |          |           |

| Ereignis | Aufnahme | DAPI/CK-PE | CK-PE | DAPI | CD45-APC | HER-2/neu |
|----------|----------|------------|-------|------|----------|-----------|
| 13513    | 86       |            |       |      |          |           |
| 13514    | 86       |            |       |      |          |           |
| 13515    | 86       |            |       |      |          |           |
| 13516    | 86       |            |       |      |          |           |
| 13517    | 86       |            |       |      |          |           |
| 13518    | 86       |            |       |      |          |           |
| 13519    | 86       |            |       |      |          |           |
| 13520    | 86       |            |       |      |          |           |
| 13521    | 86       |            |       |      |          |           |
| 13522    | 86       |            |       |      |          |           |
| 13523    | 86       |            |       |      |          |           |
| 13524    | 86       |            |       |      |          |           |



| Ereignis                                                                            | Aufnahme | DAPI/CK-PE                                                                          | CK-PE                                                                               | DAPI                                                                                 | CD45-APC                                                                              | HER-2/neu                                                                             |
|-------------------------------------------------------------------------------------|----------|-------------------------------------------------------------------------------------|-------------------------------------------------------------------------------------|--------------------------------------------------------------------------------------|---------------------------------------------------------------------------------------|---------------------------------------------------------------------------------------|
| 13525                                                                               | 86       | 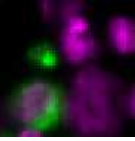   |    |    |    |    |
| 13526                                                                               | 86       |    |    |    |    |    |
| 13527                                                                               | 86       |    |    |    |    |    |
| 13528                                                                               | 86       |    |    |    |    |    |
| 13529                                                                               | 86       |    |    |    |    |    |
| 13530                                                                               | 86       |    |    |    |    |    |
| 13531                                                                               | 86       |   |   |   |   |   |
| 13532                                                                               | 86       |  |  |  |  |  |
|  |          |                                                                                     |                                                                                     |                                                                                      |                                                                                       |                                                                                       |
| 13533                                                                               | 86       |  |  |  |  |  |
|  |          |                                                                                     |                                                                                     |                                                                                      |                                                                                       |                                                                                       |
| 13534                                                                               | 86       |  |  |  |  |  |
| 13535                                                                               | 86       |  |  |  |  |  |
| 13536                                                                               | 86       |  |  |  |  |  |



| Ereignis                                                                                | Aufnahme | DAPI/CK-PE | CK-PE | DAPI | CD45-APC | HER-2/neu |
|-----------------------------------------------------------------------------------------|----------|------------|-------|------|----------|-----------|
| 13537                                                                                   | 86       |            |       |      |          |           |
| 13538                                                                                   | 86       |            |       |      |          |           |
| 13539                                                                                   | 86       |            |       |      |          |           |
| 13540                                                                                   | 86       |            |       |      |          |           |
| 13541                                                                                   | 86       |            |       |      |          |           |
|  13542 | 86       |            |       |      |          |           |
| 13543                                                                                   | 86       |            |       |      |          |           |
| 13544                                                                                   | 86       |            |       |      |          |           |
| 13545                                                                                   | 86       |            |       |      |          |           |
| 13546                                                                                   | 86       |            |       |      |          |           |
| 13547                                                                                   | 86       |            |       |      |          |           |
| 13548                                                                                   | 86       |            |       |      |          |           |

| Ereignis | Aufnahme | DAPI/CK-PE | CK-PE | DAPI | CD45-APC | HER-2/neu |
|----------|----------|------------|-------|------|----------|-----------|
| 13549    | 86       |            |       |      |          |           |
| 13550    | 86       |            |       |      |          |           |
| 13551    | 86       |            |       |      |          |           |
| 13552    | 86       |            |       |      |          |           |
| 13553    | 86       |            |       |      |          |           |
| 13554    | 86       |            |       |      |          |           |
| 13555    | 86       |            |       |      |          |           |
| 13556    | 86       |            |       |      |          |           |
| 13557    | 86       |            |       |      |          |           |
| 13558    | 86       |            |       |      |          |           |
| 13559    | 86       |            |       |      |          |           |
| 13560    | 86       |            |       |      |          |           |

| Ereignis | Aufnahme | DAPI/CK-PE | CK-PE | DAPI | CD45-APC | HER-2/neu |
|----------|----------|------------|-------|------|----------|-----------|
| 13561    | 86       |            |       |      |          |           |
| 13562    | 86       |            |       |      |          |           |
| 13563    | 86       |            |       |      |          |           |
| 13564    | 86       |            |       |      |          |           |
| 13565    | 86       |            |       |      |          |           |
| 13566    | 86       |            |       |      |          |           |
| 13567    | 86       |            |       |      |          |           |
| 13568    | 86       |            |       |      |          |           |
| 13569    | 86       |            |       |      |          |           |
| 13570    | 86       |            |       |      |          |           |
| 13571    | 86       |            |       |      |          |           |
| 13572    | 86       |            |       |      |          |           |

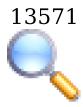

| Ereignis | Aufnahme | DAPI/CK-PE                                                                          | CK-PE                                                                               | DAPI                                                                                 | CD45-APC                                                                              | HER-2/neu                                                                             |
|----------|----------|-------------------------------------------------------------------------------------|-------------------------------------------------------------------------------------|--------------------------------------------------------------------------------------|---------------------------------------------------------------------------------------|---------------------------------------------------------------------------------------|
| 13573    | 86       | 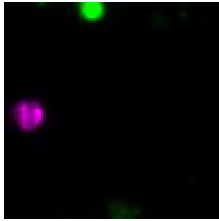   |    |    |    |    |
|          |          |    |    |    |    |    |
| 13574    | 86       |    |    |    |    |    |
| 13575    | 86       |    |    |    |    |    |
|          |          |    |    |    |    |    |
| 13576    | 86       |    |    |    |    |    |
| 13577    | 86       |   |   |   |   |   |
| 13578    | 86       |   |   |   |   |   |
|          |          |  |  |  |  |  |
| 13579    | 86       |  |  |  |  |  |
| 13580    | 86       |  |  |  |  |  |
| 13581    | 86       |  |  |  |  |  |
| 13582    | 86       |  |  |  |  |  |
| 13583    | 86       |  |  |  |  |  |
| 13584    | 86       |  |  |  |  |  |



| Ereignis | Aufnahme | DAPI/CK-PE | CK-PE | DAPI | CD45-APC | HER-2/neu |
|----------|----------|------------|-------|------|----------|-----------|
| 13585    | 86       |            |       |      |          |           |
| 13586    | 86       |            |       |      |          |           |
| 13587    | 86       |            |       |      |          |           |
| 13588    | 86       |            |       |      |          |           |
| 13589    | 86       |            |       |      |          |           |
| 13590    | 86       |            |       |      |          |           |
| 13591    | 86       |            |       |      |          |           |
| 13592    | 86       |            |       |      |          |           |
| 13593    | 86       |            |       |      |          |           |
| 13594    | 86       |            |       |      |          |           |
| 13595    | 86       |            |       |      |          |           |
| 13596    | 86       |            |       |      |          |           |



| Ereignis | Aufnahme | DAPI/CK-PE | CK-PE | DAPI | CD45-APC | HER-2/neu |
|----------|----------|------------|-------|------|----------|-----------|
| 13597    | 86       |            |       |      |          |           |
| 13598    | 86       |            |       |      |          |           |
| 13599    | 86       |            |       |      |          |           |
| 13600    | 86       |            |       |      |          |           |
| 13601    | 86       |            |       |      |          |           |
| 13602    | 86       |            |       |      |          |           |
| 13603    | 86       |            |       |      |          |           |
| 13604    | 86       |            |       |      |          |           |
| 13605    | 86       |            |       |      |          |           |
| 13606    | 86       |            |       |      |          |           |
| 13607    | 86       |            |       |      |          |           |
| 13608    | 86       |            |       |      |          |           |

| Ereignis | Aufnahme | DAPI/CK-PE | CK-PE | DAPI | CD45-APC | HER-2/neu |
|----------|----------|------------|-------|------|----------|-----------|
| 13609    | 86       |            |       |      |          |           |
| 13610    | 86       |            |       |      |          |           |
| 13611    | 86       |            |       |      |          |           |
| 13612    | 86       |            |       |      |          |           |
| 13613    | 86       |            |       |      |          |           |
| 13614    | 86       |            |       |      |          |           |
| 13615    | 86       |            |       |      |          |           |
| 13616    | 86       |            |       |      |          |           |
| 13617    | 86       |            |       |      |          |           |
| 13618    | 86       |            |       |      |          |           |
| 13619    | 86       |            |       |      |          |           |
| 13620    | 86       |            |       |      |          |           |



| Ereignis | Aufnahme | DAPI/CK-PE | CK-PE | DAPI | CD45-APC | HER-2/neu |
|----------|----------|------------|-------|------|----------|-----------|
| 13621    | 86       |            |       |      |          |           |
| 13622    | 86       |            |       |      |          |           |
| 13623    | 86       |            |       |      |          |           |
| 13624    | 86       |            |       |      |          |           |
| 13625    | 86       |            |       |      |          |           |
| 13626    | 86       |            |       |      |          |           |
| 13627    | 86       |            |       |      |          |           |
| 13628    | 86       |            |       |      |          |           |
| 13629    | 86       |            |       |      |          |           |
| 13630    | 86       |            |       |      |          |           |
| 13631    | 86       |            |       |      |          |           |

| Ereignis | Aufnahme | DAPI/CK-PE | CK-PE | DAPI | CD45-APC | HER-2/neu |
|----------|----------|------------|-------|------|----------|-----------|
| 13632    | 86       |            |       |      |          |           |
| 13633    | 86       |            |       |      |          |           |
| 13634    | 86       |            |       |      |          |           |
| 13635    | 86       |            |       |      |          |           |
| 13636    | 86       |            |       |      |          |           |
| 13637    | 86       |            |       |      |          |           |
| 13638    | 86       |            |       |      |          |           |
| 13639    | 86       |            |       |      |          |           |
| 13640    | 86       |            |       |      |          |           |
| 13641    | 86       |            |       |      |          |           |
| 13642    | 86       |            |       |      |          |           |
| 13643    | 86       |            |       |      |          |           |



| Ereignis | Aufnahme | DAPI/CK-PE | CK-PE | DAPI | CD45-APC | HER-2/neu |
|----------|----------|------------|-------|------|----------|-----------|
| 13644    | 86       |            |       |      |          |           |
| 13645    | 86       |            |       |      |          |           |
| 13646    | 86       |            |       |      |          |           |
| 13647    | 86       |            |       |      |          |           |
| 13648    | 86       |            |       |      |          |           |
| 13649    | 86       |            |       |      |          |           |
| 13650    | 86       |            |       |      |          |           |
| 13651    | 86       |            |       |      |          |           |
| 13652    | 86       |            |       |      |          |           |
| 13653    | 86       |            |       |      |          |           |
| 13654    | 86       |            |       |      |          |           |
| 13655    | 86       |            |       |      |          |           |
| 13656    | 86       |            |       |      |          |           |



| Ereignis | Aufnahme | DAPI/CK-PE | CK-PE | DAPI | CD45-APC | HER-2/neu |
|----------|----------|------------|-------|------|----------|-----------|
| 13657    | 86       |            |       |      |          |           |
| 13658    | 86       |            |       |      |          |           |
| 13659    | 86       |            |       |      |          |           |
| 13660    | 86       |            |       |      |          |           |
| 13661    | 86       |            |       |      |          |           |
| 13662    | 86       |            |       |      |          |           |
| 13663    | 86       |            |       |      |          |           |
| 13664    | 86       |            |       |      |          |           |
| 13665    | 86       |            |       |      |          |           |
| 13666    | 86       |            |       |      |          |           |
| 13667    | 86       |            |       |      |          |           |
| 13668    | 86       |            |       |      |          |           |

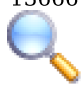

| Ereignis | Aufnahme | DAPI/CK-PE | CK-PE | DAPI | CD45-APC | HER-2/neu |
|----------|----------|------------|-------|------|----------|-----------|
| 13669    | 86       |            |       |      |          |           |
| 13670    | 86       |            |       |      |          |           |
| 13671    | 86       |            |       |      |          |           |
| 13672    | 86       |            |       |      |          |           |
| 13673    | 86       |            |       |      |          |           |
| 13674    | 86       |            |       |      |          |           |
| 13675    | 86       |            |       |      |          |           |
| 13676    | 86       |            |       |      |          |           |
| 13677    | 86       |            |       |      |          |           |
| 13678    | 86       |            |       |      |          |           |

| Ereignis | Aufnahme | DAPI/CK-PE                                                                          | CK-PE                                                                               | DAPI                                                                                 | CD45-APC                                                                              | HER-2/neu                                                                             |
|----------|----------|-------------------------------------------------------------------------------------|-------------------------------------------------------------------------------------|--------------------------------------------------------------------------------------|---------------------------------------------------------------------------------------|---------------------------------------------------------------------------------------|
| 13679    | 86       | 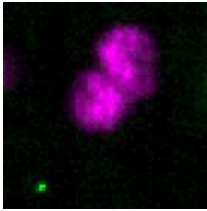   |    |    |    |    |
| 13680    | 86       |    |    |    |    |    |
| 13681    | 86       |    |    |    |    |    |
| 13682    | 86       |    |    |    |    |    |
| 13683    | 86       |    |    |    |    |    |
| 13684    | 86       |   |   |   |   |   |
| 13685    | 86       |  |  |  |  |  |
| 13686    | 86       |  |  |  |  |  |
| 13687    | 86       |  |  |  |  |  |
| 13688    | 86       |  |  |  |  |  |
| 13689    | 86       |  |  |  |  |  |

| Ereignis | Aufnahme | DAPI/CK-PE | CK-PE | DAPI | CD45-APC | HER-2/neu |
|----------|----------|------------|-------|------|----------|-----------|
| 13690    | 86       |            |       |      |          |           |
| 13691    | 86       |            |       |      |          |           |
| 13692    | 86       |            |       |      |          |           |
| 13693    | 86       |            |       |      |          |           |
| 13694    | 86       |            |       |      |          |           |
| 13695    | 86       |            |       |      |          |           |
| 13696    | 86       |            |       |      |          |           |
| 13697    | 86       |            |       |      |          |           |
| 13698    | 86       |            |       |      |          |           |
| 13699    | 86       |            |       |      |          |           |
| 13700    | 86       |            |       |      |          |           |
| 13701    | 86       |            |       |      |          |           |
| 13702    | 86       |            |       |      |          |           |

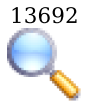



| Ereignis | Aufnahme | DAPI/CK-PE                                                                          | CK-PE                                                                               | DAPI                                                                                 | CD45-APC                                                                              | HER-2/neu                                                                             |
|----------|----------|-------------------------------------------------------------------------------------|-------------------------------------------------------------------------------------|--------------------------------------------------------------------------------------|---------------------------------------------------------------------------------------|---------------------------------------------------------------------------------------|
| 13703    | 86       | 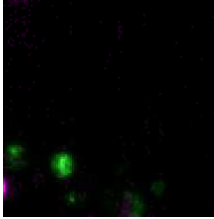   |    |    |    |    |
| 13704    | 86       |    |    |    |    |    |
| 13705    | 86       |    |    |    |    |    |
| 13706    | 86       |    |    |    |    |    |
| 13707    | 86       |    |    |    |    |    |
| 13708    | 86       |   |   |   |   |   |
| 13709    | 86       |  |  |  |  |  |
| 13710    | 86       |  |  |  |  |  |
| 13711    | 86       |  |  |  |  |  |
| 13712    | 86       |  |  |  |  |  |
| 13713    | 86       |  |  |  |  |  |
| 13714    | 86       |  |  |  |  |  |



| Ereignis | Aufnahme | DAPI/CK-PE | CK-PE | DAPI | CD45-APC | HER-2/neu |
|----------|----------|------------|-------|------|----------|-----------|
| 13715    | 86       |            |       |      |          |           |
| 13716    | 86       |            |       |      |          |           |
| 13717    | 86       |            |       |      |          |           |
| 13718    | 86       |            |       |      |          |           |
| 13719    | 86       |            |       |      |          |           |
| 13720    | 86       |            |       |      |          |           |
| 13721    | 86       |            |       |      |          |           |
| 13722    | 86       |            |       |      |          |           |
| 13723    | 85       |            |       |      |          |           |
| 13724    | 85       |            |       |      |          |           |
| 13725    | 85       |            |       |      |          |           |

| Ereignis | Aufnahme | DAPI/CK-PE | CK-PE | DAPI | CD45-APC | HER-2/neu |
|----------|----------|------------|-------|------|----------|-----------|
| 13726    | 86       |            |       |      |          |           |
| 13727    | 85       |            |       |      |          |           |
| 13728    | 85       |            |       |      |          |           |
| 13729    | 86       |            |       |      |          |           |
| 13730    | 86       |            |       |      |          |           |
| 13731    | 55       |            |       |      |          |           |
| 13732    | 55       |            |       |      |          |           |
| 13733    | 55       |            |       |      |          |           |
| 13734    | 55       |            |       |      |          |           |
| 13735    | 86       |            |       |      |          |           |

| Ereignis                                                                                  | Aufnahme | DAPI/CK-PE                                                                          | CK-PE                                                                               | DAPI                                                                                 | CD45-APC                                                                              | HER-2/neu                                                                             |
|-------------------------------------------------------------------------------------------|----------|-------------------------------------------------------------------------------------|-------------------------------------------------------------------------------------|--------------------------------------------------------------------------------------|---------------------------------------------------------------------------------------|---------------------------------------------------------------------------------------|
| 13736    | 86       |    |    |    |    |    |
| 13737                                                                                     | 87       |    |    |    |    |    |
| 13738                                                                                     | 87       |    |    |    |    |    |
| 13739                                                                                     | 87       |    |    |    |    |    |
| 13740                                                                                     | 87       |    |    |    |    |    |
| 13741                                                                                     | 87       |   |   |   |   |   |
| 13742  | 87       |  |  |  |  |  |
| 13743  | 87       |  |  |  |  |  |
| 13744                                                                                     | 87       |  |  |  |  |  |
| 13745                                                                                     | 87       |  |  |  |  |  |
| 13746                                                                                     | 87       |  |  |  |  |  |

| Ereignis | Aufnahme | DAPI/CK-PE | CK-PE | DAPI | CD45-APC | HER-2/neu |
|----------|----------|------------|-------|------|----------|-----------|
| 13747    | 87       |            |       |      |          |           |
| 13748    | 87       |            |       |      |          |           |
| 13749    | 87       |            |       |      |          |           |
| 13750    | 87       |            |       |      |          |           |
| 13751    | 87       |            |       |      |          |           |
| 13752    | 87       |            |       |      |          |           |
| 13753    | 87       |            |       |      |          |           |
| 13754    | 87       |            |       |      |          |           |
| 13755    | 87       |            |       |      |          |           |
| 13756    | 87       |            |       |      |          |           |
| 13757    | 87       |            |       |      |          |           |

| Ereignis | Aufnahme | DAPI/CK-PE | CK-PE | DAPI | CD45-APC | HER-2/neu |
|----------|----------|------------|-------|------|----------|-----------|
| 13758    | 87       |            |       |      |          |           |
| 13759    | 87       |            |       |      |          |           |
| 13760    | 87       |            |       |      |          |           |
| 13761    | 87       |            |       |      |          |           |
| 13762    | 87       |            |       |      |          |           |
| 13763    | 87       |            |       |      |          |           |
| 13764    | 87       |            |       |      |          |           |
| 13765    | 87       |            |       |      |          |           |
| 13766    | 87       |            |       |      |          |           |
| 13767    | 87       |            |       |      |          |           |
| 13768    | 87       |            |       |      |          |           |



| Ereignis | Aufnahme | DAPI/CK-PE | CK-PE | DAPI | CD45-APC | HER-2/neu |
|----------|----------|------------|-------|------|----------|-----------|
| 13769    | 87       |            |       |      |          |           |
| 13770    | 87       |            |       |      |          |           |
| 13771    | 87       |            |       |      |          |           |
| 13772    | 87       |            |       |      |          |           |
| 13773    | 87       |            |       |      |          |           |
| 13774    | 87       |            |       |      |          |           |
| 13775    | 87       |            |       |      |          |           |
| 13776    | 87       |            |       |      |          |           |
| 13777    | 87       |            |       |      |          |           |
| 13778    | 87       |            |       |      |          |           |
| 13779    | 87       |            |       |      |          |           |
| 13780    | 87       |            |       |      |          |           |

| Ereignis | Aufnahme | DAPI/CK-PE | CK-PE | DAPI | CD45-APC | HER-2/neu |
|----------|----------|------------|-------|------|----------|-----------|
| 13781    | 87       |            |       |      |          |           |
| 13782    | 87       |            |       |      |          |           |
| 13783    | 87       |            |       |      |          |           |
| 13784    | 87       |            |       |      |          |           |
| 13785    | 87       |            |       |      |          |           |
| 13786    | 87       |            |       |      |          |           |
| 13787    | 87       |            |       |      |          |           |
| 13788    | 87       |            |       |      |          |           |
| 13789    | 87       |            |       |      |          |           |
| 13790    | 87       |            |       |      |          |           |
| 13791    | 87       |            |       |      |          |           |
| 13792    | 87       |            |       |      |          |           |

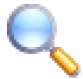

| Ereignis | Aufnahme | DAPI/CK-PE | CK-PE | DAPI | CD45-APC | HER-2/neu |
|----------|----------|------------|-------|------|----------|-----------|
| 13793    | 87       |            |       |      |          |           |
| 13794    | 87       |            |       |      |          |           |
| 13795    | 87       |            |       |      |          |           |
| 13796    | 87       |            |       |      |          |           |
| 13797    | 87       |            |       |      |          |           |
| 13798    | 87       |            |       |      |          |           |
| 13799    | 87       |            |       |      |          |           |
| 13800    | 87       |            |       |      |          |           |
| 13801    | 87       |            |       |      |          |           |
| 13802    | 87       |            |       |      |          |           |
| 13803    | 87       |            |       |      |          |           |
| 13804    | 87       |            |       |      |          |           |

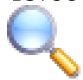

| Ereignis | Aufnahme | DAPI/CK-PE                                                                          | CK-PE                                                                               | DAPI                                                                                 | CD45-APC                                                                              | HER-2/neu                                                                             |
|----------|----------|-------------------------------------------------------------------------------------|-------------------------------------------------------------------------------------|--------------------------------------------------------------------------------------|---------------------------------------------------------------------------------------|---------------------------------------------------------------------------------------|
| 13805    | 87       | 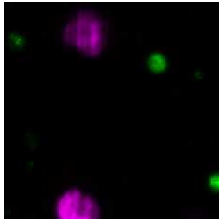   |    |    |    |    |
| 13806    | 87       |    |    |    |    |    |
| 13807    | 87       |    |    |    |    |    |
| 13808    | 87       |    |    |    |    |    |
| 13809    | 87       |    |    |    |    |    |
| 13810    | 87       |   |   |   |   |   |
| 13811    | 87       |  |  |  |  |  |
| 13812    | 87       |  |  |  |  |  |
| 13813    | 87       |  |  |  |  |  |
| 13814    | 87       |  |  |  |  |  |
| 13815    | 87       |  |  |  |  |  |

| Ereignis | Aufnahme | DAPI/CK-PE | CK-PE | DAPI | CD45-APC | HER-2/neu |
|----------|----------|------------|-------|------|----------|-----------|
| 13816    | 87       |            |       |      |          |           |
| 13817    | 87       |            |       |      |          |           |
| 13818    | 87       |            |       |      |          |           |
| 13819    | 87       |            |       |      |          |           |
| 13820    | 87       |            |       |      |          |           |
| 13821    | 87       |            |       |      |          |           |
| 13822    | 87       |            |       |      |          |           |
| 13823    | 87       |            |       |      |          |           |
| 13824    | 87       |            |       |      |          |           |
| 13825    | 87       |            |       |      |          |           |
| 13826    | 87       |            |       |      |          |           |
| 13827    | 87       |            |       |      |          |           |

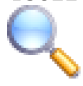



| Ereignis | Aufnahme | DAPI/CK-PE | CK-PE | DAPI | CD45-APC | HER-2/neu |
|----------|----------|------------|-------|------|----------|-----------|
| 13828    | 87       |            |       |      |          |           |
| 13829    | 87       |            |       |      |          |           |
| 13830    | 87       |            |       |      |          |           |
| 13831    | 87       |            |       |      |          |           |
| 13832    | 87       |            |       |      |          |           |
| 13833    | 87       |            |       |      |          |           |
| 13834    | 87       |            |       |      |          |           |
| 13835    | 87       |            |       |      |          |           |
| 13836    | 87       |            |       |      |          |           |
| 13837    | 87       |            |       |      |          |           |
| 13838    | 87       |            |       |      |          |           |
| 13839    | 87       |            |       |      |          |           |

| Ereignis | Aufnahme | DAPI/CK-PE | CK-PE | DAPI | CD45-APC | HER-2/neu |
|----------|----------|------------|-------|------|----------|-----------|
| 13840    | 87       |            |       |      |          |           |
| 13841    | 87       |            |       |      |          |           |
| 13842    | 87       |            |       |      |          |           |
| 13843    | 87       |            |       |      |          |           |
| 13844    | 87       |            |       |      |          |           |
| 13845    | 87       |            |       |      |          |           |
| 13846    | 87       |            |       |      |          |           |
| 13847    | 87       |            |       |      |          |           |
| 13848    | 87       |            |       |      |          |           |
| 13849    | 87       |            |       |      |          |           |
| 13850    | 87       |            |       |      |          |           |
| 13851    | 87       |            |       |      |          |           |

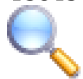

| Ereignis | Aufnahme | DAPI/CK-PE | CK-PE | DAPI | CD45-APC | HER-2/neu |
|----------|----------|------------|-------|------|----------|-----------|
| 13852    | 87       |            |       |      |          |           |
|          |          |            |       |      |          |           |
| 13853    | 87       |            |       |      |          |           |
|          |          |            |       |      |          |           |
| 13854    | 87       |            |       |      |          |           |
|          |          |            |       |      |          |           |
| 13855    | 87       |            |       |      |          |           |
|          |          |            |       |      |          |           |
| 13856    | 87       |            |       |      |          |           |
|          |          |            |       |      |          |           |
| 13857    | 87       |            |       |      |          |           |
|          |          |            |       |      |          |           |
| 13858    | 87       |            |       |      |          |           |
|          |          |            |       |      |          |           |
| 13859    | 87       |            |       |      |          |           |
|          |          |            |       |      |          |           |
| 13860    | 87       |            |       |      |          |           |
|          |          |            |       |      |          |           |
| 13861    | 87       |            |       |      |          |           |
|          |          |            |       |      |          |           |
| 13862    | 87       |            |       |      |          |           |
|          |          |            |       |      |          |           |

| Ereignis | Aufnahme | DAPI/CK-PE | CK-PE | DAPI | CD45-APC | HER-2/neu |
|----------|----------|------------|-------|------|----------|-----------|
| 13863    | 87       |            |       |      |          |           |
| 13864    | 87       |            |       |      |          |           |
| 13865    | 87       |            |       |      |          |           |
| 13866    | 87       |            |       |      |          |           |
| 13867    | 87       |            |       |      |          |           |
| 13868    | 87       |            |       |      |          |           |
| 13869    | 87       |            |       |      |          |           |
| 13870    | 87       |            |       |      |          |           |
| 13871    | 87       |            |       |      |          |           |
| 13872    | 87       |            |       |      |          |           |
| 13873    | 87       |            |       |      |          |           |
| 13874    | 87       |            |       |      |          |           |

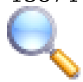

| Ereignis | Aufnahme | DAPI/CK-PE | CK-PE | DAPI | CD45-APC | HER-2/neu |
|----------|----------|------------|-------|------|----------|-----------|
| 13875    | 87       |            |       |      |          |           |
| 13876    | 87       |            |       |      |          |           |
| 13877    | 87       |            |       |      |          |           |
| 13878    | 87       |            |       |      |          |           |
| 13879    | 87       |            |       |      |          |           |
| 13880    | 87       |            |       |      |          |           |
| 13881    | 87       |            |       |      |          |           |
| 13882    | 86       |            |       |      |          |           |
| 13883    | 87       |            |       |      |          |           |
| 13884    | 54       |            |       |      |          |           |
| 13885    | 86       |            |       |      |          |           |



| Ereignis | Aufnahme | DAPI/CK-PE | CK-PE | DAPI | CD45-APC | HER-2/neu |
|----------|----------|------------|-------|------|----------|-----------|
| 13886    | 54       |            |       |      |          |           |
| 13887    | 54       |            |       |      |          |           |
| 13888    | 88       |            |       |      |          |           |
| 13889    | 88       |            |       |      |          |           |
| 13890    | 88       |            |       |      |          |           |
| 13891    | 88       |            |       |      |          |           |
| 13892    | 88       |            |       |      |          |           |
| 13893    | 88       |            |       |      |          |           |
| 13894    | 88       |            |       |      |          |           |
| 13895    | 88       |            |       |      |          |           |
| 13896    | 88       |            |       |      |          |           |

| Ereignis | Aufnahme | DAPI/CK-PE | CK-PE | DAPI | CD45-APC | HER-2/neu |
|----------|----------|------------|-------|------|----------|-----------|
| 13897    | 88       |            |       |      |          |           |
| 13898    | 88       |            |       |      |          |           |
| 13899    | 88       |            |       |      |          |           |
| 13900    | 88       |            |       |      |          |           |
| 13901    | 88       |            |       |      |          |           |
| 13902    | 88       |            |       |      |          |           |
| 13903    | 88       |            |       |      |          |           |
| 13904    | 88       |            |       |      |          |           |
| 13905    | 88       |            |       |      |          |           |
| 13906    | 88       |            |       |      |          |           |
| 13907    | 88       |            |       |      |          |           |

| Ereignis | Aufnahme | DAPI/CK-PE | CK-PE | DAPI | CD45-APC | HER-2/neu |
|----------|----------|------------|-------|------|----------|-----------|
| 13908    | 88       |            |       |      |          |           |
| 13909    | 88       |            |       |      |          |           |
| 13910    | 88       |            |       |      |          |           |
| 13911    | 88       |            |       |      |          |           |
| 13912    | 88       |            |       |      |          |           |
| 13913    | 88       |            |       |      |          |           |
| 13914    | 88       |            |       |      |          |           |
| 13915    | 88       |            |       |      |          |           |
| 13916    | 88       |            |       |      |          |           |
| 13917    | 88       |            |       |      |          |           |
| 13918    | 88       |            |       |      |          |           |
| 13919    | 88       |            |       |      |          |           |

| Ereignis                                                                                  | Aufnahme | DAPI/CK-PE | CK-PE | DAPI | CD45-APC | HER-2/neu |
|-------------------------------------------------------------------------------------------|----------|------------|-------|------|----------|-----------|
| 13920                                                                                     | 88       |            |       |      |          |           |
| 13921                                                                                     | 88       |            |       |      |          |           |
| 13922                                                                                     | 88       |            |       |      |          |           |
| 13923                                                                                     | 88       |            |       |      |          |           |
| 13924                                                                                     | 88       |            |       |      |          |           |
| 13925                                                                                     | 88       |            |       |      |          |           |
| 13926                                                                                     | 88       |            |       |      |          |           |
| 13927                                                                                     | 88       |            |       |      |          |           |
|  13928 | 88       |            |       |      |          |           |
| 13929                                                                                     | 88       |            |       |      |          |           |
| 13930                                                                                     | 88       |            |       |      |          |           |
|  13931 | 88       |            |       |      |          |           |

| Ereignis                                                                                  | Aufnahme | DAPI/CK-PE | CK-PE | DAPI | CD45-APC | HER-2/neu |
|-------------------------------------------------------------------------------------------|----------|------------|-------|------|----------|-----------|
| 13932                                                                                     | 88       |            |       |      |          |           |
| 13933                                                                                     | 88       |            |       |      |          |           |
| 13934                                                                                     | 88       |            |       |      |          |           |
| 13935                                                                                     | 88       |            |       |      |          |           |
| 13936                                                                                     | 88       |            |       |      |          |           |
| 13937                                                                                     | 88       |            |       |      |          |           |
|  13938 | 88       |            |       |      |          |           |
| 13939                                                                                     | 88       |            |       |      |          |           |
| 13940                                                                                     | 88       |            |       |      |          |           |
| 13941                                                                                     | 88       |            |       |      |          |           |
| 13942                                                                                     | 88       |            |       |      |          |           |
| 13943                                                                                     | 88       |            |       |      |          |           |
| 13944                                                                                     | 88       |            |       |      |          |           |



| Ereignis | Aufnahme | DAPI/CK-PE | CK-PE | DAPI | CD45-APC | HER-2/neu |
|----------|----------|------------|-------|------|----------|-----------|
| 13945    | 88       |            |       |      |          |           |
| 13946    | 88       |            |       |      |          |           |
| 13947    | 88       |            |       |      |          |           |
| 13948    | 88       |            |       |      |          |           |
| 13949    | 88       |            |       |      |          |           |
| 13950    | 88       |            |       |      |          |           |
| 13951    | 88       |            |       |      |          |           |
| 13952    | 88       |            |       |      |          |           |
| 13953    | 88       |            |       |      |          |           |
| 13954    | 88       |            |       |      |          |           |
| 13955    | 88       |            |       |      |          |           |

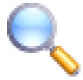

| Ereignis | Aufnahme | DAPI/CK-PE                                                                          | CK-PE                                                                               | DAPI                                                                                 | CD45-APC                                                                              | HER-2/neu                                                                             |
|----------|----------|-------------------------------------------------------------------------------------|-------------------------------------------------------------------------------------|--------------------------------------------------------------------------------------|---------------------------------------------------------------------------------------|---------------------------------------------------------------------------------------|
| 13956    | 88       | 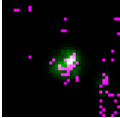   |    |    |    |    |
| 13957    | 88       |    |    |    |    |    |
| 13958    | 88       |    |    |    |    |    |
| 13959    | 88       |    |    |    |    |    |
| 13960    | 88       |   |   |   |   |   |
| 13961    | 88       |  |  |  |  |  |
| 13962    | 88       |  |  |  |  |  |
| 13963    | 88       |  |  |  |  |  |
| 13964    | 88       |  |  |  |  |  |
| 13965    | 88       |  |  |  |  |  |
| 13966    | 88       |  |  |  |  |  |

| Ereignis | Aufnahme | DAPI/CK-PE | CK-PE | DAPI | CD45-APC | HER-2/neu |
|----------|----------|------------|-------|------|----------|-----------|
| 13967    | 88       |            |       |      |          |           |
| 13968    | 88       |            |       |      |          |           |
| 13969    | 88       |            |       |      |          |           |
| 13970    | 88       |            |       |      |          |           |
| 13971    | 88       |            |       |      |          |           |
| 13972    | 88       |            |       |      |          |           |
| 13973    | 88       |            |       |      |          |           |
| 13974    | 88       |            |       |      |          |           |
| 13975    | 88       |            |       |      |          |           |
| 13976    | 88       |            |       |      |          |           |
| 13977    | 88       |            |       |      |          |           |
| 13978    | 88       |            |       |      |          |           |
| 13979    | 88       |            |       |      |          |           |

| Ereignis | Aufnahme | DAPI/CK-PE | CK-PE | DAPI | CD45-APC | HER-2/neu |
|----------|----------|------------|-------|------|----------|-----------|
| 13980    | 88       |            |       |      |          |           |
| 13981    | 88       |            |       |      |          |           |
| 13982    | 88       |            |       |      |          |           |
| 13983    | 88       |            |       |      |          |           |
| 13984    | 88       |            |       |      |          |           |
| 13985    | 88       |            |       |      |          |           |
| 13986    | 88       |            |       |      |          |           |
| 13987    | 88       |            |       |      |          |           |
| 13988    | 88       |            |       |      |          |           |
| 13989    | 88       |            |       |      |          |           |

| Ereignis | Aufnahme | DAPI/CK-PE | CK-PE | DAPI | CD45-APC | HER-2/neu |
|----------|----------|------------|-------|------|----------|-----------|
| 13990    | 88       |            |       |      |          |           |
| 13991    | 88       |            |       |      |          |           |
| 13992    | 88       |            |       |      |          |           |
| 13993    | 88       |            |       |      |          |           |
| 13994    | 88       |            |       |      |          |           |
| 13995    | 88       |            |       |      |          |           |
| 13996    | 88       |            |       |      |          |           |
| 13997    | 88       |            |       |      |          |           |
| 13998    | 88       |            |       |      |          |           |
| 13999    | 88       |            |       |      |          |           |
| 14000    | 88       |            |       |      |          |           |



Proben-ID: Gyn14.208

Kassetten-ID: 01327106

Patienten-ID:

| Ereignis | Aufnahme | DAPI/CK-PE                                                                          | CK-PE                                                                               | DAPI                                                                                 | CD45-APC                                                                              | HER-2/neu                                                                             |
|----------|----------|-------------------------------------------------------------------------------------|-------------------------------------------------------------------------------------|--------------------------------------------------------------------------------------|---------------------------------------------------------------------------------------|---------------------------------------------------------------------------------------|
| 24001    | 135      | 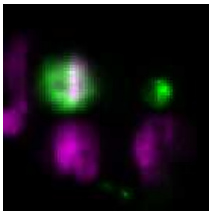   |    |    |    |    |
| 24002    | 136      |    |    |    |    |    |
| 24003    | 75       |    |    |    |    |    |
| 24004    | 136      |   |   |   |   |   |
| 24005    | 137      |  |  |  |  |  |
| 24006    | 137      |  |  |  |  |  |
| 24007    | 137      |  |  |  |  |  |
| 24008    | 137      |  |  |  |  |  |
| 24009    | 137      |  |  |  |  |  |

| Ereignis | Aufnahme | DAPI/CK-PE | CK-PE | DAPI | CD45-APC | HER-2/neu |
|----------|----------|------------|-------|------|----------|-----------|
| 24010    | 137      |            |       |      |          |           |
| 24011    | 137      |            |       |      |          |           |
| 24012    | 137      |            |       |      |          |           |
| 24013    | 137      |            |       |      |          |           |
| 24014    | 137      |            |       |      |          |           |
| 24015    | 137      |            |       |      |          |           |
| 24016    | 137      |            |       |      |          |           |
| 24017    | 137      |            |       |      |          |           |
| 24018    | 137      |            |       |      |          |           |
| 24019    | 137      |            |       |      |          |           |
| 24020    | 137      |            |       |      |          |           |
| 24021    | 137      |            |       |      |          |           |
| 24022    | 137      |            |       |      |          |           |

| Ereignis                                                                                  | Aufnahme | DAPI/CK-PE | CK-PE | DAPI | CD45-APC | HER-2/neu |
|-------------------------------------------------------------------------------------------|----------|------------|-------|------|----------|-----------|
| 24023                                                                                     | 137      |            |       |      |          |           |
| 24024                                                                                     | 137      |            |       |      |          |           |
| 24025                                                                                     | 137      |            |       |      |          |           |
| 24026                                                                                     | 137      |            |       |      |          |           |
| 24027                                                                                     | 137      |            |       |      |          |           |
| 24028                                                                                     | 137      |            |       |      |          |           |
|  24029 | 137      |            |       |      |          |           |
| 24030                                                                                     | 137      |            |       |      |          |           |
| 24031                                                                                     | 137      |            |       |      |          |           |
|  24032 | 137      |            |       |      |          |           |
| 24033                                                                                     | 137      |            |       |      |          |           |
| 24034                                                                                     | 137      |            |       |      |          |           |

| Ereignis | Aufnahme | DAPI/CK-PE | CK-PE | DAPI | CD45-APC | HER-2/neu |
|----------|----------|------------|-------|------|----------|-----------|
| 24035    | 137      |            |       |      |          |           |
| 24036    | 137      |            |       |      |          |           |
| 24037    | 137      |            |       |      |          |           |
| 24038    | 137      |            |       |      |          |           |
| 24039    | 137      |            |       |      |          |           |
| 24040    | 137      |            |       |      |          |           |
| 24041    | 137      |            |       |      |          |           |
| 24042    | 137      |            |       |      |          |           |
| 24043    | 137      |            |       |      |          |           |
| 24044    | 137      |            |       |      |          |           |
| 24045    | 137      |            |       |      |          |           |



| Ereignis | Aufnahme | DAPI/CK-PE | CK-PE | DAPI | CD45-APC | HER-2/neu |
|----------|----------|------------|-------|------|----------|-----------|
| 24046    | 137      |            |       |      |          |           |
| 24047    | 137      |            |       |      |          |           |
| 24048    | 137      |            |       |      |          |           |
| 24049    | 137      |            |       |      |          |           |
| 24050    | 137      |            |       |      |          |           |
| 24051    | 137      |            |       |      |          |           |
| 24052    | 137      |            |       |      |          |           |
| 24053    | 137      |            |       |      |          |           |
| 24054    | 137      |            |       |      |          |           |
| 24055    | 137      |            |       |      |          |           |
| 24056    | 137      |            |       |      |          |           |



| Ereignis | Aufnahme | DAPI/CK-PE | CK-PE | DAPI | CD45-APC | HER-2/neu |
|----------|----------|------------|-------|------|----------|-----------|
| 24057    | 137      |            |       |      |          |           |
| 24058    | 137      |            |       |      |          |           |
| 24059    | 137      |            |       |      |          |           |
| 24060    | 137      |            |       |      |          |           |
| 24061    | 137      |            |       |      |          |           |
| 24062    | 137      |            |       |      |          |           |
| 24063    | 137      |            |       |      |          |           |
| 24064    | 137      |            |       |      |          |           |
| 24065    | 137      |            |       |      |          |           |
| 24066    | 137      |            |       |      |          |           |
| 24067    | 137      |            |       |      |          |           |
| 24068    | 137      |            |       |      |          |           |

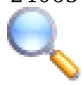

| Ereignis                                                                                  | Aufnahme | DAPI/CK-PE | CK-PE | DAPI | CD45-APC | HER-2/neu |
|-------------------------------------------------------------------------------------------|----------|------------|-------|------|----------|-----------|
| 24069                                                                                     | 137      |            |       |      |          |           |
| 24070                                                                                     | 137      |            |       |      |          |           |
| 24071                                                                                     | 137      |            |       |      |          |           |
| 24072                                                                                     | 137      |            |       |      |          |           |
| 24073                                                                                     | 137      |            |       |      |          |           |
| 24074                                                                                     | 137      |            |       |      |          |           |
| 24075                                                                                     | 137      |            |       |      |          |           |
| 24076                                                                                     | 137      |            |       |      |          |           |
| 24077                                                                                     | 137      |            |       |      |          |           |
| 24078                                                                                     | 137      |            |       |      |          |           |
| 24079                                                                                     | 137      |            |       |      |          |           |
| 24080                                                                                     | 137      |            |       |      |          |           |
|  24081 | 137      |            |       |      |          |           |

| Ereignis | Aufnahme | DAPI/CK-PE | CK-PE | DAPI | CD45-APC | HER-2/neu |
|----------|----------|------------|-------|------|----------|-----------|
| 24082    | 137      |            |       |      |          |           |
| 24083    | 137      |            |       |      |          |           |
| 24084    | 137      |            |       |      |          |           |
| 24085    | 137      |            |       |      |          |           |
| 24086    | 137      |            |       |      |          |           |
| 24087    | 137      |            |       |      |          |           |
| 24088    | 137      |            |       |      |          |           |
| 24089    | 137      |            |       |      |          |           |
| 24090    | 137      |            |       |      |          |           |
| 24091    | 137      |            |       |      |          |           |
| 24092    | 137      |            |       |      |          |           |

| Ereignis | Aufnahme | DAPI/CK-PE                                                                          | CK-PE                                                                               | DAPI                                                                                 | CD45-APC                                                                              | HER-2/neu                                                                             |
|----------|----------|-------------------------------------------------------------------------------------|-------------------------------------------------------------------------------------|--------------------------------------------------------------------------------------|---------------------------------------------------------------------------------------|---------------------------------------------------------------------------------------|
| 24093    | 137      | 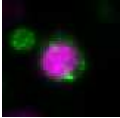   |    |    |    |    |
| 24094    | 137      |    |    |    |    |    |
| 24095    | 137      |    |    |    |    |    |
| 24096    | 137      |    |    |    |    |    |
| 24097    | 137      |   |   |   |   |   |
| 24098    | 137      |  |  |  |  |  |
| 24099    | 137      |  |  |  |  |  |
| 24100    | 137      |  |  |  |  |  |
| 24101    | 137      |  |  |  |  |  |
| 24102    | 137      |  |  |  |  |  |
| 24103    | 137      |  |  |  |  |  |



| Ereignis | Aufnahme | DAPI/CK-PE | CK-PE | DAPI | CD45-APC | HER-2/neu |
|----------|----------|------------|-------|------|----------|-----------|
| 24104    | 137      |            |       |      |          |           |
| 24105    | 137      |            |       |      |          |           |
| 24106    | 137      |            |       |      |          |           |
| 24107    | 137      |            |       |      |          |           |
| 24108    | 137      |            |       |      |          |           |
| 24109    | 137      |            |       |      |          |           |
| 24110    | 137      |            |       |      |          |           |
| 24111    | 137      |            |       |      |          |           |
| 24112    | 137      |            |       |      |          |           |
| 24113    | 137      |            |       |      |          |           |
| 24114    | 137      |            |       |      |          |           |
| 24115    | 137      |            |       |      |          |           |
| 24116    | 137      |            |       |      |          |           |



| Ereignis | Aufnahme | DAPI/CK-PE | CK-PE | DAPI | CD45-APC | HER-2/neu |
|----------|----------|------------|-------|------|----------|-----------|
| 24117    | 137      |            |       |      |          |           |
| 24118    | 137      |            |       |      |          |           |
| 24119    | 137      |            |       |      |          |           |
| 24120    | 137      |            |       |      |          |           |
| 24121    | 137      |            |       |      |          |           |
| 24122    | 137      |            |       |      |          |           |
| 24123    | 137      |            |       |      |          |           |
| 24124    | 137      |            |       |      |          |           |
| 24125    | 137      |            |       |      |          |           |
| 24126    | 137      |            |       |      |          |           |
| 24127    | 137      |            |       |      |          |           |
| 24128    | 137      |            |       |      |          |           |
| 24129    | 137      |            |       |      |          |           |

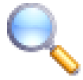

| Ereignis | Aufnahme | DAPI/CK-PE | CK-PE | DAPI | CD45-APC | HER-2/neu |
|----------|----------|------------|-------|------|----------|-----------|
| 24130    | 137      |            |       |      |          |           |
| 24131    | 137      |            |       |      |          |           |
| 24132    | 137      |            |       |      |          |           |
| 24133    | 137      |            |       |      |          |           |
| 24134    | 137      |            |       |      |          |           |
| 24135    | 137      |            |       |      |          |           |
| 24136    | 137      |            |       |      |          |           |
| 24137    | 137      |            |       |      |          |           |
| 24138    | 137      |            |       |      |          |           |
| 24139    | 137      |            |       |      |          |           |
| 24140    | 137      |            |       |      |          |           |
| 24141    | 137      |            |       |      |          |           |
| 24142    | 137      |            |       |      |          |           |

| Ereignis                                                                                  | Aufnahme | DAPI/CK-PE | CK-PE | DAPI | CD45-APC | HER-2/neu |
|-------------------------------------------------------------------------------------------|----------|------------|-------|------|----------|-----------|
| 24143                                                                                     | 137      |            |       |      |          |           |
| 24144                                                                                     | 137      |            |       |      |          |           |
| 24145                                                                                     | 137      |            |       |      |          |           |
| 24146                                                                                     | 137      |            |       |      |          |           |
| 24147                                                                                     | 137      |            |       |      |          |           |
| 24148                                                                                     | 137      |            |       |      |          |           |
|  24149 | 137      |            |       |      |          |           |
| 24150                                                                                     | 137      |            |       |      |          |           |
| 24151                                                                                     | 137      |            |       |      |          |           |
| 24152                                                                                     | 137      |            |       |      |          |           |
| 24153                                                                                     | 137      |            |       |      |          |           |
| 24154                                                                                     | 137      |            |       |      |          |           |
| 24155                                                                                     | 137      |            |       |      |          |           |

| Ereignis                                                                                  | Aufnahme | DAPI/CK-PE | CK-PE | DAPI | CD45-APC | HER-2/neu |
|-------------------------------------------------------------------------------------------|----------|------------|-------|------|----------|-----------|
| 24156                                                                                     | 137      |            |       |      |          |           |
| 24157                                                                                     | 137      |            |       |      |          |           |
| 24158                                                                                     | 137      |            |       |      |          |           |
| 24159                                                                                     | 137      |            |       |      |          |           |
| 24160                                                                                     | 137      |            |       |      |          |           |
| 24161                                                                                     | 137      |            |       |      |          |           |
| 24162                                                                                     | 137      |            |       |      |          |           |
| 24163                                                                                     | 137      |            |       |      |          |           |
| 24164                                                                                     | 137      |            |       |      |          |           |
| 24165                                                                                     | 137      |            |       |      |          |           |
| 24166                                                                                     | 137      |            |       |      |          |           |
|  24167 | 137      |            |       |      |          |           |



| Ereignis | Aufnahme | DAPI/CK-PE | CK-PE | DAPI | CD45-APC | HER-2/neu |
|----------|----------|------------|-------|------|----------|-----------|
| 24168    | 137      |            |       |      |          |           |
| 24169    | 137      |            |       |      |          |           |
| 24170    | 137      |            |       |      |          |           |
| 24171    | 137      |            |       |      |          |           |
| 24172    | 137      |            |       |      |          |           |
| 24173    | 137      |            |       |      |          |           |
| 24174    | 137      |            |       |      |          |           |
| 24175    | 137      |            |       |      |          |           |
| 24176    | 137      |            |       |      |          |           |
| 24177    | 137      |            |       |      |          |           |
| 24178    | 137      |            |       |      |          |           |
| 24179    | 137      |            |       |      |          |           |
| 24180    | 137      |            |       |      |          |           |



| Ereignis | Aufnahme | DAPI/CK-PE | CK-PE | DAPI | CD45-APC | HER-2/neu |
|----------|----------|------------|-------|------|----------|-----------|
| 24181    | 137      |            |       |      |          |           |
| 24182    | 137      |            |       |      |          |           |
| 24183    | 137      |            |       |      |          |           |
| 24184    | 137      |            |       |      |          |           |
| 24185    | 137      |            |       |      |          |           |
| 24186    | 137      |            |       |      |          |           |
| 24187    | 137      |            |       |      |          |           |
| 24188    | 137      |            |       |      |          |           |
| 24189    | 137      |            |       |      |          |           |
| 24190    | 137      |            |       |      |          |           |
| 24191    | 137      |            |       |      |          |           |

| Ereignis | Aufnahme | DAPI/CK-PE | CK-PE | DAPI | CD45-APC | HER-2/neu |
|----------|----------|------------|-------|------|----------|-----------|
| 24192    | 137      |            |       |      |          |           |
| 24193    | 137      |            |       |      |          |           |
| 24194    | 137      |            |       |      |          |           |
| 24195    | 137      |            |       |      |          |           |
| 24196    | 137      |            |       |      |          |           |
| 24197    | 137      |            |       |      |          |           |
| 24198    | 137      |            |       |      |          |           |
| 24199    | 137      |            |       |      |          |           |
| 24200    | 137      |            |       |      |          |           |
| 24201    | 137      |            |       |      |          |           |
| 24202    | 137      |            |       |      |          |           |

| Ereignis | Aufnahme | DAPI/CK-PE                                                                          | CK-PE                                                                               | DAPI                                                                                 | CD45-APC                                                                              | HER-2/neu                                                                             |
|----------|----------|-------------------------------------------------------------------------------------|-------------------------------------------------------------------------------------|--------------------------------------------------------------------------------------|---------------------------------------------------------------------------------------|---------------------------------------------------------------------------------------|
| 24203    | 137      | 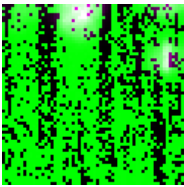   |    |    |    |    |
| 24204    | 137      |    |    |    |    |    |
| 24205    | 137      |    |    |    |    |    |
| 24206    | 137      |    |    |    |    |    |
| 24207    | 137      |    |    |    |    |    |
| 24208    | 137      |   |   |   |   |   |
| 24209    | 137      |  |  |  |  |  |
| 24210    | 137      |  |  |  |  |  |
| 24211    | 137      |  |  |  |  |  |
| 24212    | 137      |  |  |  |  |  |
| 24213    | 137      |  |  |  |  |  |
| 24214    | 137      |  |  |  |  |  |

| Ereignis | Aufnahme | DAPI/CK-PE | CK-PE | DAPI | CD45-APC | HER-2/neu |
|----------|----------|------------|-------|------|----------|-----------|
| 24215    | 137      |            |       |      |          |           |
| 24216    | 137      |            |       |      |          |           |
| 24217    | 137      |            |       |      |          |           |
| 24218    | 137      |            |       |      |          |           |
| 24219    | 137      |            |       |      |          |           |
| 24220    | 137      |            |       |      |          |           |
| 24221    | 137      |            |       |      |          |           |
| 24222    | 137      |            |       |      |          |           |
| 24223    | 137      |            |       |      |          |           |
| 24224    | 137      |            |       |      |          |           |
| 24225    | 137      |            |       |      |          |           |



| Ereignis | Aufnahme | DAPI/CK-PE                                                                          | CK-PE                                                                               | DAPI                                                                                 | CD45-APC                                                                              | HER-2/neu                                                                             |
|----------|----------|-------------------------------------------------------------------------------------|-------------------------------------------------------------------------------------|--------------------------------------------------------------------------------------|---------------------------------------------------------------------------------------|---------------------------------------------------------------------------------------|
| 24226    | 137      | 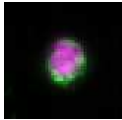   |    |    |    |    |
| 24227    | 137      |    |    |    |    |    |
| 24228    | 137      |    |    |    |    |    |
| 24229    | 137      |    |    |    |    |    |
| 24230    | 137      |    |    |    |    |    |
| 24231    | 137      |   |   |   |   |   |
| 24232    | 137      |  |  |  |  |  |
| 24233    | 137      |  |  |  |  |  |
| 24234    | 137      |  |  |  |  |  |
| 24235    | 137      |  |  |  |  |  |
| 24236    | 137      |  |  |  |  |  |
| 24237    | 137      |  |  |  |  |  |



| Ereignis | Aufnahme | DAPI/CK-PE | CK-PE | DAPI | CD45-APC | HER-2/neu |
|----------|----------|------------|-------|------|----------|-----------|
| 24238    | 136      |            |       |      |          |           |
| 24239    | 137      |            |       |      |          |           |
| 24240    | 137      |            |       |      |          |           |
| 24241    | 74       |            |       |      |          |           |
| 24242    | 137      |            |       |      |          |           |
| 24243    | 136      |            |       |      |          |           |
| 24244    | 136      |            |       |      |          |           |
| 24245    | 137      |            |       |      |          |           |
| 24246    | 74       |            |       |      |          |           |
| 24247    | 137      |            |       |      |          |           |
| 24248    | 74       |            |       |      |          |           |
| 24249    | 137      |            |       |      |          |           |

| Ereignis | Aufnahme | DAPI/CK-PE | CK-PE | DAPI | CD45-APC | HER-2/neu |
|----------|----------|------------|-------|------|----------|-----------|
| 24250    | 74       |            |       |      |          |           |
| 24251    | 74       |            |       |      |          |           |
| 24252    | 138      |            |       |      |          |           |
| 24253    | 138      |            |       |      |          |           |
| 24254    | 138      |            |       |      |          |           |
| 24255    | 138      |            |       |      |          |           |
| 24256    | 138      |            |       |      |          |           |
| 24257    | 138      |            |       |      |          |           |
| 24258    | 138      |            |       |      |          |           |
| 24259    | 138      |            |       |      |          |           |
| 24260    | 138      |            |       |      |          |           |
| 24261    | 138      |            |       |      |          |           |

| Ereignis | Aufnahme | DAPI/CK-PE                                                                          | CK-PE                                                                               | DAPI                                                                                 | CD45-APC                                                                              | HER-2/neu                                                                             |
|----------|----------|-------------------------------------------------------------------------------------|-------------------------------------------------------------------------------------|--------------------------------------------------------------------------------------|---------------------------------------------------------------------------------------|---------------------------------------------------------------------------------------|
| 24262    | 138      | 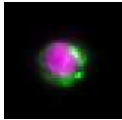   |    |    |    |    |
| 24263    | 138      |    |    |    |    |    |
| 24264    | 138      |    |    |    |    |    |
| 24265    | 138      |    |    |    |    |    |
| 24266    | 138      |    |    |    |    |    |
| 24267    | 138      |    |    |    |    |    |
| 24268    | 138      |   |   |   |   |   |
| 24269    | 138      |  |  |  |  |  |
| 24270    | 138      |  |  |  |  |  |
| 24271    | 138      |  |  |  |  |  |
| 24272    | 138      |  |  |  |  |  |
| 24273    | 138      |  |  |  |  |  |
| 24274    | 138      |  |  |  |  |  |
| 24275    | 138      |  |  |  |  |  |

| Ereignis | Aufnahme | DAPI/CK-PE                                                                          | CK-PE                                                                               | DAPI                                                                                 | CD45-APC                                                                              | HER-2/neu                                                                             |
|----------|----------|-------------------------------------------------------------------------------------|-------------------------------------------------------------------------------------|--------------------------------------------------------------------------------------|---------------------------------------------------------------------------------------|---------------------------------------------------------------------------------------|
| 24276    | 138      | 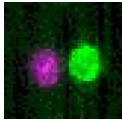   |    |    |    |    |
| 24277    | 138      |    |    |    |    |    |
| 24278    | 138      |    |    |    |    |    |
| 24279    | 138      |    |    |    |    |    |
| 24280    | 138      |    |    |    |    |    |
| 24281    | 138      |    |    |    |    |    |
| 24282    | 138      |   |   |   |   |   |
| 24283    | 138      |  |  |  |  |  |
| 24284    | 138      |  |  |  |  |  |
| 24285    | 138      |  |  |  |  |  |
| 24286    | 138      |  |  |  |  |  |
| 24287    | 138      |  |  |  |  |  |
| 24288    | 138      |  |  |  |  |  |





| Ereignis | Aufnahme | DAPI/CK-PE | CK-PE | DAPI | CD45-APC | HER-2/neu |
|----------|----------|------------|-------|------|----------|-----------|
| 24289    | 138      |            |       |      |          |           |
| 24290    | 138      |            |       |      |          |           |
| 24291    | 138      |            |       |      |          |           |
| 24292    | 138      |            |       |      |          |           |
| 24293    | 138      |            |       |      |          |           |
| 24294    | 138      |            |       |      |          |           |
| 24295    | 138      |            |       |      |          |           |
| 24296    | 138      |            |       |      |          |           |
| 24297    | 138      |            |       |      |          |           |
| 24298    | 138      |            |       |      |          |           |
| 24299    | 138      |            |       |      |          |           |
| 24300    | 138      |            |       |      |          |           |
| 24301    | 138      |            |       |      |          |           |



| Ereignis | Aufnahme | DAPI/CK-PE | CK-PE | DAPI | CD45-APC | HER-2/neu |
|----------|----------|------------|-------|------|----------|-----------|
| 24302    | 138      |            |       |      |          |           |
|          |          |            |       |      |          |           |
| 24303    | 138      |            |       |      |          |           |
| 24304    | 138      |            |       |      |          |           |
| 24305    | 138      |            |       |      |          |           |
| 24306    | 138      |            |       |      |          |           |
| 24307    | 138      |            |       |      |          |           |
| 24308    | 138      |            |       |      |          |           |
| 24309    | 138      |            |       |      |          |           |
| 24310    | 138      |            |       |      |          |           |
| 24311    | 138      |            |       |      |          |           |
| 24312    | 138      |            |       |      |          |           |
| 24313    | 138      |            |       |      |          |           |

| Ereignis | Aufnahme | DAPI/CK-PE | CK-PE | DAPI | CD45-APC | HER-2/neu |
|----------|----------|------------|-------|------|----------|-----------|
| 24314    | 138      |            |       |      |          |           |
| 24315    | 138      |            |       |      |          |           |
| 24316    | 138      |            |       |      |          |           |
| 24317    | 138      |            |       |      |          |           |
| 24318    | 138      |            |       |      |          |           |
| 24319    | 138      |            |       |      |          |           |
| 24320    | 138      |            |       |      |          |           |
| 24321    | 138      |            |       |      |          |           |
| 24322    | 138      |            |       |      |          |           |
| 24323    | 138      |            |       |      |          |           |
| 24324    | 138      |            |       |      |          |           |
| 24325    | 138      |            |       |      |          |           |
| 24326    | 138      |            |       |      |          |           |

| Ereignis | Aufnahme | DAPI/CK-PE | CK-PE | DAPI | CD45-APC | HER-2/neu |
|----------|----------|------------|-------|------|----------|-----------|
| 24327    | 138      |            |       |      |          |           |
| 24328    | 138      |            |       |      |          |           |
| 24329    | 138      |            |       |      |          |           |
| 24330    | 138      |            |       |      |          |           |
| 24331    | 138      |            |       |      |          |           |
| 24332    | 138      |            |       |      |          |           |
| 24333    | 138      |            |       |      |          |           |
| 24334    | 138      |            |       |      |          |           |
| 24335    | 138      |            |       |      |          |           |
| 24336    | 138      |            |       |      |          |           |
| 24337    | 138      |            |       |      |          |           |
| 24338    | 138      |            |       |      |          |           |
| 24339    | 138      |            |       |      |          |           |



| Ereignis | Aufnahme | DAPI/CK-PE | CK-PE | DAPI | CD45-APC | HER-2/neu |
|----------|----------|------------|-------|------|----------|-----------|
| 24340    | 138      |            |       |      |          |           |
| 24341    | 138      |            |       |      |          |           |
| 24342    | 138      |            |       |      |          |           |
| 24343    | 138      |            |       |      |          |           |
| 24344    | 138      |            |       |      |          |           |
| 24345    | 73       |            |       |      |          |           |
| 24346    | 138      |            |       |      |          |           |
| 24347    | 138      |            |       |      |          |           |
| 24348    | 138      |            |       |      |          |           |
| 24349    | 138      |            |       |      |          |           |
| 24350    | 138      |            |       |      |          |           |
| 24351    | 138      |            |       |      |          |           |



| Ereignis | Aufnahme | DAPI/CK-PE | CK-PE | DAPI | CD45-APC | HER-2/neu |
|----------|----------|------------|-------|------|----------|-----------|
| 24352    | 73       |            |       |      |          |           |
| 24353    | 139      |            |       |      |          |           |
| 24354    | 139      |            |       |      |          |           |
| 24355    | 139      |            |       |      |          |           |
| 24356    | 139      |            |       |      |          |           |
| 24357    | 139      |            |       |      |          |           |
| 24358    | 139      |            |       |      |          |           |
| 24359    | 139      |            |       |      |          |           |
| 24360    | 139      |            |       |      |          |           |
| 24361    | 139      |            |       |      |          |           |
| 24362    | 139      |            |       |      |          |           |
| 24363    | 139      |            |       |      |          |           |
| 24364    | 139      |            |       |      |          |           |
| 24365    | 139      |            |       |      |          |           |



| Ereignis | Aufnahme | DAPI/CK-PE | CK-PE | DAPI | CD45-APC | HER-2/neu |
|----------|----------|------------|-------|------|----------|-----------|
| 24366    | 139      |            |       |      |          |           |
| 24367    | 139      |            |       |      |          |           |
| 24368    | 139      |            |       |      |          |           |
| 24369    | 139      |            |       |      |          |           |
| 24370    | 139      |            |       |      |          |           |
| 24371    | 139      |            |       |      |          |           |
| 24372    | 139      |            |       |      |          |           |
| 24373    | 139      |            |       |      |          |           |
| 24374    | 139      |            |       |      |          |           |
| 24375    | 139      |            |       |      |          |           |
| 24376    | 139      |            |       |      |          |           |
| 24377    | 139      |            |       |      |          |           |
| 24378    | 139      |            |       |      |          |           |

| Ereignis                                                                                  | Aufnahme | DAPI/CK-PE | CK-PE | DAPI | CD45-APC | HER-2/neu |
|-------------------------------------------------------------------------------------------|----------|------------|-------|------|----------|-----------|
| 24379                                                                                     | 139      |            |       |      |          |           |
| 24380                                                                                     | 139      |            |       |      |          |           |
| 24381                                                                                     | 139      |            |       |      |          |           |
| 24382                                                                                     | 139      |            |       |      |          |           |
| 24383                                                                                     | 139      |            |       |      |          |           |
|  24384  | 139      |            |       |      |          |           |
| 24385                                                                                     | 139      |            |       |      |          |           |
| 24386                                                                                     | 139      |            |       |      |          |           |
| 24387                                                                                     | 139      |            |       |      |          |           |
| 24388                                                                                     | 139      |            |       |      |          |           |
|  24389 | 139      |            |       |      |          |           |
| 24390                                                                                     | 139      |            |       |      |          |           |

| Ereignis | Aufnahme | DAPI/CK-PE | CK-PE | DAPI | CD45-APC | HER-2/neu |
|----------|----------|------------|-------|------|----------|-----------|
| 24391    | 139      |            |       |      |          |           |
| 24392    | 139      |            |       |      |          |           |
| 24393    | 139      |            |       |      |          |           |
| 24394    | 139      |            |       |      |          |           |
| 24395    | 139      |            |       |      |          |           |
| 24396    | 139      |            |       |      |          |           |
| 24397    | 139      |            |       |      |          |           |
| 24398    | 139      |            |       |      |          |           |
| 24399    | 139      |            |       |      |          |           |
| 24400    | 139      |            |       |      |          |           |
| 24401    | 139      |            |       |      |          |           |
| 24402    | 139      |            |       |      |          |           |
| 24403    | 139      |            |       |      |          |           |

| Ereignis | Aufnahme | DAPI/CK-PE | CK-PE | DAPI | CD45-APC | HER-2/neu |
|----------|----------|------------|-------|------|----------|-----------|
| 24404    | 139      |            |       |      |          |           |
| 24405    | 139      |            |       |      |          |           |
| 24406    | 139      |            |       |      |          |           |
| 24407    | 139      |            |       |      |          |           |
| 24408    | 139      |            |       |      |          |           |
| 24409    | 139      |            |       |      |          |           |
| 24410    | 139      |            |       |      |          |           |
| 24411    | 139      |            |       |      |          |           |
| 24412    | 139      |            |       |      |          |           |
| 24413    | 139      |            |       |      |          |           |
| 24414    | 139      |            |       |      |          |           |
| 24415    | 139      |            |       |      |          |           |
| 24416    | 138      |            |       |      |          |           |
| 24417    | 72       |            |       |      |          |           |



| Ereignis | Aufnahme | DAPI/CK-PE | CK-PE | DAPI | CD45-APC | HER-2/neu |
|----------|----------|------------|-------|------|----------|-----------|
| 24418    | 139      |            |       |      |          |           |
| 24419    | 140      |            |       |      |          |           |
| 24420    | 140      |            |       |      |          |           |
| 24421    | 140      |            |       |      |          |           |
| 24422    | 140      |            |       |      |          |           |
| 24423    | 140      |            |       |      |          |           |
| 24424    | 140      |            |       |      |          |           |
| 24425    | 140      |            |       |      |          |           |
| 24426    | 140      |            |       |      |          |           |
| 24427    | 140      |            |       |      |          |           |
| 24428    | 140      |            |       |      |          |           |
| 24429    | 140      |            |       |      |          |           |



| Ereignis | Aufnahme | DAPI/CK-PE                                                                          | CK-PE                                                                               | DAPI                                                                                 | CD45-APC                                                                              | HER-2/neu                                                                             |
|----------|----------|-------------------------------------------------------------------------------------|-------------------------------------------------------------------------------------|--------------------------------------------------------------------------------------|---------------------------------------------------------------------------------------|---------------------------------------------------------------------------------------|
| 24430    | 140      | 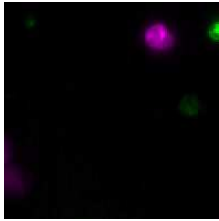   |    |    |    |    |
| 24431    | 140      |    |    |    |    |    |
| 24432    | 140      |    |    |    |    |    |
| 24433    | 140      |    |    |    |    |    |
| 24434    | 140      |    |    |    |    |    |
| 24435    | 140      |   |   |   |   |   |
| 24436    | 140      |  |  |  |  |  |
| 24437    | 140      |  |  |  |  |  |
| 24438    | 140      |  |  |  |  |  |
| 24439    | 140      |  |  |  |  |  |
| 24440    | 140      |  |  |  |  |  |
| 24441    | 140      |  |  |  |  |  |

| Ereignis                                                                                  | Aufnahme | DAPI/CK-PE | CK-PE | DAPI | CD45-APC | HER-2/neu |
|-------------------------------------------------------------------------------------------|----------|------------|-------|------|----------|-----------|
| 24442                                                                                     | 140      |            |       |      |          |           |
| 24443                                                                                     | 140      |            |       |      |          |           |
| 24444                                                                                     | 140      |            |       |      |          |           |
| 24445                                                                                     | 140      |            |       |      |          |           |
|  24446   | 71       |            |       |      |          |           |
| 24447                                                                                     | 140      |            |       |      |          |           |
| 24448                                                                                     | 140      |            |       |      |          |           |
|  24449 | 140      |            |       |      |          |           |
| 24450                                                                                     | 141      |            |       |      |          |           |
| 24451                                                                                     | 141      |            |       |      |          |           |
|  24452 | 141      |            |       |      |          |           |

| Ereignis | Aufnahme | DAPI/CK-PE | CK-PE | DAPI | CD45-APC | HER-2/neu |
|----------|----------|------------|-------|------|----------|-----------|
| 24453    | 142      |            |       |      |          |           |
| 24454    | 142      |            |       |      |          |           |
| 24455    | 142      |            |       |      |          |           |
| 24456    | 142      |            |       |      |          |           |
| 24457    | 142      |            |       |      |          |           |
| 24458    | 142      |            |       |      |          |           |
| 24459    | 142      |            |       |      |          |           |
| 24460    | 142      |            |       |      |          |           |
| 24461    | 142      |            |       |      |          |           |
| 24462    | 142      |            |       |      |          |           |
| 24463    | 142      |            |       |      |          |           |
| 24464    | 142      |            |       |      |          |           |
| 24465    | 142      |            |       |      |          |           |
| 24466    | 142      |            |       |      |          |           |

| Ereignis | Aufnahme | DAPI/CK-PE | CK-PE | DAPI | CD45-APC | HER-2/neu |
|----------|----------|------------|-------|------|----------|-----------|
| 24467    | 142      |            |       |      |          |           |
| 24468    | 142      |            |       |      |          |           |
| 24469    | 142      |            |       |      |          |           |
| 24470    | 142      |            |       |      |          |           |
| 24471    | 142      |            |       |      |          |           |
| 24472    | 142      |            |       |      |          |           |
| 24473    | 142      |            |       |      |          |           |
| 24474    | 142      |            |       |      |          |           |
| 24475    | 142      |            |       |      |          |           |
| 24476    | 142      |            |       |      |          |           |
| 24477    | 139      |            |       |      |          |           |
| 24478    | 142      |            |       |      |          |           |
| 24479    | 142      |            |       |      |          |           |



| Ereignis | Aufnahme | DAPI/CK-PE | CK-PE | DAPI | CD45-APC | HER-2/neu |
|----------|----------|------------|-------|------|----------|-----------|
| 24480    | 139      |            |       |      |          |           |
| 24481    | 143      |            |       |      |          |           |
| 24482    | 143      |            |       |      |          |           |
| 24483    | 143      |            |       |      |          |           |
| 24484    | 143      |            |       |      |          |           |
| 24485    | 143      |            |       |      |          |           |
| 24486    | 143      |            |       |      |          |           |
| 24487    | 143      |            |       |      |          |           |
| 24488    | 143      |            |       |      |          |           |
| 24489    | 143      |            |       |      |          |           |
| 24490    | 143      |            |       |      |          |           |
| 24491    | 143      |            |       |      |          |           |



| Ereignis | Aufnahme | DAPI/CK-PE | CK-PE | DAPI | CD45-APC | HER-2/neu |
|----------|----------|------------|-------|------|----------|-----------|
| 24492    | 143      |            |       |      |          |           |
| 24493    | 143      |            |       |      |          |           |
| 24494    | 143      |            |       |      |          |           |
| 24495    | 143      |            |       |      |          |           |
| 24496    | 143      |            |       |      |          |           |
| 24497    | 143      |            |       |      |          |           |
| 24498    | 143      |            |       |      |          |           |
| 24499    | 143      |            |       |      |          |           |
| 24500    | 143      |            |       |      |          |           |
| 24501    | 143      |            |       |      |          |           |
| 24502    | 143      |            |       |      |          |           |
| 24503    | 143      |            |       |      |          |           |
| 24504    | 143      |            |       |      |          |           |
| 24505    | 143      |            |       |      |          |           |

| Ereignis                                                                                  | Aufnahme | DAPI/CK-PE | CK-PE | DAPI | CD45-APC | HER-2/neu |
|-------------------------------------------------------------------------------------------|----------|------------|-------|------|----------|-----------|
| 24506                                                                                     | 143      |            |       |      |          |           |
| 24507                                                                                     | 143      |            |       |      |          |           |
| 24508                                                                                     | 143      |            |       |      |          |           |
| 24509                                                                                     | 143      |            |       |      |          |           |
| 24510                                                                                     | 143      |            |       |      |          |           |
| 24511                                                                                     | 143      |            |       |      |          |           |
| 24512                                                                                     | 143      |            |       |      |          |           |
| 24513                                                                                     | 143      |            |       |      |          |           |
| 24514                                                                                     | 143      |            |       |      |          |           |
| 24515                                                                                     | 143      |            |       |      |          |           |
| 24516                                                                                     | 143      |            |       |      |          |           |
| 24517                                                                                     | 138      |            |       |      |          |           |
|  24518 | 138      |            |       |      |          |           |

| Ereignis | Aufnahme | DAPI/CK-PE | CK-PE | DAPI | CD45-APC | HER-2/neu |
|----------|----------|------------|-------|------|----------|-----------|
| 24519    | 138      |            |       |      |          |           |
| 24520    | 144      |            |       |      |          |           |
| 24521    | 144      |            |       |      |          |           |
| 24522    | 144      |            |       |      |          |           |
| 24523    | 144      |            |       |      |          |           |
| 24524    | 144      |            |       |      |          |           |
| 24525    | 144      |            |       |      |          |           |
| 24526    | 144      |            |       |      |          |           |
| 24527    | 144      |            |       |      |          |           |
| 24528    | 144      |            |       |      |          |           |
| 24529    | 144      |            |       |      |          |           |
| 24530    | 144      |            |       |      |          |           |

| Ereignis | Aufnahme | DAPI/CK-PE | CK-PE | DAPI | CD45-APC | HER-2/neu |
|----------|----------|------------|-------|------|----------|-----------|
| 24531    | 144      |            |       |      |          |           |
| 24532    | 144      |            |       |      |          |           |
| 24533    | 144      |            |       |      |          |           |
| 24534    | 144      |            |       |      |          |           |
| 24535    | 144      |            |       |      |          |           |
| 24536    | 144      |            |       |      |          |           |
| 24537    | 144      |            |       |      |          |           |
| 24538    | 144      |            |       |      |          |           |
| 24539    | 144      |            |       |      |          |           |
| 24540    | 144      |            |       |      |          |           |
| 24541    | 144      |            |       |      |          |           |
| 24542    | 144      |            |       |      |          |           |
| 24543    | 144      |            |       |      |          |           |

| Ereignis | Aufnahme | DAPI/CK-PE | CK-PE | DAPI | CD45-APC | HER-2/neu |
|----------|----------|------------|-------|------|----------|-----------|
| 24544    | 144      |            |       |      |          |           |
| 24545    | 144      |            |       |      |          |           |
| 24546    | 144      |            |       |      |          |           |
| 24547    | 144      |            |       |      |          |           |
| 24548    | 144      |            |       |      |          |           |
| 24549    | 144      |            |       |      |          |           |
| 24550    | 144      |            |       |      |          |           |
| 24551    | 144      |            |       |      |          |           |
| 24552    | 144      |            |       |      |          |           |
| 24553    | 144      |            |       |      |          |           |
| 24554    | 144      |            |       |      |          |           |
| 24555    | 144      |            |       |      |          |           |



| Ereignis | Aufnahme | DAPI/CK-PE | CK-PE | DAPI | CD45-APC | HER-2/neu |
|----------|----------|------------|-------|------|----------|-----------|
| 24556    | 144      |            |       |      |          |           |
| 24557    | 144      |            |       |      |          |           |
| 24558    | 144      |            |       |      |          |           |
| 24559    | 144      |            |       |      |          |           |
| 24560    | 144      |            |       |      |          |           |
| 24561    | 144      |            |       |      |          |           |
| 24562    | 144      |            |       |      |          |           |
| 24563    | 144      |            |       |      |          |           |
| 24564    | 144      |            |       |      |          |           |
| 24565    | 144      |            |       |      |          |           |
| 24566    | 144      |            |       |      |          |           |
| 24567    | 144      |            |       |      |          |           |
| 24568    | 144      |            |       |      |          |           |

| Ereignis | Aufnahme | DAPI/CK-PE | CK-PE | DAPI | CD45-APC | HER-2/neu |
|----------|----------|------------|-------|------|----------|-----------|
| 24569    | 144      |            |       |      |          |           |
| 24570    | 144      |            |       |      |          |           |
| 24571    | 144      |            |       |      |          |           |
| 24572    | 144      |            |       |      |          |           |
| 24573    | 144      |            |       |      |          |           |
| 24574    | 144      |            |       |      |          |           |
| 24575    | 144      |            |       |      |          |           |
| 24576    | 144      |            |       |      |          |           |
| 24577    | 144      |            |       |      |          |           |
| 24578    | 144      |            |       |      |          |           |
| 24579    | 144      |            |       |      |          |           |
| 24580    | 144      |            |       |      |          |           |

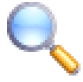

| Ereignis | Aufnahme | DAPI/CK-PE | CK-PE | DAPI | CD45-APC | HER-2/neu |
|----------|----------|------------|-------|------|----------|-----------|
| 24581    | 144      |            |       |      |          |           |
| 24582    | 144      |            |       |      |          |           |
| 24583    | 144      |            |       |      |          |           |
| 24584    | 144      |            |       |      |          |           |
| 24585    | 144      |            |       |      |          |           |
| 24586    | 144      |            |       |      |          |           |
| 24587    | 144      |            |       |      |          |           |
| 24588    | 144      |            |       |      |          |           |
| 24589    | 144      |            |       |      |          |           |
| 24590    | 144      |            |       |      |          |           |
| 24591    | 144      |            |       |      |          |           |
| 24592    | 144      |            |       |      |          |           |
| 24593    | 144      |            |       |      |          |           |

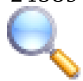

| Ereignis | Aufnahme | DAPI/CK-PE | CK-PE | DAPI | CD45-APC | HER-2/neu |
|----------|----------|------------|-------|------|----------|-----------|
| 24594    | 144      |            |       |      |          |           |
| 24595    | 144      |            |       |      |          |           |
| 24596    | 144      |            |       |      |          |           |
| 24597    | 144      |            |       |      |          |           |
| 24598    | 144      |            |       |      |          |           |
| 24599    | 144      |            |       |      |          |           |
| 24600    | 144      |            |       |      |          |           |
| 24601    | 144      |            |       |      |          |           |
| 24602    | 144      |            |       |      |          |           |
| 24603    | 144      |            |       |      |          |           |
| 24604    | 144      |            |       |      |          |           |
| 24605    | 144      |            |       |      |          |           |
| 24606    | 144      |            |       |      |          |           |



| Ereignis | Aufnahme | DAPI/CK-PE | CK-PE | DAPI | CD45-APC | HER-2/neu |
|----------|----------|------------|-------|------|----------|-----------|
| 24607    | 144      |            |       |      |          |           |
| 24608    | 144      |            |       |      |          |           |
| 24609    | 144      |            |       |      |          |           |
| 24610    | 144      |            |       |      |          |           |
| 24611    | 144      |            |       |      |          |           |
| 24612    | 144      |            |       |      |          |           |
| 24613    | 144      |            |       |      |          |           |
| 24614    | 144      |            |       |      |          |           |
| 24615    | 144      |            |       |      |          |           |
| 24616    | 144      |            |       |      |          |           |
| 24617    | 144      |            |       |      |          |           |
| 24618    | 144      |            |       |      |          |           |

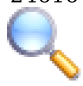



| Ereignis | Aufnahme | DAPI/CK-PE | CK-PE | DAPI | CD45-APC | HER-2/neu |
|----------|----------|------------|-------|------|----------|-----------|
| 24619    | 144      |            |       |      |          |           |
| 24620    | 144      |            |       |      |          |           |
| 24621    | 144      |            |       |      |          |           |
| 24622    | 144      |            |       |      |          |           |
| 24623    | 144      |            |       |      |          |           |
| 24624    | 144      |            |       |      |          |           |
| 24625    | 144      |            |       |      |          |           |
| 24626    | 144      |            |       |      |          |           |
| 24627    | 144      |            |       |      |          |           |
| 24628    | 144      |            |       |      |          |           |
| 24629    | 144      |            |       |      |          |           |
| 24630    | 144      |            |       |      |          |           |
| 24631    | 144      |            |       |      |          |           |

| Ereignis | Aufnahme | DAPI/CK-PE | CK-PE | DAPI | CD45-APC | HER-2/neu |
|----------|----------|------------|-------|------|----------|-----------|
| 24632    | 144      |            |       |      |          |           |
| 24633    | 144      |            |       |      |          |           |
| 24634    | 144      |            |       |      |          |           |
| 24635    | 144      |            |       |      |          |           |
| 24636    | 144      |            |       |      |          |           |
| 24637    | 144      |            |       |      |          |           |
| 24638    | 144      |            |       |      |          |           |
| 24639    | 144      |            |       |      |          |           |
| 24640    | 144      |            |       |      |          |           |
| 24641    | 144      |            |       |      |          |           |
| 24642    | 144      |            |       |      |          |           |

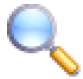

| Ereignis                                                                                     | Aufnahme | DAPI/CK-PE                                                                          | CK-PE                                                                               | DAPI                                                                                 | CD45-APC                                                                              | HER-2/neu                                                                             |
|----------------------------------------------------------------------------------------------|----------|-------------------------------------------------------------------------------------|-------------------------------------------------------------------------------------|--------------------------------------------------------------------------------------|---------------------------------------------------------------------------------------|---------------------------------------------------------------------------------------|
| 24643<br>   | 144      |    |    |    |    |    |
| 24644                                                                                        | 144      |    |    |    |    |    |
| 24645                                                                                        | 144      |    |    |    |    |    |
| 24646                                                                                        | 144      |    |    |    |    |    |
| 24647                                                                                        | 144      |    |    |    |    |    |
| 24648                                                                                        | 144      |   |   |   |   |   |
| 24649<br> | 144      |  |  |  |  |  |
| 24650                                                                                        | 144      |  |  |  |  |  |
| 24651                                                                                        | 144      |  |  |  |  |  |
| 24652                                                                                        | 144      |  |  |  |  |  |
| 24653                                                                                        | 144      |  |  |  |  |  |
| 24654                                                                                        | 144      |  |  |  |  |  |

| Ereignis | Aufnahme | DAPI/CK-PE | CK-PE | DAPI | CD45-APC | HER-2/neu |
|----------|----------|------------|-------|------|----------|-----------|
| 24655    | 144      |            |       |      |          |           |
| 24656    | 144      |            |       |      |          |           |
| 24657    | 144      |            |       |      |          |           |
| 24658    | 144      |            |       |      |          |           |
| 24659    | 144      |            |       |      |          |           |
| 24660    | 144      |            |       |      |          |           |
| 24661    | 144      |            |       |      |          |           |
| 24662    | 144      |            |       |      |          |           |
| 24663    | 144      |            |       |      |          |           |
| 24664    | 144      |            |       |      |          |           |
| 24665    | 144      |            |       |      |          |           |
| 24666    | 144      |            |       |      |          |           |
| 24667    | 144      |            |       |      |          |           |
| 24668    | 144      |            |       |      |          |           |



| Ereignis | Aufnahme | DAPI/CK-PE | CK-PE | DAPI | CD45-APC | HER-2/neu |
|----------|----------|------------|-------|------|----------|-----------|
| 24669    | 144      |            |       |      |          |           |
| 24670    | 144      |            |       |      |          |           |
| 24671    | 144      |            |       |      |          |           |
| 24672    | 144      |            |       |      |          |           |
| 24673    | 144      |            |       |      |          |           |
| 24674    | 144      |            |       |      |          |           |
| 24675    | 144      |            |       |      |          |           |
| 24676    | 144      |            |       |      |          |           |
| 24677    | 144      |            |       |      |          |           |
| 24678    | 144      |            |       |      |          |           |
| 24679    | 144      |            |       |      |          |           |



| Ereignis | Aufnahme | DAPI/CK-PE | CK-PE | DAPI | CD45-APC | HER-2/neu |
|----------|----------|------------|-------|------|----------|-----------|
| 24680    | 144      |            |       |      |          |           |
| 24681    | 144      |            |       |      |          |           |
| 24682    | 137      |            |       |      |          |           |
| 24683    | 144      |            |       |      |          |           |
| 24684    | 144      |            |       |      |          |           |
| 24685    | 144      |            |       |      |          |           |
| 24686    | 145      |            |       |      |          |           |
| 24687    | 145      |            |       |      |          |           |
| 24688    | 145      |            |       |      |          |           |
| 24689    | 145      |            |       |      |          |           |

| Ereignis | Aufnahme | DAPI/CK-PE | CK-PE | DAPI | CD45-APC | HER-2/neu |
|----------|----------|------------|-------|------|----------|-----------|
| 24690    | 145      |            |       |      |          |           |
| 24691    | 145      |            |       |      |          |           |
| 24692    | 145      |            |       |      |          |           |
| 24693    | 145      |            |       |      |          |           |
| 24694    | 145      |            |       |      |          |           |
| 24695    | 145      |            |       |      |          |           |
| 24696    | 145      |            |       |      |          |           |
| 24697    | 145      |            |       |      |          |           |
| 24698    | 145      |            |       |      |          |           |
| 24699    | 145      |            |       |      |          |           |
| 24700    | 145      |            |       |      |          |           |
| 24701    | 145      |            |       |      |          |           |

| Ereignis | Aufnahme | DAPI/CK-PE | CK-PE | DAPI | CD45-APC | HER-2/neu |
|----------|----------|------------|-------|------|----------|-----------|
| 24702    | 145      |            |       |      |          |           |
| 24703    | 145      |            |       |      |          |           |
| 24704    | 145      |            |       |      |          |           |
| 24705    | 145      |            |       |      |          |           |
| 24706    | 145      |            |       |      |          |           |
| 24707    | 145      |            |       |      |          |           |
| 24708    | 145      |            |       |      |          |           |
| 24709    | 145      |            |       |      |          |           |
| 24710    | 145      |            |       |      |          |           |
| 24711    | 145      |            |       |      |          |           |
| 24712    | 145      |            |       |      |          |           |



| Ereignis | Aufnahme | DAPI/CK-PE | CK-PE | DAPI | CD45-APC | HER-2/neu |
|----------|----------|------------|-------|------|----------|-----------|
| 24713    | 145      |            |       |      |          |           |
| 24714    | 145      |            |       |      |          |           |
| 24715    | 145      |            |       |      |          |           |
| 24716    | 145      |            |       |      |          |           |
| 24717    | 145      |            |       |      |          |           |
| 24718    | 145      |            |       |      |          |           |
| 24719    | 145      |            |       |      |          |           |
| 24720    | 145      |            |       |      |          |           |
| 24721    | 145      |            |       |      |          |           |
| 24722    | 145      |            |       |      |          |           |
| 24723    | 145      |            |       |      |          |           |
| 24724    | 144      |            |       |      |          |           |

| Ereignis | Aufnahme | DAPI/CK-PE | CK-PE | DAPI | CD45-APC | HER-2/neu |
|----------|----------|------------|-------|------|----------|-----------|
| 24725    | 145      |            |       |      |          |           |
| 24726    | 144      |            |       |      |          |           |
| 24727    | 136      |            |       |      |          |           |
| 24728    | 146      |            |       |      |          |           |
| 24729    | 146      |            |       |      |          |           |
| 24730    | 146      |            |       |      |          |           |
| 24731    | 146      |            |       |      |          |           |
| 24732    | 146      |            |       |      |          |           |
| 24733    | 146      |            |       |      |          |           |
| 24734    | 146      |            |       |      |          |           |



| Ereignis | Aufnahme | DAPI/CK-PE | CK-PE | DAPI | CD45-APC | HER-2/neu |
|----------|----------|------------|-------|------|----------|-----------|
| 24735    | 146      |            |       |      |          |           |
| 24736    | 146      |            |       |      |          |           |
| 24737    | 146      |            |       |      |          |           |
| 24738    | 146      |            |       |      |          |           |
| 24739    | 146      |            |       |      |          |           |
| 24740    | 146      |            |       |      |          |           |
| 24741    | 146      |            |       |      |          |           |
| 24742    | 146      |            |       |      |          |           |
| 24743    | 146      |            |       |      |          |           |
| 24744    | 146      |            |       |      |          |           |
| 24745    | 146      |            |       |      |          |           |

| Ereignis                                                                                | Aufnahme | DAPI/CK-PE | CK-PE | DAPI | CD45-APC | HER-2/neu |
|-----------------------------------------------------------------------------------------|----------|------------|-------|------|----------|-----------|
| 24746                                                                                   | 146      |            |       |      |          |           |
| 24747                                                                                   | 146      |            |       |      |          |           |
|  24748 | 146      |            |       |      |          |           |
| 24749                                                                                   | 146      |            |       |      |          |           |
| 24750                                                                                   | 146      |            |       |      |          |           |
| 24751                                                                                   | 146      |            |       |      |          |           |
| 24752                                                                                   | 146      |            |       |      |          |           |
| 24753                                                                                   | 146      |            |       |      |          |           |
| 24754                                                                                   | 146      |            |       |      |          |           |
| 24755                                                                                   | 146      |            |       |      |          |           |
| 24756                                                                                   | 146      |            |       |      |          |           |
| 24757                                                                                   | 146      |            |       |      |          |           |

| Ereignis | Aufnahme | DAPI/CK-PE | CK-PE | DAPI | CD45-APC | HER-2/neu |
|----------|----------|------------|-------|------|----------|-----------|
| 24758    | 146      |            |       |      |          |           |
| 24759    | 146      |            |       |      |          |           |
| 24760    | 146      |            |       |      |          |           |
| 24761    | 146      |            |       |      |          |           |
| 24762    | 146      |            |       |      |          |           |
| 24763    | 146      |            |       |      |          |           |
| 24764    | 146      |            |       |      |          |           |
| 24765    | 146      |            |       |      |          |           |
| 24766    | 146      |            |       |      |          |           |
| 24767    | 146      |            |       |      |          |           |
| 24768    | 146      |            |       |      |          |           |

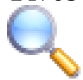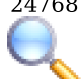

| Ereignis | Aufnahme | DAPI/CK-PE | CK-PE | DAPI | CD45-APC | HER-2/neu |
|----------|----------|------------|-------|------|----------|-----------|
| 24769    | 146      |            |       |      |          |           |
| 24770    | 146      |            |       |      |          |           |
| 24771    | 146      |            |       |      |          |           |
| 24772    | 146      |            |       |      |          |           |
| 24773    | 146      |            |       |      |          |           |
| 24774    | 146      |            |       |      |          |           |
| 24775    | 146      |            |       |      |          |           |
| 24776    | 146      |            |       |      |          |           |
| 24777    | 146      |            |       |      |          |           |
| 24778    | 146      |            |       |      |          |           |
| 24779    | 146      |            |       |      |          |           |
| 24780    | 146      |            |       |      |          |           |

| Ereignis | Aufnahme | DAPI/CK-PE | CK-PE | DAPI | CD45-APC | HER-2/neu |
|----------|----------|------------|-------|------|----------|-----------|
| 24781    | 146      |            |       |      |          |           |
| 24782    | 146      |            |       |      |          |           |
| 24783    | 146      |            |       |      |          |           |
| 24784    | 146      |            |       |      |          |           |
| 24785    | 146      |            |       |      |          |           |
| 24786    | 146      |            |       |      |          |           |
| 24787    | 146      |            |       |      |          |           |
| 24788    | 146      |            |       |      |          |           |
| 24789    | 146      |            |       |      |          |           |
| 24790    | 146      |            |       |      |          |           |
| 24791    | 146      |            |       |      |          |           |
| 24792    | 146      |            |       |      |          |           |

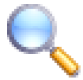



| Ereignis | Aufnahme | DAPI/CK-PE | CK-PE | DAPI | CD45-APC | HER-2/neu |
|----------|----------|------------|-------|------|----------|-----------|
| 24793    | 146      |            |       |      |          |           |
| 24794    | 146      |            |       |      |          |           |
| 24795    | 146      |            |       |      |          |           |
| 24796    | 146      |            |       |      |          |           |
| 24797    | 146      |            |       |      |          |           |
| 24798    | 146      |            |       |      |          |           |
| 24799    | 146      |            |       |      |          |           |
| 24800    | 146      |            |       |      |          |           |
| 24801    | 146      |            |       |      |          |           |
| 24802    | 146      |            |       |      |          |           |
| 24803    | 146      |            |       |      |          |           |
| 24804    | 146      |            |       |      |          |           |
| 24805    | 146      |            |       |      |          |           |
| 24806    | 146      |            |       |      |          |           |

| Ereignis | Aufnahme | DAPI/CK-PE | CK-PE | DAPI | CD45-APC | HER-2/neu |
|----------|----------|------------|-------|------|----------|-----------|
| 24807    | 146      |            |       |      |          |           |
| 24808    | 146      |            |       |      |          |           |
| 24809    | 146      |            |       |      |          |           |
| 24810    | 146      |            |       |      |          |           |
| 24811    | 146      |            |       |      |          |           |
| 24812    | 146      |            |       |      |          |           |
| 24813    | 146      |            |       |      |          |           |
| 24814    | 146      |            |       |      |          |           |
| 24815    | 146      |            |       |      |          |           |
| 24816    | 146      |            |       |      |          |           |
| 24817    | 146      |            |       |      |          |           |
| 24818    | 146      |            |       |      |          |           |
| 24819    | 146      |            |       |      |          |           |

| Ereignis | Aufnahme | DAPI/CK-PE                                                                          | CK-PE                                                                               | DAPI                                                                                 | CD45-APC                                                                              | HER-2/neu                                                                             |
|----------|----------|-------------------------------------------------------------------------------------|-------------------------------------------------------------------------------------|--------------------------------------------------------------------------------------|---------------------------------------------------------------------------------------|---------------------------------------------------------------------------------------|
| 24820    | 146      | 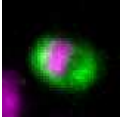   |    |    |    |    |
| 24821    | 146      |    |    |    |    |    |
| 24822    | 146      |    |    |    |    |    |
| 24823    | 146      |    |    |    |    |    |
| 24824    | 146      |    |    |    |    |    |
| 24825    | 146      |   |   |   |   |   |
| 24826    | 146      |  |  |  |  |  |
| 24827    | 146      |  |  |  |  |  |
| 24828    | 146      |  |  |  |  |  |
| 24829    | 146      |  |  |  |  |  |
| 24830    | 146      |  |  |  |  |  |

| Ereignis | Aufnahme | DAPI/CK-PE | CK-PE | DAPI | CD45-APC | HER-2/neu |
|----------|----------|------------|-------|------|----------|-----------|
| 24831    | 146      |            |       |      |          |           |
| 24832    | 146      |            |       |      |          |           |
| 24833    | 146      |            |       |      |          |           |
| 24834    | 146      |            |       |      |          |           |
| 24835    | 146      |            |       |      |          |           |
| 24836    | 146      |            |       |      |          |           |
| 24837    | 146      |            |       |      |          |           |
| 24838    | 146      |            |       |      |          |           |
| 24839    | 146      |            |       |      |          |           |
| 24840    | 146      |            |       |      |          |           |
| 24841    | 146      |            |       |      |          |           |
| 24842    | 146      |            |       |      |          |           |
| 24843    | 146      |            |       |      |          |           |

| Ereignis | Aufnahme | DAPI/CK-PE | CK-PE | DAPI | CD45-APC | HER-2/neu |
|----------|----------|------------|-------|------|----------|-----------|
| 24844    | 146      |            |       |      |          |           |
| 24845    | 146      |            |       |      |          |           |
| 24846    | 146      |            |       |      |          |           |
| 24847    | 146      |            |       |      |          |           |
| 24848    | 135      |            |       |      |          |           |
| 24849    | 135      |            |       |      |          |           |
| 24850    | 146      |            |       |      |          |           |
| 24851    | 146      |            |       |      |          |           |
| 24852    | 147      |            |       |      |          |           |
| 24853    | 147      |            |       |      |          |           |
| 24854    | 147      |            |       |      |          |           |



| Ereignis | Aufnahme | DAPI/CK-PE | CK-PE | DAPI | CD45-APC | HER-2/neu |
|----------|----------|------------|-------|------|----------|-----------|
| 24855    | 147      |            |       |      |          |           |
| 24856    | 147      |            |       |      |          |           |
| 24857    | 147      |            |       |      |          |           |
| 24858    | 147      |            |       |      |          |           |
| 24859    | 147      |            |       |      |          |           |
| 24860    | 147      |            |       |      |          |           |
| 24861    | 147      |            |       |      |          |           |
| 24862    | 147      |            |       |      |          |           |
| 24863    | 147      |            |       |      |          |           |
| 24864    | 147      |            |       |      |          |           |
| 24865    | 147      |            |       |      |          |           |
| 24866    | 147      |            |       |      |          |           |

| Ereignis | Aufnahme | DAPI/CK-PE | CK-PE | DAPI | CD45-APC | HER-2/neu |
|----------|----------|------------|-------|------|----------|-----------|
| 24867    | 147      |            |       |      |          |           |
| 24868    | 147      |            |       |      |          |           |
| 24869    | 147      |            |       |      |          |           |
| 24870    | 147      |            |       |      |          |           |
| 24871    | 147      |            |       |      |          |           |
| 24872    | 147      |            |       |      |          |           |
| 24873    | 147      |            |       |      |          |           |
| 24874    | 147      |            |       |      |          |           |
| 24875    | 147      |            |       |      |          |           |
| 24876    | 147      |            |       |      |          |           |
| 24877    | 147      |            |       |      |          |           |
| 24878    | 147      |            |       |      |          |           |
| 24879    | 147      |            |       |      |          |           |

| Ereignis | Aufnahme | DAPI/CK-PE | CK-PE | DAPI | CD45-APC | HER-2/neu |
|----------|----------|------------|-------|------|----------|-----------|
| 24880    | 147      |            |       |      |          |           |
| 24881    | 147      |            |       |      |          |           |
| 24882    | 147      |            |       |      |          |           |
| 24883    | 147      |            |       |      |          |           |
| 24884    | 147      |            |       |      |          |           |
| 24885    | 147      |            |       |      |          |           |
| 24886    | 147      |            |       |      |          |           |
| 24887    | 147      |            |       |      |          |           |
| 24888    | 147      |            |       |      |          |           |
| 24889    | 147      |            |       |      |          |           |
| 24890    | 147      |            |       |      |          |           |
| 24891    | 147      |            |       |      |          |           |

| Ereignis | Aufnahme | DAPI/CK-PE | CK-PE | DAPI | CD45-APC | HER-2/neu |
|----------|----------|------------|-------|------|----------|-----------|
| 24892    | 147      |            |       |      |          |           |
| 24893    | 147      |            |       |      |          |           |
| 24894    | 147      |            |       |      |          |           |
| 24895    | 147      |            |       |      |          |           |
| 24896    | 147      |            |       |      |          |           |
| 24897    | 147      |            |       |      |          |           |
| 24898    | 147      |            |       |      |          |           |
| 24899    | 147      |            |       |      |          |           |
| 24900    | 147      |            |       |      |          |           |
| 24901    | 147      |            |       |      |          |           |
| 24902    | 147      |            |       |      |          |           |

| Ereignis | Aufnahme | DAPI/CK-PE | CK-PE | DAPI | CD45-APC | HER-2/neu |
|----------|----------|------------|-------|------|----------|-----------|
| 24903    | 147      |            |       |      |          |           |
| 24904    | 147      |            |       |      |          |           |
| 24905    | 147      |            |       |      |          |           |
| 24906    | 147      |            |       |      |          |           |
| 24907    | 147      |            |       |      |          |           |
| 24908    | 147      |            |       |      |          |           |
| 24909    | 147      |            |       |      |          |           |
| 24910    | 147      |            |       |      |          |           |
| 24911    | 147      |            |       |      |          |           |
| 24912    | 147      |            |       |      |          |           |
| 24913    | 147      |            |       |      |          |           |
| 24914    | 147      |            |       |      |          |           |



| Ereignis | Aufnahme | DAPI/CK-PE | CK-PE | DAPI | CD45-APC | HER-2/neu |
|----------|----------|------------|-------|------|----------|-----------|
| 24915    | 147      |            |       |      |          |           |
| 24916    | 147      |            |       |      |          |           |
| 24917    | 147      |            |       |      |          |           |
| 24918    | 147      |            |       |      |          |           |
| 24919    | 147      |            |       |      |          |           |
| 24920    | 147      |            |       |      |          |           |
| 24921    | 147      |            |       |      |          |           |
| 24922    | 147      |            |       |      |          |           |
| 24923    | 147      |            |       |      |          |           |
| 24924    | 147      |            |       |      |          |           |
| 24925    | 147      |            |       |      |          |           |
| 24926    | 147      |            |       |      |          |           |

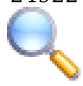

| Ereignis | Aufnahme | DAPI/CK-PE | CK-PE | DAPI | CD45-APC | HER-2/neu |
|----------|----------|------------|-------|------|----------|-----------|
| 24927    | 147      |            |       |      |          |           |
|          |          |            |       |      |          |           |
| 24928    | 147      |            |       |      |          |           |
| 24929    | 147      |            |       |      |          |           |
| 24930    | 147      |            |       |      |          |           |
| 24931    | 147      |            |       |      |          |           |
| 24932    | 147      |            |       |      |          |           |
| 24933    | 147      |            |       |      |          |           |
| 24934    | 147      |            |       |      |          |           |
| 24935    | 147      |            |       |      |          |           |
| 24936    | 147      |            |       |      |          |           |
| 24937    | 147      |            |       |      |          |           |

| Ereignis | Aufnahme | DAPI/CK-PE | CK-PE | DAPI | CD45-APC | HER-2/neu |
|----------|----------|------------|-------|------|----------|-----------|
| 24938    | 147      |            |       |      |          |           |
| 24939    | 147      |            |       |      |          |           |
| 24940    | 147      |            |       |      |          |           |
| 24941    | 147      |            |       |      |          |           |
| 24942    | 147      |            |       |      |          |           |
| 24943    | 147      |            |       |      |          |           |
| 24944    | 147      |            |       |      |          |           |
| 24945    | 147      |            |       |      |          |           |
| 24946    | 147      |            |       |      |          |           |
| 24947    | 147      |            |       |      |          |           |
| 24948    | 147      |            |       |      |          |           |
| 24949    | 147      |            |       |      |          |           |
| 24950    | 147      |            |       |      |          |           |



| Ereignis | Aufnahme | DAPI/CK-PE | CK-PE | DAPI | CD45-APC | HER-2/neu |
|----------|----------|------------|-------|------|----------|-----------|
| 24951    | 147      |            |       |      |          |           |
| 24952    | 147      |            |       |      |          |           |
| 24953    | 147      |            |       |      |          |           |
| 24954    | 147      |            |       |      |          |           |
| 24955    | 147      |            |       |      |          |           |
| 24956    | 147      |            |       |      |          |           |
| 24957    | 147      |            |       |      |          |           |
| 24958    | 147      |            |       |      |          |           |
| 24959    | 147      |            |       |      |          |           |
| 24960    | 147      |            |       |      |          |           |
| 24961    | 147      |            |       |      |          |           |
| 24962    | 147      |            |       |      |          |           |

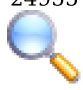

| Ereignis | Aufnahme | DAPI/CK-PE | CK-PE | DAPI | CD45-APC | HER-2/neu |
|----------|----------|------------|-------|------|----------|-----------|
| 24963    | 147      |            |       |      |          |           |
| 24964    | 147      |            |       |      |          |           |
| 24965    | 147      |            |       |      |          |           |
| 24966    | 147      |            |       |      |          |           |
| 24967    | 147      |            |       |      |          |           |
| 24968    | 147      |            |       |      |          |           |
| 24969    | 147      |            |       |      |          |           |
| 24970    | 147      |            |       |      |          |           |
| 24971    | 147      |            |       |      |          |           |
| 24972    | 147      |            |       |      |          |           |
| 24973    | 147      |            |       |      |          |           |
| 24974    | 147      |            |       |      |          |           |
| 24975    | 147      |            |       |      |          |           |

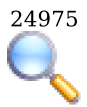



| Ereignis | Aufnahme | DAPI/CK-PE | CK-PE | DAPI | CD45-APC | HER-2/neu |
|----------|----------|------------|-------|------|----------|-----------|
| 24976    | 147      |            |       |      |          |           |
| 24977    | 147      |            |       |      |          |           |
| 24978    | 147      |            |       |      |          |           |
| 24979    | 147      |            |       |      |          |           |
| 24980    | 147      |            |       |      |          |           |
| 24981    | 147      |            |       |      |          |           |
| 24982    | 147      |            |       |      |          |           |
| 24983    | 147      |            |       |      |          |           |
| 24984    | 147      |            |       |      |          |           |
| 24985    | 147      |            |       |      |          |           |
| 24986    | 147      |            |       |      |          |           |

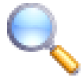

| Ereignis | Aufnahme | DAPI/CK-PE | CK-PE | DAPI | CD45-APC | HER-2/neu |
|----------|----------|------------|-------|------|----------|-----------|
| 24987    | 147      |            |       |      |          |           |
| 24988    | 147      |            |       |      |          |           |
| 24989    | 147      |            |       |      |          |           |
| 24990    | 147      |            |       |      |          |           |
| 24991    | 147      |            |       |      |          |           |
| 24992    | 147      |            |       |      |          |           |
| 24993    | 147      |            |       |      |          |           |
| 24994    | 147      |            |       |      |          |           |
| 24995    | 147      |            |       |      |          |           |
| 24996    | 147      |            |       |      |          |           |
| 24997    | 147      |            |       |      |          |           |
| 24998    | 147      |            |       |      |          |           |

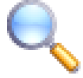

| Ereignis | Aufnahme | DAPI/CK-PE                                                                          | CK-PE                                                                               | DAPI                                                                                 | CD45-APC                                                                              | HER-2/neu                                                                             |
|----------|----------|-------------------------------------------------------------------------------------|-------------------------------------------------------------------------------------|--------------------------------------------------------------------------------------|---------------------------------------------------------------------------------------|---------------------------------------------------------------------------------------|
| 24999    | 147      | 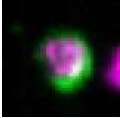   |    |    |    |    |
| 25000    | 147      |    |    |    |    |    |
| 25001    | 147      |    |    |    |    |    |
| 25002    | 147      |    |    |    |    |    |
| 25003    | 147      |    |    |    |    |    |
| 25004    | 147      |   |   |   |   |   |
| 25005    | 147      |  |  |  |  |  |
| 25006    | 147      |  |  |  |  |  |
| 25007    | 147      |  |  |  |  |  |
| 25008    | 147      |  |  |  |  |  |
| 25009    | 147      |  |  |  |  |  |



| Ereignis | Aufnahme | DAPI/CK-PE | CK-PE | DAPI | CD45-APC | HER-2/neu |
|----------|----------|------------|-------|------|----------|-----------|
| 25010    | 147      |            |       |      |          |           |
| 25011    | 147      |            |       |      |          |           |
| 25012    | 146      |            |       |      |          |           |
| 25013    | 146      |            |       |      |          |           |
| 25014    | 134      |            |       |      |          |           |
| 25015    | 134      |            |       |      |          |           |
| 25016    | 147      |            |       |      |          |           |
| 25017    | 134      |            |       |      |          |           |
| 25018    | 148      |            |       |      |          |           |
| 25019    | 148      |            |       |      |          |           |
| 25020    | 148      |            |       |      |          |           |

| Ereignis | Aufnahme | DAPI/CK-PE | CK-PE | DAPI | CD45-APC | HER-2/neu |
|----------|----------|------------|-------|------|----------|-----------|
| 25021    | 148      |            |       |      |          |           |
| 25022    | 148      |            |       |      |          |           |
| 25023    | 148      |            |       |      |          |           |
| 25024    | 148      |            |       |      |          |           |
| 25025    | 148      |            |       |      |          |           |
| 25026    | 148      |            |       |      |          |           |
| 25027    | 148      |            |       |      |          |           |
| 25028    | 148      |            |       |      |          |           |
| 25029    | 148      |            |       |      |          |           |
| 25030    | 148      |            |       |      |          |           |
| 25031    | 148      |            |       |      |          |           |
| 25032    | 148      |            |       |      |          |           |



| Ereignis | Aufnahme | DAPI/CK-PE | CK-PE | DAPI | CD45-APC | HER-2/neu |
|----------|----------|------------|-------|------|----------|-----------|
| 25033    | 148      |            |       |      |          |           |
| 25034    | 148      |            |       |      |          |           |
| 25035    | 148      |            |       |      |          |           |
| 25036    | 148      |            |       |      |          |           |
| 25037    | 148      |            |       |      |          |           |
| 25038    | 148      |            |       |      |          |           |
| 25039    | 148      |            |       |      |          |           |
| 25040    | 148      |            |       |      |          |           |
| 25041    | 148      |            |       |      |          |           |
| 25042    | 148      |            |       |      |          |           |
| 25043    | 148      |            |       |      |          |           |
| 25044    | 148      |            |       |      |          |           |
| 25045    | 148      |            |       |      |          |           |

| Ereignis                                                                                  | Aufnahme | DAPI/CK-PE | CK-PE | DAPI | CD45-APC | HER-2/neu |
|-------------------------------------------------------------------------------------------|----------|------------|-------|------|----------|-----------|
| 25046                                                                                     | 148      |            |       |      |          |           |
| 25047                                                                                     | 148      |            |       |      |          |           |
| 25048                                                                                     | 148      |            |       |      |          |           |
| 25049                                                                                     | 148      |            |       |      |          |           |
| 25050                                                                                     | 148      |            |       |      |          |           |
| 25051                                                                                     | 148      |            |       |      |          |           |
| 25052                                                                                     | 148      |            |       |      |          |           |
| 25053                                                                                     | 148      |            |       |      |          |           |
| 25054                                                                                     | 148      |            |       |      |          |           |
| 25055                                                                                     | 148      |            |       |      |          |           |
| 25056                                                                                     | 148      |            |       |      |          |           |
|  25057 | 148      |            |       |      |          |           |

| Ereignis | Aufnahme | DAPI/CK-PE | CK-PE | DAPI | CD45-APC | HER-2/neu |
|----------|----------|------------|-------|------|----------|-----------|
| 25058    | 148      |            |       |      |          |           |
| 25059    | 148      |            |       |      |          |           |
| 25060    | 148      |            |       |      |          |           |
| 25061    | 148      |            |       |      |          |           |
| 25062    | 148      |            |       |      |          |           |
| 25063    | 148      |            |       |      |          |           |
| 25064    | 148      |            |       |      |          |           |
| 25065    | 148      |            |       |      |          |           |
| 25066    | 148      |            |       |      |          |           |
| 25067    | 148      |            |       |      |          |           |
| 25068    | 148      |            |       |      |          |           |
| 25069    | 148      |            |       |      |          |           |
| 25070    | 148      |            |       |      |          |           |

| Ereignis | Aufnahme | DAPI/CK-PE | CK-PE | DAPI | CD45-APC | HER-2/neu |
|----------|----------|------------|-------|------|----------|-----------|
| 25071    | 148      |            |       |      |          |           |
| 25072    | 148      |            |       |      |          |           |
| 25073    | 148      |            |       |      |          |           |
| 25074    | 148      |            |       |      |          |           |
| 25075    | 148      |            |       |      |          |           |
| 25076    | 148      |            |       |      |          |           |
| 25077    | 148      |            |       |      |          |           |
| 25078    | 148      |            |       |      |          |           |
| 25079    | 148      |            |       |      |          |           |
| 25080    | 148      |            |       |      |          |           |
| 25081    | 148      |            |       |      |          |           |
| 25082    | 148      |            |       |      |          |           |
| 25083    | 148      |            |       |      |          |           |

| Ereignis | Aufnahme | DAPI/CK-PE | CK-PE | DAPI | CD45-APC | HER-2/neu |
|----------|----------|------------|-------|------|----------|-----------|
| 25084    | 148      |            |       |      |          |           |
| 25085    | 148      |            |       |      |          |           |
| 25086    | 148      |            |       |      |          |           |
| 25087    | 148      |            |       |      |          |           |
| 25088    | 148      |            |       |      |          |           |
| 25089    | 148      |            |       |      |          |           |
| 25090    | 148      |            |       |      |          |           |
| 25091    | 148      |            |       |      |          |           |
| 25092    | 148      |            |       |      |          |           |
| 25093    | 148      |            |       |      |          |           |
| 25094    | 148      |            |       |      |          |           |
| 25095    | 148      |            |       |      |          |           |





| Ereignis                                                                                  | Aufnahme | DAPI/CK-PE | CK-PE | DAPI | CD45-APC | HER-2/neu |
|-------------------------------------------------------------------------------------------|----------|------------|-------|------|----------|-----------|
| 25096                                                                                     | 148      |            |       |      |          |           |
| 25097                                                                                     | 148      |            |       |      |          |           |
| 25098                                                                                     | 148      |            |       |      |          |           |
| 25099                                                                                     | 148      |            |       |      |          |           |
| 25100                                                                                     | 148      |            |       |      |          |           |
| 25101                                                                                     | 148      |            |       |      |          |           |
| 25102                                                                                     | 148      |            |       |      |          |           |
| 25103                                                                                     | 148      |            |       |      |          |           |
| 25104                                                                                     | 148      |            |       |      |          |           |
| 25105                                                                                     | 148      |            |       |      |          |           |
|  25106 | 147      |            |       |      |          |           |
|  25107 | 147      |            |       |      |          |           |

| Ereignis | Aufnahme | DAPI/CK-PE | CK-PE | DAPI | CD45-APC | HER-2/neu |
|----------|----------|------------|-------|------|----------|-----------|
| 25108    | 147      |            |       |      |          |           |
| 25109    | 148      |            |       |      |          |           |
| 25110    | 133      |            |       |      |          |           |
| 25111    | 133      |            |       |      |          |           |
| 25112    | 133      |            |       |      |          |           |
| 25113    | 133      |            |       |      |          |           |
| 25114    | 133      |            |       |      |          |           |
| 25115    | 133      |            |       |      |          |           |
| 25116    | 149      |            |       |      |          |           |
| 25117    | 149      |            |       |      |          |           |

| Ereignis                                                                                  | Aufnahme | DAPI/CK-PE | CK-PE | DAPI | CD45-APC | HER-2/neu |
|-------------------------------------------------------------------------------------------|----------|------------|-------|------|----------|-----------|
| 25118                                                                                     | 149      |            |       |      |          |           |
| 25119                                                                                     | 149      |            |       |      |          |           |
| 25120                                                                                     | 149      |            |       |      |          |           |
| 25121                                                                                     | 149      |            |       |      |          |           |
| 25122                                                                                     | 149      |            |       |      |          |           |
| 25123                                                                                     | 149      |            |       |      |          |           |
| 25124                                                                                     | 149      |            |       |      |          |           |
| 25125                                                                                     | 149      |            |       |      |          |           |
| 25126                                                                                     | 149      |            |       |      |          |           |
| 25127                                                                                     | 149      |            |       |      |          |           |
|  25128 | 149      |            |       |      |          |           |
| 25129                                                                                     | 149      |            |       |      |          |           |
| 25130                                                                                     | 149      |            |       |      |          |           |

| Ereignis | Aufnahme | DAPI/CK-PE | CK-PE | DAPI | CD45-APC | HER-2/neu |
|----------|----------|------------|-------|------|----------|-----------|
| 25131    | 149      |            |       |      |          |           |
| 25132    | 149      |            |       |      |          |           |
| 25133    | 149      |            |       |      |          |           |
| 25134    | 149      |            |       |      |          |           |
| 25135    | 149      |            |       |      |          |           |
| 25136    | 149      |            |       |      |          |           |
| 25137    | 149      |            |       |      |          |           |
| 25138    | 149      |            |       |      |          |           |
| 25139    | 149      |            |       |      |          |           |
| 25140    | 149      |            |       |      |          |           |
| 25141    | 149      |            |       |      |          |           |

| Ereignis | Aufnahme | DAPI/CK-PE | CK-PE | DAPI | CD45-APC | HER-2/neu |
|----------|----------|------------|-------|------|----------|-----------|
| 25142    | 149      |            |       |      |          |           |
| 25143    | 149      |            |       |      |          |           |
| 25144    | 149      |            |       |      |          |           |
| 25145    | 149      |            |       |      |          |           |
| 25146    | 149      |            |       |      |          |           |
| 25147    | 149      |            |       |      |          |           |
| 25148    | 149      |            |       |      |          |           |
| 25149    | 149      |            |       |      |          |           |
| 25150    | 149      |            |       |      |          |           |
| 25151    | 149      |            |       |      |          |           |
| 25152    | 149      |            |       |      |          |           |
| 25153    | 149      |            |       |      |          |           |
| 25154    | 149      |            |       |      |          |           |



| Ereignis | Aufnahme | DAPI/CK-PE | CK-PE | DAPI | CD45-APC | HER-2/neu |
|----------|----------|------------|-------|------|----------|-----------|
| 25155    | 149      |            |       |      |          |           |
| 25156    | 149      |            |       |      |          |           |
| 25157    | 149      |            |       |      |          |           |
| 25158    | 149      |            |       |      |          |           |
| 25159    | 149      |            |       |      |          |           |
| 25160    | 149      |            |       |      |          |           |
| 25161    | 149      |            |       |      |          |           |
| 25162    | 149      |            |       |      |          |           |
| 25163    | 149      |            |       |      |          |           |
| 25164    | 149      |            |       |      |          |           |
| 25165    | 149      |            |       |      |          |           |
| 25166    | 149      |            |       |      |          |           |

| Ereignis | Aufnahme | DAPI/CK-PE | CK-PE | DAPI | CD45-APC | HER-2/neu |
|----------|----------|------------|-------|------|----------|-----------|
| 25167    | 149      |            |       |      |          |           |
| 25168    | 149      |            |       |      |          |           |
| 25169    | 149      |            |       |      |          |           |
| 25170    | 149      |            |       |      |          |           |
| 25171    | 149      |            |       |      |          |           |
| 25172    | 149      |            |       |      |          |           |
| 25173    | 149      |            |       |      |          |           |
| 25174    | 149      |            |       |      |          |           |
| 25175    | 149      |            |       |      |          |           |
| 25176    | 149      |            |       |      |          |           |
| 25177    | 149      |            |       |      |          |           |
| 25178    | 149      |            |       |      |          |           |
| 25179    | 149      |            |       |      |          |           |

| Ereignis | Aufnahme | DAPI/CK-PE | CK-PE | DAPI | CD45-APC | HER-2/neu |
|----------|----------|------------|-------|------|----------|-----------|
| 25180    | 149      |            |       |      |          |           |
| 25181    | 149      |            |       |      |          |           |
| 25182    | 149      |            |       |      |          |           |
| 25183    | 149      |            |       |      |          |           |
| 25184    | 149      |            |       |      |          |           |
| 25185    | 149      |            |       |      |          |           |
| 25186    | 149      |            |       |      |          |           |
| 25187    | 149      |            |       |      |          |           |
| 25188    | 149      |            |       |      |          |           |
| 25189    | 149      |            |       |      |          |           |

| Ereignis | Aufnahme | DAPI/CK-PE                                                                          | CK-PE                                                                               | DAPI                                                                                 | CD45-APC                                                                              | HER-2/neu                                                                             |
|----------|----------|-------------------------------------------------------------------------------------|-------------------------------------------------------------------------------------|--------------------------------------------------------------------------------------|---------------------------------------------------------------------------------------|---------------------------------------------------------------------------------------|
| 25190    | 149      | 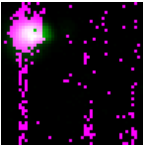   |    |    |    |    |
| 25191    | 149      |    |    |    |    |    |
| 25192    | 149      |    |    |    |    |    |
| 25193    | 149      |    |    |    |    |    |
| 25194    | 149      |    |    |    |    |    |
| 25195    | 149      |   |   |   |   |   |
| 25196    | 149      |  |  |  |  |  |
| 25197    | 149      |  |  |  |  |  |
| 25198    | 149      |  |  |  |  |  |
| 25199    | 149      |  |  |  |  |  |
| 25200    | 149      |  |  |  |  |  |
| 25201    | 149      |  |  |  |  |  |



| Ereignis | Aufnahme | DAPI/CK-PE | CK-PE | DAPI | CD45-APC | HER-2/neu |
|----------|----------|------------|-------|------|----------|-----------|
| 25202    | 149      |            |       |      |          |           |
| 25203    | 149      |            |       |      |          |           |
| 25204    | 149      |            |       |      |          |           |
| 25205    | 149      |            |       |      |          |           |
| 25206    | 149      |            |       |      |          |           |
| 25207    | 149      |            |       |      |          |           |
| 25208    | 149      |            |       |      |          |           |
| 25209    | 149      |            |       |      |          |           |
| 25210    | 149      |            |       |      |          |           |
| 25211    | 149      |            |       |      |          |           |
| 25212    | 149      |            |       |      |          |           |
| 25213    | 149      |            |       |      |          |           |



| Ereignis | Aufnahme | DAPI/CK-PE | CK-PE | DAPI | CD45-APC | HER-2/neu |
|----------|----------|------------|-------|------|----------|-----------|
| 25214    | 149      |            |       |      |          |           |
|          |          |            |       |      |          |           |
| 25215    | 149      |            |       |      |          |           |
| 25216    | 149      |            |       |      |          |           |
| 25217    | 149      |            |       |      |          |           |
| 25218    | 149      |            |       |      |          |           |
| 25219    | 149      |            |       |      |          |           |
| 25220    | 149      |            |       |      |          |           |
| 25221    | 149      |            |       |      |          |           |
| 25222    | 149      |            |       |      |          |           |
| 25223    | 149      |            |       |      |          |           |
| 25224    | 149      |            |       |      |          |           |
| 25225    | 149      |            |       |      |          |           |

| Ereignis | Aufnahme | DAPI/CK-PE | CK-PE | DAPI | CD45-APC | HER-2/neu |
|----------|----------|------------|-------|------|----------|-----------|
| 25226    | 149      |            |       |      |          |           |
| 25227    | 149      |            |       |      |          |           |
| 25228    | 149      |            |       |      |          |           |
| 25229    | 149      |            |       |      |          |           |
| 25230    | 149      |            |       |      |          |           |
| 25231    | 149      |            |       |      |          |           |
| 25232    | 149      |            |       |      |          |           |
| 25233    | 149      |            |       |      |          |           |
| 25234    | 149      |            |       |      |          |           |
| 25235    | 149      |            |       |      |          |           |
| 25236    | 149      |            |       |      |          |           |
| 25237    | 149      |            |       |      |          |           |

| Ereignis | Aufnahme | DAPI/CK-PE                                                                          | CK-PE                                                                               | DAPI                                                                                 | CD45-APC                                                                              | HER-2/neu                                                                             |
|----------|----------|-------------------------------------------------------------------------------------|-------------------------------------------------------------------------------------|--------------------------------------------------------------------------------------|---------------------------------------------------------------------------------------|---------------------------------------------------------------------------------------|
| 25238    | 149      | 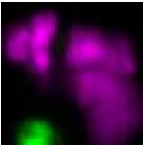   |    |    |    |    |
| 25239    | 149      |    |    |    |    |    |
| 25240    | 149      |    |    |    |    |    |
| 25241    | 149      |    |    |    |    |    |
| 25242    | 149      |   |   |   |   |   |
| 25243    | 149      |  |  |  |  |  |
| 25244    | 149      |  |  |  |  |  |
| 25245    | 149      |  |  |  |  |  |
| 25246    | 149      |  |  |  |  |  |
| 25247    | 149      |  |  |  |  |  |
| 25248    | 149      |  |  |  |  |  |

| Ereignis | Aufnahme | DAPI/CK-PE | CK-PE | DAPI | CD45-APC | HER-2/neu |
|----------|----------|------------|-------|------|----------|-----------|
| 25249    | 149      |            |       |      |          |           |
| 25250    | 149      |            |       |      |          |           |
| 25251    | 149      |            |       |      |          |           |
| 25252    | 149      |            |       |      |          |           |
| 25253    | 149      |            |       |      |          |           |
| 25254    | 149      |            |       |      |          |           |
| 25255    | 149      |            |       |      |          |           |
| 25256    | 149      |            |       |      |          |           |
| 25257    | 149      |            |       |      |          |           |
| 25258    | 149      |            |       |      |          |           |
| 25259    | 149      |            |       |      |          |           |
| 25260    | 149      |            |       |      |          |           |





| Ereignis                                                                                  | Aufnahme | DAPI/CK-PE | CK-PE | DAPI | CD45-APC | HER-2/neu |
|-------------------------------------------------------------------------------------------|----------|------------|-------|------|----------|-----------|
| 25261                                                                                     | 149      |            |       |      |          |           |
| 25262                                                                                     | 149      |            |       |      |          |           |
| 25263                                                                                     | 149      |            |       |      |          |           |
| 25264                                                                                     | 149      |            |       |      |          |           |
| 25265                                                                                     | 149      |            |       |      |          |           |
|  25266   | 149      |            |       |      |          |           |
| 25267                                                                                     | 149      |            |       |      |          |           |
| 25268                                                                                     | 149      |            |       |      |          |           |
| 25269                                                                                     | 149      |            |       |      |          |           |
|  25270 | 149      |            |       |      |          |           |
|  25271 | 149      |            |       |      |          |           |



| Ereignis | Aufnahme | DAPI/CK-PE | CK-PE | DAPI | CD45-APC | HER-2/neu |
|----------|----------|------------|-------|------|----------|-----------|
| 25272    | 149      |            |       |      |          |           |
| 25273    | 149      |            |       |      |          |           |
| 25274    | 149      |            |       |      |          |           |
| 25275    | 149      |            |       |      |          |           |
| 25276    | 149      |            |       |      |          |           |
| 25277    | 149      |            |       |      |          |           |
| 25278    | 149      |            |       |      |          |           |
| 25279    | 149      |            |       |      |          |           |
| 25280    | 149      |            |       |      |          |           |
| 25281    | 149      |            |       |      |          |           |
| 25282    | 149      |            |       |      |          |           |
| 25283    | 149      |            |       |      |          |           |

| Ereignis | Aufnahme | DAPI/CK-PE | CK-PE | DAPI | CD45-APC | HER-2/neu |
|----------|----------|------------|-------|------|----------|-----------|
| 25284    | 149      |            |       |      |          |           |
| 25285    | 149      |            |       |      |          |           |
| 25286    | 149      |            |       |      |          |           |
| 25287    | 149      |            |       |      |          |           |
| 25288    | 149      |            |       |      |          |           |
| 25289    | 149      |            |       |      |          |           |
| 25290    | 149      |            |       |      |          |           |
| 25291    | 149      |            |       |      |          |           |
| 25292    | 149      |            |       |      |          |           |
| 25293    | 149      |            |       |      |          |           |
| 25294    | 149      |            |       |      |          |           |
| 25295    | 148      |            |       |      |          |           |

| Ereignis | Aufnahme | DAPI/CK-PE | CK-PE | DAPI | CD45-APC | HER-2/neu |
|----------|----------|------------|-------|------|----------|-----------|
| 25296    | 148      |            |       |      |          |           |
|          |          |            |       |      |          |           |
| 25297    | 149      |            |       |      |          |           |
| 25298    | 132      |            |       |      |          |           |
|          |          |            |       |      |          |           |
| 25299    | 132      |            |       |      |          |           |
|          |          |            |       |      |          |           |
| 25300    | 132      |            |       |      |          |           |
|          |          |            |       |      |          |           |
| 25301    | 149      |            |       |      |          |           |
|          |          |            |       |      |          |           |
| 25302    | 149      |            |       |      |          |           |
|          |          |            |       |      |          |           |
| 25303    | 132      |            |       |      |          |           |
|          |          |            |       |      |          |           |
| 25304    | 150      |            |       |      |          |           |
|          |          |            |       |      |          |           |
| 25305    | 150      |            |       |      |          |           |
|          |          |            |       |      |          |           |

| Ereignis | Aufnahme | DAPI/CK-PE | CK-PE | DAPI | CD45-APC | HER-2/neu |
|----------|----------|------------|-------|------|----------|-----------|
| 25306    | 150      |            |       |      |          |           |
| 25307    | 150      |            |       |      |          |           |
| 25308    | 150      |            |       |      |          |           |
| 25309    | 150      |            |       |      |          |           |
| 25310    | 150      |            |       |      |          |           |
| 25311    | 150      |            |       |      |          |           |
| 25312    | 150      |            |       |      |          |           |
| 25313    | 150      |            |       |      |          |           |
| 25314    | 150      |            |       |      |          |           |
| 25315    | 150      |            |       |      |          |           |
| 25316    | 150      |            |       |      |          |           |
| 25317    | 150      |            |       |      |          |           |



| Ereignis | Aufnahme | DAPI/CK-PE | CK-PE | DAPI | CD45-APC | HER-2/neu |
|----------|----------|------------|-------|------|----------|-----------|
| 25318    | 150      |            |       |      |          |           |
| 25319    | 131      |            |       |      |          |           |
| 25320    | 149      |            |       |      |          |           |
| 25321    | 151      |            |       |      |          |           |
| 25322    | 151      |            |       |      |          |           |
| 25323    | 151      |            |       |      |          |           |
| 25324    | 151      |            |       |      |          |           |
| 25325    | 151      |            |       |      |          |           |
| 25326    | 151      |            |       |      |          |           |
| 25327    | 151      |            |       |      |          |           |
| 25328    | 151      |            |       |      |          |           |



| Ereignis | Aufnahme | DAPI/CK-PE | CK-PE | DAPI | CD45-APC | HER-2/neu |
|----------|----------|------------|-------|------|----------|-----------|
| 25329    | 151      |            |       |      |          |           |
| 25330    | 151      |            |       |      |          |           |
| 25331    | 151      |            |       |      |          |           |
| 25332    | 151      |            |       |      |          |           |
| 25333    | 151      |            |       |      |          |           |
| 25334    | 151      |            |       |      |          |           |
| 25335    | 151      |            |       |      |          |           |
| 25336    | 151      |            |       |      |          |           |
| 25337    | 151      |            |       |      |          |           |
| 25338    | 151      |            |       |      |          |           |
| 25339    | 151      |            |       |      |          |           |
| 25340    | 151      |            |       |      |          |           |
| 25341    | 151      |            |       |      |          |           |

| Ereignis | Aufnahme | DAPI/CK-PE | CK-PE | DAPI | CD45-APC | HER-2/neu |
|----------|----------|------------|-------|------|----------|-----------|
| 25342    | 151      |            |       |      |          |           |
| 25343    | 151      |            |       |      |          |           |
| 25344    | 151      |            |       |      |          |           |
| 25345    | 151      |            |       |      |          |           |
| 25346    | 151      |            |       |      |          |           |
| 25347    | 151      |            |       |      |          |           |
| 25348    | 151      |            |       |      |          |           |
| 25349    | 151      |            |       |      |          |           |
| 25350    | 151      |            |       |      |          |           |
| 25351    | 151      |            |       |      |          |           |
| 25352    | 151      |            |       |      |          |           |

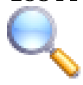

| Ereignis | Aufnahme | DAPI/CK-PE | CK-PE | DAPI | CD45-APC | HER-2/neu |
|----------|----------|------------|-------|------|----------|-----------|
| 25353    | 151      |            |       |      |          |           |
| 25354    | 151      |            |       |      |          |           |
| 25355    | 151      |            |       |      |          |           |
| 25356    | 151      |            |       |      |          |           |
| 25357    | 151      |            |       |      |          |           |
| 25358    | 151      |            |       |      |          |           |
| 25359    | 151      |            |       |      |          |           |
| 25360    | 151      |            |       |      |          |           |
| 25361    | 151      |            |       |      |          |           |
| 25362    | 151      |            |       |      |          |           |
| 25363    | 151      |            |       |      |          |           |

| Ereignis | Aufnahme | DAPI/CK-PE | CK-PE | DAPI | CD45-APC | HER-2/neu |
|----------|----------|------------|-------|------|----------|-----------|
| 25364    | 151      |            |       |      |          |           |
| 25365    | 151      |            |       |      |          |           |
| 25366    | 151      |            |       |      |          |           |
| 25367    | 151      |            |       |      |          |           |
| 25368    | 151      |            |       |      |          |           |
| 25369    | 151      |            |       |      |          |           |
| 25370    | 151      |            |       |      |          |           |
| 25371    | 151      |            |       |      |          |           |
| 25372    | 151      |            |       |      |          |           |
| 25373    | 151      |            |       |      |          |           |
| 25374    | 151      |            |       |      |          |           |
| 25375    | 151      |            |       |      |          |           |



| Ereignis | Aufnahme | DAPI/CK-PE                                                                          | CK-PE                                                                               | DAPI                                                                                 | CD45-APC                                                                              | HER-2/neu                                                                             |
|----------|----------|-------------------------------------------------------------------------------------|-------------------------------------------------------------------------------------|--------------------------------------------------------------------------------------|---------------------------------------------------------------------------------------|---------------------------------------------------------------------------------------|
| 25376    | 151      | 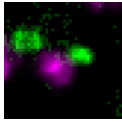   |    |    |    |    |
| 25377    | 151      |    |    |    |    |    |
| 25378    | 151      |    |    |    |    |    |
| 25379    | 151      |    |    |    |    |    |
| 25380    | 151      |    |    |    |    |    |
| 25381    | 151      |    |    |    |    |    |
| 25382    | 151      |   |   |   |   |   |
| 25383    | 151      |  |  |  |  |  |
| 25384    | 151      |  |  |  |  |  |
| 25385    | 151      |  |  |  |  |  |
| 25386    | 151      |  |  |  |  |  |
| 25387    | 151      |  |  |  |  |  |
| 25388    | 151      |  |  |  |  |  |



| Ereignis | Aufnahme | DAPI/CK-PE | CK-PE | DAPI | CD45-APC | HER-2/neu |
|----------|----------|------------|-------|------|----------|-----------|
| 25389    | 151      |            |       |      |          |           |
| 25390    | 151      |            |       |      |          |           |
| 25391    | 151      |            |       |      |          |           |
| 25392    | 151      |            |       |      |          |           |
| 25393    | 151      |            |       |      |          |           |
| 25394    | 151      |            |       |      |          |           |
| 25395    | 151      |            |       |      |          |           |
| 25396    | 151      |            |       |      |          |           |
| 25397    | 151      |            |       |      |          |           |
| 25398    | 151      |            |       |      |          |           |
| 25399    | 151      |            |       |      |          |           |
| 25400    | 151      |            |       |      |          |           |
| 25401    | 151      |            |       |      |          |           |
| 25402    | 151      |            |       |      |          |           |

| Ereignis | Aufnahme | DAPI/CK-PE | CK-PE | DAPI | CD45-APC | HER-2/neu |
|----------|----------|------------|-------|------|----------|-----------|
| 25403    | 151      |            |       |      |          |           |
| 25404    | 151      |            |       |      |          |           |
| 25405    | 151      |            |       |      |          |           |
| 25406    | 151      |            |       |      |          |           |
| 25407    | 151      |            |       |      |          |           |
| 25408    | 151      |            |       |      |          |           |
| 25409    | 151      |            |       |      |          |           |
| 25410    | 151      |            |       |      |          |           |
| 25411    | 151      |            |       |      |          |           |
| 25412    | 151      |            |       |      |          |           |
| 25413    | 151      |            |       |      |          |           |
| 25414    | 151      |            |       |      |          |           |

| Ereignis                                                                                | Aufnahme | DAPI/CK-PE | CK-PE | DAPI | CD45-APC | HER-2/neu |
|-----------------------------------------------------------------------------------------|----------|------------|-------|------|----------|-----------|
| 25415                                                                                   | 151      |            |       |      |          |           |
| 25416                                                                                   | 151      |            |       |      |          |           |
| 25417                                                                                   | 151      |            |       |      |          |           |
| 25418                                                                                   | 151      |            |       |      |          |           |
|  25419 | 151      |            |       |      |          |           |
| 25420                                                                                   | 151      |            |       |      |          |           |
| 25421                                                                                   | 151      |            |       |      |          |           |
| 25422                                                                                   | 151      |            |       |      |          |           |
| 25423                                                                                   | 151      |            |       |      |          |           |
| 25424                                                                                   | 151      |            |       |      |          |           |
| 25425                                                                                   | 151      |            |       |      |          |           |
| 25426                                                                                   | 151      |            |       |      |          |           |

| Ereignis                                                                                     | Aufnahme | DAPI/CK-PE                                                                          | CK-PE                                                                               | DAPI                                                                                 | CD45-APC                                                                              | HER-2/neu                                                                             |
|----------------------------------------------------------------------------------------------|----------|-------------------------------------------------------------------------------------|-------------------------------------------------------------------------------------|--------------------------------------------------------------------------------------|---------------------------------------------------------------------------------------|---------------------------------------------------------------------------------------|
| 25427<br>   | 151      |    |    |    |    |    |
| 25428                                                                                        | 151      |    |    |    |    |    |
| 25429                                                                                        | 151      |    |    |    |    |    |
| 25430                                                                                        | 151      |    |    |    |    |    |
| 25431                                                                                        | 151      |    |    |    |    |    |
| 25432                                                                                        | 151      |   |   |   |   |   |
| 25433                                                                                        | 151      |  |  |  |  |  |
| 25434<br> | 151      |  |  |  |  |  |
| 25435                                                                                        | 151      |  |  |  |  |  |
| 25436                                                                                        | 151      |  |  |  |  |  |
| 25437                                                                                        | 151      |  |  |  |  |  |
| 25438                                                                                        | 151      |  |  |  |  |  |



| Ereignis | Aufnahme | DAPI/CK-PE | CK-PE | DAPI | CD45-APC | HER-2/neu |
|----------|----------|------------|-------|------|----------|-----------|
| 25439    | 151      |            |       |      |          |           |
| 25440    | 151      |            |       |      |          |           |
| 25441    | 151      |            |       |      |          |           |
| 25442    | 151      |            |       |      |          |           |
| 25443    | 151      |            |       |      |          |           |
| 25444    | 151      |            |       |      |          |           |
| 25445    | 151      |            |       |      |          |           |
| 25446    | 151      |            |       |      |          |           |
| 25447    | 151      |            |       |      |          |           |
| 25448    | 151      |            |       |      |          |           |
| 25449    | 151      |            |       |      |          |           |
| 25450    | 151      |            |       |      |          |           |
| 25451    | 151      |            |       |      |          |           |



| Ereignis | Aufnahme | DAPI/CK-PE | CK-PE | DAPI | CD45-APC | HER-2/neu |
|----------|----------|------------|-------|------|----------|-----------|
| 25452    | 151      |            |       |      |          |           |
| 25453    | 151      |            |       |      |          |           |
| 25454    | 151      |            |       |      |          |           |
| 25455    | 151      |            |       |      |          |           |
| 25456    | 151      |            |       |      |          |           |
| 25457    | 151      |            |       |      |          |           |
| 25458    | 151      |            |       |      |          |           |
| 25459    | 151      |            |       |      |          |           |
| 25460    | 151      |            |       |      |          |           |
| 25461    | 151      |            |       |      |          |           |
| 25462    | 151      |            |       |      |          |           |
| 25463    | 151      |            |       |      |          |           |

| Ereignis | Aufnahme | DAPI/CK-PE | CK-PE | DAPI | CD45-APC | HER-2/neu |
|----------|----------|------------|-------|------|----------|-----------|
| 25464    | 151      |            |       |      |          |           |
| 25465    | 151      |            |       |      |          |           |
| 25466    | 151      |            |       |      |          |           |
| 25467    | 151      |            |       |      |          |           |
| 25468    | 151      |            |       |      |          |           |
| 25469    | 151      |            |       |      |          |           |
| 25470    | 151      |            |       |      |          |           |
| 25471    | 151      |            |       |      |          |           |
| 25472    | 151      |            |       |      |          |           |
| 25473    | 151      |            |       |      |          |           |
| 25474    | 151      |            |       |      |          |           |
| 25475    | 151      |            |       |      |          |           |

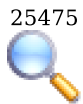

| Ereignis | Aufnahme | DAPI/CK-PE | CK-PE | DAPI | CD45-APC | HER-2/neu |
|----------|----------|------------|-------|------|----------|-----------|
| 25476    | 151      |            |       |      |          |           |
| 25477    | 151      |            |       |      |          |           |
| 25478    | 151      |            |       |      |          |           |
| 25479    | 151      |            |       |      |          |           |
| 25480    | 151      |            |       |      |          |           |
| 25481    | 151      |            |       |      |          |           |
| 25482    | 151      |            |       |      |          |           |
| 25483    | 151      |            |       |      |          |           |
| 25484    | 151      |            |       |      |          |           |
| 25485    | 151      |            |       |      |          |           |
| 25486    | 151      |            |       |      |          |           |
| 25487    | 151      |            |       |      |          |           |
| 25488    | 151      |            |       |      |          |           |

| Ereignis | Aufnahme | DAPI/CK-PE | CK-PE | DAPI | CD45-APC | HER-2/neu |
|----------|----------|------------|-------|------|----------|-----------|
| 25489    | 151      |            |       |      |          |           |
| 25490    | 151      |            |       |      |          |           |
| 25491    | 151      |            |       |      |          |           |
| 25492    | 151      |            |       |      |          |           |
| 25493    | 151      |            |       |      |          |           |
| 25494    | 151      |            |       |      |          |           |
| 25495    | 151      |            |       |      |          |           |
| 25496    | 151      |            |       |      |          |           |
| 25497    | 151      |            |       |      |          |           |
| 25498    | 151      |            |       |      |          |           |

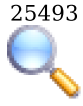



| Ereignis | Aufnahme | DAPI/CK-PE | CK-PE | DAPI | CD45-APC | HER-2/neu |
|----------|----------|------------|-------|------|----------|-----------|
| 25499    | 151      |            |       |      |          |           |
| 25500    | 151      |            |       |      |          |           |
| 25501    | 151      |            |       |      |          |           |
| 25502    | 151      |            |       |      |          |           |
| 25503    | 130      |            |       |      |          |           |
| 25504    | 130      |            |       |      |          |           |
| 25505    | 151      |            |       |      |          |           |
| 25506    | 130      |            |       |      |          |           |
| 25507    | 151      |            |       |      |          |           |
| 25508    | 130      |            |       |      |          |           |
| 25509    | 130      |            |       |      |          |           |



| Ereignis | Aufnahme | DAPI/CK-PE | CK-PE | DAPI | CD45-APC | HER-2/neu |
|----------|----------|------------|-------|------|----------|-----------|
| 25510    | 151      |            |       |      |          |           |
| 25511    | 130      |            |       |      |          |           |
| 25512    | 130      |            |       |      |          |           |
| 25513    | 152      |            |       |      |          |           |
| 25514    | 152      |            |       |      |          |           |
| 25515    | 152      |            |       |      |          |           |
| 25516    | 152      |            |       |      |          |           |
| 25517    | 152      |            |       |      |          |           |
| 25518    | 152      |            |       |      |          |           |
| 25519    | 152      |            |       |      |          |           |
| 25520    | 152      |            |       |      |          |           |
| 25521    | 152      |            |       |      |          |           |

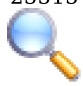

| Ereignis | Aufnahme | DAPI/CK-PE                                                                          | CK-PE                                                                               | DAPI                                                                                 | CD45-APC                                                                              | HER-2/neu                                                                             |
|----------|----------|-------------------------------------------------------------------------------------|-------------------------------------------------------------------------------------|--------------------------------------------------------------------------------------|---------------------------------------------------------------------------------------|---------------------------------------------------------------------------------------|
| 25522    | 152      | 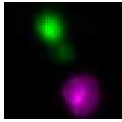   |    |    |    |    |
| 25523    | 152      |    |    |    |    |    |
| 25524    | 152      |    |    |    |    |    |
| 25525    | 152      |    |    |    |    |    |
| 25526    | 152      |    |    |    |    |    |
| 25527    | 152      |   |   |   |   |   |
| 25528    | 152      |  |  |  |  |  |
| 25529    | 152      |  |  |  |  |  |
| 25530    | 152      |  |  |  |  |  |
| 25531    | 152      |  |  |  |  |  |
| 25532    | 152      |  |  |  |  |  |
| 25533    | 152      |  |  |  |  |  |

| Ereignis                                                                                 | Aufnahme | DAPI/CK-PE | CK-PE | DAPI | CD45-APC | HER-2/neu |
|------------------------------------------------------------------------------------------|----------|------------|-------|------|----------|-----------|
| 25534                                                                                    | 152      |            |       |      |          |           |
|  25535  | 152      |            |       |      |          |           |
| 25536                                                                                    | 152      |            |       |      |          |           |
| 25537                                                                                    | 152      |            |       |      |          |           |
|  25538 | 152      |            |       |      |          |           |
| 25539                                                                                    | 152      |            |       |      |          |           |
| 25540                                                                                    | 152      |            |       |      |          |           |
| 25541                                                                                    | 152      |            |       |      |          |           |
| 25542                                                                                    | 152      |            |       |      |          |           |
| 25543                                                                                    | 152      |            |       |      |          |           |
| 25544                                                                                    | 152      |            |       |      |          |           |
| 25545                                                                                    | 152      |            |       |      |          |           |

| Ereignis | Aufnahme | DAPI/CK-PE | CK-PE | DAPI | CD45-APC | HER-2/neu |
|----------|----------|------------|-------|------|----------|-----------|
| 25546    | 152      |            |       |      |          |           |
| 25547    | 152      |            |       |      |          |           |
| 25548    | 152      |            |       |      |          |           |
| 25549    | 152      |            |       |      |          |           |
| 25550    | 152      |            |       |      |          |           |
| 25551    | 152      |            |       |      |          |           |
| 25552    | 152      |            |       |      |          |           |
| 25553    | 152      |            |       |      |          |           |
| 25554    | 152      |            |       |      |          |           |
| 25555    | 152      |            |       |      |          |           |
| 25556    | 152      |            |       |      |          |           |
| 25557    | 152      |            |       |      |          |           |

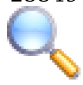

| Ereignis | Aufnahme | DAPI/CK-PE | CK-PE | DAPI | CD45-APC | HER-2/neu |
|----------|----------|------------|-------|------|----------|-----------|
| 25558    | 152      |            |       |      |          |           |
| 25559    | 152      |            |       |      |          |           |
| 25560    | 152      |            |       |      |          |           |
| 25561    | 152      |            |       |      |          |           |
| 25562    | 152      |            |       |      |          |           |
| 25563    | 152      |            |       |      |          |           |
| 25564    | 152      |            |       |      |          |           |
| 25565    | 152      |            |       |      |          |           |
| 25566    | 152      |            |       |      |          |           |
| 25567    | 152      |            |       |      |          |           |
| 25568    | 152      |            |       |      |          |           |
| 25569    | 152      |            |       |      |          |           |

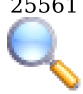



| Ereignis                                                                                | Aufnahme | DAPI/CK-PE | CK-PE | DAPI | CD45-APC | HER-2/neu |
|-----------------------------------------------------------------------------------------|----------|------------|-------|------|----------|-----------|
| 25570                                                                                   | 152      |            |       |      |          |           |
| 25571                                                                                   | 152      |            |       |      |          |           |
| 25572                                                                                   | 152      |            |       |      |          |           |
| 25573                                                                                   | 152      |            |       |      |          |           |
|  25574 | 152      |            |       |      |          |           |
| 25575                                                                                   | 152      |            |       |      |          |           |
| 25576                                                                                   | 152      |            |       |      |          |           |
| 25577                                                                                   | 152      |            |       |      |          |           |
| 25578                                                                                   | 152      |            |       |      |          |           |
| 25579                                                                                   | 152      |            |       |      |          |           |
| 25580                                                                                   | 152      |            |       |      |          |           |
| 25581                                                                                   | 152      |            |       |      |          |           |

| Ereignis                                                                                | Aufnahme | DAPI/CK-PE                                                                          | CK-PE                                                                               | DAPI                                                                                 | CD45-APC                                                                              | HER-2/neu                                                                             |
|-----------------------------------------------------------------------------------------|----------|-------------------------------------------------------------------------------------|-------------------------------------------------------------------------------------|--------------------------------------------------------------------------------------|---------------------------------------------------------------------------------------|---------------------------------------------------------------------------------------|
| 25582  | 152      |    |    |    |    |    |
| 25583  | 152      |    |    |    |    |    |
| 25584  | 152      |    |    |    |    |    |
| 25585                                                                                   | 152      |    |    |    |    |    |
| 25586                                                                                   | 152      |   |   |   |   |   |
| 25587                                                                                   | 152      |  |  |  |  |  |
| 25588                                                                                   | 152      |  |  |  |  |  |
| 25589                                                                                   | 152      |  |  |  |  |  |
| 25590                                                                                   | 152      |  |  |  |  |  |
| 25591                                                                                   | 152      |  |  |  |  |  |
| 25592                                                                                   | 152      |  |  |  |  |  |

| Ereignis                                                                                  | Aufnahme | DAPI/CK-PE | CK-PE | DAPI | CD45-APC | HER-2/neu |
|-------------------------------------------------------------------------------------------|----------|------------|-------|------|----------|-----------|
| 25593                                                                                     | 152      |            |       |      |          |           |
| 25594                                                                                     | 152      |            |       |      |          |           |
| 25595                                                                                     | 152      |            |       |      |          |           |
| 25596                                                                                     | 152      |            |       |      |          |           |
| 25597                                                                                     | 152      |            |       |      |          |           |
| 25598                                                                                     | 152      |            |       |      |          |           |
|  25599 | 152      |            |       |      |          |           |
| 25600                                                                                     | 152      |            |       |      |          |           |
| 25601                                                                                     | 152      |            |       |      |          |           |
| 25602                                                                                     | 152      |            |       |      |          |           |
| 25603                                                                                     | 152      |            |       |      |          |           |
| 25604                                                                                     | 152      |            |       |      |          |           |
| 25605                                                                                     | 152      |            |       |      |          |           |

| Ereignis | Aufnahme | DAPI/CK-PE | CK-PE | DAPI | CD45-APC | HER-2/neu |
|----------|----------|------------|-------|------|----------|-----------|
| 25606    | 152      |            |       |      |          |           |
| 25607    | 152      |            |       |      |          |           |
| 25608    | 152      |            |       |      |          |           |
| 25609    | 152      |            |       |      |          |           |
| 25610    | 152      |            |       |      |          |           |
| 25611    | 152      |            |       |      |          |           |
| 25612    | 152      |            |       |      |          |           |
| 25613    | 152      |            |       |      |          |           |
| 25614    | 152      |            |       |      |          |           |
| 25615    | 152      |            |       |      |          |           |
| 25616    | 152      |            |       |      |          |           |

| Ereignis | Aufnahme | DAPI/CK-PE | CK-PE | DAPI | CD45-APC | HER-2/neu |
|----------|----------|------------|-------|------|----------|-----------|
| 25617    | 152      |            |       |      |          |           |
| 25618    | 152      |            |       |      |          |           |
| 25619    | 152      |            |       |      |          |           |
| 25620    | 152      |            |       |      |          |           |
| 25621    | 152      |            |       |      |          |           |
| 25622    | 152      |            |       |      |          |           |
| 25623    | 152      |            |       |      |          |           |
| 25624    | 152      |            |       |      |          |           |
| 25625    | 152      |            |       |      |          |           |
| 25626    | 152      |            |       |      |          |           |
| 25627    | 152      |            |       |      |          |           |
| 25628    | 152      |            |       |      |          |           |



| Ereignis | Aufnahme | DAPI/CK-PE | CK-PE | DAPI | CD45-APC | HER-2/neu |
|----------|----------|------------|-------|------|----------|-----------|
| 25629    | 152      |            |       |      |          |           |
| 25630    | 152      |            |       |      |          |           |
| 25631    | 152      |            |       |      |          |           |
| 25632    | 152      |            |       |      |          |           |
| 25633    | 152      |            |       |      |          |           |
| 25634    | 152      |            |       |      |          |           |
| 25635    | 152      |            |       |      |          |           |
| 25636    | 152      |            |       |      |          |           |
| 25637    | 152      |            |       |      |          |           |
| 25638    | 152      |            |       |      |          |           |
| 25639    | 152      |            |       |      |          |           |
| 25640    | 152      |            |       |      |          |           |
| 25641    | 152      |            |       |      |          |           |
| 25642    | 152      |            |       |      |          |           |

| Ereignis | Aufnahme | DAPI/CK-PE | CK-PE | DAPI | CD45-APC | HER-2/neu |
|----------|----------|------------|-------|------|----------|-----------|
| 25643    | 152      |            |       |      |          |           |
| 25644    | 152      |            |       |      |          |           |
| 25645    | 152      |            |       |      |          |           |
| 25646    | 152      |            |       |      |          |           |
| 25647    | 152      |            |       |      |          |           |
| 25648    | 152      |            |       |      |          |           |
| 25649    | 152      |            |       |      |          |           |
| 25650    | 152      |            |       |      |          |           |
| 25651    | 152      |            |       |      |          |           |
| 25652    | 152      |            |       |      |          |           |
| 25653    | 152      |            |       |      |          |           |
| 25654    | 152      |            |       |      |          |           |

| Ereignis | Aufnahme | DAPI/CK-PE | CK-PE | DAPI | CD45-APC | HER-2/neu |
|----------|----------|------------|-------|------|----------|-----------|
| 25655    | 152      |            |       |      |          |           |
| 25656    | 152      |            |       |      |          |           |
| 25657    | 152      |            |       |      |          |           |
| 25658    | 152      |            |       |      |          |           |
| 25659    | 152      |            |       |      |          |           |
| 25660    | 152      |            |       |      |          |           |
| 25661    | 129      |            |       |      |          |           |
| 25662    | 151      |            |       |      |          |           |
| 25663    | 152      |            |       |      |          |           |
| 25664    | 129      |            |       |      |          |           |

| Ereignis | Aufnahme | DAPI/CK-PE | CK-PE | DAPI | CD45-APC | HER-2/neu |
|----------|----------|------------|-------|------|----------|-----------|
| 25665    | 129      |            |       |      |          |           |
| 25666    | 129      |            |       |      |          |           |
| 25667    | 152      |            |       |      |          |           |
| 25668    | 152      |            |       |      |          |           |
| 25669    | 152      |            |       |      |          |           |
| 25670    | 152      |            |       |      |          |           |
| 25671    | 129      |            |       |      |          |           |
| 25672    | 153      |            |       |      |          |           |
| 25673    | 153      |            |       |      |          |           |
| 25674    | 153      |            |       |      |          |           |

| Ereignis | Aufnahme | DAPI/CK-PE | CK-PE | DAPI | CD45-APC | HER-2/neu |
|----------|----------|------------|-------|------|----------|-----------|
| 25675    | 153      |            |       |      |          |           |
|          |          |            |       |      |          |           |
| 25676    | 153      |            |       |      |          |           |
| 25677    | 153      |            |       |      |          |           |
| 25678    | 153      |            |       |      |          |           |
| 25679    | 153      |            |       |      |          |           |
| 25680    | 153      |            |       |      |          |           |
| 25681    | 153      |            |       |      |          |           |
| 25682    | 153      |            |       |      |          |           |
| 25683    | 153      |            |       |      |          |           |
| 25684    | 153      |            |       |      |          |           |
| 25685    | 153      |            |       |      |          |           |
| 25686    | 153      |            |       |      |          |           |
| 25687    | 153      |            |       |      |          |           |



| Ereignis | Aufnahme | DAPI/CK-PE | CK-PE | DAPI | CD45-APC | HER-2/neu |
|----------|----------|------------|-------|------|----------|-----------|
| 25688    | 153      |            |       |      |          |           |
| 25689    | 153      |            |       |      |          |           |
| 25690    | 153      |            |       |      |          |           |
| 25691    | 153      |            |       |      |          |           |
| 25692    | 153      |            |       |      |          |           |
| 25693    | 153      |            |       |      |          |           |
| 25694    | 153      |            |       |      |          |           |
| 25695    | 153      |            |       |      |          |           |
| 25696    | 153      |            |       |      |          |           |
| 25697    | 153      |            |       |      |          |           |
| 25698    | 153      |            |       |      |          |           |
| 25699    | 153      |            |       |      |          |           |

| Ereignis | Aufnahme | DAPI/CK-PE | CK-PE | DAPI | CD45-APC | HER-2/neu |
|----------|----------|------------|-------|------|----------|-----------|
| 25700    | 153      |            |       |      |          |           |
| 25701    | 153      |            |       |      |          |           |
| 25702    | 153      |            |       |      |          |           |
| 25703    | 153      |            |       |      |          |           |
| 25704    | 153      |            |       |      |          |           |
| 25705    | 153      |            |       |      |          |           |
| 25706    | 153      |            |       |      |          |           |
| 25707    | 153      |            |       |      |          |           |
| 25708    | 153      |            |       |      |          |           |
| 25709    | 153      |            |       |      |          |           |
| 25710    | 153      |            |       |      |          |           |

| Ereignis | Aufnahme | DAPI/CK-PE | CK-PE | DAPI | CD45-APC | HER-2/neu |
|----------|----------|------------|-------|------|----------|-----------|
| 25711    | 153      |            |       |      |          |           |
| 25712    | 153      |            |       |      |          |           |
| 25713    | 153      |            |       |      |          |           |
| 25714    | 153      |            |       |      |          |           |
| 25715    | 153      |            |       |      |          |           |
| 25716    | 153      |            |       |      |          |           |
| 25717    | 153      |            |       |      |          |           |
| 25718    | 153      |            |       |      |          |           |
| 25719    | 153      |            |       |      |          |           |
| 25720    | 153      |            |       |      |          |           |
| 25721    | 153      |            |       |      |          |           |
| 25722    | 153      |            |       |      |          |           |

| Ereignis | Aufnahme | DAPI/CK-PE | CK-PE | DAPI | CD45-APC | HER-2/neu |
|----------|----------|------------|-------|------|----------|-----------|
| 25723    | 153      |            |       |      |          |           |
| 25724    | 153      |            |       |      |          |           |
| 25725    | 153      |            |       |      |          |           |
| 25726    | 153      |            |       |      |          |           |
| 25727    | 153      |            |       |      |          |           |
| 25728    | 153      |            |       |      |          |           |
| 25729    | 153      |            |       |      |          |           |
| 25730    | 153      |            |       |      |          |           |
| 25731    | 153      |            |       |      |          |           |
| 25732    | 153      |            |       |      |          |           |
| 25733    | 153      |            |       |      |          |           |
| 25734    | 153      |            |       |      |          |           |

| Ereignis | Aufnahme | DAPI/CK-PE                                                                              | CK-PE | DAPI | CD45-APC | HER-2/neu |
|----------|----------|-----------------------------------------------------------------------------------------|-------|------|----------|-----------|
| 25735    | 153      |                                                                                         |       |      |          |           |
| 25736    | 153      |                                                                                         |       |      |          |           |
| 25737    | 153      |                                                                                         |       |      |          |           |
| 25738    | 153      |                                                                                         |       |      |          |           |
| 25739    | 153      |                                                                                         |       |      |          |           |
| 25740    | 153      |                                                                                         |       |      |          |           |
| 25741    | 153      |                                                                                         |       |      |          |           |
| 25742    | 153      | <br> |       |      |          |           |
| 25743    | 153      |                                                                                         |       |      |          |           |
| 25744    | 153      |                                                                                         |       |      |          |           |
| 25745    | 153      | <br> |       |      |          |           |
| 25746    | 153      |                                                                                         |       |      |          |           |



| Ereignis | Aufnahme | DAPI/CK-PE | CK-PE | DAPI | CD45-APC | HER-2/neu |
|----------|----------|------------|-------|------|----------|-----------|
| 25747    | 153      |            |       |      |          |           |
| 25748    | 153      |            |       |      |          |           |
| 25749    | 153      |            |       |      |          |           |
| 25750    | 153      |            |       |      |          |           |
| 25751    | 153      |            |       |      |          |           |
| 25752    | 153      |            |       |      |          |           |
| 25753    | 153      |            |       |      |          |           |
| 25754    | 153      |            |       |      |          |           |
| 25755    | 153      |            |       |      |          |           |
| 25756    | 153      |            |       |      |          |           |
| 25757    | 153      |            |       |      |          |           |
| 25758    | 153      |            |       |      |          |           |

| Ereignis                                                                                  | Aufnahme | DAPI/CK-PE | CK-PE | DAPI | CD45-APC | HER-2/neu |
|-------------------------------------------------------------------------------------------|----------|------------|-------|------|----------|-----------|
| 25759                                                                                     | 153      |            |       |      |          |           |
| 25760                                                                                     | 153      |            |       |      |          |           |
| 25761                                                                                     | 153      |            |       |      |          |           |
| 25762                                                                                     | 153      |            |       |      |          |           |
| 25763                                                                                     | 153      |            |       |      |          |           |
| 25764                                                                                     | 153      |            |       |      |          |           |
| 25765                                                                                     | 153      |            |       |      |          |           |
|  25766 | 153      |            |       |      |          |           |
| 25767                                                                                     | 153      |            |       |      |          |           |
| 25768                                                                                     | 153      |            |       |      |          |           |
| 25769                                                                                     | 153      |            |       |      |          |           |
| 25770                                                                                     | 153      |            |       |      |          |           |
| 25771                                                                                     | 153      |            |       |      |          |           |

| Ereignis | Aufnahme | DAPI/CK-PE | CK-PE | DAPI | CD45-APC | HER-2/neu |
|----------|----------|------------|-------|------|----------|-----------|
| 25772    | 153      |            |       |      |          |           |
| 25773    | 153      |            |       |      |          |           |
| 25774    | 153      |            |       |      |          |           |
| 25775    | 153      |            |       |      |          |           |
| 25776    | 153      |            |       |      |          |           |
| 25777    | 153      |            |       |      |          |           |
| 25778    | 153      |            |       |      |          |           |
| 25779    | 153      |            |       |      |          |           |
| 25780    | 153      |            |       |      |          |           |
| 25781    | 153      |            |       |      |          |           |
| 25782    | 153      |            |       |      |          |           |
| 25783    | 153      |            |       |      |          |           |

| Ereignis | Aufnahme | DAPI/CK-PE | CK-PE | DAPI | CD45-APC | HER-2/neu |
|----------|----------|------------|-------|------|----------|-----------|
| 25784    | 153      |            |       |      |          |           |
| 25785    | 153      |            |       |      |          |           |
| 25786    | 153      |            |       |      |          |           |
| 25787    | 153      |            |       |      |          |           |
| 25788    | 153      |            |       |      |          |           |
| 25789    | 153      |            |       |      |          |           |
| 25790    | 153      |            |       |      |          |           |
| 25791    | 153      |            |       |      |          |           |
| 25792    | 153      |            |       |      |          |           |
| 25793    | 153      |            |       |      |          |           |
| 25794    | 153      |            |       |      |          |           |
| 25795    | 153      |            |       |      |          |           |

| Ereignis | Aufnahme | DAPI/CK-PE | CK-PE | DAPI | CD45-APC | HER-2/neu |
|----------|----------|------------|-------|------|----------|-----------|
| 25796    | 153      |            |       |      |          |           |
| 25797    | 153      |            |       |      |          |           |
| 25798    | 153      |            |       |      |          |           |
| 25799    | 153      |            |       |      |          |           |
| 25800    | 153      |            |       |      |          |           |
| 25801    | 153      |            |       |      |          |           |
| 25802    | 153      |            |       |      |          |           |
| 25803    | 153      |            |       |      |          |           |
| 25804    | 153      |            |       |      |          |           |
| 25805    | 153      |            |       |      |          |           |
| 25806    | 153      |            |       |      |          |           |



| Ereignis | Aufnahme | DAPI/CK-PE                                                                          | CK-PE                                                                               | DAPI                                                                                 | CD45-APC                                                                              | HER-2/neu                                                                             |
|----------|----------|-------------------------------------------------------------------------------------|-------------------------------------------------------------------------------------|--------------------------------------------------------------------------------------|---------------------------------------------------------------------------------------|---------------------------------------------------------------------------------------|
| 25807    | 153      | 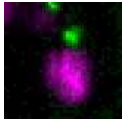   |    |    |    |    |
| 25808    | 153      |    |    |    |    |    |
| 25809    | 153      |    |    |    |    |    |
| 25810    | 153      |    |    |    |    |    |
| 25811    | 153      |    |    |    |    |    |
| 25812    | 153      |    |    |    |    |    |
| 25813    | 153      |   |   |   |   |   |
| 25814    | 153      |  |  |  |  |  |
| 25815    | 153      |  |  |  |  |  |
| 25816    | 153      |  |  |  |  |  |
| 25817    | 153      |  |  |  |  |  |
| 25818    | 153      |  |  |  |  |  |
| 25819    | 153      |  |  |  |  |  |

| Ereignis | Aufnahme | DAPI/CK-PE | CK-PE | DAPI | CD45-APC | HER-2/neu |
|----------|----------|------------|-------|------|----------|-----------|
| 25820    | 153      |            |       |      |          |           |
| 25821    | 153      |            |       |      |          |           |
| 25822    | 153      |            |       |      |          |           |
| 25823    | 153      |            |       |      |          |           |
| 25824    | 153      |            |       |      |          |           |
| 25825    | 153      |            |       |      |          |           |
| 25826    | 153      |            |       |      |          |           |
| 25827    | 153      |            |       |      |          |           |
| 25828    | 153      |            |       |      |          |           |
| 25829    | 153      |            |       |      |          |           |
| 25830    | 153      |            |       |      |          |           |
| 25831    | 153      |            |       |      |          |           |

| Ereignis | Aufnahme | DAPI/CK-PE | CK-PE | DAPI | CD45-APC | HER-2/neu |
|----------|----------|------------|-------|------|----------|-----------|
| 25832    | 152      |            |       |      |          |           |
| 25833    | 128      |            |       |      |          |           |
| 25834    | 152      |            |       |      |          |           |
| 25835    | 128      |            |       |      |          |           |
| 25836    | 153      |            |       |      |          |           |
| 25837    | 128      |            |       |      |          |           |
| 25838    | 128      |            |       |      |          |           |
| 25839    | 153      |            |       |      |          |           |
| 25840    | 153      |            |       |      |          |           |
| 25841    | 153      |            |       |      |          |           |

| Ereignis | Aufnahme | DAPI/CK-PE | CK-PE | DAPI | CD45-APC | HER-2/neu |
|----------|----------|------------|-------|------|----------|-----------|
| 25842    | 153      |            |       |      |          |           |
| 25843    | 128      |            |       |      |          |           |
| 25844    | 128      |            |       |      |          |           |
| 25845    | 154      |            |       |      |          |           |
| 25846    | 154      |            |       |      |          |           |
| 25847    | 154      |            |       |      |          |           |
| 25848    | 154      |            |       |      |          |           |
| 25849    | 154      |            |       |      |          |           |
| 25850    | 154      |            |       |      |          |           |
| 25851    | 154      |            |       |      |          |           |
| 25852    | 154      |            |       |      |          |           |

| Ereignis | Aufnahme | DAPI/CK-PE                                                                          | CK-PE                                                                               | DAPI                                                                                 | CD45-APC                                                                              | HER-2/neu                                                                             |
|----------|----------|-------------------------------------------------------------------------------------|-------------------------------------------------------------------------------------|--------------------------------------------------------------------------------------|---------------------------------------------------------------------------------------|---------------------------------------------------------------------------------------|
| 25853    | 154      | 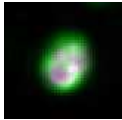   |    |    |    |    |
| 25854    | 154      |    |    |    |    |    |
| 25855    | 154      |    |    |    |    |    |
| 25856    | 154      |    |    |    |    |    |
| 25857    | 154      |    |    |    |    |    |
| 25858    | 154      |    |    |    |    |    |
| 25859    | 154      |   |   |   |   |   |
| 25860    | 154      |  |  |  |  |  |
| 25861    | 154      |  |  |  |  |  |
| 25862    | 154      |  |  |  |  |  |
| 25863    | 154      |  |  |  |  |  |
| 25864    | 154      |  |  |  |  |  |
| 25865    | 154      |  |  |  |  |  |



| Ereignis | Aufnahme | DAPI/CK-PE | CK-PE | DAPI | CD45-APC | HER-2/neu |
|----------|----------|------------|-------|------|----------|-----------|
| 25866    | 154      |            |       |      |          |           |
| 25867    | 154      |            |       |      |          |           |
| 25868    | 154      |            |       |      |          |           |
| 25869    | 154      |            |       |      |          |           |
| 25870    | 154      |            |       |      |          |           |
| 25871    | 154      |            |       |      |          |           |
| 25872    | 154      |            |       |      |          |           |
| 25873    | 154      |            |       |      |          |           |
| 25874    | 154      |            |       |      |          |           |
| 25875    | 154      |            |       |      |          |           |
| 25876    | 154      |            |       |      |          |           |
| 25877    | 154      |            |       |      |          |           |
| 25878    | 154      |            |       |      |          |           |

| Ereignis                                                                                  | Aufnahme | DAPI/CK-PE | CK-PE | DAPI | CD45-APC | HER-2/neu |
|-------------------------------------------------------------------------------------------|----------|------------|-------|------|----------|-----------|
| 25879                                                                                     | 154      |            |       |      |          |           |
| 25880                                                                                     | 154      |            |       |      |          |           |
| 25881                                                                                     | 154      |            |       |      |          |           |
| 25882                                                                                     | 154      |            |       |      |          |           |
| 25883                                                                                     | 154      |            |       |      |          |           |
| 25884                                                                                     | 154      |            |       |      |          |           |
| 25885                                                                                     | 154      |            |       |      |          |           |
| 25886                                                                                     | 154      |            |       |      |          |           |
| 25887                                                                                     | 154      |            |       |      |          |           |
| 25888                                                                                     | 154      |            |       |      |          |           |
| 25889                                                                                     | 154      |            |       |      |          |           |
| 25890                                                                                     | 154      |            |       |      |          |           |
|  25891 | 154      |            |       |      |          |           |

| Ereignis | Aufnahme | DAPI/CK-PE | CK-PE | DAPI | CD45-APC | HER-2/neu |
|----------|----------|------------|-------|------|----------|-----------|
| 25892    | 154      |            |       |      |          |           |
| 25893    | 154      |            |       |      |          |           |
| 25894    | 154      |            |       |      |          |           |
| 25895    | 154      |            |       |      |          |           |
| 25896    | 154      |            |       |      |          |           |
| 25897    | 154      |            |       |      |          |           |
| 25898    | 154      |            |       |      |          |           |
| 25899    | 154      |            |       |      |          |           |
| 25900    | 154      |            |       |      |          |           |
| 25901    | 154      |            |       |      |          |           |
| 25902    | 154      |            |       |      |          |           |

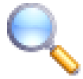

| Ereignis                                                                                     | Aufnahme | DAPI/CK-PE                                                                          | CK-PE                                                                               | DAPI                                                                                 | CD45-APC                                                                              | HER-2/neu                                                                             |
|----------------------------------------------------------------------------------------------|----------|-------------------------------------------------------------------------------------|-------------------------------------------------------------------------------------|--------------------------------------------------------------------------------------|---------------------------------------------------------------------------------------|---------------------------------------------------------------------------------------|
| 25903<br>   | 154      |    |    |    |    |    |
| 25904                                                                                        | 154      |    |    |    |    |    |
| 25905                                                                                        | 154      |    |    |    |    |    |
| 25906                                                                                        | 154      |    |    |    |    |    |
| 25907                                                                                        | 154      |    |    |    |    |    |
| 25908                                                                                        | 154      |   |   |   |   |   |
| 25909                                                                                        | 154      |  |  |  |  |  |
| 25910                                                                                        | 154      |  |  |  |  |  |
| 25911                                                                                        | 154      |  |  |  |  |  |
| 25912<br> | 154      |  |  |  |  |  |
| 25913                                                                                        | 154      |  |  |  |  |  |



| Ereignis | Aufnahme | DAPI/CK-PE | CK-PE | DAPI | CD45-APC | HER-2/neu |
|----------|----------|------------|-------|------|----------|-----------|
| 25914    | 154      |            |       |      |          |           |
| 25915    | 154      |            |       |      |          |           |
| 25916    | 154      |            |       |      |          |           |
| 25917    | 154      |            |       |      |          |           |
| 25918    | 154      |            |       |      |          |           |
| 25919    | 154      |            |       |      |          |           |
| 25920    | 154      |            |       |      |          |           |
| 25921    | 154      |            |       |      |          |           |
| 25922    | 154      |            |       |      |          |           |
| 25923    | 154      |            |       |      |          |           |
| 25924    | 154      |            |       |      |          |           |



| Ereignis | Aufnahme | DAPI/CK-PE                                                                          | CK-PE                                                                               | DAPI                                                                                 | CD45-APC                                                                              | HER-2/neu                                                                             |
|----------|----------|-------------------------------------------------------------------------------------|-------------------------------------------------------------------------------------|--------------------------------------------------------------------------------------|---------------------------------------------------------------------------------------|---------------------------------------------------------------------------------------|
| 25925    | 154      | 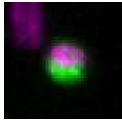   |    |    |    |    |
| 25926    | 154      |    |    |    |    |    |
| 25927    | 154      |    |    |    |    |    |
| 25928    | 154      |    |    |    |    |    |
| 25929    | 154      |    |    |    |    |    |
| 25930    | 154      |   |   |   |   |   |
| 25931    | 154      |  |  |  |  |  |
| 25932    | 154      |  |  |  |  |  |
| 25933    | 154      |  |  |  |  |  |
| 25934    | 154      |  |  |  |  |  |
| 25935    | 154      |  |  |  |  |  |
| 25936    | 154      |  |  |  |  |  |

| Ereignis | Aufnahme | DAPI/CK-PE | CK-PE | DAPI | CD45-APC | HER-2/neu |
|----------|----------|------------|-------|------|----------|-----------|
| 25937    | 154      |            |       |      |          |           |
| 25938    | 154      |            |       |      |          |           |
| 25939    | 154      |            |       |      |          |           |
| 25940    | 154      |            |       |      |          |           |
| 25941    | 154      |            |       |      |          |           |
| 25942    | 154      |            |       |      |          |           |
| 25943    | 154      |            |       |      |          |           |
| 25944    | 154      |            |       |      |          |           |
| 25945    | 154      |            |       |      |          |           |
| 25946    | 154      |            |       |      |          |           |
| 25947    | 154      |            |       |      |          |           |
| 25948    | 154      |            |       |      |          |           |

| Ereignis | Aufnahme | DAPI/CK-PE                                                                          | CK-PE                                                                               | DAPI                                                                                 | CD45-APC                                                                              | HER-2/neu                                                                             |
|----------|----------|-------------------------------------------------------------------------------------|-------------------------------------------------------------------------------------|--------------------------------------------------------------------------------------|---------------------------------------------------------------------------------------|---------------------------------------------------------------------------------------|
| 25949    | 154      | 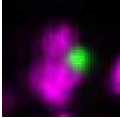   |    |    |    |    |
| 25950    | 154      |    |    |    |    |    |
| 25951    | 154      |    |    |    |    |    |
| 25952    | 154      |    |    |    |    |    |
| 25953    | 154      |    |    |    |    |    |
| 25954    | 154      |   |   |   |   |   |
| 25955    | 154      |  |  |  |  |  |
| 25956    | 154      |  |  |  |  |  |
| 25957    | 154      |  |  |  |  |  |
| 25958    | 154      |  |  |  |  |  |
| 25959    | 154      |  |  |  |  |  |

| Ereignis | Aufnahme | DAPI/CK-PE | CK-PE | DAPI | CD45-APC | HER-2/neu |
|----------|----------|------------|-------|------|----------|-----------|
| 25960    | 154      |            |       |      |          |           |
| 25961    | 154      |            |       |      |          |           |
| 25962    | 154      |            |       |      |          |           |
| 25963    | 154      |            |       |      |          |           |
| 25964    | 154      |            |       |      |          |           |
| 25965    | 154      |            |       |      |          |           |
| 25966    | 154      |            |       |      |          |           |
| 25967    | 154      |            |       |      |          |           |
| 25968    | 154      |            |       |      |          |           |
| 25969    | 154      |            |       |      |          |           |
| 25970    | 154      |            |       |      |          |           |
| 25971    | 154      |            |       |      |          |           |



| Ereignis | Aufnahme | DAPI/CK-PE | CK-PE | DAPI | CD45-APC | HER-2/neu |
|----------|----------|------------|-------|------|----------|-----------|
| 25972    | 154      |            |       |      |          |           |
| 25973    | 154      |            |       |      |          |           |
| 25974    | 154      |            |       |      |          |           |
| 25975    | 154      |            |       |      |          |           |
| 25976    | 154      |            |       |      |          |           |
| 25977    | 154      |            |       |      |          |           |
| 25978    | 154      |            |       |      |          |           |
| 25979    | 154      |            |       |      |          |           |
| 25980    | 154      |            |       |      |          |           |
| 25981    | 154      |            |       |      |          |           |
| 25982    | 154      |            |       |      |          |           |
| 25983    | 154      |            |       |      |          |           |
| 25984    | 154      |            |       |      |          |           |



| Ereignis | Aufnahme | DAPI/CK-PE | CK-PE | DAPI | CD45-APC | HER-2/neu |
|----------|----------|------------|-------|------|----------|-----------|
| 25985    | 153      |            |       |      |          |           |
| 25986    | 153      |            |       |      |          |           |
| 25987    | 127      |            |       |      |          |           |
| 25988    | 127      |            |       |      |          |           |
| 25989    | 154      |            |       |      |          |           |
| 25990    | 127      |            |       |      |          |           |
| 25991    | 154      |            |       |      |          |           |
| 25992    | 154      |            |       |      |          |           |
| 25993    | 127      |            |       |      |          |           |

| Ereignis                                                                                  | Aufnahme | DAPI/CK-PE | CK-PE | DAPI | CD45-APC | HER-2/neu |
|-------------------------------------------------------------------------------------------|----------|------------|-------|------|----------|-----------|
| 25994                                                                                     | 153      |            |       |      |          |           |
| 25995                                                                                     | 127      |            |       |      |          |           |
| 25996                                                                                     | 154      |            |       |      |          |           |
| 25997                                                                                     | 127      |            |       |      |          |           |
|  25998   | 155      |            |       |      |          |           |
| 25999                                                                                     | 155      |            |       |      |          |           |
|  26000 | 155      |            |       |      |          |           |
