# Supplementary material for: Characterization of circulating breast cancer cells with tumorigenic and metastatic capacity
Source: PubMed Central journal article supplement (PMC7507517; doi:10.15252/emmm.201911908), 2020-07-15
Supplement: EMMM-12-e11908-s009.pdf [file EMMM-12-e11908-s009.pdf]

20  $\mu$ m

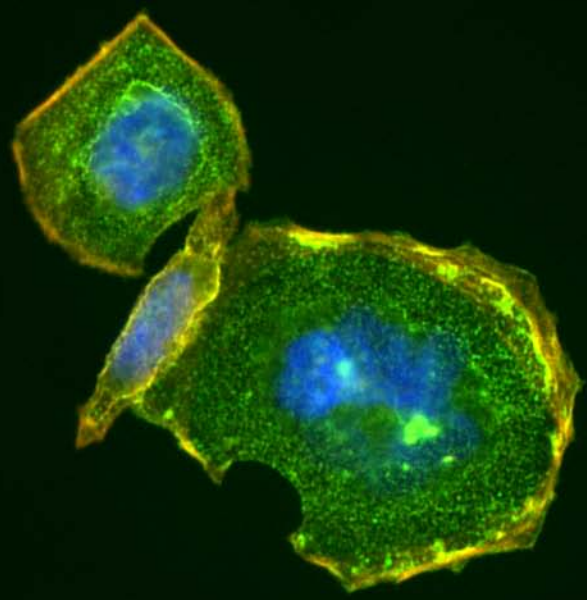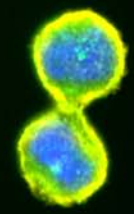

20  $\mu$ m

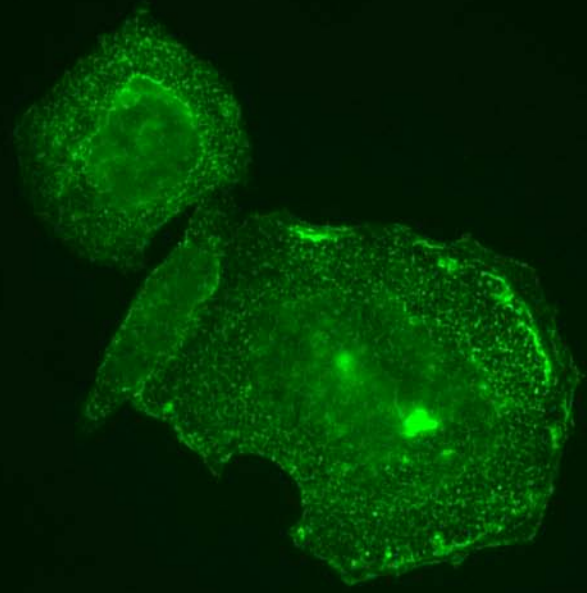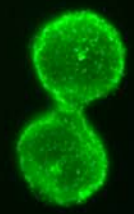

20  $\mu$ m

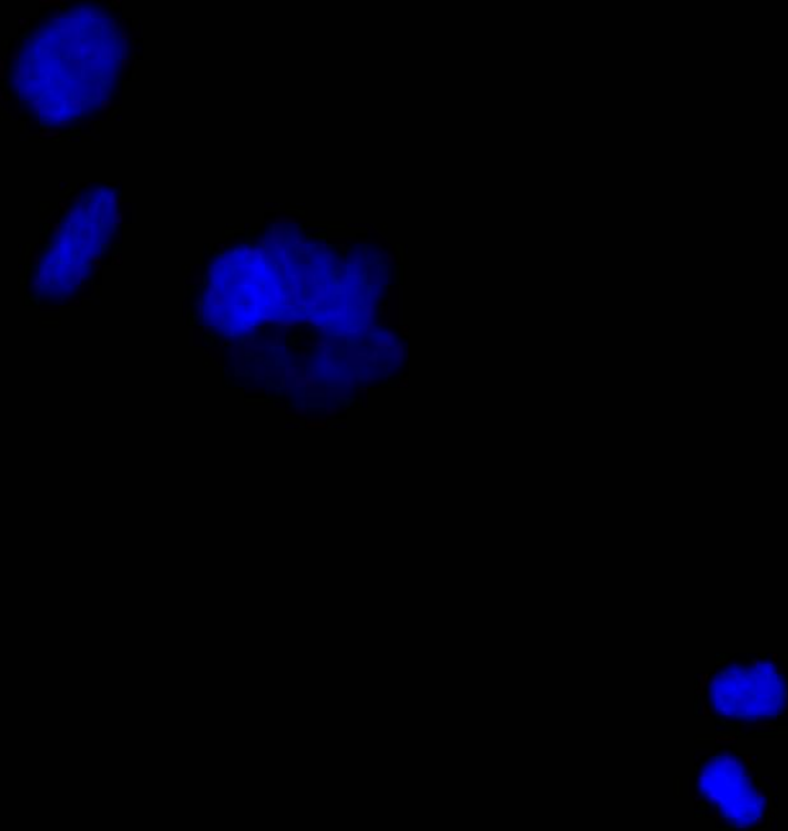

20  $\mu$ m

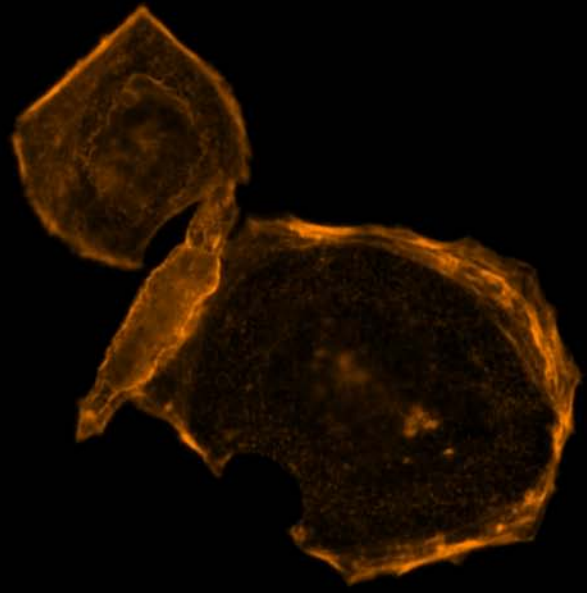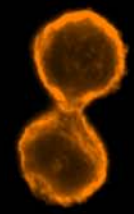

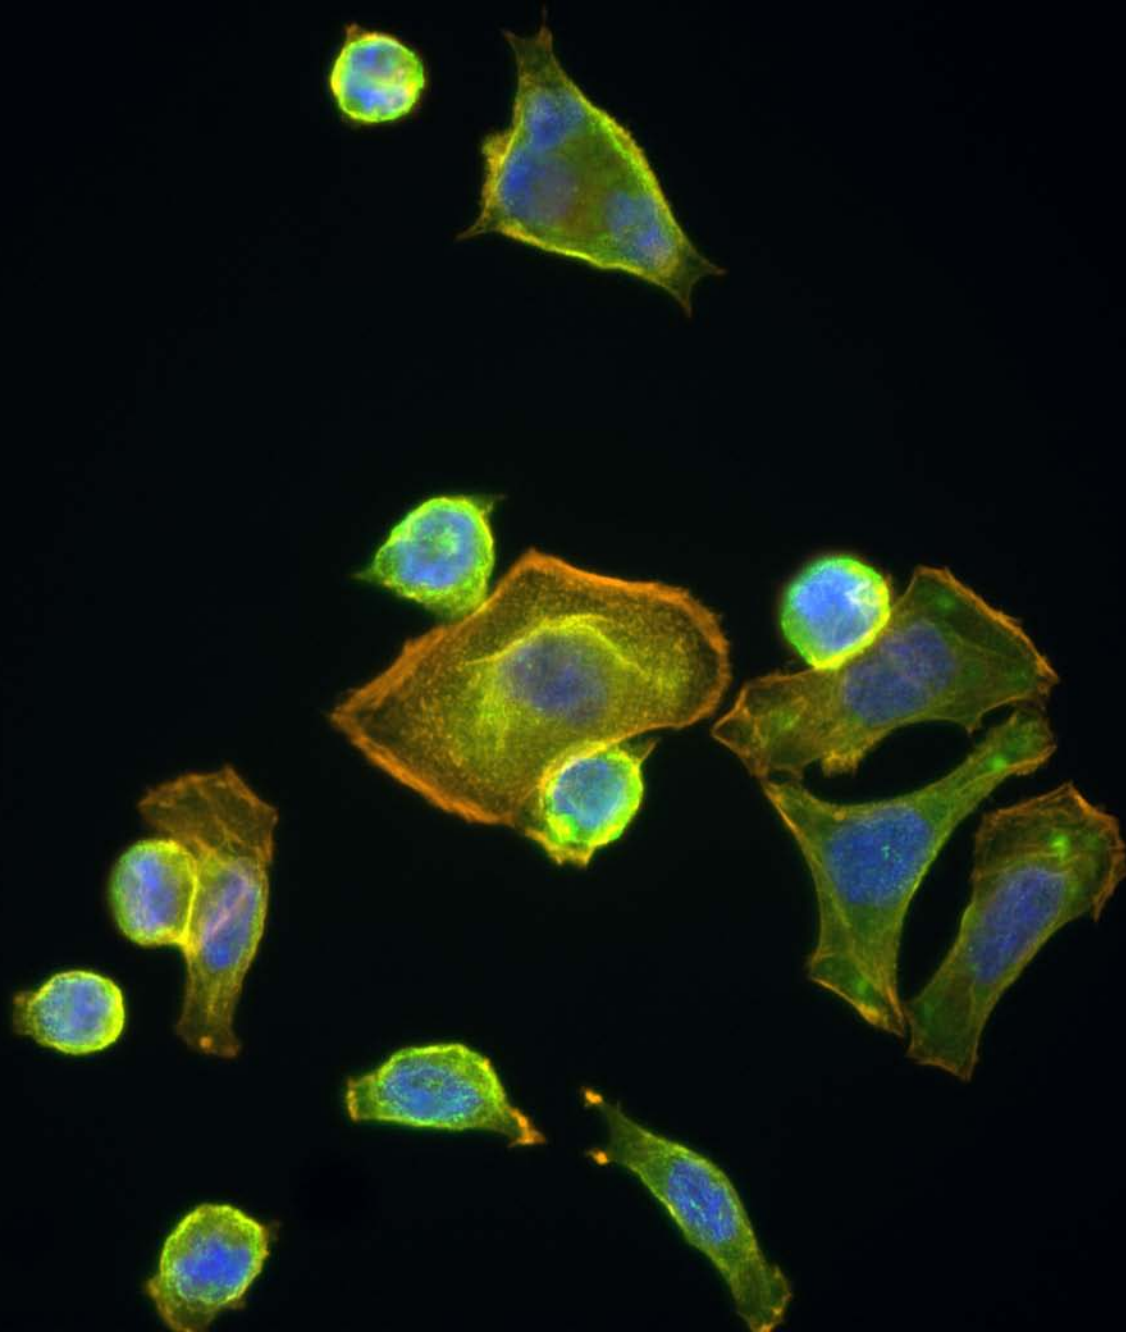

20  $\mu$ m

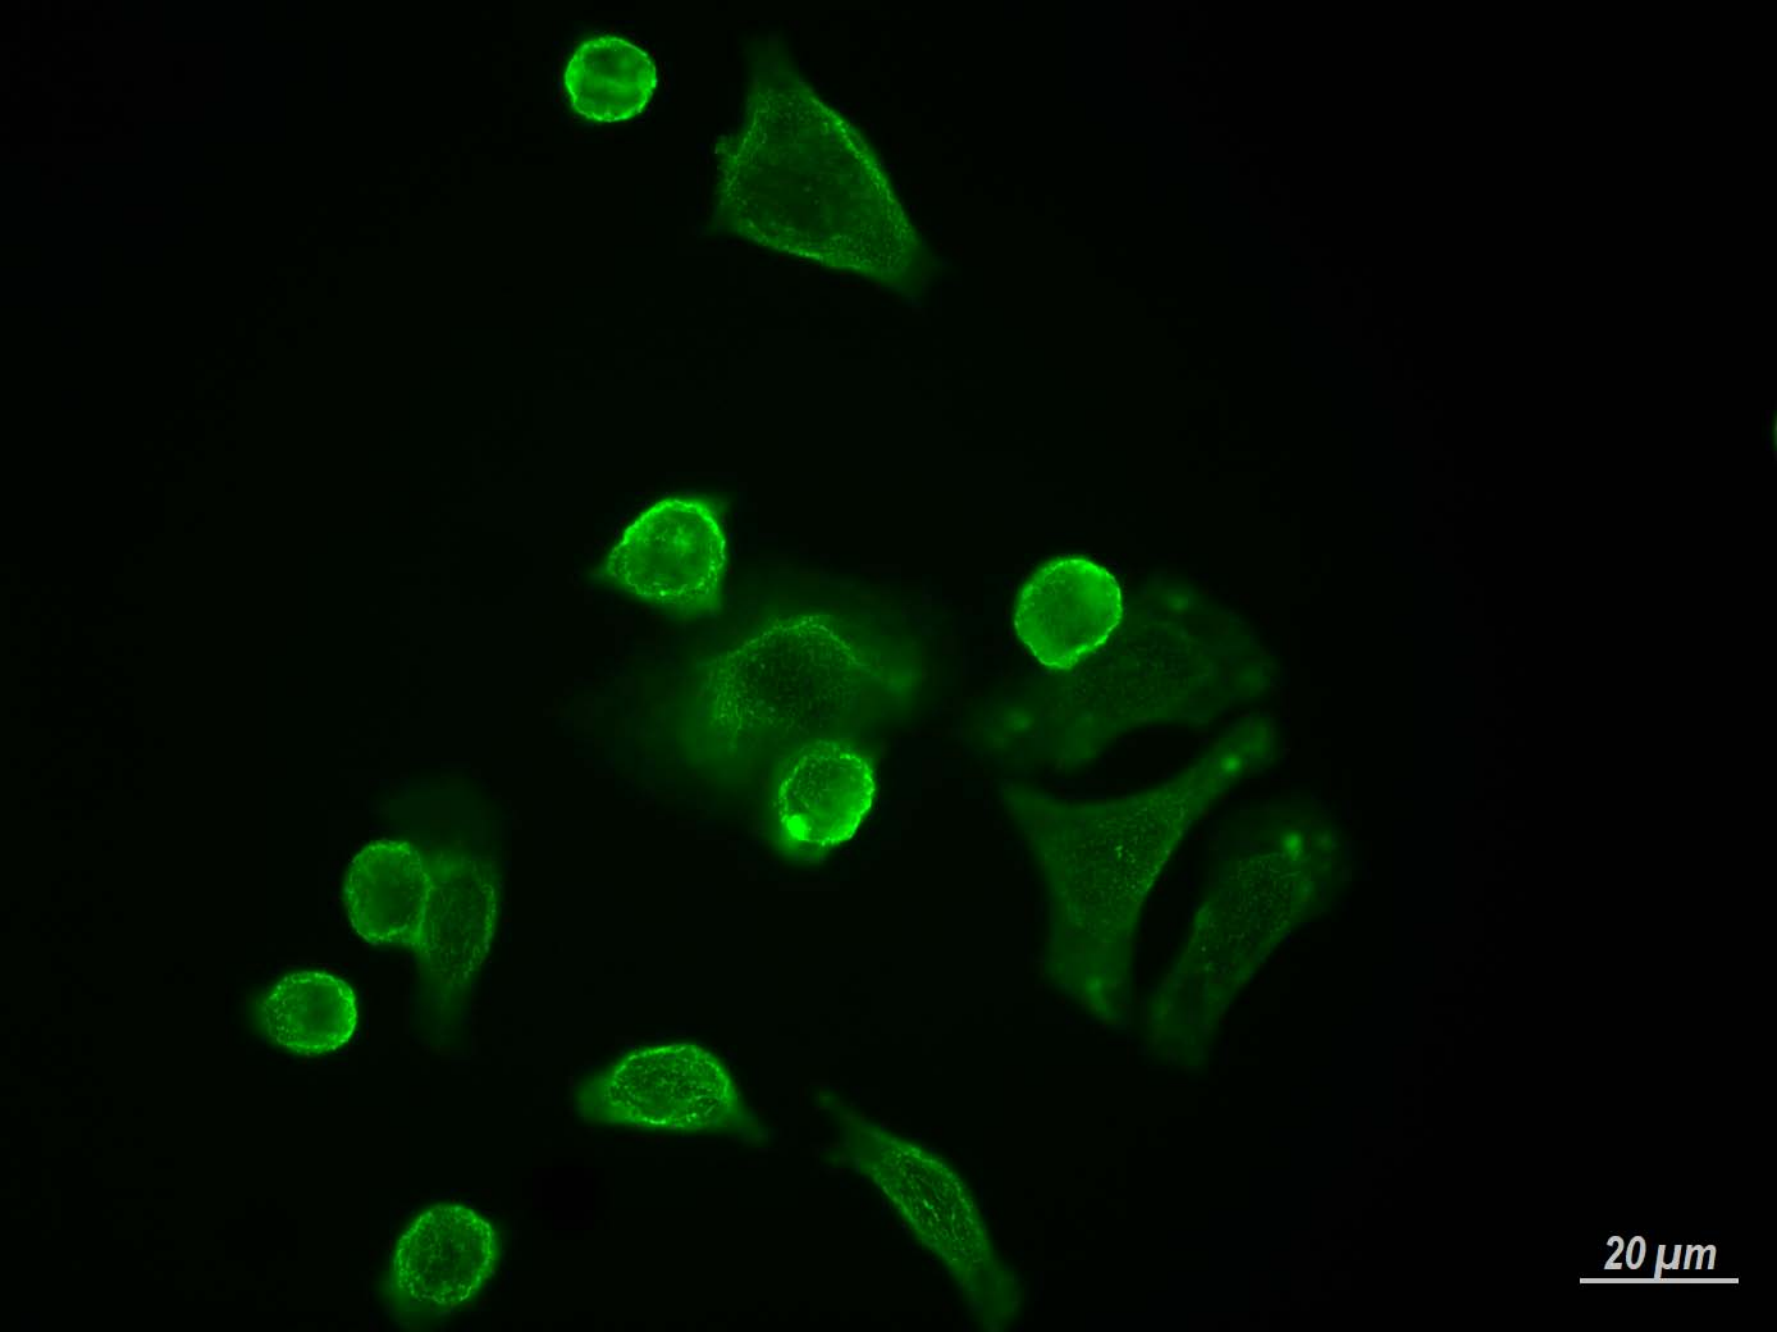

20  $\mu$ m

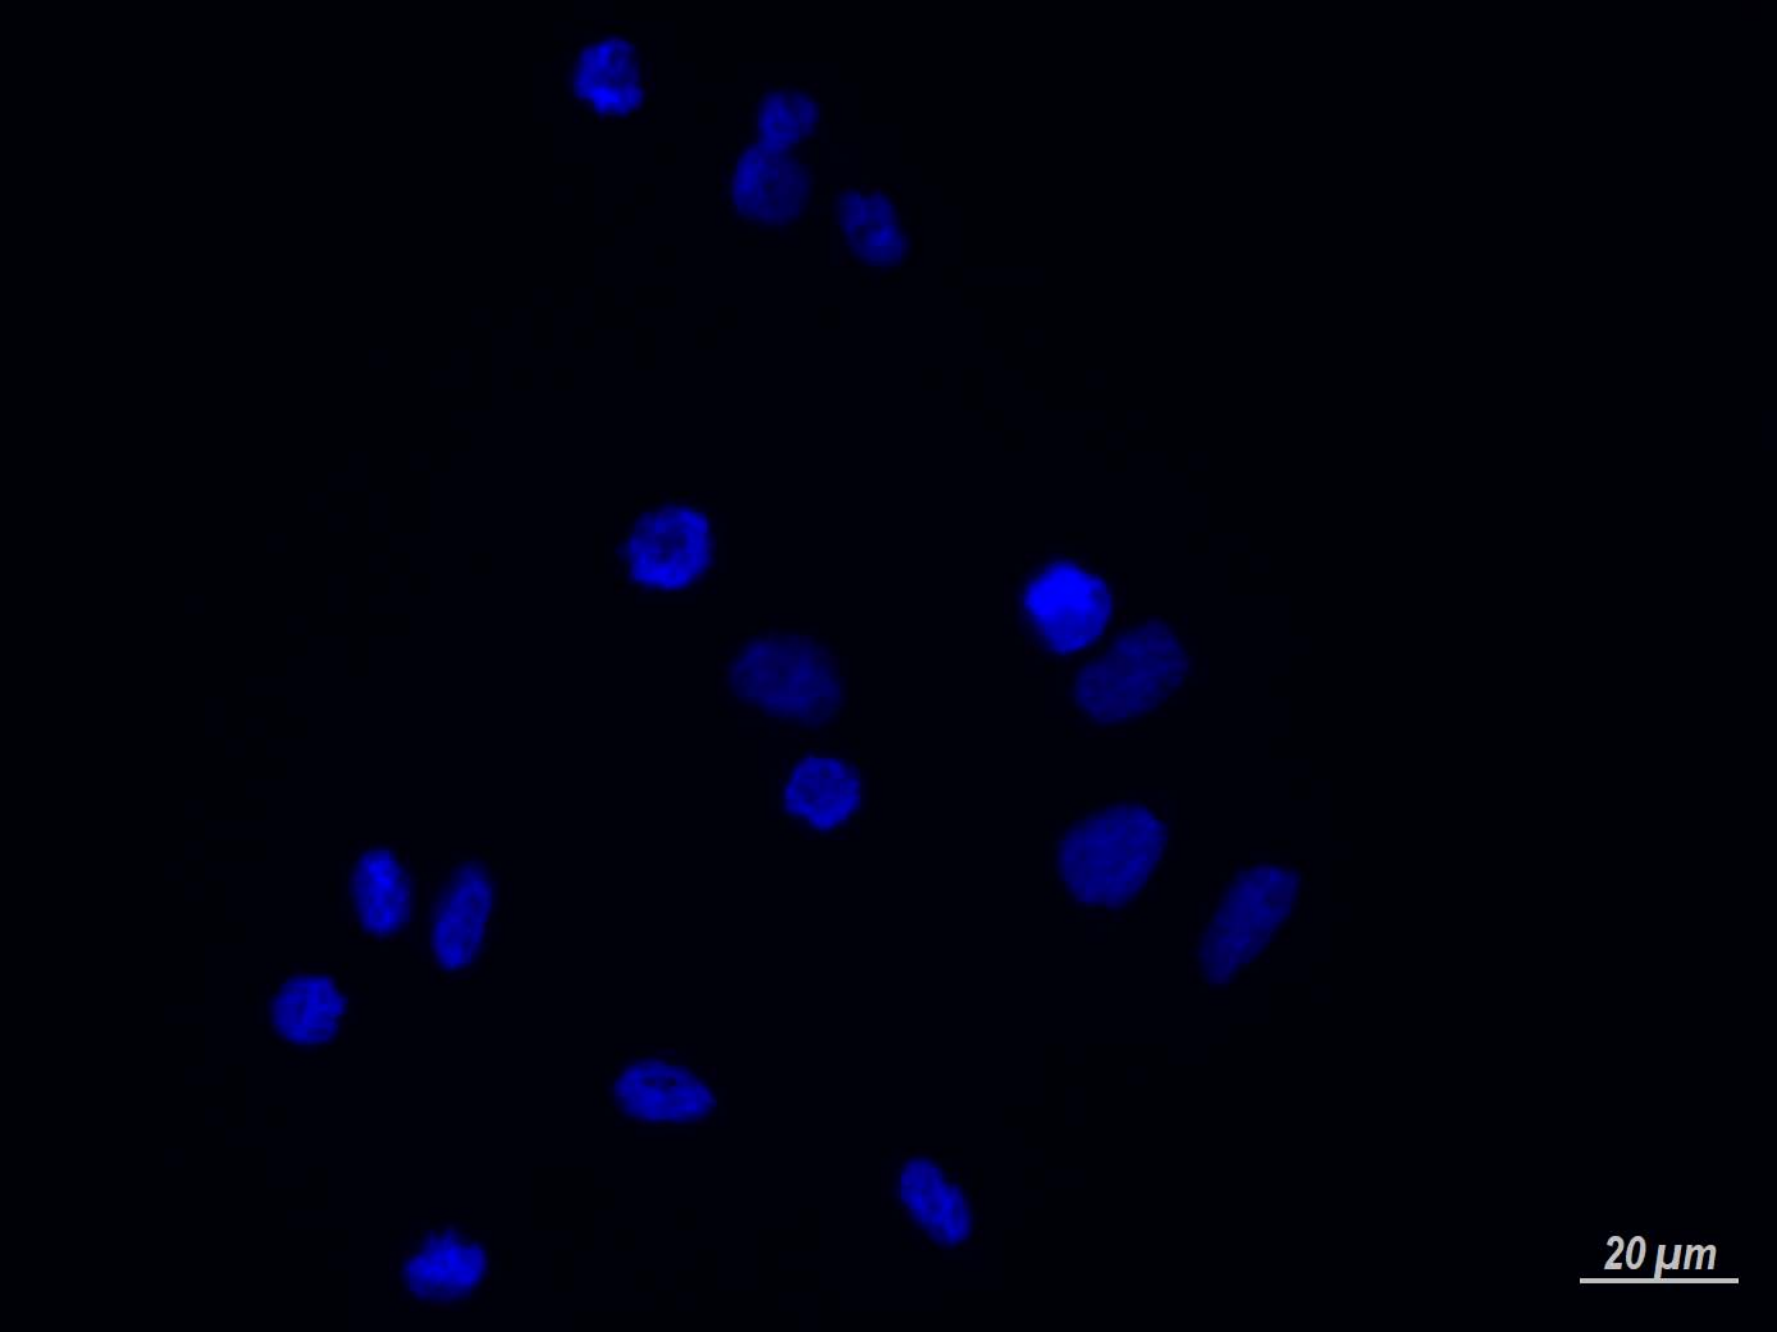

20  $\mu$ m

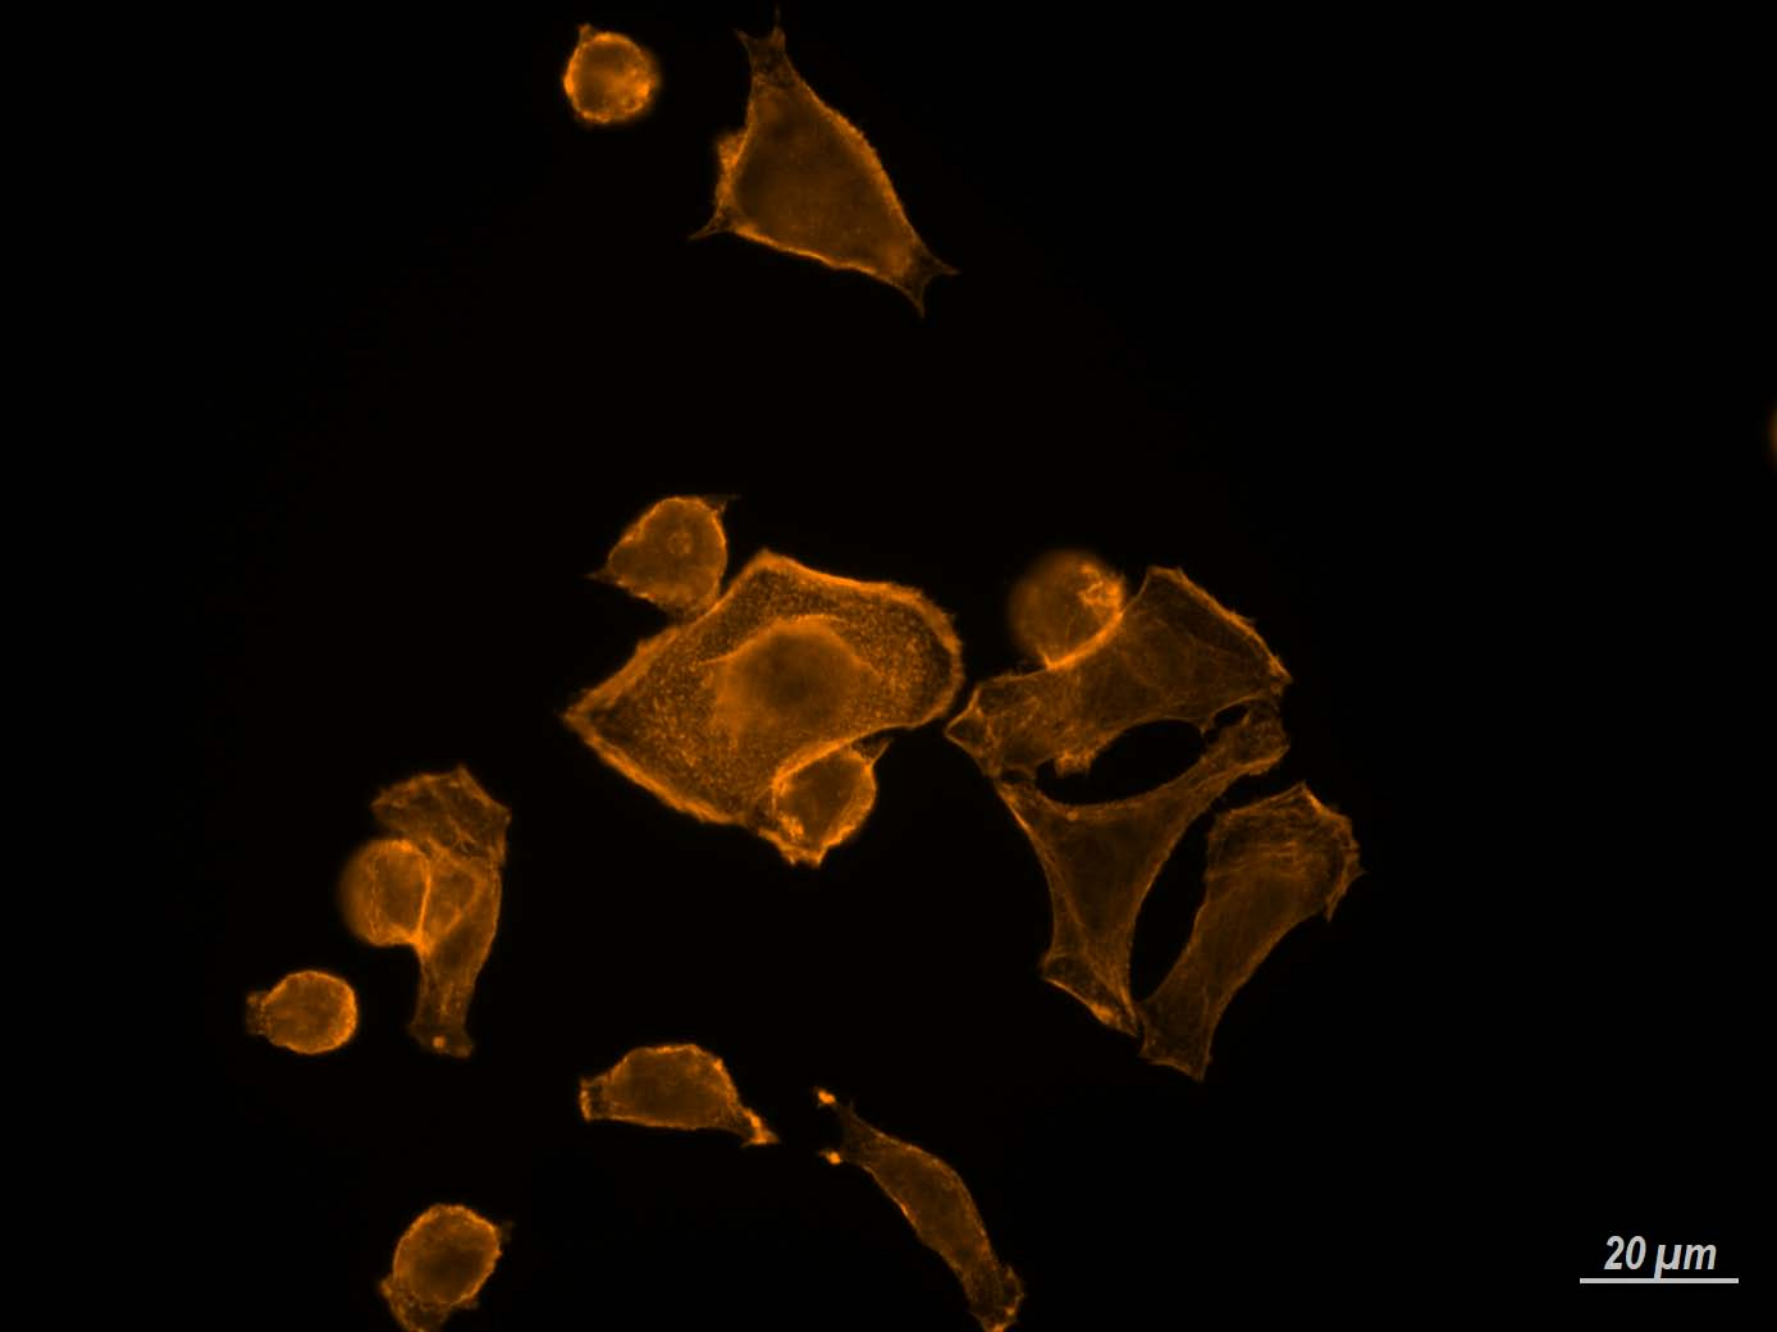

20 μm



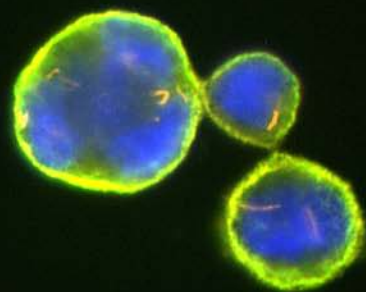

20  $\mu$ m

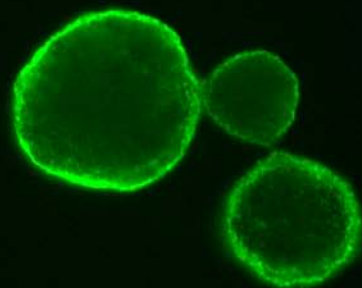

20  $\mu$ m

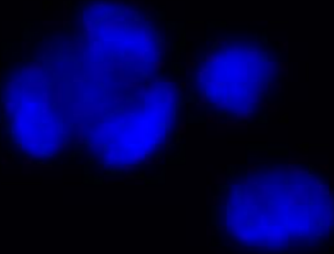

20  $\mu$ m

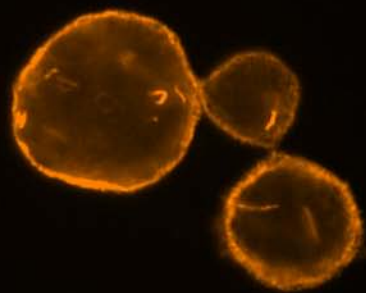

20  $\mu$ m

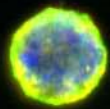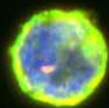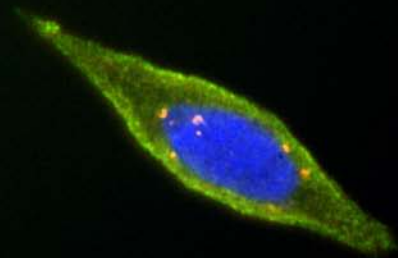

20  $\mu$ m

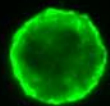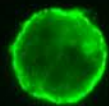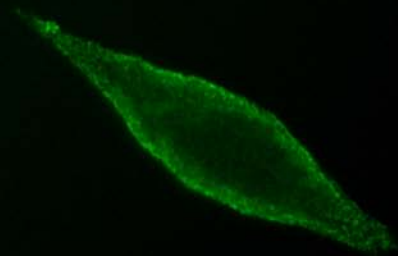

20  $\mu\text{m}$

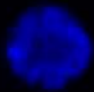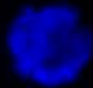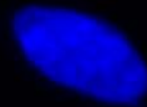

20  $\mu$ m

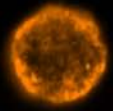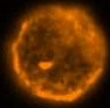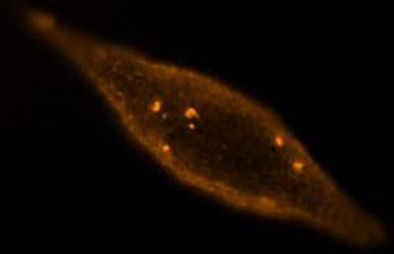

20  $\mu$ m
